# Supplementary material for: Conformations of Flanking Bases in HIV-1 RNA DIS Kissing Complexes Studied by Molecular Dynamics
Source: PubMed Central journal article supplement — Biophys J. 2007 Aug 17;93(11):3932–49. doi: 10.1529/biophysj.107.110056 (PMC2099213; doi:10.1529/biophysj.107.110056), 2007-08-17
Supplement: biophysj_107.110056_1.pdf [file biophysj_107.110056_1.pdf]

## Supplementary Material

### Supplementary Material contains:

A – Simulations with preliminary x-ray data

B – MM-GBSA calculations

C – Five PDB files of MD averaged structures with main conformations of bulges (i.e., closed, locked stacked, closed-like bulged-in, closed-like bulged-in/out and 3R-bulged-out conformations). Averaged MD structure with open conformation is not provided since it can be seen in PDB files 1XPF, 1XPE and many other x-ray structures (1).

### **A – Simulations with preliminary x-ray data**

Refined x-ray HIV-1 subtype A and B DIS structures (PDB codes 1XPF and 1XPE) were simulated with preliminary ion distributions (in simulations S\_MD\_A and S\_MD\_B). Subtype A contained two extra  $Mg^{2+}$  ions and subtype B three extra  $Mg^{2+}$  ions (compare Figs. S1 and 7). These excessive ions were not properly assigned and were later removed from the final refined structures. Their inclusion, however, does not appear to substantially affect the simulations.

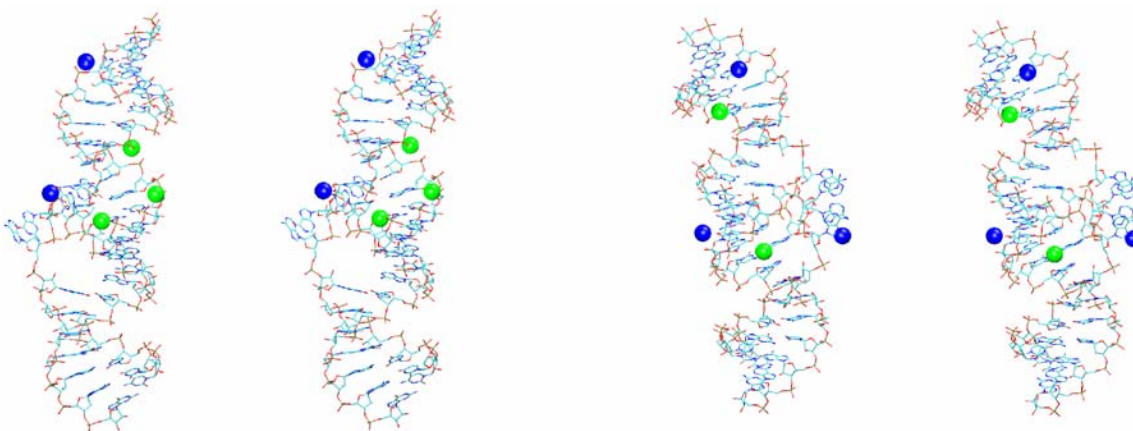

**Figure S1** Stereo views of refined x-ray HIV-1 subtype A DIS (left) and subtype B DIS (right) structures with preliminary x-ray distributions of  $Mg^{2+}$  ions (in green and in blue). The incorrectly placed  $Mg^{2+}$  ions are those in blue.

For the 12 ns of the simulation S\_MD\_A we observed the initial open conformation. After that closed conformation formed and was stable till 20 ns. At 20 ns flanking base  $A_{272}^*$  moved toward the pocket interior where it formed H-bonds  $A_{272}^*(N6)-A_{280}^*(N1)$  and  $A_{272}^*(N1)-A_{280}^*(N6)$  with opposite  $A_{280}^*$  while the remaining three flanking bases stacked in 3R-bulged-out conformation. This architecture was maintained till the end of the simulation. In the closed conformation glycosidic torsions of bulges ranged from  $-60^\circ$  to  $-100^\circ$ . Movement of  $A_{272}^*$  toward interior of the pocket is coupled with change of glycosidic torsion to syn conformation ( $\sim 50^\circ$ ). Time course of  $\theta$  parameter is plotted in Fig. S2.

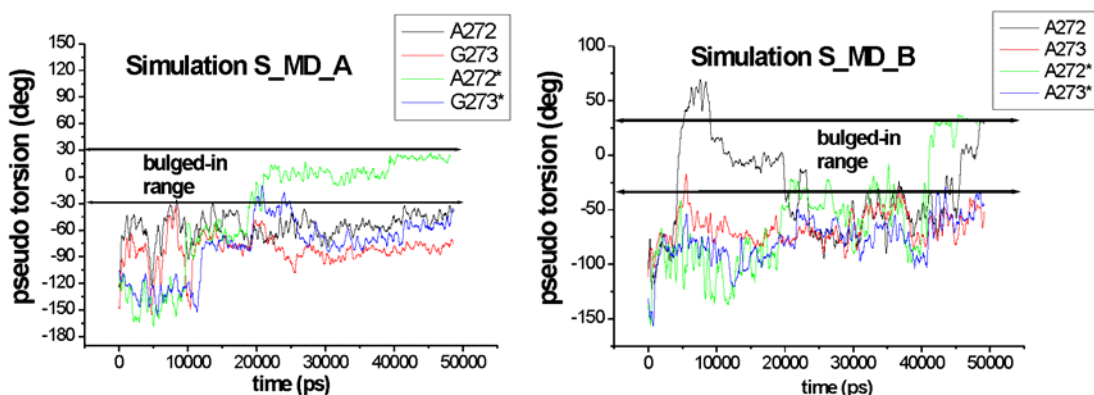

**Figure S2** Time course of parameter  $\theta$  calculated for flanking bases in simulations S\_MD\_A and S\_MD\_B.

At the beginning of the simulation S\_MD\_B the bulges formed the closed conformation. It was stable during the whole simulation except of several disruptions when A<sub>272</sub> and A<sub>272</sub>\* moved entirely inside the pocket (see time course of the  $\theta$  parameter in Fig. S2). Bulges inside the cavity formed temporary H-bonds: A<sub>272</sub>(N6)-A<sub>280</sub>(N1), and A<sub>272</sub>\*(C2)-A<sub>280</sub>\*(N1) and A<sub>272</sub>\*(N1)-A<sub>280</sub>\*(N6). In the closed conformation glycosidic torsions of bulges ranged from  $-80^\circ$  to  $-100^\circ$ . Movement of A<sub>272</sub>\* toward inside the cavity is coupled with change of glycosidic torsion to syn conformation ( $\sim 40^\circ$ ).

## B – MM-GBSA calculations.

MM-GBSA (Molecular Mechanics, Generalised Born, and Surface Area) method is a common method that allows free energy analysis of the explicit solvent MD trajectories via postprocessing of the trajectories. It is based on a continuum solvent approach that replaces the explicit solvent and utilizes directly snapshots from the simulations (2). MM-GBSA method implemented in AMBER-8.0 package (3) was utilized to estimate total free energy (excluding entropic term) of the kissing loop complexes in the course of the simulations to capture energetic changes during bulged-out/bulged-in conversions and in formation of flanking conformations. Such calculations were carried out for simulations MD\_A\_1-2, MD\_B\_1-2, and MD\_F\_1-2 with newly refined kissing complexes (listed in Fig. S3). Every fifth snapshot was analyzed. The calculation of MM-GBSA energy included calculations of Molecular Mechanics energy (EMM) and solvation energy (EGBSA). EMM was calculated by Sander module of AMBER-8.0 (3,4) (explicit solvent and ions were not included) with parm99 (5). EGBSA is composed of two types of contributions, electrostatic (EGB) and van der Waals (ESA). The electrostatic part was derived with Generalized Born approximation using the Jayaram et al. model (6). The van der Waals part depends on solvent accessible surface area (SASA) and was calculated using sander module (SASA parameters were  $A=0.00542$  kcal/Å<sup>2</sup> and  $B=0.92$  kcal/mol (7)). A dielectric constant of 1.00 was used for the solute region.

The courses of MM-GBSA energy in six trajectories are plotted in Fig. S3. Decrease of free energy (by about 15 kcal/mol) is obvious at bulged-out  $\rightarrow$  bulged-in conversion in MD\_B\_2 simulation. However, correlation between observed flanking conformation in certain time periods and the total energy is not clear. Particularly, in

MD\_B\_1 simulation we noticed decrease of MM-GBSA energy by about several kcal/mol after the open conformation → 3R-bulged-out conformation conversion. Similar trend is seen in MD\_F\_2 simulation for the open conformation → closed conformation conversion. It may indicate that stacked 3R-bulged-out and closed conformations are more favorable than the initial x-ray open conformation. However, this conclusion is not supported by MD\_A simulations. It seems that MM-GBSA approach is too crude to capture energetic changes of bulges in simulations. The inherent inaccuracy limits are too large and also the likely subtle real free energy changes accompanying the flanking base movements are entirely hidden in the overall fluctuations of the MM-GBSA energies.

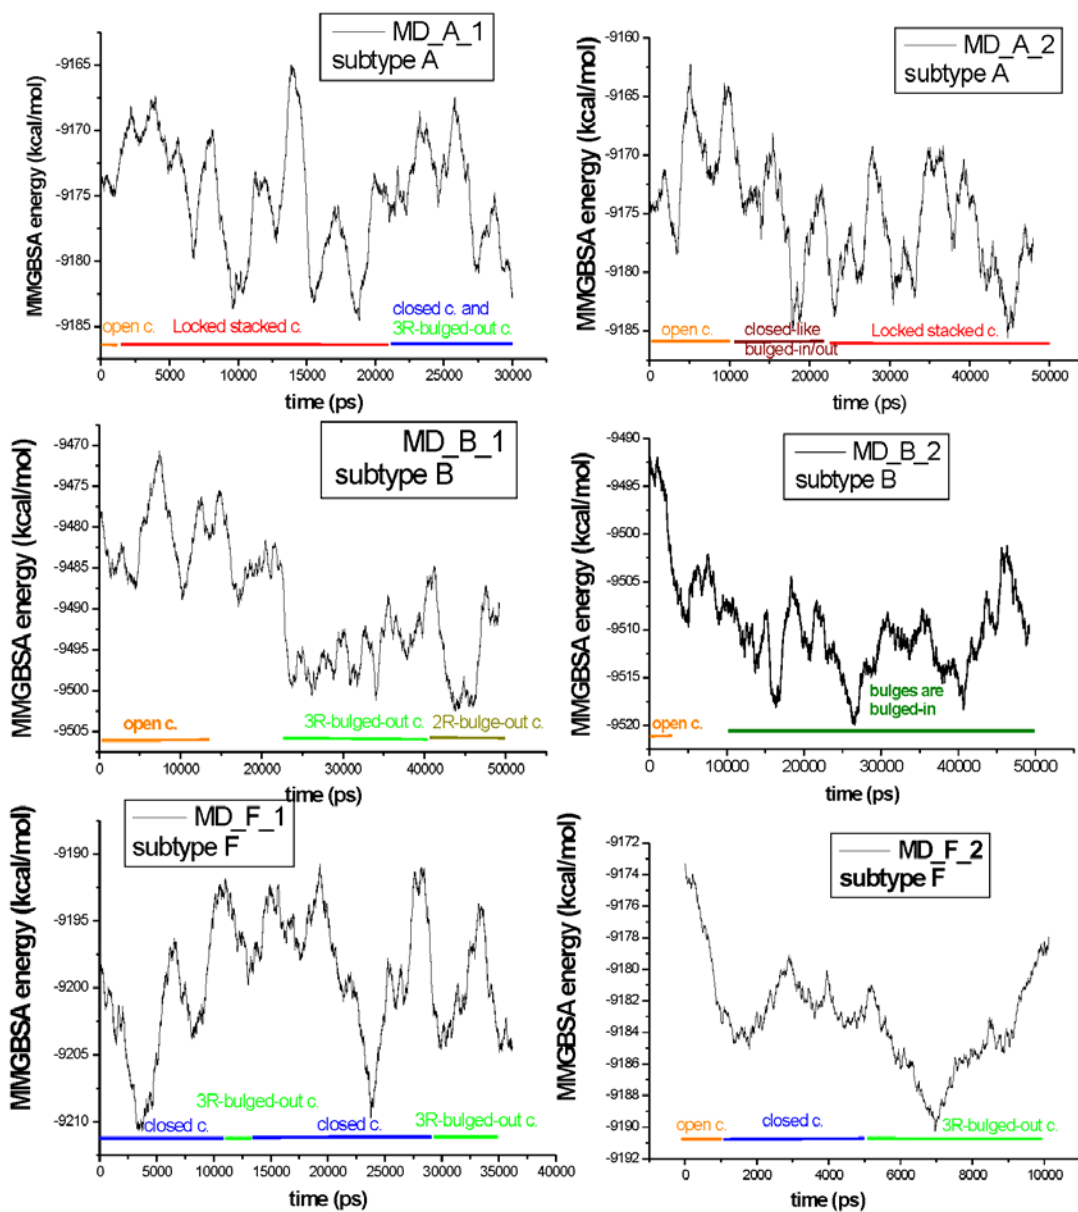

**Figure S3** Time course of total MM-GBSA free energy calculated for subtype A, B and F in simulations MD\_A\_1-2, MD\_B\_1-2 and MD\_F\_1-2. The developments were

averaged over 300 steps. The horizontal line in each graph corresponds to time scale and indicates observed flanking base conformations in the given time periods.

## REFERENCES

1. Ennifar, E., and P. Dumas. 2006. Polymorphism of bulged-out residues in HIV-1 RNA DIS kissing complex and structure comparison with solution studies. *J. Mol. Biol.* 356:771-782.
2. Kollman, P. A., I. Massova, C. Reyes, B. Kuhn, S. Huo, L. Chong, M. Lee, T. Lee, Y. Duan, W. Wang, O. Donini, P. Cieplak, J. Srinivasan, D. A. Case, and T. E. Cheatham III. 2000. Calculating structures and free energies of complex molecules: Combining molecular mechanics and continuum models. *Acc. Chem. Res.* 33:889-897.
3. Case, D. A., T. A. Darden, T. E. Cheatham III, C. L. Simmerling, J. Wang, R. E. Duke, R. Luo, K. M. Merz, B. Wang, D. A. Pearlman, M. Crowley, S. Brozell, V. Tsui, H. Gohlke, J. Mongan, V. Hornak, G. Cui, P. Beroza, C. Schafmeister, J. W. Caldwell, W. S. Ross, and P. A. Kollman. 2004. AMBER 8. University of California, San Francisco.
4. Pearlman, D. A., D. A. Case, J. W. Caldwell, W. S. Ross, T. E. Cheatham III, and S. DeBolt. 1995. AMBER, a package of computer programs for applying molecular mechanics, normal mode analysis, molecular dynamics and free energy calculations to simulate the structural and energetic properties of molecule. *Comput. Phys. Commun.* 91:1-41.
5. Cheatham III, T. E., P. Cieplak, and P. A. Kollman. 1999. A modified version of the Cornell et al. force field with improved sugar pucker phases and helical repeat. *J. Biomol. Struct. Dyn.* 16:845-862.
6. Jayaram, B., D. Sprous, and D. L. Beveridge. 1998. Solvation free energy of biomacromolecules: Parameters for a modified generalized born model consistent with the AMBER force field. *J. Phys. Chem. B.* 102:9571-9576.
7. Sanner, M. F., A. J. Olson, and J. C. Spehner. 1998. Reduced surface: an efficient way to compute molecular surfaces. *Biopolymers.* 38:305-320.

# locked stacked conformation - locked\_stacked\_c.pdb

REMARK MD average structure 3000 - 3100 ps

REMARK 1XPF (PDB database)

REMARK sequence chain I. residues 1-23 5'(CUUGCUGAGGUGCACACAGCAAG)3'

REMARK sequence chain II. residues 24-46 5'(CUUGCUGAGGUGCACACAGCAAG)3'

REMARK PDB format: output from Ptraj module of AMBER-8.0

|      |    |      |     |   |         |        |         |      |      |
|------|----|------|-----|---|---------|--------|---------|------|------|
| ATOM | 1  | H5T  | RC5 | 1 | -11.726 | 23.715 | -3.367  | 0.00 | 0.00 |
| ATOM | 2  | O5'  | RC5 | 1 | -11.378 | 23.791 | -3.826  | 0.00 | 0.00 |
| ATOM | 3  | C5'  | RC5 | 1 | -11.816 | 24.245 | -5.050  | 0.00 | 0.00 |
| ATOM | 4  | 1H5' | RC5 | 1 | -12.713 | 24.779 | -4.912  | 0.00 | 0.00 |
| ATOM | 5  | 2H5' | RC5 | 1 | -12.038 | 23.419 | -5.662  | 0.00 | 0.00 |
| ATOM | 6  | C4'  | RC5 | 1 | -10.836 | 25.123 | -5.750  | 0.00 | 0.00 |
| ATOM | 7  | H4'  | RC5 | 1 | -11.253 | 25.374 | -6.694  | 0.00 | 0.00 |
| ATOM | 8  | O4'  | RC5 | 1 | -10.598 | 26.304 | -5.048  | 0.00 | 0.00 |
| ATOM | 9  | C1'  | RC5 | 1 | -9.283  | 26.729 | -5.293  | 0.00 | 0.00 |
| ATOM | 10 | H1'  | RC5 | 1 | -9.304  | 27.666 | -5.803  | 0.00 | 0.00 |
| ATOM | 11 | N1   | RC5 | 1 | -8.515  | 26.899 | -4.045  | 0.00 | 0.00 |
| ATOM | 12 | C6   | RC5 | 1 | -8.835  | 26.254 | -2.904  | 0.00 | 0.00 |
| ATOM | 13 | H6   | RC5 | 1 | -9.644  | 25.589 | -2.904  | 0.00 | 0.00 |
| ATOM | 14 | C5   | RC5 | 1 | -8.161  | 26.491 | -1.774  | 0.00 | 0.00 |
| ATOM | 15 | H5   | RC5 | 1 | -8.427  | 26.002 | -0.881  | 0.00 | 0.00 |
| ATOM | 16 | C4   | RC5 | 1 | -7.122  | 27.403 | -1.812  | 0.00 | 0.00 |
| ATOM | 17 | N4   | RC5 | 1 | -6.462  | 27.696 | -0.747  | 0.00 | 0.00 |
| ATOM | 18 | H41  | RC5 | 1 | -5.729  | 28.334 | -0.824  | 0.00 | 0.00 |
| ATOM | 19 | H42  | RC5 | 1 | -6.670  | 27.259 | 0.095   | 0.00 | 0.00 |
| ATOM | 20 | N3   | RC5 | 1 | -6.782  | 28.006 | -2.899  | 0.00 | 0.00 |
| ATOM | 21 | C2   | RC5 | 1 | -7.452  | 27.758 | -4.030  | 0.00 | 0.00 |
| ATOM | 22 | O2   | RC5 | 1 | -7.077  | 28.302 | -5.031  | 0.00 | 0.00 |
| ATOM | 23 | C3'  | RC5 | 1 | -9.499  | 24.481 | -5.989  | 0.00 | 0.00 |
| ATOM | 24 | H3'  | RC5 | 1 | -9.178  | 24.009 | -5.091  | 0.00 | 0.00 |
| ATOM | 25 | C2'  | RC5 | 1 | -8.669  | 25.707 | -6.214  | 0.00 | 0.00 |
| ATOM | 26 | 1H2' | RC5 | 1 | -7.661  | 25.535 | -5.952  | 0.00 | 0.00 |
| ATOM | 27 | O2'  | RC5 | 1 | -8.776  | 26.171 | -7.514  | 0.00 | 0.00 |
| ATOM | 28 | 2HO' | RC5 | 1 | -8.956  | 25.585 | -8.005  | 0.00 | 0.00 |
| ATOM | 29 | O3'  | RC5 | 1 | -9.507  | 23.593 | -7.071  | 0.00 | 0.00 |
| ATOM | 30 | P    | RU  | 2 | -8.456  | 22.452 | -7.197  | 0.00 | 0.00 |
| ATOM | 31 | O1P  | RU  | 2 | -8.802  | 21.663 | -8.362  | 0.00 | 0.00 |
| ATOM | 32 | O2P  | RU  | 2 | -8.348  | 21.793 | -5.911  | 0.00 | 0.00 |
| ATOM | 33 | O5'  | RU  | 2 | -7.097  | 23.162 | -7.482  | 0.00 | 0.00 |
| ATOM | 34 | C5'  | RU  | 2 | -6.760  | 23.646 | -8.754  | 0.00 | 0.00 |
| ATOM | 35 | 1H5' | RU  | 2 | -7.513  | 24.301 | -9.116  | 0.00 | 0.00 |
| ATOM | 36 | 2H5' | RU  | 2 | -6.675  | 22.828 | -9.433  | 0.00 | 0.00 |
| ATOM | 37 | C4'  | RU  | 2 | -5.449  | 24.400 | -8.724  | 0.00 | 0.00 |
| ATOM | 38 | H4'  | RU  | 2 | -5.251  | 24.799 | -9.703  | 0.00 | 0.00 |
| ATOM | 39 | O4'  | RU  | 2 | -5.490  | 25.477 | -7.808  | 0.00 | 0.00 |
| ATOM | 40 | C1'  | RU  | 2 | -4.210  | 25.647 | -7.250  | 0.00 | 0.00 |
| ATOM | 41 | H1'  | RU  | 2 | -3.856  | 26.628 | -7.502  | 0.00 | 0.00 |
| ATOM | 42 | N1   | RU  | 2 | -4.210  | 25.518 | -5.770  | 0.00 | 0.00 |
| ATOM | 43 | C6   | RU  | 2 | -5.136  | 24.791 | -5.093  | 0.00 | 0.00 |
| ATOM | 44 | H6   | RU  | 2 | -5.840  | 24.226 | -5.646  | 0.00 | 0.00 |
| ATOM | 45 | C5   | RU  | 2 | -5.186  | 24.787 | -3.746  | 0.00 | 0.00 |
| ATOM | 46 | H5   | RU  | 2 | -5.915  | 24.223 | -3.234  | 0.00 | 0.00 |
| ATOM | 47 | C4   | RU  | 2 | -4.256  | 25.530 | -2.965  | 0.00 | 0.00 |
| ATOM | 48 | O4   | RU  | 2 | -4.232  | 25.599 | -1.751  | 0.00 | 0.00 |
| ATOM | 49 | N3   | RU  | 2 | -3.329  | 26.179 | -3.698  | 0.00 | 0.00 |
| ATOM | 50 | H3   | RU  | 2 | -2.639  | 26.667 | -3.193  | 0.00 | 0.00 |
| ATOM | 51 | C2   | RU  | 2 | -3.225  | 26.176 | -5.064  | 0.00 | 0.00 |
| ATOM | 52 | O2   | RU  | 2 | -2.293  | 26.723 | -5.594  | 0.00 | 0.00 |
| ATOM | 53 | C3'  | RU  | 2 | -4.273  | 23.546 | -8.316  | 0.00 | 0.00 |
| ATOM | 54 | H3'  | RU  | 2 | -4.551  | 22.972 | -7.451  | 0.00 | 0.00 |
| ATOM | 55 | C2'  | RU  | 2 | -3.306  | 24.632 | -7.911  | 0.00 | 0.00 |
| ATOM | 56 | 1H2' | RU  | 2 | -2.575  | 24.262 | -7.220  | 0.00 | 0.00 |
| ATOM | 57 | O2'  | RU  | 2 | -2.679  | 25.236 | -9.011  | 0.00 | 0.00 |
| ATOM | 58 | 2HO' | RU  | 2 | -2.286  | 24.967 | -9.294  | 0.00 | 0.00 |
| ATOM | 59 | O3'  | RU  | 2 | -3.800  | 22.721 | -9.341  | 0.00 | 0.00 |
| ATOM | 60 | P    | RU  | 3 | -2.948  | 21.453 | -9.010  | 0.00 | 0.00 |
| ATOM | 61 | O1P  | RU  | 3 | -2.679  | 20.777 | -10.271 | 0.00 | 0.00 |

|      |     |      |    |   |        |        |        |      |      |
|------|-----|------|----|---|--------|--------|--------|------|------|
| ATOM | 62  | O2P  | RU | 3 | -3.607 | 20.721 | -7.941 | 0.00 | 0.00 |
| ATOM | 63  | O5'  | RU | 3 | -1.587 | 21.986 | -8.438 | 0.00 | 0.00 |
| ATOM | 64  | C5'  | RU | 3 | -0.622 | 22.551 | -9.274 | 0.00 | 0.00 |
| ATOM | 65  | 1H5' | RU | 3 | -1.065 | 23.309 | -9.886 | 0.00 | 0.00 |
| ATOM | 66  | 2H5' | RU | 3 | -0.221 | 21.801 | -9.920 | 0.00 | 0.00 |
| ATOM | 67  | C4'  | RU | 3 | 0.504  | 23.162 | -8.472 | 0.00 | 0.00 |
| ATOM | 68  | H4'  | RU | 3 | 1.202  | 23.585 | -9.166 | 0.00 | 0.00 |
| ATOM | 69  | O4'  | RU | 3 | 0.056  | 24.179 | -7.601 | 0.00 | 0.00 |
| ATOM | 70  | C1'  | RU | 3 | 0.866  | 24.201 | -6.435 | 0.00 | 0.00 |
| ATOM | 71  | H1'  | RU | 3 | 1.330  | 25.163 | -6.340 | 0.00 | 0.00 |
| ATOM | 72  | N1   | RU | 3 | 0.091  | 23.934 | -5.199 | 0.00 | 0.00 |
| ATOM | 73  | C6   | RU | 3 | -1.019 | 23.153 | -5.196 | 0.00 | 0.00 |
| ATOM | 74  | H6   | RU | 3 | -1.350 | 22.698 | -6.098 | 0.00 | 0.00 |
| ATOM | 75  | C5   | RU | 3 | -1.706 | 22.947 | -4.057 | 0.00 | 0.00 |
| ATOM | 76  | H5   | RU | 3 | -2.572 | 22.344 | -4.059 | 0.00 | 0.00 |
| ATOM | 77  | C4   | RU | 3 | -1.296 | 23.510 | -2.812 | 0.00 | 0.00 |
| ATOM | 78  | O4   | RU | 3 | -1.872 | 23.394 | -1.754 | 0.00 | 0.00 |
| ATOM | 79  | N3   | RU | 3 | -0.169 | 24.246 | -2.884 | 0.00 | 0.00 |
| ATOM | 80  | H3   | RU | 3 | 0.182  | 24.596 | -2.026 | 0.00 | 0.00 |
| ATOM | 81  | C2   | RU | 3 | 0.562  | 24.468 | -4.013 | 0.00 | 0.00 |
| ATOM | 82  | O2   | RU | 3 | 1.578  | 25.106 | -3.934 | 0.00 | 0.00 |
| ATOM | 83  | C3'  | RU | 3 | 1.250  | 22.193 | -7.580 | 0.00 | 0.00 |
| ATOM | 84  | H3'  | RU | 3 | 0.544  | 21.598 | -7.030 | 0.00 | 0.00 |
| ATOM | 85  | C2'  | RU | 3 | 1.934  | 23.154 | -6.640 | 0.00 | 0.00 |
| ATOM | 86  | 1H2' | RU | 3 | 2.209  | 22.677 | -5.715 | 0.00 | 0.00 |
| ATOM | 87  | O2'  | RU | 3 | 3.045  | 23.764 | -7.229 | 0.00 | 0.00 |
| ATOM | 88  | 2HO' | RU | 3 | 3.430  | 23.229 | -7.701 | 0.00 | 0.00 |
| ATOM | 89  | O3'  | RU | 3 | 2.149  | 21.378 | -8.282 | 0.00 | 0.00 |
| ATOM | 90  | P    | RG | 4 | 2.591  | 19.989 | -7.711 | 0.00 | 0.00 |
| ATOM | 91  | O1P  | RG | 4 | 3.462  | 19.375 | -8.688 | 0.00 | 0.00 |
| ATOM | 92  | O2P  | RG | 4 | 1.405  | 19.282 | -7.292 | 0.00 | 0.00 |
| ATOM | 93  | O5'  | RG | 4 | 3.439  | 20.304 | -6.424 | 0.00 | 0.00 |
| ATOM | 94  | C5'  | RG | 4 | 4.741  | 20.790 | -6.506 | 0.00 | 0.00 |
| ATOM | 95  | 1H5' | RG | 4 | 4.768  | 21.642 | -7.144 | 0.00 | 0.00 |
| ATOM | 96  | 2H5' | RG | 4 | 5.377  | 20.043 | -6.925 | 0.00 | 0.00 |
| ATOM | 97  | C4'  | RG | 4 | 5.305  | 21.179 | -5.155 | 0.00 | 0.00 |
| ATOM | 98  | H4'  | RG | 4 | 6.294  | 21.565 | -5.317 | 0.00 | 0.00 |
| ATOM | 99  | O4'  | RG | 4 | 4.531  | 22.176 | -4.530 | 0.00 | 0.00 |
| ATOM | 100 | C1'  | RG | 4 | 4.609  | 21.986 | -3.132 | 0.00 | 0.00 |
| ATOM | 101 | H1'  | RG | 4 | 4.973  | 22.875 | -2.649 | 0.00 | 0.00 |
| ATOM | 102 | N9   | RG | 4 | 3.278  | 21.680 | -2.574 | 0.00 | 0.00 |
| ATOM | 103 | C8   | RG | 4 | 2.169  | 21.227 | -3.206 | 0.00 | 0.00 |
| ATOM | 104 | H8   | RG | 4 | 2.147  | 20.988 | -4.245 | 0.00 | 0.00 |
| ATOM | 105 | N7   | RG | 4 | 1.136  | 21.081 | -2.431 | 0.00 | 0.00 |
| ATOM | 106 | C5   | RG | 4 | 1.611  | 21.432 | -1.177 | 0.00 | 0.00 |
| ATOM | 107 | C6   | RG | 4 | 0.987  | 21.446 | 0.108  | 0.00 | 0.00 |
| ATOM | 108 | O6   | RG | 4 | -0.163 | 21.193 | 0.423  | 0.00 | 0.00 |
| ATOM | 109 | N1   | RG | 4 | 1.845  | 21.778 | 1.116  | 0.00 | 0.00 |
| ATOM | 110 | H1   | RG | 4 | 1.483  | 21.775 | 2.041  | 0.00 | 0.00 |
| ATOM | 111 | C2   | RG | 4 | 3.132  | 22.101 | 0.936  | 0.00 | 0.00 |
| ATOM | 112 | N2   | RG | 4 | 3.821  | 22.352 | 1.999  | 0.00 | 0.00 |
| ATOM | 113 | H21  | RG | 4 | 3.395  | 22.302 | 2.893  | 0.00 | 0.00 |
| ATOM | 114 | H22  | RG | 4 | 4.769  | 22.603 | 1.889  | 0.00 | 0.00 |
| ATOM | 115 | N3   | RG | 4 | 3.747  | 22.132 | -0.231 | 0.00 | 0.00 |
| ATOM | 116 | C4   | RG | 4 | 2.933  | 21.778 | -1.254 | 0.00 | 0.00 |
| ATOM | 117 | C3'  | RG | 4 | 5.420  | 20.038 | -4.154 | 0.00 | 0.00 |
| ATOM | 118 | H3'  | RG | 4 | 4.485  | 19.509 | -4.134 | 0.00 | 0.00 |
| ATOM | 119 | C2'  | RG | 4 | 5.570  | 20.841 | -2.880 | 0.00 | 0.00 |
| ATOM | 120 | 1H2' | RG | 4 | 5.290  | 20.263 | -2.019 | 0.00 | 0.00 |
| ATOM | 121 | O2'  | RG | 4 | 6.859  | 21.370 | -2.721 | 0.00 | 0.00 |
| ATOM | 122 | 2HO' | RG | 4 | 7.163  | 21.242 | -2.453 | 0.00 | 0.00 |
| ATOM | 123 | O3'  | RG | 4 | 6.499  | 19.171 | -4.399 | 0.00 | 0.00 |
| ATOM | 124 | P    | RC | 5 | 6.518  | 17.699 | -3.864 | 0.00 | 0.00 |
| ATOM | 125 | O1P  | RC | 5 | 7.734  | 17.059 | -4.338 | 0.00 | 0.00 |
| ATOM | 126 | O2P  | RC | 5 | 5.235  | 17.104 | -4.171 | 0.00 | 0.00 |
| ATOM | 127 | O5'  | RC | 5 | 6.624  | 17.805 | -2.304 | 0.00 | 0.00 |
| ATOM | 128 | C5'  | RC | 5 | 7.797  | 18.231 | -1.675 | 0.00 | 0.00 |
| ATOM | 129 | 1H5' | RC | 5 | 8.126  | 19.148 | -2.112 | 0.00 | 0.00 |

|      |     |      |    |   |       |        |        |      |      |
|------|-----|------|----|---|-------|--------|--------|------|------|
| ATOM | 130 | 2H5' | RC | 5 | 8.570 | 17.501 | -1.800 | 0.00 | 0.00 |
| ATOM | 131 | C4'  | RC | 5 | 7.590 | 18.454 | -0.194 | 0.00 | 0.00 |
| ATOM | 132 | H4'  | RC | 5 | 8.511 | 18.820 | 0.211  | 0.00 | 0.00 |
| ATOM | 133 | O4'  | RC | 5 | 6.574 | 19.397 | 0.083  | 0.00 | 0.00 |
| ATOM | 134 | C1'  | RC | 5 | 5.913 | 19.037 | 1.277  | 0.00 | 0.00 |
| ATOM | 135 | H1'  | RC | 5 | 5.986 | 19.844 | 1.979  | 0.00 | 0.00 |
| ATOM | 136 | N1   | RC | 5 | 4.477 | 18.731 | 1.068  | 0.00 | 0.00 |
| ATOM | 137 | C6   | RC | 5 | 3.969 | 18.391 | -0.141 | 0.00 | 0.00 |
| ATOM | 138 | H6   | RC | 5 | 4.622 | 18.319 | -0.976 | 0.00 | 0.00 |
| ATOM | 139 | C5   | RC | 5 | 2.657 | 18.158 | -0.293 | 0.00 | 0.00 |
| ATOM | 140 | H5   | RC | 5 | 2.270 | 17.920 | -1.254 | 0.00 | 0.00 |
| ATOM | 141 | C4   | RC | 5 | 1.848 | 18.243 | 0.840  | 0.00 | 0.00 |
| ATOM | 142 | N4   | RC | 5 | 0.585 | 18.040 | 0.745  | 0.00 | 0.00 |
| ATOM | 143 | H41  | RC | 5 | 0.056 | 18.151 | 1.563  | 0.00 | 0.00 |
| ATOM | 144 | H42  | RC | 5 | 0.190 | 17.850 | -0.127 | 0.00 | 0.00 |
| ATOM | 145 | N3   | RC | 5 | 2.313 | 18.527 | 2.020  | 0.00 | 0.00 |
| ATOM | 146 | C2   | RC | 5 | 3.625 | 18.768 | 2.159  | 0.00 | 0.00 |
| ATOM | 147 | O2   | RC | 5 | 4.037 | 18.985 | 3.279  | 0.00 | 0.00 |
| ATOM | 148 | C3'  | RC | 5 | 7.245 | 17.212 | 0.585  | 0.00 | 0.00 |
| ATOM | 149 | H3'  | RC | 5 | 6.474 | 16.688 | 0.060  | 0.00 | 0.00 |
| ATOM | 150 | C2'  | RC | 5 | 6.664 | 17.838 | 1.829  | 0.00 | 0.00 |
| ATOM | 151 | 1H2' | RC | 5 | 6.018 | 17.157 | 2.339  | 0.00 | 0.00 |
| ATOM | 152 | O2'  | RC | 5 | 7.648 | 18.310 | 2.694  | 0.00 | 0.00 |
| ATOM | 153 | 2HO' | RC | 5 | 8.210 | 17.901 | 2.696  | 0.00 | 0.00 |
| ATOM | 154 | O3'  | RC | 5 | 8.353 | 16.385 | 0.856  | 0.00 | 0.00 |
| ATOM | 155 | P    | RU | 6 | 8.184 | 14.860 | 1.189  | 0.00 | 0.00 |
| ATOM | 156 | O1P  | RU | 6 | 9.521 | 14.306 | 1.359  | 0.00 | 0.00 |
| ATOM | 157 | O2P  | RU | 6 | 7.303 | 14.272 | 0.190  | 0.00 | 0.00 |
| ATOM | 158 | O5'  | RU | 6 | 7.444 | 14.801 | 2.571  | 0.00 | 0.00 |
| ATOM | 159 | C5'  | RU | 6 | 8.102 | 15.104 | 3.767  | 0.00 | 0.00 |
| ATOM | 160 | 1H5' | RU | 6 | 8.523 | 16.086 | 3.707  | 0.00 | 0.00 |
| ATOM | 161 | 2H5' | RU | 6 | 8.902 | 14.404 | 3.929  | 0.00 | 0.00 |
| ATOM | 162 | C4'  | RU | 6 | 7.154 | 15.059 | 4.949  | 0.00 | 0.00 |
| ATOM | 163 | H4'  | RU | 6 | 7.723 | 15.311 | 5.827  | 0.00 | 0.00 |
| ATOM | 164 | O4'  | RU | 6 | 6.091 | 15.986 | 4.835  | 0.00 | 0.00 |
| ATOM | 165 | C1'  | RU | 6 | 4.939 | 15.436 | 5.447  | 0.00 | 0.00 |
| ATOM | 166 | H1'  | RU | 6 | 4.626 | 16.090 | 6.245  | 0.00 | 0.00 |
| ATOM | 167 | N1   | RU | 6 | 3.808 | 15.290 | 4.495  | 0.00 | 0.00 |
| ATOM | 168 | C6   | RU | 6 | 4.001 | 15.197 | 3.145  | 0.00 | 0.00 |
| ATOM | 169 | H6   | RU | 6 | 4.994 | 15.169 | 2.751  | 0.00 | 0.00 |
| ATOM | 170 | C5   | RU | 6 | 2.956 | 15.155 | 2.303  | 0.00 | 0.00 |
| ATOM | 171 | H5   | RU | 6 | 3.129 | 15.101 | 1.251  | 0.00 | 0.00 |
| ATOM | 172 | C4   | RU | 6 | 1.602 | 15.188 | 2.781  | 0.00 | 0.00 |
| ATOM | 173 | O4   | RU | 6 | 0.605 | 15.153 | 2.091  | 0.00 | 0.00 |
| ATOM | 174 | N3   | RU | 6 | 1.487 | 15.252 | 4.131  | 0.00 | 0.00 |
| ATOM | 175 | H3   | RU | 6 | 0.563 | 15.240 | 4.505  | 0.00 | 0.00 |
| ATOM | 176 | C2   | RU | 6 | 2.518 | 15.272 | 5.023  | 0.00 | 0.00 |
| ATOM | 177 | O2   | RU | 6 | 2.272 | 15.278 | 6.216  | 0.00 | 0.00 |
| ATOM | 178 | C3'  | RU | 6 | 6.524 | 13.703 | 5.178  | 0.00 | 0.00 |
| ATOM | 179 | H3'  | RU | 6 | 6.166 | 13.319 | 4.242  | 0.00 | 0.00 |
| ATOM | 180 | C2'  | RU | 6 | 5.339 | 14.096 | 6.048  | 0.00 | 0.00 |
| ATOM | 181 | 1H2' | RU | 6 | 4.547 | 13.370 | 5.981  | 0.00 | 0.00 |
| ATOM | 182 | O2'  | RU | 6 | 5.707 | 14.316 | 7.390  | 0.00 | 0.00 |
| ATOM | 183 | 2HO' | RU | 6 | 6.023 | 13.922 | 7.676  | 0.00 | 0.00 |
| ATOM | 184 | O3'  | RU | 6 | 7.403 | 12.804 | 5.800  | 0.00 | 0.00 |
| ATOM | 185 | P    | RG | 7 | 7.297 | 11.258 | 5.585  | 0.00 | 0.00 |
| ATOM | 186 | O1P  | RG | 7 | 8.368 | 10.630 | 6.320  | 0.00 | 0.00 |
| ATOM | 187 | O2P  | RG | 7 | 7.180 | 11.006 | 4.176  | 0.00 | 0.00 |
| ATOM | 188 | O5'  | RG | 7 | 5.946 | 10.841 | 6.250  | 0.00 | 0.00 |
| ATOM | 189 | C5'  | RG | 7 | 5.779 | 10.840 | 7.633  | 0.00 | 0.00 |
| ATOM | 190 | 1H5' | RG | 7 | 5.968 | 11.816 | 8.013  | 0.00 | 0.00 |
| ATOM | 191 | 2H5' | RG | 7 | 6.475 | 10.174 | 8.085  | 0.00 | 0.00 |
| ATOM | 192 | C4'  | RG | 7 | 4.390 | 10.433 | 8.050  | 0.00 | 0.00 |
| ATOM | 193 | H4'  | RG | 7 | 4.324 | 10.544 | 9.115  | 0.00 | 0.00 |
| ATOM | 194 | O4'  | RG | 7 | 3.434 | 11.277 | 7.441  | 0.00 | 0.00 |
| ATOM | 195 | C1'  | RG | 7 | 2.504 | 10.477 | 6.757  | 0.00 | 0.00 |
| ATOM | 196 | H1'  | RG | 7 | 1.689 | 10.230 | 7.412  | 0.00 | 0.00 |
| ATOM | 197 | N9   | RG | 7 | 1.970 | 11.142 | 5.559  | 0.00 | 0.00 |

|      |     |      |    |   |        |        |        |      |      |
|------|-----|------|----|---|--------|--------|--------|------|------|
| ATOM | 198 | C8   | RG | 7 | 2.610  | 11.454 | 4.392  | 0.00 | 0.00 |
| ATOM | 199 | H8   | RG | 7 | 3.666  | 11.354 | 4.281  | 0.00 | 0.00 |
| ATOM | 200 | N7   | RG | 7 | 1.824  | 11.845 | 3.442  | 0.00 | 0.00 |
| ATOM | 201 | C5   | RG | 7 | 0.557  | 11.807 | 4.021  | 0.00 | 0.00 |
| ATOM | 202 | C6   | RG | 7 | -0.747 | 12.057 | 3.487  | 0.00 | 0.00 |
| ATOM | 203 | O6   | RG | 7 | -1.076 | 12.384 | 2.360  | 0.00 | 0.00 |
| ATOM | 204 | N1   | RG | 7 | -1.750 | 11.865 | 4.392  | 0.00 | 0.00 |
| ATOM | 205 | H1   | RG | 7 | -2.687 | 12.006 | 4.090  | 0.00 | 0.00 |
| ATOM | 206 | C2   | RG | 7 | -1.542 | 11.510 | 5.668  | 0.00 | 0.00 |
| ATOM | 207 | N2   | RG | 7 | -2.583 | 11.401 | 6.414  | 0.00 | 0.00 |
| ATOM | 208 | H21  | RG | 7 | -3.493 | 11.549 | 6.055  | 0.00 | 0.00 |
| ATOM | 209 | H22  | RG | 7 | -2.438 | 11.149 | 7.347  | 0.00 | 0.00 |
| ATOM | 210 | N3   | RG | 7 | -0.360 | 11.265 | 6.212  | 0.00 | 0.00 |
| ATOM | 211 | C4   | RG | 7 | 0.655  | 11.418 | 5.328  | 0.00 | 0.00 |
| ATOM | 212 | C3'  | RG | 7 | 4.062  | 8.999  | 7.681  | 0.00 | 0.00 |
| ATOM | 213 | H3'  | RG | 7 | 4.945  | 8.430  | 7.462  | 0.00 | 0.00 |
| ATOM | 214 | C2'  | RG | 7 | 3.229  | 9.189  | 6.427  | 0.00 | 0.00 |
| ATOM | 215 | 1H2' | RG | 7 | 3.883  | 9.348  | 5.593  | 0.00 | 0.00 |
| ATOM | 216 | O2'  | RG | 7 | 2.355  | 8.123  | 6.192  | 0.00 | 0.00 |
| ATOM | 217 | 2HO' | RG | 7 | 2.343  | 7.672  | 6.682  | 0.00 | 0.00 |
| ATOM | 218 | O3'  | RG | 7 | 3.295  | 8.382  | 8.684  | 0.00 | 0.00 |
| ATOM | 219 | P    | RA | 8 | 3.933  | 7.721  | 9.958  | 0.00 | 0.00 |
| ATOM | 220 | O1P  | RA | 8 | 2.935  | 7.759  | 10.986 | 0.00 | 0.00 |
| ATOM | 221 | O2P  | RA | 8 | 5.214  | 8.309  | 10.221 | 0.00 | 0.00 |
| ATOM | 222 | O5'  | RA | 8 | 4.154  | 6.235  | 9.578  | 0.00 | 0.00 |
| ATOM | 223 | C5'  | RA | 8 | 5.009  | 5.761  | 8.758  | 0.00 | 0.00 |
| ATOM | 224 | 1H5' | RA | 8 | 5.799  | 6.179  | 8.929  | 0.00 | 0.00 |
| ATOM | 225 | 2H5' | RA | 8 | 4.722  | 6.055  | 7.940  | 0.00 | 0.00 |
| ATOM | 226 | C4'  | RA | 8 | 5.233  | 4.290  | 8.709  | 0.00 | 0.00 |
| ATOM | 227 | H4'  | RA | 8 | 5.806  | 4.071  | 7.850  | 0.00 | 0.00 |
| ATOM | 228 | O4'  | RA | 8 | 5.947  | 3.869  | 9.827  | 0.00 | 0.00 |
| ATOM | 229 | C1'  | RA | 8 | 5.391  | 2.716  | 10.373 | 0.00 | 0.00 |
| ATOM | 230 | H1'  | RA | 8 | 6.148  | 1.982  | 10.505 | 0.00 | 0.00 |
| ATOM | 231 | N9   | RA | 8 | 4.867  | 3.036  | 11.687 | 0.00 | 0.00 |
| ATOM | 232 | C8   | RA | 8 | 3.643  | 3.304  | 12.097 | 0.00 | 0.00 |
| ATOM | 233 | H8   | RA | 8 | 2.854  | 3.332  | 11.443 | 0.00 | 0.00 |
| ATOM | 234 | N7   | RA | 8 | 3.510  | 3.534  | 13.343 | 0.00 | 0.00 |
| ATOM | 235 | C5   | RA | 8 | 4.757  | 3.381  | 13.799 | 0.00 | 0.00 |
| ATOM | 236 | C6   | RA | 8 | 5.344  | 3.467  | 15.032 | 0.00 | 0.00 |
| ATOM | 237 | N6   | RA | 8 | 4.761  | 3.764  | 16.133 | 0.00 | 0.00 |
| ATOM | 238 | H61  | RA | 8 | 5.275  | 3.790  | 16.930 | 0.00 | 0.00 |
| ATOM | 239 | H62  | RA | 8 | 3.845  | 3.960  | 16.136 | 0.00 | 0.00 |
| ATOM | 240 | N1   | RA | 8 | 6.590  | 3.246  | 15.169 | 0.00 | 0.00 |
| ATOM | 241 | C2   | RA | 8 | 7.273  | 2.953  | 14.106 | 0.00 | 0.00 |
| ATOM | 242 | H2   | RA | 8 | 8.278  | 2.793  | 14.239 | 0.00 | 0.00 |
| ATOM | 243 | N3   | RA | 8 | 6.872  | 2.839  | 12.887 | 0.00 | 0.00 |
| ATOM | 244 | C4   | RA | 8 | 5.583  | 3.067  | 12.798 | 0.00 | 0.00 |
| ATOM | 245 | C3'  | RA | 8 | 3.953  | 3.470  | 8.656  | 0.00 | 0.00 |
| ATOM | 246 | H3'  | RA | 8 | 3.203  | 3.971  | 9.236  | 0.00 | 0.00 |
| ATOM | 247 | C2'  | RA | 8 | 4.385  | 2.200  | 9.368  | 0.00 | 0.00 |
| ATOM | 248 | 1H2' | RA | 8 | 3.556  | 1.730  | 9.851  | 0.00 | 0.00 |
| ATOM | 249 | O2'  | RA | 8 | 5.048  | 1.290  | 8.543  | 0.00 | 0.00 |
| ATOM | 250 | 2HO' | RA | 8 | 4.486  | 0.687  | 8.304  | 0.00 | 0.00 |
| ATOM | 251 | O3'  | RA | 8 | 3.507  | 3.282  | 7.342  | 0.00 | 0.00 |
| ATOM | 252 | P    | RG | 9 | 2.072  | 2.727  | 7.017  | 0.00 | 0.00 |
| ATOM | 253 | O1P  | RG | 9 | 1.830  | 2.948  | 5.601  | 0.00 | 0.00 |
| ATOM | 254 | O2P  | RG | 9 | 1.136  | 3.278  | 7.979  | 0.00 | 0.00 |
| ATOM | 255 | O5'  | RG | 9 | 2.168  | 1.178  | 7.267  | 0.00 | 0.00 |
| ATOM | 256 | C5'  | RG | 9 | 2.832  | 0.319  | 6.379  | 0.00 | 0.00 |
| ATOM | 257 | 1H5' | RG | 9 | 3.831  | 0.666  | 6.213  | 0.00 | 0.00 |
| ATOM | 258 | 2H5' | RG | 9 | 2.314  | 0.314  | 5.444  | 0.00 | 0.00 |
| ATOM | 259 | C4'  | RG | 9 | 2.896  | -1.110 | 6.898  | 0.00 | 0.00 |
| ATOM | 260 | H4'  | RG | 9 | 3.451  | -1.683 | 6.178  | 0.00 | 0.00 |
| ATOM | 261 | O4'  | RG | 9 | 3.572  | -1.141 | 8.134  | 0.00 | 0.00 |
| ATOM | 262 | C1'  | RG | 9 | 2.728  | -1.699 | 9.117  | 0.00 | 0.00 |
| ATOM | 263 | H1'  | RG | 9 | 2.918  | -2.756 | 9.168  | 0.00 | 0.00 |
| ATOM | 264 | N9   | RG | 9 | 2.958  | -1.115 | 10.447 | 0.00 | 0.00 |
| ATOM | 265 | C8   | RG | 9 | 2.083  | -0.630 | 11.332 | 0.00 | 0.00 |



|      |     |      |    |    |        |        |        |      |      |
|------|-----|------|----|----|--------|--------|--------|------|------|
| ATOM | 266 | H8   | RG | 9  | 1.060  | -0.560 | 11.119 | 0.00 | 0.00 |
| ATOM | 267 | N7   | RG | 9  | 2.597  | -0.270 | 12.462 | 0.00 | 0.00 |
| ATOM | 268 | C5   | RG | 9  | 3.914  | -0.557 | 12.331 | 0.00 | 0.00 |
| ATOM | 269 | C6   | RG | 9  | 4.989  | -0.420 | 13.230 | 0.00 | 0.00 |
| ATOM | 270 | O6   | RG | 9  | 5.002  | -0.022 | 14.361 | 0.00 | 0.00 |
| ATOM | 271 | N1   | RG | 9  | 6.149  | -0.807 | 12.716 | 0.00 | 0.00 |
| ATOM | 272 | H1   | RG | 9  | 6.935  | -0.730 | 13.287 | 0.00 | 0.00 |
| ATOM | 273 | C2   | RG | 9  | 6.278  | -1.288 | 11.489 | 0.00 | 0.00 |
| ATOM | 274 | N2   | RG | 9  | 7.429  | -1.591 | 11.128 | 0.00 | 0.00 |
| ATOM | 275 | H21  | RG | 9  | 8.179  | -1.476 | 11.750 | 0.00 | 0.00 |
| ATOM | 276 | H22  | RG | 9  | 7.534  | -1.887 | 10.212 | 0.00 | 0.00 |
| ATOM | 277 | N3   | RG | 9  | 5.313  | -1.451 | 10.625 | 0.00 | 0.00 |
| ATOM | 278 | C4   | RG | 9  | 4.139  | -1.065 | 11.102 | 0.00 | 0.00 |
| ATOM | 279 | C3'  | RG | 9  | 1.532  | -1.745 | 7.117  | 0.00 | 0.00 |
| ATOM | 280 | H3'  | RG | 9  | 0.780  | -1.251 | 6.534  | 0.00 | 0.00 |
| ATOM | 281 | C2'  | RG | 9  | 1.316  | -1.511 | 8.598  | 0.00 | 0.00 |
| ATOM | 282 | 1H2' | RG | 9  | 0.988  | -0.498 | 8.754  | 0.00 | 0.00 |
| ATOM | 283 | O2'  | RG | 9  | 0.413  | -2.450 | 9.121  | 0.00 | 0.00 |
| ATOM | 284 | 2HO' | RG | 9  | 0.573  | -3.234 | 8.654  | 0.00 | 0.00 |
| ATOM | 285 | O3'  | RG | 9  | 1.505  | -3.142 | 6.893  | 0.00 | 0.00 |
| ATOM | 286 | P    | RG | 10 | 1.529  | -3.766 | 5.445  | 0.00 | 0.00 |
| ATOM | 287 | O1P  | RG | 10 | 0.911  | -2.823 | 4.511  | 0.00 | 0.00 |
| ATOM | 288 | O2P  | RG | 10 | 0.983  | -5.118 | 5.541  | 0.00 | 0.00 |
| ATOM | 289 | O5'  | RG | 10 | 3.055  | -3.867 | 5.076  | 0.00 | 0.00 |
| ATOM | 290 | C5'  | RG | 10 | 3.991  | -4.507 | 5.910  | 0.00 | 0.00 |
| ATOM | 291 | 1H5' | RG | 10 | 3.597  | -5.444 | 6.259  | 0.00 | 0.00 |
| ATOM | 292 | 2H5' | RG | 10 | 4.185  | -3.895 | 6.768  | 0.00 | 0.00 |
| ATOM | 293 | C4'  | RG | 10 | 5.308  | -4.766 | 5.195  | 0.00 | 0.00 |
| ATOM | 294 | H4'  | RG | 10 | 6.064  | -4.927 | 5.949  | 0.00 | 0.00 |
| ATOM | 295 | O4'  | RG | 10 | 5.264  | -5.937 | 4.402  | 0.00 | 0.00 |
| ATOM | 296 | C1'  | RG | 10 | 5.793  | -5.663 | 3.120  | 0.00 | 0.00 |
| ATOM | 297 | H1'  | RG | 10 | 6.454  | -6.453 | 2.801  | 0.00 | 0.00 |
| ATOM | 298 | N9   | RG | 10 | 4.697  | -5.556 | 2.134  | 0.00 | 0.00 |
| ATOM | 299 | C8   | RG | 10 | 3.350  | -5.596 | 2.360  | 0.00 | 0.00 |
| ATOM | 300 | H8   | RG | 10 | 2.933  | -5.604 | 3.345  | 0.00 | 0.00 |
| ATOM | 301 | N7   | RG | 10 | 2.627  | -5.677 | 1.286  | 0.00 | 0.00 |
| ATOM | 302 | C5   | RG | 10 | 3.569  | -5.692 | 0.260  | 0.00 | 0.00 |
| ATOM | 303 | C6   | RG | 10 | 3.419  | -5.822 | -1.155 | 0.00 | 0.00 |
| ATOM | 304 | O6   | RG | 10 | 2.399  | -5.977 | -1.811 | 0.00 | 0.00 |
| ATOM | 305 | N1   | RG | 10 | 4.604  | -5.779 | -1.841 | 0.00 | 0.00 |
| ATOM | 306 | H1   | RG | 10 | 4.567  | -5.875 | -2.832 | 0.00 | 0.00 |
| ATOM | 307 | C2   | RG | 10 | 5.801  | -5.645 | -1.245 | 0.00 | 0.00 |
| ATOM | 308 | N2   | RG | 10 | 6.832  | -5.614 | -2.027 | 0.00 | 0.00 |
| ATOM | 309 | H21  | RG | 10 | 6.705  | -5.666 | -3.014 | 0.00 | 0.00 |
| ATOM | 310 | H22  | RG | 10 | 7.726  | -5.514 | -1.611 | 0.00 | 0.00 |
| ATOM | 311 | N3   | RG | 10 | 5.995  | -5.536 | 0.061  | 0.00 | 0.00 |
| ATOM | 312 | C4   | RG | 10 | 4.835  | -5.580 | 0.772  | 0.00 | 0.00 |
| ATOM | 313 | C3'  | RG | 10 | 5.791  | -3.619 | 4.321  | 0.00 | 0.00 |
| ATOM | 314 | H3'  | RG | 10 | 4.950  | -3.153 | 3.826  | 0.00 | 0.00 |
| ATOM | 315 | C2'  | RG | 10 | 6.594  | -4.376 | 3.273  | 0.00 | 0.00 |
| ATOM | 316 | 1H2' | RG | 10 | 6.642  | -3.840 | 2.341  | 0.00 | 0.00 |
| ATOM | 317 | O2'  | RG | 10 | 7.885  | -4.706 | 3.721  | 0.00 | 0.00 |
| ATOM | 318 | 2HO' | RG | 10 | 8.235  | -4.473 | 3.831  | 0.00 | 0.00 |
| ATOM | 319 | O3'  | RG | 10 | 6.553  | -2.681 | 5.047  | 0.00 | 0.00 |
| ATOM | 320 | P    | RU | 11 | 6.608  | -1.163 | 4.649  | 0.00 | 0.00 |
| ATOM | 321 | O1P  | RU | 11 | 7.404  | -0.473 | 5.658  | 0.00 | 0.00 |
| ATOM | 322 | O2P  | RU | 11 | 5.253  | -0.695 | 4.379  | 0.00 | 0.00 |
| ATOM | 323 | O5'  | RU | 11 | 7.365  | -1.112 | 3.279  | 0.00 | 0.00 |
| ATOM | 324 | C5'  | RU | 11 | 8.750  | -1.316 | 3.168  | 0.00 | 0.00 |
| ATOM | 325 | 1H5' | RU | 11 | 9.019  | -2.262 | 3.605  | 0.00 | 0.00 |
| ATOM | 326 | 2H5' | RU | 11 | 9.275  | -0.536 | 3.692  | 0.00 | 0.00 |
| ATOM | 327 | C4'  | RU | 11 | 9.173  | -1.304 | 1.700  | 0.00 | 0.00 |
| ATOM | 328 | H4'  | RU | 11 | 10.249 | -1.384 | 1.655  | 0.00 | 0.00 |
| ATOM | 329 | O4'  | RU | 11 | 8.626  | -2.383 | 0.963  | 0.00 | 0.00 |
| ATOM | 330 | C1'  | RU | 11 | 8.296  | -1.940 | -0.344 | 0.00 | 0.00 |
| ATOM | 331 | H1'  | RU | 11 | 8.793  | -2.568 | -1.066 | 0.00 | 0.00 |
| ATOM | 332 | N1   | RU | 11 | 6.839  | -2.004 | -0.616 | 0.00 | 0.00 |
| ATOM | 333 | C6   | RU | 11 | 5.909  | -1.951 | 0.395  | 0.00 | 0.00 |

|      |     |      |    |    |        |        |        |      |      |
|------|-----|------|----|----|--------|--------|--------|------|------|
| ATOM | 334 | H6   | RU | 11 | 6.238  | -1.788 | 1.397  | 0.00 | 0.00 |
| ATOM | 335 | C5   | RU | 11 | 4.598  | -2.149 | 0.155  | 0.00 | 0.00 |
| ATOM | 336 | H5   | RU | 11 | 3.888  | -2.112 | 0.953  | 0.00 | 0.00 |
| ATOM | 337 | C4   | RU | 11 | 4.115  | -2.393 | -1.166 | 0.00 | 0.00 |
| ATOM | 338 | O4   | RU | 11 | 2.959  | -2.629 | -1.452 | 0.00 | 0.00 |
| ATOM | 339 | N3   | RU | 11 | 5.072  | -2.363 | -2.135 | 0.00 | 0.00 |
| ATOM | 340 | H3   | RU | 11 | 4.771  | -2.489 | -3.072 | 0.00 | 0.00 |
| ATOM | 341 | C2   | RU | 11 | 6.410  | -2.173 | -1.925 | 0.00 | 0.00 |
| ATOM | 342 | O2   | RU | 11 | 7.165  | -2.135 | -2.873 | 0.00 | 0.00 |
| ATOM | 343 | C3'  | RU | 11 | 8.745  | -0.043 | 0.961  | 0.00 | 0.00 |
| ATOM | 344 | H3'  | RU | 11 | 7.718  | 0.192  | 1.188  | 0.00 | 0.00 |
| ATOM | 345 | C2'  | RU | 11 | 8.838  | -0.528 | -0.481 | 0.00 | 0.00 |
| ATOM | 346 | 1H2' | RU | 11 | 8.224  | 0.076  | -1.125 | 0.00 | 0.00 |
| ATOM | 347 | O2'  | RU | 11 | 10.160 | -0.580 | -0.959 | 0.00 | 0.00 |
| ATOM | 348 | 2HO' | RU | 11 | 10.429 | -0.220 | -1.147 | 0.00 | 0.00 |
| ATOM | 349 | O3'  | RU | 11 | 9.580  | 1.051  | 1.233  | 0.00 | 0.00 |
| ATOM | 350 | P    | RG | 12 | 9.036  | 2.523  | 1.186  | 0.00 | 0.00 |
| ATOM | 351 | O1P  | RG | 12 | 10.150 | 3.399  | 1.564  | 0.00 | 0.00 |
| ATOM | 352 | O2P  | RG | 12 | 7.794  | 2.575  | 1.941  | 0.00 | 0.00 |
| ATOM | 353 | O5'  | RG | 12 | 8.682  | 2.775  | -0.324 | 0.00 | 0.00 |
| ATOM | 354 | C5'  | RG | 12 | 9.692  | 3.020  | -1.275 | 0.00 | 0.00 |
| ATOM | 355 | 1H5' | RG | 12 | 10.427 | 2.238  | -1.244 | 0.00 | 0.00 |
| ATOM | 356 | 2H5' | RG | 12 | 10.178 | 3.952  | -1.050 | 0.00 | 0.00 |
| ATOM | 357 | C4'  | RG | 12 | 9.132  | 3.096  | -2.687 | 0.00 | 0.00 |
| ATOM | 358 | H4'  | RG | 12 | 9.945  | 3.329  | -3.357 | 0.00 | 0.00 |
| ATOM | 359 | O4'  | RG | 12 | 8.543  | 1.869  | -3.091 | 0.00 | 0.00 |
| ATOM | 360 | C1'  | RG | 12 | 7.436  | 2.151  | -3.930 | 0.00 | 0.00 |
| ATOM | 361 | H1'  | RG | 12 | 7.538  | 1.662  | -4.883 | 0.00 | 0.00 |
| ATOM | 362 | N9   | RG | 12 | 6.194  | 1.661  | -3.306 | 0.00 | 0.00 |
| ATOM | 363 | C8   | RG | 12 | 5.896  | 1.493  | -1.984 | 0.00 | 0.00 |
| ATOM | 364 | H8   | RG | 12 | 6.593  | 1.724  | -1.210 | 0.00 | 0.00 |
| ATOM | 365 | N7   | RG | 12 | 4.720  | 0.997  | -1.757 | 0.00 | 0.00 |
| ATOM | 366 | C5   | RG | 12 | 4.169  | 0.861  | -3.027 | 0.00 | 0.00 |
| ATOM | 367 | C6   | RG | 12 | 2.882  | 0.407  | -3.449 | 0.00 | 0.00 |
| ATOM | 368 | O6   | RG | 12 | 1.955  | -0.020 | -2.787 | 0.00 | 0.00 |
| ATOM | 369 | N1   | RG | 12 | 2.700  | 0.490  | -4.799 | 0.00 | 0.00 |
| ATOM | 370 | H1   | RG | 12 | 1.821  | 0.198  | -5.165 | 0.00 | 0.00 |
| ATOM | 371 | C2   | RG | 12 | 3.636  | 0.931  | -5.653 | 0.00 | 0.00 |
| ATOM | 372 | N2   | RG | 12 | 3.307  | 0.949  | -6.898 | 0.00 | 0.00 |
| ATOM | 373 | H21  | RG | 12 | 2.402  | 0.652  | -7.173 | 0.00 | 0.00 |
| ATOM | 374 | H22  | RG | 12 | 3.979  | 1.245  | -7.555 | 0.00 | 0.00 |
| ATOM | 375 | N3   | RG | 12 | 4.853  | 1.338  | -5.318 | 0.00 | 0.00 |
| ATOM | 376 | C4   | RG | 12 | 5.061  | 1.288  | -3.976 | 0.00 | 0.00 |
| ATOM | 377 | C3'  | RG | 12 | 8.062  | 4.159  | -2.873 | 0.00 | 0.00 |
| ATOM | 378 | H3'  | RG | 12 | 7.353  | 4.114  | -2.061 | 0.00 | 0.00 |
| ATOM | 379 | C2'  | RG | 12 | 7.398  | 3.655  | -4.144 | 0.00 | 0.00 |
| ATOM | 380 | 1H2' | RG | 12 | 6.389  | 4.017  | -4.233 | 0.00 | 0.00 |
| ATOM | 381 | O2'  | RG | 12 | 8.145  | 3.968  | -5.294 | 0.00 | 0.00 |
| ATOM | 382 | 2HO' | RG | 12 | 8.555  | 4.681  | -5.174 | 0.00 | 0.00 |
| ATOM | 383 | O3'  | RG | 12 | 8.597  | 5.457  | -3.006 | 0.00 | 0.00 |
| ATOM | 384 | P    | RC | 13 | 7.791  | 6.719  | -2.550 | 0.00 | 0.00 |
| ATOM | 385 | O1P  | RC | 13 | 8.649  | 7.875  | -2.783 | 0.00 | 0.00 |
| ATOM | 386 | O2P  | RC | 13 | 7.269  | 6.470  | -1.210 | 0.00 | 0.00 |
| ATOM | 387 | O5'  | RC | 13 | 6.565  | 6.806  | -3.533 | 0.00 | 0.00 |
| ATOM | 388 | C5'  | RC | 13 | 6.713  | 7.238  | -4.857 | 0.00 | 0.00 |
| ATOM | 389 | 1H5' | RC | 13 | 7.549  | 6.742  | -5.310 | 0.00 | 0.00 |
| ATOM | 390 | 2H5' | RC | 13 | 6.906  | 8.295  | -4.866 | 0.00 | 0.00 |
| ATOM | 391 | C4'  | RC | 13 | 5.479  | 6.948  | -5.699 | 0.00 | 0.00 |
| ATOM | 392 | H4'  | RC | 13 | 5.688  | 7.261  | -6.711 | 0.00 | 0.00 |
| ATOM | 393 | O4'  | RC | 13 | 5.156  | 5.565  | -5.720 | 0.00 | 0.00 |
| ATOM | 394 | C1'  | RC | 13 | 3.751  | 5.419  | -5.822 | 0.00 | 0.00 |
| ATOM | 395 | H1'  | RC | 13 | 3.515  | 4.866  | -6.716 | 0.00 | 0.00 |
| ATOM | 396 | N1   | RC | 13 | 3.158  | 4.710  | -4.656 | 0.00 | 0.00 |
| ATOM | 397 | C6   | RC | 13 | 3.680  | 4.818  | -3.402 | 0.00 | 0.00 |
| ATOM | 398 | H6   | RC | 13 | 4.572  | 5.379  | -3.238 | 0.00 | 0.00 |
| ATOM | 399 | C5   | RC | 13 | 3.075  | 4.227  | -2.355 | 0.00 | 0.00 |
| ATOM | 400 | H5   | RC | 13 | 3.487  | 4.323  | -1.377 | 0.00 | 0.00 |
| ATOM | 401 | C4   | RC | 13 | 1.890  | 3.512  | -2.606 | 0.00 | 0.00 |

|      |     |      |    |    |        |        |        |      |      |
|------|-----|------|----|----|--------|--------|--------|------|------|
| ATOM | 402 | N4   | RC | 13 | 1.277  | 2.916  | -1.649 | 0.00 | 0.00 |
| ATOM | 403 | H41  | RC | 13 | 0.500  | 2.351  | -1.878 | 0.00 | 0.00 |
| ATOM | 404 | H42  | RC | 13 | 1.659  | 2.921  | -0.746 | 0.00 | 0.00 |
| ATOM | 405 | N3   | RC | 13 | 1.376  | 3.384  | -3.798 | 0.00 | 0.00 |
| ATOM | 406 | C2   | RC | 13 | 1.987  | 3.987  | -4.835 | 0.00 | 0.00 |
| ATOM | 407 | O2   | RC | 13 | 1.471  | 3.892  | -5.927 | 0.00 | 0.00 |
| ATOM | 408 | C3'  | RC | 13 | 4.231  | 7.669  | -5.240 | 0.00 | 0.00 |
| ATOM | 409 | H3'  | RC | 13 | 4.122  | 7.527  | -4.176 | 0.00 | 0.00 |
| ATOM | 410 | C2'  | RC | 13 | 3.188  | 6.825  | -5.949 | 0.00 | 0.00 |
| ATOM | 411 | 1H2' | RC | 13 | 2.228  | 6.910  | -5.469 | 0.00 | 0.00 |
| ATOM | 412 | O2'  | RC | 13 | 3.074  | 7.122  | -7.308 | 0.00 | 0.00 |
| ATOM | 413 | 2HO' | RC | 13 | 2.809  | 7.469  | -7.499 | 0.00 | 0.00 |
| ATOM | 414 | O3'  | RC | 13 | 4.194  | 9.047  | -5.569 | 0.00 | 0.00 |
| ATOM | 415 | P    | RA | 14 | 3.234  | 10.029 | -4.808 | 0.00 | 0.00 |
| ATOM | 416 | O1P  | RA | 14 | 3.510  | 11.380 | -5.295 | 0.00 | 0.00 |
| ATOM | 417 | O2P  | RA | 14 | 3.360  | 9.765  | -3.380 | 0.00 | 0.00 |
| ATOM | 418 | O5'  | RA | 14 | 1.770  | 9.625  | -5.238 | 0.00 | 0.00 |
| ATOM | 419 | C5'  | RA | 14 | 1.274  | 9.933  | -6.516 | 0.00 | 0.00 |
| ATOM | 420 | 1H5' | RA | 14 | 1.988  | 9.616  | -7.252 | 0.00 | 0.00 |
| ATOM | 421 | 2H5' | RA | 14 | 1.140  | 10.992 | -6.608 | 0.00 | 0.00 |
| ATOM | 422 | C4'  | RA | 14 | -0.046 | 9.242  | -6.801 | 0.00 | 0.00 |
| ATOM | 423 | H4'  | RA | 14 | -0.324 | 9.451  | -7.816 | 0.00 | 0.00 |
| ATOM | 424 | O4'  | RA | 14 | 0.060  | 7.844  | -6.642 | 0.00 | 0.00 |
| ATOM | 425 | C1'  | RA | 14 | -1.158 | 7.345  | -6.121 | 0.00 | 0.00 |
| ATOM | 426 | H1'  | RA | 14 | -1.553 | 6.569  | -6.755 | 0.00 | 0.00 |
| ATOM | 427 | N9   | RA | 14 | -0.996 | 6.797  | -4.762 | 0.00 | 0.00 |
| ATOM | 428 | C8   | RA | 14 | -0.048 | 7.057  | -3.820 | 0.00 | 0.00 |
| ATOM | 429 | H8   | RA | 14 | 0.746  | 7.750  | -3.981 | 0.00 | 0.00 |
| ATOM | 430 | N7   | RA | 14 | -0.194 | 6.402  | -2.710 | 0.00 | 0.00 |
| ATOM | 431 | C5   | RA | 14 | -1.351 | 5.660  | -2.927 | 0.00 | 0.00 |
| ATOM | 432 | C6   | RA | 14 | -2.115 | 4.747  | -2.174 | 0.00 | 0.00 |
| ATOM | 433 | N6   | RA | 14 | -1.830 | 4.321  | -0.970 | 0.00 | 0.00 |
| ATOM | 434 | H61  | RA | 14 | -2.461 | 3.691  | -0.540 | 0.00 | 0.00 |
| ATOM | 435 | H62  | RA | 14 | -1.017 | 4.654  | -0.527 | 0.00 | 0.00 |
| ATOM | 436 | N1   | RA | 14 | -3.244 | 4.247  | -2.649 | 0.00 | 0.00 |
| ATOM | 437 | C2   | RA | 14 | -3.623 | 4.611  | -3.858 | 0.00 | 0.00 |
| ATOM | 438 | H2   | RA | 14 | -4.534 | 4.179  | -4.206 | 0.00 | 0.00 |
| ATOM | 439 | N3   | RA | 14 | -3.006 | 5.426  | -4.696 | 0.00 | 0.00 |
| ATOM | 440 | C4   | RA | 14 | -1.861 | 5.919  | -4.162 | 0.00 | 0.00 |
| ATOM | 441 | C3'  | RA | 14 | -1.192 | 9.693  | -5.917 | 0.00 | 0.00 |
| ATOM | 442 | H3'  | RA | 14 | -0.857 | 9.720  | -4.897 | 0.00 | 0.00 |
| ATOM | 443 | C2'  | RA | 14 | -2.128 | 8.510  | -6.111 | 0.00 | 0.00 |
| ATOM | 444 | 1H2' | RA | 14 | -2.832 | 8.441  | -5.303 | 0.00 | 0.00 |
| ATOM | 445 | O2'  | RA | 14 | -2.804 | 8.542  | -7.344 | 0.00 | 0.00 |
| ATOM | 446 | 2HO' | RA | 14 | -3.067 | 9.191  | -7.493 | 0.00 | 0.00 |
| ATOM | 447 | O3'  | RA | 14 | -1.758 | 10.920 | -6.295 | 0.00 | 0.00 |
| ATOM | 448 | P    | RC | 15 | -2.597 | 11.780 | -5.284 | 0.00 | 0.00 |
| ATOM | 449 | O1P  | RC | 15 | -2.960 | 13.020 | -5.951 | 0.00 | 0.00 |
| ATOM | 450 | O2P  | RC | 15 | -1.850 | 11.853 | -4.045 | 0.00 | 0.00 |
| ATOM | 451 | O5'  | RC | 15 | -3.907 | 10.956 | -5.008 | 0.00 | 0.00 |
| ATOM | 452 | C5'  | RC | 15 | -4.923 | 10.841 | -5.971 | 0.00 | 0.00 |
| ATOM | 453 | 1H5' | RC | 15 | -4.504 | 10.482 | -6.890 | 0.00 | 0.00 |
| ATOM | 454 | 2H5' | RC | 15 | -5.355 | 11.803 | -6.159 | 0.00 | 0.00 |
| ATOM | 455 | C4'  | RC | 15 | -6.031 | 9.898  | -5.540 | 0.00 | 0.00 |
| ATOM | 456 | H4'  | RC | 15 | -6.742 | 9.836  | -6.346 | 0.00 | 0.00 |
| ATOM | 457 | O4'  | RC | 15 | -5.547 | 8.602  | -5.246 | 0.00 | 0.00 |
| ATOM | 458 | C1'  | RC | 15 | -6.346 | 8.036  | -4.219 | 0.00 | 0.00 |
| ATOM | 459 | H1'  | RC | 15 | -6.804 | 7.132  | -4.586 | 0.00 | 0.00 |
| ATOM | 460 | N1   | RC | 15 | -5.572 | 7.705  | -2.991 | 0.00 | 0.00 |
| ATOM | 461 | C6   | RC | 15 | -4.338 | 8.229  | -2.740 | 0.00 | 0.00 |
| ATOM | 462 | H6   | RC | 15 | -3.897 | 8.914  | -3.427 | 0.00 | 0.00 |
| ATOM | 463 | C5   | RC | 15 | -3.665 | 7.871  | -1.625 | 0.00 | 0.00 |
| ATOM | 464 | H5   | RC | 15 | -2.692 | 8.270  | -1.427 | 0.00 | 0.00 |
| ATOM | 465 | C4   | RC | 15 | -4.303 | 6.993  | -0.723 | 0.00 | 0.00 |
| ATOM | 466 | N4   | RC | 15 | -3.738 | 6.660  | 0.391  | 0.00 | 0.00 |
| ATOM | 467 | H41  | RC | 15 | -4.217 | 6.060  | 1.019  | 0.00 | 0.00 |
| ATOM | 468 | H42  | RC | 15 | -2.844 | 7.014  | 0.596  | 0.00 | 0.00 |
| ATOM | 469 | N3   | RC | 15 | -5.497 | 6.513  | -0.928 | 0.00 | 0.00 |

|      |     |      |    |    |         |        |        |      |      |
|------|-----|------|----|----|---------|--------|--------|------|------|
| ATOM | 470 | C2   | RC | 15 | -6.146  | 6.848  | -2.057 | 0.00 | 0.00 |
| ATOM | 471 | O2   | RC | 15 | -7.262  | 6.392  | -2.218 | 0.00 | 0.00 |
| ATOM | 472 | C3'  | RC | 15 | -6.783  | 10.357 | -4.301 | 0.00 | 0.00 |
| ATOM | 473 | H3'  | RC | 15 | -6.076  | 10.644 | -3.545 | 0.00 | 0.00 |
| ATOM | 474 | C2'  | RC | 15 | -7.446  | 9.048  | -3.912 | 0.00 | 0.00 |
| ATOM | 475 | 1H2' | RC | 15 | -7.712  | 9.048  | -2.868 | 0.00 | 0.00 |
| ATOM | 476 | O2'  | RC | 15 | -8.561  | 8.743  | -4.711 | 0.00 | 0.00 |
| ATOM | 477 | 2HO' | RC | 15 | -8.952  | 9.047  | -4.845 | 0.00 | 0.00 |
| ATOM | 478 | O3'  | RC | 15 | -7.711  | 11.377 | -4.551 | 0.00 | 0.00 |
| ATOM | 479 | P    | RA | 16 | -8.076  | 12.428 | -3.441 | 0.00 | 0.00 |
| ATOM | 480 | O1P  | RA | 16 | -9.088  | 13.322 | -3.982 | 0.00 | 0.00 |
| ATOM | 481 | O2P  | RA | 16 | -6.835  | 13.001 | -2.952 | 0.00 | 0.00 |
| ATOM | 482 | O5'  | RA | 16 | -8.709  | 11.615 | -2.248 | 0.00 | 0.00 |
| ATOM | 483 | C5'  | RA | 16 | -9.993  | 11.054 | -2.321 | 0.00 | 0.00 |
| ATOM | 484 | 1H5' | RA | 16 | -10.063 | 10.443 | -3.198 | 0.00 | 0.00 |
| ATOM | 485 | 2H5' | RA | 16 | -10.714 | 11.844 | -2.390 | 0.00 | 0.00 |
| ATOM | 486 | C4'  | RA | 16 | -10.310 | 10.216 | -1.102 | 0.00 | 0.00 |
| ATOM | 487 | H4'  | RA | 16 | -11.306 | 9.829  | -1.223 | 0.00 | 0.00 |
| ATOM | 488 | O4'  | RA | 16 | -9.429  | 9.120  | -0.982 | 0.00 | 0.00 |
| ATOM | 489 | C1'  | RA | 16 | -9.161  | 8.903  | 0.381  | 0.00 | 0.00 |
| ATOM | 490 | H1'  | RA | 16 | -9.379  | 7.887  | 0.643  | 0.00 | 0.00 |
| ATOM | 491 | N9   | RA | 16 | -7.752  | 9.167  | 0.674  | 0.00 | 0.00 |
| ATOM | 492 | C8   | RA | 16 | -6.835  | 9.853  | -0.048 | 0.00 | 0.00 |
| ATOM | 493 | H8   | RA | 16 | -7.079  | 10.316 | -0.970 | 0.00 | 0.00 |
| ATOM | 494 | N7   | RA | 16 | -5.657  | 9.907  | 0.474  | 0.00 | 0.00 |
| ATOM | 495 | C5   | RA | 16 | -5.821  | 9.204  | 1.659  | 0.00 | 0.00 |
| ATOM | 496 | C6   | RA | 16 | -4.993  | 8.860  | 2.734  | 0.00 | 0.00 |
| ATOM | 497 | N6   | RA | 16 | -3.735  | 9.160  | 2.835  | 0.00 | 0.00 |
| ATOM | 498 | H61  | RA | 16 | -3.255  | 8.861  | 3.632  | 0.00 | 0.00 |
| ATOM | 499 | H62  | RA | 16 | -3.302  | 9.643  | 2.096  | 0.00 | 0.00 |
| ATOM | 500 | N1   | RA | 16 | -5.458  | 8.202  | 3.771  | 0.00 | 0.00 |
| ATOM | 501 | C2   | RA | 16 | -6.715  | 7.855  | 3.760  | 0.00 | 0.00 |
| ATOM | 502 | H2   | RA | 16 | -7.057  | 7.331  | 4.611  | 0.00 | 0.00 |
| ATOM | 503 | N3   | RA | 16 | -7.608  | 8.080  | 2.827  | 0.00 | 0.00 |
| ATOM | 504 | C4   | RA | 16 | -7.094  | 8.768  | 1.792  | 0.00 | 0.00 |
| ATOM | 505 | C3'  | RA | 16 | -10.256 | 10.979 | 0.201  | 0.00 | 0.00 |
| ATOM | 506 | H3'  | RA | 16 | -9.387  | 11.605 | 0.228  | 0.00 | 0.00 |
| ATOM | 507 | C2'  | RA | 16 | -10.059 | 9.835  | 1.174  | 0.00 | 0.00 |
| ATOM | 508 | 1H2' | RA | 16 | -9.591  | 10.163 | 2.081  | 0.00 | 0.00 |
| ATOM | 509 | O2'  | RA | 16 | -11.249 | 9.155  | 1.465  | 0.00 | 0.00 |
| ATOM | 510 | 2HO' | RA | 16 | -11.567 | 9.264  | 1.735  | 0.00 | 0.00 |
| ATOM | 511 | O3'  | RA | 16 | -11.427 | 11.703 | 0.471  | 0.00 | 0.00 |
| ATOM | 512 | P    | RC | 17 | -11.375 | 13.095 | 1.168  | 0.00 | 0.00 |
| ATOM | 513 | O1P  | RC | 17 | -12.734 | 13.469 | 1.491  | 0.00 | 0.00 |
| ATOM | 514 | O2P  | RC | 17 | -10.593 | 13.985 | 0.348  | 0.00 | 0.00 |
| ATOM | 515 | O5'  | RC | 17 | -10.592 | 12.893 | 2.502  | 0.00 | 0.00 |
| ATOM | 516 | C5'  | RC | 17 | -11.147 | 12.248 | 3.606  | 0.00 | 0.00 |
| ATOM | 517 | 1H5' | RC | 17 | -11.558 | 11.308 | 3.302  | 0.00 | 0.00 |
| ATOM | 518 | 2H5' | RC | 17 | -11.925 | 12.853 | 4.016  | 0.00 | 0.00 |
| ATOM | 519 | C4'  | RC | 17 | -10.132 | 11.993 | 4.697  | 0.00 | 0.00 |
| ATOM | 520 | H4'  | RC | 17 | -10.630 | 11.513 | 5.512  | 0.00 | 0.00 |
| ATOM | 521 | O4'  | RC | 17 | -9.075  | 11.170 | 4.260  | 0.00 | 0.00 |
| ATOM | 522 | C1'  | RC | 17 | -7.885  | 11.545 | 4.925  | 0.00 | 0.00 |
| ATOM | 523 | H1'  | RC | 17 | -7.509  | 10.704 | 5.482  | 0.00 | 0.00 |
| ATOM | 524 | N1   | RC | 17 | -6.834  | 11.997 | 3.978  | 0.00 | 0.00 |
| ATOM | 525 | C6   | RC | 17 | -7.134  | 12.519 | 2.757  | 0.00 | 0.00 |
| ATOM | 526 | H6   | RC | 17 | -8.149  | 12.609 | 2.454  | 0.00 | 0.00 |
| ATOM | 527 | C5   | RC | 17 | -6.152  | 12.925 | 1.938  | 0.00 | 0.00 |
| ATOM | 528 | H5   | RC | 17 | -6.398  | 13.328 | 0.986  | 0.00 | 0.00 |
| ATOM | 529 | C4   | RC | 17 | -4.825  | 12.787 | 2.382  | 0.00 | 0.00 |
| ATOM | 530 | N4   | RC | 17 | -3.832  | 13.104 | 1.619  | 0.00 | 0.00 |
| ATOM | 531 | H41  | RC | 17 | -2.912  | 12.953 | 1.955  | 0.00 | 0.00 |
| ATOM | 532 | H42  | RC | 17 | -4.011  | 13.405 | 0.695  | 0.00 | 0.00 |
| ATOM | 533 | N3   | RC | 17 | -4.514  | 12.290 | 3.549  | 0.00 | 0.00 |
| ATOM | 534 | C2   | RC | 17 | -5.507  | 11.918 | 4.373  | 0.00 | 0.00 |
| ATOM | 535 | O2   | RC | 17 | -5.203  | 11.521 | 5.482  | 0.00 | 0.00 |
| ATOM | 536 | C3'  | RC | 17 | -9.485  | 13.250 | 5.228  | 0.00 | 0.00 |
| ATOM | 537 | H3'  | RC | 17 | -9.172  | 13.853 | 4.399  | 0.00 | 0.00 |

|      |     |      |    |    |         |        |        |      |      |
|------|-----|------|----|----|---------|--------|--------|------|------|
| ATOM | 538 | C2'  | RC | 17 | -8.267  | 12.657 | 5.893  | 0.00 | 0.00 |
| ATOM | 539 | 1H2' | RC | 17 | -7.488  | 13.386 | 5.985  | 0.00 | 0.00 |
| ATOM | 540 | O2'  | RC | 17 | -8.558  | 12.088 | 7.129  | 0.00 | 0.00 |
| ATOM | 541 | 2HO' | RC | 17 | -8.951  | 12.575 | 7.541  | 0.00 | 0.00 |
| ATOM | 542 | O3'  | RC | 17 | -10.315 | 13.980 | 6.088  | 0.00 | 0.00 |
| ATOM | 543 | P    | RA | 18 | -10.125 | 15.530 | 6.280  | 0.00 | 0.00 |
| ATOM | 544 | O1P  | RA | 18 | -11.228 | 16.015 | 7.088  | 0.00 | 0.00 |
| ATOM | 545 | O2P  | RA | 18 | -9.889  | 16.130 | 4.981  | 0.00 | 0.00 |
| ATOM | 546 | O5'  | RA | 18 | -8.810  | 15.678 | 7.122  | 0.00 | 0.00 |
| ATOM | 547 | C5'  | RA | 18 | -8.764  | 15.384 | 8.483  | 0.00 | 0.00 |
| ATOM | 548 | 1H5' | RA | 18 | -9.208  | 14.428 | 8.662  | 0.00 | 0.00 |
| ATOM | 549 | 2H5' | RA | 18 | -9.316  | 16.117 | 9.029  | 0.00 | 0.00 |
| ATOM | 550 | C4'  | RA | 18 | -7.346  | 15.371 | 9.006  | 0.00 | 0.00 |
| ATOM | 551 | H4'  | RA | 18 | -7.376  | 15.104 | 10.043 | 0.00 | 0.00 |
| ATOM | 552 | O4'  | RA | 18 | -6.553  | 14.418 | 8.333  | 0.00 | 0.00 |
| ATOM | 553 | C1'  | RA | 18 | -5.236  | 14.914 | 8.255  | 0.00 | 0.00 |
| ATOM | 554 | H1'  | RA | 18 | -4.549  | 14.208 | 8.689  | 0.00 | 0.00 |
| ATOM | 555 | N9   | RA | 18 | -4.822  | 15.147 | 6.865  | 0.00 | 0.00 |
| ATOM | 556 | C8   | RA | 18 | -5.581  | 15.426 | 5.779  | 0.00 | 0.00 |
| ATOM | 557 | H8   | RA | 18 | -6.636  | 15.547 | 5.835  | 0.00 | 0.00 |
| ATOM | 558 | N7   | RA | 18 | -4.916  | 15.546 | 4.681  | 0.00 | 0.00 |
| ATOM | 559 | C5   | RA | 18 | -3.599  | 15.334 | 5.085  | 0.00 | 0.00 |
| ATOM | 560 | C6   | RA | 18 | -2.348  | 15.312 | 4.448  | 0.00 | 0.00 |
| ATOM | 561 | N6   | RA | 18 | -2.145  | 15.471 | 3.171  | 0.00 | 0.00 |
| ATOM | 562 | H61  | RA | 18 | -1.220  | 15.405 | 2.827  | 0.00 | 0.00 |
| ATOM | 563 | H62  | RA | 18 | -2.921  | 15.584 | 2.578  | 0.00 | 0.00 |
| ATOM | 564 | N1   | RA | 18 | -1.237  | 15.130 | 5.138  | 0.00 | 0.00 |
| ATOM | 565 | C2   | RA | 18 | -1.343  | 14.963 | 6.436  | 0.00 | 0.00 |
| ATOM | 566 | H2   | RA | 18 | -0.424  | 14.819 | 6.951  | 0.00 | 0.00 |
| ATOM | 567 | N3   | RA | 18 | -2.434  | 14.940 | 7.168  | 0.00 | 0.00 |
| ATOM | 568 | C4   | RA | 18 | -3.539  | 15.121 | 6.421  | 0.00 | 0.00 |
| ATOM | 569 | C3'  | RA | 18 | -6.625  | 16.699 | 8.893  | 0.00 | 0.00 |
| ATOM | 570 | H3'  | RA | 18 | -6.772  | 17.079 | 7.900  | 0.00 | 0.00 |
| ATOM | 571 | C2'  | RA | 18 | -5.195  | 16.214 | 9.040  | 0.00 | 0.00 |
| ATOM | 572 | 1H2' | RA | 18 | -4.504  | 16.913 | 8.608  | 0.00 | 0.00 |
| ATOM | 573 | O2'  | RA | 18 | -4.836  | 15.901 | 10.359 | 0.00 | 0.00 |
| ATOM | 574 | 2HO' | RA | 18 | -4.116  | 16.045 | 10.493 | 0.00 | 0.00 |
| ATOM | 575 | O3'  | RA | 18 | -7.009  | 17.652 | 9.857  | 0.00 | 0.00 |
| ATOM | 576 | P    | RG | 19 | -6.715  | 19.180 | 9.660  | 0.00 | 0.00 |
| ATOM | 577 | O1P  | RG | 19 | -7.262  | 19.889 | 10.811 | 0.00 | 0.00 |
| ATOM | 578 | O2P  | RG | 19 | -7.173  | 19.553 | 8.330  | 0.00 | 0.00 |
| ATOM | 579 | O5'  | RG | 19 | -5.155  | 19.333 | 9.687  | 0.00 | 0.00 |
| ATOM | 580 | C5'  | RG | 19 | -4.426  | 19.254 | 10.887 | 0.00 | 0.00 |
| ATOM | 581 | 1H5' | RG | 19 | -4.673  | 18.344 | 11.402 | 0.00 | 0.00 |
| ATOM | 582 | 2H5' | RG | 19 | -4.691  | 20.086 | 11.510 | 0.00 | 0.00 |
| ATOM | 583 | C4'  | RG | 19 | -2.931  | 19.285 | 10.642 | 0.00 | 0.00 |
| ATOM | 584 | H4'  | RG | 19 | -2.441  | 19.192 | 11.591 | 0.00 | 0.00 |
| ATOM | 585 | O4'  | RG | 19 | -2.498  | 18.233 | 9.806  | 0.00 | 0.00 |
| ATOM | 586 | C1'  | RG | 19 | -1.396  | 18.661 | 9.043  | 0.00 | 0.00 |
| ATOM | 587 | H1'  | RG | 19 | -0.551  | 18.023 | 9.216  | 0.00 | 0.00 |
| ATOM | 588 | N9   | RG | 19 | -1.694  | 18.650 | 7.606  | 0.00 | 0.00 |
| ATOM | 589 | C8   | RG | 19 | -2.899  | 18.707 | 6.973  | 0.00 | 0.00 |
| ATOM | 590 | H8   | RG | 19 | -3.824  | 18.780 | 7.498  | 0.00 | 0.00 |
| ATOM | 591 | N7   | RG | 19 | -2.829  | 18.676 | 5.677  | 0.00 | 0.00 |
| ATOM | 592 | C5   | RG | 19 | -1.459  | 18.614 | 5.430  | 0.00 | 0.00 |
| ATOM | 593 | C6   | RG | 19 | -0.707  | 18.589 | 4.212  | 0.00 | 0.00 |
| ATOM | 594 | O6   | RG | 19 | -1.098  | 18.571 | 3.058  | 0.00 | 0.00 |
| ATOM | 595 | N1   | RG | 19 | 0.651   | 18.604 | 4.407  | 0.00 | 0.00 |
| ATOM | 596 | H1   | RG | 19 | 1.230   | 18.618 | 3.601  | 0.00 | 0.00 |
| ATOM | 597 | C2   | RG | 19 | 1.231   | 18.620 | 5.618  | 0.00 | 0.00 |
| ATOM | 598 | N2   | RG | 19 | 2.518   | 18.674 | 5.645  | 0.00 | 0.00 |
| ATOM | 599 | H21  | RG | 19 | 3.020   | 18.758 | 4.794  | 0.00 | 0.00 |
| ATOM | 600 | H22  | RG | 19 | 2.978   | 18.717 | 6.517  | 0.00 | 0.00 |
| ATOM | 601 | N3   | RG | 19 | 0.581   | 18.619 | 6.762  | 0.00 | 0.00 |
| ATOM | 602 | C4   | RG | 19 | -0.764  | 18.621 | 6.609  | 0.00 | 0.00 |
| ATOM | 603 | C3'  | RG | 19 | -2.426  | 20.554 | 9.996  | 0.00 | 0.00 |
| ATOM | 604 | H3'  | RG | 19 | -3.046  | 20.796 | 9.159  | 0.00 | 0.00 |
| ATOM | 605 | C2'  | RG | 19 | -1.078  | 20.070 | 9.502  | 0.00 | 0.00 |

|      |     |      |    |    |        |        |        |      |      |
|------|-----|------|----|----|--------|--------|--------|------|------|
| ATOM | 606 | 1H2' | RG | 19 | -0.707 | 20.673 | 8.695  | 0.00 | 0.00 |
| ATOM | 607 | O2'  | RG | 19 | -0.112 | 19.977 | 10.519 | 0.00 | 0.00 |
| ATOM | 608 | 2HO' | RG | 19 | 0.410  | 20.249 | 10.466 | 0.00 | 0.00 |
| ATOM | 609 | O3'  | RG | 19 | -2.343 | 21.631 | 10.882 | 0.00 | 0.00 |
| ATOM | 610 | P    | RC | 20 | -2.331 | 23.099 | 10.375 | 0.00 | 0.00 |
| ATOM | 611 | O1P  | RC | 20 | -2.324 | 23.964 | 11.533 | 0.00 | 0.00 |
| ATOM | 612 | O2P  | RC | 20 | -3.410 | 23.244 | 9.431  | 0.00 | 0.00 |
| ATOM | 613 | O5'  | RC | 20 | -0.974 | 23.276 | 9.597  | 0.00 | 0.00 |
| ATOM | 614 | C5'  | RC | 20 | 0.248  | 23.378 | 10.265 | 0.00 | 0.00 |
| ATOM | 615 | 1H5' | RC | 20 | 0.369  | 22.554 | 10.926 | 0.00 | 0.00 |
| ATOM | 616 | 2H5' | RC | 20 | 0.272  | 24.272 | 10.847 | 0.00 | 0.00 |
| ATOM | 617 | C4'  | RC | 20 | 1.434  | 23.398 | 9.312  | 0.00 | 0.00 |
| ATOM | 618 | H4'  | RC | 20 | 2.328  | 23.439 | 9.906  | 0.00 | 0.00 |
| ATOM | 619 | O4'  | RC | 20 | 1.481  | 22.233 | 8.516  | 0.00 | 0.00 |
| ATOM | 620 | C1'  | RC | 20 | 2.042  | 22.553 | 7.259  | 0.00 | 0.00 |
| ATOM | 621 | H1'  | RC | 20 | 2.915  | 21.950 | 7.090  | 0.00 | 0.00 |
| ATOM | 622 | N1   | RC | 20 | 1.085  | 22.327 | 6.142  | 0.00 | 0.00 |
| ATOM | 623 | C6   | RC | 20 | -0.260 | 22.330 | 6.328  | 0.00 | 0.00 |
| ATOM | 624 | H6   | RC | 20 | -0.661 | 22.483 | 7.301  | 0.00 | 0.00 |
| ATOM | 625 | C5   | RC | 20 | -1.090 | 22.165 | 5.288  | 0.00 | 0.00 |
| ATOM | 626 | H5   | RC | 20 | -2.140 | 22.174 | 5.441  | 0.00 | 0.00 |
| ATOM | 627 | C4   | RC | 20 | -0.518 | 22.002 | 4.023  | 0.00 | 0.00 |
| ATOM | 628 | N4   | RC | 20 | -1.259 | 21.869 | 2.983  | 0.00 | 0.00 |
| ATOM | 629 | H41  | RC | 20 | -0.814 | 21.739 | 2.106  | 0.00 | 0.00 |
| ATOM | 630 | H42  | RC | 20 | -2.239 | 21.859 | 3.075  | 0.00 | 0.00 |
| ATOM | 631 | N3   | RC | 20 | 0.768  | 21.984 | 3.816  | 0.00 | 0.00 |
| ATOM | 632 | C2   | RC | 20 | 1.593  | 22.160 | 4.863  | 0.00 | 0.00 |
| ATOM | 633 | O2   | RC | 20 | 2.788  | 22.181 | 4.649  | 0.00 | 0.00 |
| ATOM | 634 | C3'  | RC | 20 | 1.466  | 24.569 | 8.347  | 0.00 | 0.00 |
| ATOM | 635 | H3'  | RC | 20 | 0.504  | 24.678 | 7.885  | 0.00 | 0.00 |
| ATOM | 636 | C2'  | RC | 20 | 2.451  | 24.011 | 7.335  | 0.00 | 0.00 |
| ATOM | 637 | 1H2' | RC | 20 | 2.349  | 24.498 | 6.388  | 0.00 | 0.00 |
| ATOM | 638 | O2'  | RC | 20 | 3.778  | 24.058 | 7.775  | 0.00 | 0.00 |
| ATOM | 639 | 2HO' | RC | 20 | 4.098  | 24.412 | 7.644  | 0.00 | 0.00 |
| ATOM | 640 | O3'  | RC | 20 | 1.882  | 25.773 | 8.927  | 0.00 | 0.00 |
| ATOM | 641 | P    | RA | 21 | 1.582  | 27.157 | 8.245  | 0.00 | 0.00 |
| ATOM | 642 | O1P  | RA | 21 | 2.046  | 28.197 | 9.155  | 0.00 | 0.00 |
| ATOM | 643 | O2P  | RA | 21 | 0.188  | 27.168 | 7.822  | 0.00 | 0.00 |
| ATOM | 644 | O5'  | RA | 21 | 2.468  | 27.210 | 6.941  | 0.00 | 0.00 |
| ATOM | 645 | C5'  | RA | 21 | 3.852  | 27.418 | 6.985  | 0.00 | 0.00 |
| ATOM | 646 | 1H5' | RA | 21 | 4.312  | 26.695 | 7.629  | 0.00 | 0.00 |
| ATOM | 647 | 2H5' | RA | 21 | 4.055  | 28.396 | 7.365  | 0.00 | 0.00 |
| ATOM | 648 | C4'  | RA | 21 | 4.467  | 27.306 | 5.602  | 0.00 | 0.00 |
| ATOM | 649 | H4'  | RA | 21 | 5.527  | 27.437 | 5.694  | 0.00 | 0.00 |
| ATOM | 650 | O4'  | RA | 21 | 4.218  | 26.057 | 5.012  | 0.00 | 0.00 |
| ATOM | 651 | C1'  | RA | 21 | 4.031  | 26.233 | 3.623  | 0.00 | 0.00 |
| ATOM | 652 | H1'  | RA | 21 | 4.692  | 25.596 | 3.074  | 0.00 | 0.00 |
| ATOM | 653 | N9   | RA | 21 | 2.647  | 25.911 | 3.235  | 0.00 | 0.00 |
| ATOM | 654 | C8   | RA | 21 | 1.532  | 25.831 | 4.011  | 0.00 | 0.00 |
| ATOM | 655 | H8   | RA | 21 | 1.543  | 26.047 | 5.054  | 0.00 | 0.00 |
| ATOM | 656 | N7   | RA | 21 | 0.464  | 25.448 | 3.396  | 0.00 | 0.00 |
| ATOM | 657 | C5   | RA | 21 | 0.903  | 25.286 | 2.089  | 0.00 | 0.00 |
| ATOM | 658 | C6   | RA | 21 | 0.305  | 24.904 | 0.879  | 0.00 | 0.00 |
| ATOM | 659 | N6   | RA | 21 | -0.937 | 24.514 | 0.757  | 0.00 | 0.00 |
| ATOM | 660 | H61  | RA | 21 | -1.244 | 24.216 | -0.135 | 0.00 | 0.00 |
| ATOM | 661 | H62  | RA | 21 | -1.510 | 24.470 | 1.557  | 0.00 | 0.00 |
| ATOM | 662 | N1   | RA | 21 | 0.989  | 24.901 | -0.257 | 0.00 | 0.00 |
| ATOM | 663 | C2   | RA | 21 | 2.258  | 25.247 | -0.206 | 0.00 | 0.00 |
| ATOM | 664 | H2   | RA | 21 | 2.787  | 25.240 | -1.131 | 0.00 | 0.00 |
| ATOM | 665 | N3   | RA | 21 | 2.965  | 25.601 | 0.850  | 0.00 | 0.00 |
| ATOM | 666 | C4   | RA | 21 | 2.221  | 25.602 | 1.977  | 0.00 | 0.00 |
| ATOM | 667 | C3'  | RA | 21 | 3.964  | 28.337 | 4.621  | 0.00 | 0.00 |
| ATOM | 668 | H3'  | RA | 21 | 2.897  | 28.380 | 4.679  | 0.00 | 0.00 |
| ATOM | 669 | C2'  | RA | 21 | 4.348  | 27.675 | 3.315  | 0.00 | 0.00 |
| ATOM | 670 | 1H2' | RA | 21 | 3.758  | 28.047 | 2.496  | 0.00 | 0.00 |
| ATOM | 671 | O2'  | RA | 21 | 5.709  | 27.786 | 3.047  | 0.00 | 0.00 |
| ATOM | 672 | 2HO' | RA | 21 | 5.986  | 28.177 | 2.936  | 0.00 | 0.00 |
| ATOM | 673 | O3'  | RA | 21 | 4.526  | 29.597 | 4.790  | 0.00 | 0.00 |

|      |     |      |     |    |        |        |        |      |      |
|------|-----|------|-----|----|--------|--------|--------|------|------|
| ATOM | 674 | P    | RA  | 22 | 3.781  | 30.881 | 4.326  | 0.00 | 0.00 |
| ATOM | 675 | O1P  | RA  | 22 | 4.597  | 32.013 | 4.710  | 0.00 | 0.00 |
| ATOM | 676 | O2P  | RA  | 22 | 2.431  | 30.785 | 4.814  | 0.00 | 0.00 |
| ATOM | 677 | O5'  | RA  | 22 | 3.704  | 30.820 | 2.770  | 0.00 | 0.00 |
| ATOM | 678 | C5'  | RA  | 22 | 4.828  | 31.040 | 1.979  | 0.00 | 0.00 |
| ATOM | 679 | 1H5' | RA  | 22 | 5.634  | 30.435 | 2.320  | 0.00 | 0.00 |
| ATOM | 680 | 2H5' | RA  | 22 | 5.130  | 32.058 | 2.058  | 0.00 | 0.00 |
| ATOM | 681 | C4'  | RA  | 22 | 4.574  | 30.732 | 0.510  | 0.00 | 0.00 |
| ATOM | 682 | H4'  | RA  | 22 | 5.487  | 30.890 | -0.027 | 0.00 | 0.00 |
| ATOM | 683 | O4'  | RA  | 22 | 4.164  | 29.407 | 0.315  | 0.00 | 0.00 |
| ATOM | 684 | C1'  | RA  | 22 | 3.235  | 29.363 | -0.752 | 0.00 | 0.00 |
| ATOM | 685 | H1'  | RA  | 22 | 3.564  | 28.680 | -1.509 | 0.00 | 0.00 |
| ATOM | 686 | N9   | RA  | 22 | 1.916  | 28.943 | -0.273 | 0.00 | 0.00 |
| ATOM | 687 | C8   | RA  | 22 | 1.403  | 28.971 | 0.987  | 0.00 | 0.00 |
| ATOM | 688 | H8   | RA  | 22 | 1.952  | 29.331 | 1.827  | 0.00 | 0.00 |
| ATOM | 689 | N7   | RA  | 22 | 0.201  | 28.523 | 1.087  | 0.00 | 0.00 |
| ATOM | 690 | C5   | RA  | 22 | -0.121 | 28.195 | -0.227 | 0.00 | 0.00 |
| ATOM | 691 | C6   | RA  | 22 | -1.236 | 27.648 | -0.865 | 0.00 | 0.00 |
| ATOM | 692 | N6   | RA  | 22 | -2.333 | 27.288 | -0.268 | 0.00 | 0.00 |
| ATOM | 693 | H61  | RA  | 22 | -3.036 | 26.853 | -0.808 | 0.00 | 0.00 |
| ATOM | 694 | H62  | RA  | 22 | -2.398 | 27.352 | 0.712  | 0.00 | 0.00 |
| ATOM | 695 | N1   | RA  | 22 | -1.252 | 27.459 | -2.173 | 0.00 | 0.00 |
| ATOM | 696 | C2   | RA  | 22 | -0.182 | 27.791 | -2.848 | 0.00 | 0.00 |
| ATOM | 697 | H2   | RA  | 22 | -0.232 | 27.633 | -3.898 | 0.00 | 0.00 |
| ATOM | 698 | N3   | RA  | 22 | 0.943  | 28.292 | -2.394 | 0.00 | 0.00 |
| ATOM | 699 | C4   | RA  | 22 | 0.914  | 28.463 | -1.058 | 0.00 | 0.00 |
| ATOM | 700 | C3'  | RA  | 22 | 3.522  | 31.596 | -0.136 | 0.00 | 0.00 |
| ATOM | 701 | H3'  | RA  | 22 | 2.686  | 31.667 | 0.520  | 0.00 | 0.00 |
| ATOM | 702 | C2'  | RA  | 22 | 3.165  | 30.757 | -1.340 | 0.00 | 0.00 |
| ATOM | 703 | 1H2' | RA  | 22 | 2.187  | 30.983 | -1.708 | 0.00 | 0.00 |
| ATOM | 704 | O2'  | RA  | 22 | 4.099  | 30.852 | -2.375 | 0.00 | 0.00 |
| ATOM | 705 | 2HO' | RA  | 22 | 4.298  | 31.444 | -2.530 | 0.00 | 0.00 |
| ATOM | 706 | O3'  | RA  | 22 | 3.986  | 32.860 | -0.491 | 0.00 | 0.00 |
| ATOM | 707 | P    | RG3 | 23 | 3.022  | 34.068 | -0.669 | 0.00 | 0.00 |
| ATOM | 708 | O1P  | RG3 | 23 | 3.831  | 35.214 | -0.975 | 0.00 | 0.00 |
| ATOM | 709 | O2P  | RG3 | 23 | 2.152  | 34.113 | 0.476  | 0.00 | 0.00 |
| ATOM | 710 | O5'  | RG3 | 23 | 2.155  | 33.737 | -1.934 | 0.00 | 0.00 |
| ATOM | 711 | C5'  | RG3 | 23 | 2.658  | 33.833 | -3.238 | 0.00 | 0.00 |
| ATOM | 712 | 1H5' | RG3 | 23 | 3.539  | 33.255 | -3.329 | 0.00 | 0.00 |
| ATOM | 713 | 2H5' | RG3 | 23 | 2.899  | 34.842 | -3.464 | 0.00 | 0.00 |
| ATOM | 714 | C4'  | RG3 | 23 | 1.657  | 33.348 | -4.254 | 0.00 | 0.00 |
| ATOM | 715 | H4'  | RG3 | 23 | 2.112  | 33.401 | -5.217 | 0.00 | 0.00 |
| ATOM | 716 | O4'  | RG3 | 23 | 1.286  | 32.025 | -4.040 | 0.00 | 0.00 |
| ATOM | 717 | C1'  | RG3 | 23 | -0.048 | 31.853 | -4.435 | 0.00 | 0.00 |
| ATOM | 718 | H1'  | RG3 | 23 | -0.107 | 31.105 | -5.194 | 0.00 | 0.00 |
| ATOM | 719 | N9   | RG3 | 23 | -0.871 | 31.427 | -3.301 | 0.00 | 0.00 |
| ATOM | 720 | C8   | RG3 | 23 | -0.719 | 31.688 | -1.975 | 0.00 | 0.00 |
| ATOM | 721 | H8   | RG3 | 23 | 0.119  | 32.206 | -1.573 | 0.00 | 0.00 |
| ATOM | 722 | N7   | RG3 | 23 | -1.681 | 31.246 | -1.235 | 0.00 | 0.00 |
| ATOM | 723 | C5   | RG3 | 23 | -2.542 | 30.646 | -2.139 | 0.00 | 0.00 |
| ATOM | 724 | C6   | RG3 | 23 | -3.791 | 29.978 | -1.966 | 0.00 | 0.00 |
| ATOM | 725 | O6   | RG3 | 23 | -4.414 | 29.754 | -0.946 | 0.00 | 0.00 |
| ATOM | 726 | N1   | RG3 | 23 | -4.348 | 29.555 | -3.133 | 0.00 | 0.00 |
| ATOM | 727 | H1   | RG3 | 23 | -5.226 | 29.097 | -3.069 | 0.00 | 0.00 |
| ATOM | 728 | C2   | RG3 | 23 | -3.784 | 29.728 | -4.334 | 0.00 | 0.00 |
| ATOM | 729 | N2   | RG3 | 23 | -4.458 | 29.326 | -5.352 | 0.00 | 0.00 |
| ATOM | 730 | H21  | RG3 | 23 | -5.364 | 28.959 | -5.227 | 0.00 | 0.00 |
| ATOM | 731 | H22  | RG3 | 23 | -4.085 | 29.510 | -6.246 | 0.00 | 0.00 |
| ATOM | 732 | N3   | RG3 | 23 | -2.628 | 30.318 | -4.550 | 0.00 | 0.00 |
| ATOM | 733 | C4   | RG3 | 23 | -2.047 | 30.758 | -3.407 | 0.00 | 0.00 |
| ATOM | 734 | C3'  | RG3 | 23 | 0.388  | 34.140 | -4.317 | 0.00 | 0.00 |
| ATOM | 735 | H3'  | RG3 | 23 | 0.035  | 34.321 | -3.331 | 0.00 | 0.00 |
| ATOM | 736 | C2'  | RG3 | 23 | -0.536 | 33.167 | -4.986 | 0.00 | 0.00 |
| ATOM | 737 | 1H2' | RG3 | 23 | -1.543 | 33.345 | -4.712 | 0.00 | 0.00 |
| ATOM | 738 | O2'  | RG3 | 23 | -0.404 | 33.164 | -6.377 | 0.00 | 0.00 |
| ATOM | 739 | 2HO' | RG3 | 23 | -0.370 | 33.793 | -6.663 | 0.00 | 0.00 |
| ATOM | 740 | O3'  | RG3 | 23 | 0.486  | 35.329 | -5.024 | 0.00 | 0.00 |
| ATOM | 741 | H3T  | RG3 | 23 | 0.038  | 35.705 | -5.026 | 0.00 | 0.00 |

|      |     |      |     |    |        |         |         |      |      |
|------|-----|------|-----|----|--------|---------|---------|------|------|
| ATOM | 742 | H5T  | RC5 | 24 | 12.401 | -24.111 | -10.251 | 0.00 | 0.00 |
| ATOM | 743 | O5'  | RC5 | 24 | 12.129 | -24.000 | -10.369 | 0.00 | 0.00 |
| ATOM | 744 | C5'  | RC5 | 24 | 10.880 | -23.484 | -10.225 | 0.00 | 0.00 |
| ATOM | 745 | 1H5' | RC5 | 24 | 10.788 | -22.649 | -10.800 | 0.00 | 0.00 |
| ATOM | 746 | 2H5' | RC5 | 24 | 10.751 | -23.226 | -9.268  | 0.00 | 0.00 |
| ATOM | 747 | C4'  | RC5 | 24 | 9.840  | -24.414 | -10.618 | 0.00 | 0.00 |
| ATOM | 748 | H4'  | RC5 | 24 | 10.030 | -24.747 | -11.570 | 0.00 | 0.00 |
| ATOM | 749 | O4'  | RC5 | 24 | 9.787  | -25.474 | -9.778  | 0.00 | 0.00 |
| ATOM | 750 | C1'  | RC5 | 24 | 8.483  | -25.959 | -9.743  | 0.00 | 0.00 |
| ATOM | 751 | H1'  | RC5 | 24 | 8.461  | -26.902 | -10.231 | 0.00 | 0.00 |
| ATOM | 752 | N1   | RC5 | 24 | 7.973  | -26.128 | -8.388  | 0.00 | 0.00 |
| ATOM | 753 | C6   | RC5 | 24 | 8.423  | -25.422 | -7.359  | 0.00 | 0.00 |
| ATOM | 754 | H6   | RC5 | 24 | 9.147  | -24.691 | -7.534  | 0.00 | 0.00 |
| ATOM | 755 | C5   | RC5 | 24 | 7.960  | -25.649 | -6.138  | 0.00 | 0.00 |
| ATOM | 756 | H5   | RC5 | 24 | 8.318  | -25.093 | -5.338  | 0.00 | 0.00 |
| ATOM | 757 | C4   | RC5 | 24 | 7.036  | -26.640 | -5.972  | 0.00 | 0.00 |
| ATOM | 758 | N4   | RC5 | 24 | 6.581  | -26.928 | -4.824  | 0.00 | 0.00 |
| ATOM | 759 | H41  | RC5 | 24 | 5.874  | -27.579 | -4.769  | 0.00 | 0.00 |
| ATOM | 760 | H42  | RC5 | 24 | 6.856  | -26.422 | -4.061  | 0.00 | 0.00 |
| ATOM | 761 | N3   | RC5 | 24 | 6.582  | -27.325 | -6.939  | 0.00 | 0.00 |
| ATOM | 762 | C2   | RC5 | 24 | 7.025  | -27.070 | -8.162  | 0.00 | 0.00 |
| ATOM | 763 | O2   | RC5 | 24 | 6.560  | -27.691 | -9.054  | 0.00 | 0.00 |
| ATOM | 764 | C3'  | RC5 | 24 | 8.475  | -23.799 | -10.604 | 0.00 | 0.00 |
| ATOM | 765 | H3'  | RC5 | 24 | 8.363  | -23.255 | -9.735  | 0.00 | 0.00 |
| ATOM | 766 | C2'  | RC5 | 24 | 7.645  | -24.998 | -10.528 | 0.00 | 0.00 |
| ATOM | 767 | 1H2' | RC5 | 24 | 6.751  | -24.767 | -10.059 | 0.00 | 0.00 |
| ATOM | 768 | O2'  | RC5 | 24 | 7.429  | -25.542 | -11.737 | 0.00 | 0.00 |
| ATOM | 769 | 2HO' | RC5 | 24 | 7.257  | -25.028 | -12.197 | 0.00 | 0.00 |
| ATOM | 770 | O3'  | RC5 | 24 | 8.197  | -23.027 | -11.701 | 0.00 | 0.00 |
| ATOM | 771 | P    | RU  | 25 | 7.084  | -21.942 | -11.682 | 0.00 | 0.00 |
| ATOM | 772 | O1P  | RU  | 25 | 7.172  | -21.211 | -12.891 | 0.00 | 0.00 |
| ATOM | 773 | O2P  | RU  | 25 | 7.171  | -21.242 | -10.452 | 0.00 | 0.00 |
| ATOM | 774 | O5'  | RU  | 25 | 5.737  | -22.698 | -11.668 | 0.00 | 0.00 |
| ATOM | 775 | C5'  | RU  | 25 | 5.192  | -23.251 | -12.810 | 0.00 | 0.00 |
| ATOM | 776 | 1H5' | RU  | 25 | 5.902  | -23.910 | -13.255 | 0.00 | 0.00 |
| ATOM | 777 | 2H5' | RU  | 25 | 4.960  | -22.490 | -13.504 | 0.00 | 0.00 |
| ATOM | 778 | C4'  | RU  | 25 | 3.931  | -24.003 | -12.519 | 0.00 | 0.00 |
| ATOM | 779 | H4'  | RU  | 25 | 3.569  | -24.392 | -13.431 | 0.00 | 0.00 |
| ATOM | 780 | O4'  | RU  | 25 | 4.148  | -25.072 | -11.646 | 0.00 | 0.00 |
| ATOM | 781 | C1'  | RU  | 25 | 2.985  | -25.273 | -10.888 | 0.00 | 0.00 |
| ATOM | 782 | H1'  | RU  | 25 | 2.602  | -26.249 | -11.094 | 0.00 | 0.00 |
| ATOM | 783 | N1   | RU  | 25 | 3.222  | -25.162 | -9.444  | 0.00 | 0.00 |
| ATOM | 784 | C6   | RU  | 25 | 4.225  | -24.418 | -8.923  | 0.00 | 0.00 |
| ATOM | 785 | H6   | RU  | 25 | 4.817  | -23.830 | -9.566  | 0.00 | 0.00 |
| ATOM | 786 | C5   | RU  | 25 | 4.479  | -24.429 | -7.614  | 0.00 | 0.00 |
| ATOM | 787 | H5   | RU  | 25 | 5.262  | -23.846 | -7.217  | 0.00 | 0.00 |
| ATOM | 788 | C4   | RU  | 25 | 3.702  | -25.193 | -6.712  | 0.00 | 0.00 |
| ATOM | 789 | O4   | RU  | 25 | 3.874  | -25.275 | -5.525  | 0.00 | 0.00 |
| ATOM | 790 | N3   | RU  | 25 | 2.681  | -25.849 | -7.286  | 0.00 | 0.00 |
| ATOM | 791 | H3   | RU  | 25 | 2.088  | -26.353 | -6.690  | 0.00 | 0.00 |
| ATOM | 792 | C2   | RU  | 25 | 2.382  | -25.858 | -8.608  | 0.00 | 0.00 |
| ATOM | 793 | O2   | RU  | 25 | 1.396  | -26.431 | -8.985  | 0.00 | 0.00 |
| ATOM | 794 | C3'  | RU  | 25 | 2.839  | -23.160 | -11.910 | 0.00 | 0.00 |
| ATOM | 795 | H3'  | RU  | 25 | 3.242  | -22.581 | -11.114 | 0.00 | 0.00 |
| ATOM | 796 | C2'  | RU  | 25 | 1.968  | -24.245 | -11.349 | 0.00 | 0.00 |
| ATOM | 797 | 1H2' | RU  | 25 | 1.368  | -23.877 | -10.547 | 0.00 | 0.00 |
| ATOM | 798 | O2'  | RU  | 25 | 1.160  | -24.830 | -12.325 | 0.00 | 0.00 |
| ATOM | 799 | 2HO' | RU  | 25 | 0.671  | -24.500 | -12.550 | 0.00 | 0.00 |
| ATOM | 800 | O3'  | RU  | 25 | 2.167  | -22.357 | -12.837 | 0.00 | 0.00 |
| ATOM | 801 | P    | RU  | 26 | 1.449  | -21.048 | -12.398 | 0.00 | 0.00 |
| ATOM | 802 | O1P  | RU  | 26 | 0.910  | -20.443 | -13.599 | 0.00 | 0.00 |
| ATOM | 803 | O2P  | RU  | 26 | 2.361  | -20.290 | -11.575 | 0.00 | 0.00 |
| ATOM | 804 | O5'  | RU  | 26 | 0.260  | -21.503 | -11.493 | 0.00 | 0.00 |
| ATOM | 805 | C5'  | RU  | 26 | -0.898 | -22.028 | -12.042 | 0.00 | 0.00 |
| ATOM | 806 | 1H5' | RU  | 26 | -0.655 | -22.780 | -12.750 | 0.00 | 0.00 |
| ATOM | 807 | 2H5' | RU  | 26 | -1.423 | -21.258 | -12.546 | 0.00 | 0.00 |
| ATOM | 808 | C4'  | RU  | 26 | -1.815 | -22.613 | -11.000 | 0.00 | 0.00 |
| ATOM | 809 | H4'  | RU  | 26 | -2.655 | -23.032 | -11.499 | 0.00 | 0.00 |



|      |     |      |    |    |        |         |         |      |      |
|------|-----|------|----|----|--------|---------|---------|------|------|
| ATOM | 810 | O4'  | RU | 26 | -1.188 | -23.645 | -10.263 | 0.00 | 0.00 |
| ATOM | 811 | C1'  | RU | 26 | -1.770 | -23.705 | -8.982  | 0.00 | 0.00 |
| ATOM | 812 | H1'  | RU | 26 | -2.256 | -24.651 | -8.851  | 0.00 | 0.00 |
| ATOM | 813 | N1   | RU | 26 | -0.782 | -23.539 | -7.892  | 0.00 | 0.00 |
| ATOM | 814 | C6   | RU | 26 | 0.331  | -22.782 | -8.030  | 0.00 | 0.00 |
| ATOM | 815 | H6   | RU | 26 | 0.527  | -22.319 | -8.964  | 0.00 | 0.00 |
| ATOM | 816 | C5   | RU | 26 | 1.173  | -22.595 | -6.998  | 0.00 | 0.00 |
| ATOM | 817 | H5   | RU | 26 | 2.033  | -21.990 | -7.118  | 0.00 | 0.00 |
| ATOM | 818 | C4   | RU | 26 | 0.933  | -23.173 | -5.720  | 0.00 | 0.00 |
| ATOM | 819 | O4   | RU | 26 | 1.637  | -23.051 | -4.739  | 0.00 | 0.00 |
| ATOM | 820 | N3   | RU | 26 | -0.193 | -23.919 | -5.659  | 0.00 | 0.00 |
| ATOM | 821 | H3   | RU | 26 | -0.409 | -24.303 | -4.776  | 0.00 | 0.00 |
| ATOM | 822 | C2   | RU | 26 | -1.078 | -24.105 | -6.672  | 0.00 | 0.00 |
| ATOM | 823 | O2   | RU | 26 | -2.083 | -24.743 | -6.462  | 0.00 | 0.00 |
| ATOM | 824 | C3'  | RU | 26 | -2.339 | -21.644 | -9.974  | 0.00 | 0.00 |
| ATOM | 825 | H3'  | RU | 26 | -1.519 | -21.092 | -9.592  | 0.00 | 0.00 |
| ATOM | 826 | C2'  | RU | 26 | -2.817 | -22.611 | -8.927  | 0.00 | 0.00 |
| ATOM | 827 | 1H2' | RU | 26 | -2.833 | -22.149 | -7.977  | 0.00 | 0.00 |
| ATOM | 828 | O2'  | RU | 26 | -4.066 | -23.147 | -9.228  | 0.00 | 0.00 |
| ATOM | 829 | 2HO' | RU | 26 | -4.500 | -22.927 | -9.071  | 0.00 | 0.00 |
| ATOM | 830 | O3'  | RU | 26 | -3.339 | -20.785 | -10.453 | 0.00 | 0.00 |
| ATOM | 831 | P    | RG | 27 | -3.711 | -19.478 | -9.675  | 0.00 | 0.00 |
| ATOM | 832 | O1P  | RG | 27 | -4.639 | -18.740 | -10.514 | 0.00 | 0.00 |
| ATOM | 833 | O2P  | RG | 27 | -2.479 | -18.843 | -9.242  | 0.00 | 0.00 |
| ATOM | 834 | O5'  | RG | 27 | -4.468 | -19.937 | -8.378  | 0.00 | 0.00 |
| ATOM | 835 | C5'  | RG | 27 | -5.791 | -20.384 | -8.415  | 0.00 | 0.00 |
| ATOM | 836 | 1H5' | RG | 27 | -5.907 | -21.156 | -9.148  | 0.00 | 0.00 |
| ATOM | 837 | 2H5' | RG | 27 | -6.444 | -19.576 | -8.683  | 0.00 | 0.00 |
| ATOM | 838 | C4'  | RG | 27 | -6.242 | -20.936 | -7.074  | 0.00 | 0.00 |
| ATOM | 839 | H4'  | RG | 27 | -7.239 | -21.324 | -7.199  | 0.00 | 0.00 |
| ATOM | 840 | O4'  | RG | 27 | -5.417 | -21.992 | -6.637  | 0.00 | 0.00 |
| ATOM | 841 | C1'  | RG | 27 | -5.313 | -21.951 | -5.234  | 0.00 | 0.00 |
| ATOM | 842 | H1'  | RG | 27 | -5.597 | -22.894 | -4.804  | 0.00 | 0.00 |
| ATOM | 843 | N9   | RG | 27 | -3.939 | -21.641 | -4.798  | 0.00 | 0.00 |
| ATOM | 844 | C8   | RG | 27 | -2.931 | -21.050 | -5.500  | 0.00 | 0.00 |
| ATOM | 845 | H8   | RG | 27 | -3.068 | -20.723 | -6.503  | 0.00 | 0.00 |
| ATOM | 846 | N7   | RG | 27 | -1.816 | -20.951 | -4.863  | 0.00 | 0.00 |
| ATOM | 847 | C5   | RG | 27 | -2.114 | -21.472 | -3.607  | 0.00 | 0.00 |
| ATOM | 848 | C6   | RG | 27 | -1.327 | -21.608 | -2.426  | 0.00 | 0.00 |
| ATOM | 849 | O6   | RG | 27 | -0.152 | -21.342 | -2.253  | 0.00 | 0.00 |
| ATOM | 850 | N1   | RG | 27 | -2.026 | -22.088 | -1.356  | 0.00 | 0.00 |
| ATOM | 851 | H1   | RG | 27 | -1.554 | -22.146 | -0.481  | 0.00 | 0.00 |
| ATOM | 852 | C2   | RG | 27 | -3.322 | -22.431 | -1.409  | 0.00 | 0.00 |
| ATOM | 853 | N2   | RG | 27 | -3.869 | -22.791 | -0.303  | 0.00 | 0.00 |
| ATOM | 854 | H21  | RG | 27 | -3.352 | -22.775 | 0.544   | 0.00 | 0.00 |
| ATOM | 855 | H22  | RG | 27 | -4.819 | -23.061 | -0.313  | 0.00 | 0.00 |
| ATOM | 856 | N3   | RG | 27 | -4.088 | -22.358 | -2.481  | 0.00 | 0.00 |
| ATOM | 857 | C4   | RG | 27 | -3.421 | -21.864 | -3.558  | 0.00 | 0.00 |
| ATOM | 858 | C3'  | RG | 27 | -6.258 | -19.923 | -5.950  | 0.00 | 0.00 |
| ATOM | 859 | H3'  | RG | 27 | -5.338 | -19.362 | -5.963  | 0.00 | 0.00 |
| ATOM | 860 | C2'  | RG | 27 | -6.264 | -20.864 | -4.761  | 0.00 | 0.00 |
| ATOM | 861 | 1H2' | RG | 27 | -5.901 | -20.382 | -3.873  | 0.00 | 0.00 |
| ATOM | 862 | O2'  | RG | 27 | -7.516 | -21.454 | -4.534  | 0.00 | 0.00 |
| ATOM | 863 | 2HO' | RG | 27 | -7.791 | -21.490 | -4.136  | 0.00 | 0.00 |
| ATOM | 864 | O3'  | RG | 27 | -7.365 | -19.051 | -5.986  | 0.00 | 0.00 |
| ATOM | 865 | P    | RC | 28 | -7.326 | -17.640 | -5.297  | 0.00 | 0.00 |
| ATOM | 866 | O1P  | RC | 28 | -8.604 | -16.986 | -5.574  | 0.00 | 0.00 |
| ATOM | 867 | O2P  | RC | 28 | -6.100 | -16.975 | -5.704  | 0.00 | 0.00 |
| ATOM | 868 | O5'  | RC | 28 | -7.233 | -17.891 | -3.749  | 0.00 | 0.00 |
| ATOM | 869 | C5'  | RC | 28 | -8.311 | -18.423 | -3.040  | 0.00 | 0.00 |
| ATOM | 870 | 1H5' | RC | 28 | -8.681 | -19.294 | -3.542  | 0.00 | 0.00 |
| ATOM | 871 | 2H5' | RC | 28 | -9.113 | -17.719 | -2.977  | 0.00 | 0.00 |
| ATOM | 872 | C4'  | RC | 28 | -7.912 | -18.820 | -1.627  | 0.00 | 0.00 |
| ATOM | 873 | H4'  | RC | 28 | -8.769 | -19.265 | -1.158  | 0.00 | 0.00 |
| ATOM | 874 | O4'  | RC | 28 | -6.862 | -19.766 | -1.606  | 0.00 | 0.00 |
| ATOM | 875 | C1'  | RC | 28 | -6.033 | -19.522 | -0.482  | 0.00 | 0.00 |
| ATOM | 876 | H1'  | RC | 28 | -5.958 | -20.414 | 0.115   | 0.00 | 0.00 |
| ATOM | 877 | N1   | RC | 28 | -4.663 | -19.101 | -0.870  | 0.00 | 0.00 |

|      |     |      |    |    |        |         |        |      |      |
|------|-----|------|----|----|--------|---------|--------|------|------|
| ATOM | 878 | C6   | RC | 28 | -4.360 | -18.619 | -2.107 | 0.00 | 0.00 |
| ATOM | 879 | H6   | RC | 28 | -5.131 | -18.528 | -2.833 | 0.00 | 0.00 |
| ATOM | 880 | C5   | RC | 28 | -3.098 | -18.293 | -2.429 | 0.00 | 0.00 |
| ATOM | 881 | H5   | RC | 28 | -2.876 | -17.930 | -3.407 | 0.00 | 0.00 |
| ATOM | 882 | C4   | RC | 28 | -2.126 | -18.455 | -1.440 | 0.00 | 0.00 |
| ATOM | 883 | N4   | RC | 28 | -0.900 | -18.177 | -1.691 | 0.00 | 0.00 |
| ATOM | 884 | H41  | RC | 28 | -0.234 | -18.377 | -0.988 | 0.00 | 0.00 |
| ATOM | 885 | H42  | RC | 28 | -0.655 | -17.889 | -2.595 | 0.00 | 0.00 |
| ATOM | 886 | N3   | RC | 28 | -2.389 | -18.888 | -0.238 | 0.00 | 0.00 |
| ATOM | 887 | C2   | RC | 28 | -3.651 | -19.215 | 0.068  | 0.00 | 0.00 |
| ATOM | 888 | O2   | RC | 28 | -3.877 | -19.593 | 1.203  | 0.00 | 0.00 |
| ATOM | 889 | C3'  | RC | 28 | -7.463 | -17.668 | -0.739 | 0.00 | 0.00 |
| ATOM | 890 | H3'  | RC | 28 | -6.780 | -17.049 | -1.288 | 0.00 | 0.00 |
| ATOM | 891 | C2'  | RC | 28 | -6.718 | -18.441 | 0.332  | 0.00 | 0.00 |
| ATOM | 892 | 1H2' | RC | 28 | -6.014 | -17.815 | 0.848  | 0.00 | 0.00 |
| ATOM | 893 | O2'  | RC | 28 | -7.582 | -19.072 | 1.243  | 0.00 | 0.00 |
| ATOM | 894 | 2HO' | RC | 28 | -8.309 | -18.638 | 1.288  | 0.00 | 0.00 |
| ATOM | 895 | O3'  | RC | 28 | -8.527 | -16.932 | -0.201 | 0.00 | 0.00 |
| ATOM | 896 | P    | RU | 29 | -8.367 | -15.428 | 0.229  | 0.00 | 0.00 |
| ATOM | 897 | O1P  | RU | 29 | -9.634 | -14.983 | 0.776  | 0.00 | 0.00 |
| ATOM | 898 | O2P  | RU | 29 | -7.807 | -14.709 | -0.888 | 0.00 | 0.00 |
| ATOM | 899 | O5'  | RU | 29 | -7.307 | -15.423 | 1.373  | 0.00 | 0.00 |
| ATOM | 900 | C5'  | RU | 29 | -7.598 | -15.864 | 2.660  | 0.00 | 0.00 |
| ATOM | 901 | 1H5' | RU | 29 | -8.047 | -16.830 | 2.609  | 0.00 | 0.00 |
| ATOM | 902 | 2H5' | RU | 29 | -8.289 | -15.188 | 3.124  | 0.00 | 0.00 |
| ATOM | 903 | C4'  | RU | 29 | -6.372 | -15.956 | 3.527  | 0.00 | 0.00 |
| ATOM | 904 | H4'  | RU | 29 | -6.656 | -16.372 | 4.465  | 0.00 | 0.00 |
| ATOM | 905 | O4'  | RU | 29 | -5.373 | -16.771 | 2.954  | 0.00 | 0.00 |
| ATOM | 906 | C1'  | RU | 29 | -4.113 | -16.268 | 3.338  | 0.00 | 0.00 |
| ATOM | 907 | H1'  | RU | 29 | -3.606 | -17.013 | 3.919  | 0.00 | 0.00 |
| ATOM | 908 | N1   | RU | 29 | -3.246 | -15.931 | 2.196  | 0.00 | 0.00 |
| ATOM | 909 | C6   | RU | 29 | -3.730 | -15.663 | 0.951  | 0.00 | 0.00 |
| ATOM | 910 | H6   | RU | 29 | -4.782 | -15.683 | 0.789  | 0.00 | 0.00 |
| ATOM | 911 | C5   | RU | 29 | -2.897 | -15.377 | -0.066 | 0.00 | 0.00 |
| ATOM | 912 | H5   | RU | 29 | -3.283 | -15.202 | -1.037 | 0.00 | 0.00 |
| ATOM | 913 | C4   | RU | 29 | -1.481 | -15.321 | 0.125  | 0.00 | 0.00 |
| ATOM | 914 | O4   | RU | 29 | -0.662 | -15.052 | -0.726 | 0.00 | 0.00 |
| ATOM | 915 | N3   | RU | 29 | -1.078 | -15.584 | 1.387  | 0.00 | 0.00 |
| ATOM | 916 | H3   | RU | 29 | -0.105 | -15.546 | 1.557  | 0.00 | 0.00 |
| ATOM | 917 | C2   | RU | 29 | -1.884 | -15.871 | 2.437  | 0.00 | 0.00 |
| ATOM | 918 | O2   | RU | 29 | -1.387 | -16.043 | 3.532  | 0.00 | 0.00 |
| ATOM | 919 | C3'  | RU | 29 | -5.752 | -14.620 | 3.816  | 0.00 | 0.00 |
| ATOM | 920 | H3'  | RU | 29 | -5.710 | -14.044 | 2.924  | 0.00 | 0.00 |
| ATOM | 921 | C2'  | RU | 29 | -4.364 | -15.051 | 4.206  | 0.00 | 0.00 |
| ATOM | 922 | 1H2' | RU | 29 | -3.671 | -14.287 | 4.001  | 0.00 | 0.00 |
| ATOM | 923 | O2'  | RU | 29 | -4.276 | -15.445 | 5.519  | 0.00 | 0.00 |
| ATOM | 924 | 2HO' | RU | 29 | -4.503 | -14.963 | 5.924  | 0.00 | 0.00 |
| ATOM | 925 | O3'  | RU | 29 | -6.420 | -13.916 | 4.824  | 0.00 | 0.00 |
| ATOM | 926 | P    | RG | 30 | -6.208 | -12.373 | 5.054  | 0.00 | 0.00 |
| ATOM | 927 | O1P  | RG | 30 | -7.239 | -11.925 | 5.983  | 0.00 | 0.00 |
| ATOM | 928 | O2P  | RG | 30 | -6.095 | -11.723 | 3.754  | 0.00 | 0.00 |
| ATOM | 929 | O5'  | RG | 30 | -4.813 | -12.237 | 5.780  | 0.00 | 0.00 |
| ATOM | 930 | C5'  | RG | 30 | -4.620 | -12.663 | 7.106  | 0.00 | 0.00 |
| ATOM | 931 | 1H5' | RG | 30 | -4.810 | -13.714 | 7.188  | 0.00 | 0.00 |
| ATOM | 932 | 2H5' | RG | 30 | -5.299 | -12.155 | 7.759  | 0.00 | 0.00 |
| ATOM | 933 | C4'  | RG | 30 | -3.199 | -12.402 | 7.582  | 0.00 | 0.00 |
| ATOM | 934 | H4'  | RG | 30 | -3.071 | -12.920 | 8.520  | 0.00 | 0.00 |
| ATOM | 935 | O4'  | RG | 30 | -2.260 | -12.901 | 6.653  | 0.00 | 0.00 |
| ATOM | 936 | C1'  | RG | 30 | -1.486 | -11.838 | 6.161  | 0.00 | 0.00 |
| ATOM | 937 | H1'  | RG | 30 | -0.554 | -11.814 | 6.694  | 0.00 | 0.00 |
| ATOM | 938 | N9   | RG | 30 | -1.213 | -12.015 | 4.728  | 0.00 | 0.00 |
| ATOM | 939 | C8   | RG | 30 | -2.082 | -12.018 | 3.678  | 0.00 | 0.00 |
| ATOM | 940 | H8   | RG | 30 | -3.138 | -11.935 | 3.819  | 0.00 | 0.00 |
| ATOM | 941 | N7   | RG | 30 | -1.521 | -12.125 | 2.519  | 0.00 | 0.00 |
| ATOM | 942 | C5   | RG | 30 | -0.165 | -12.189 | 2.817  | 0.00 | 0.00 |
| ATOM | 943 | C6   | RG | 30 | 0.987  | -12.278 | 1.981  | 0.00 | 0.00 |
| ATOM | 944 | O6   | RG | 30 | 1.049  | -12.323 | 0.767  | 0.00 | 0.00 |
| ATOM | 945 | N1   | RG | 30 | 2.173  | -12.290 | 2.664  | 0.00 | 0.00 |

|      |      |      |    |    |        |         |        |      |      |
|------|------|------|----|----|--------|---------|--------|------|------|
| ATOM | 946  | H1   | RG | 30 | 3.019  | -12.324 | 2.136  | 0.00 | 0.00 |
| ATOM | 947  | C2   | RG | 30 | 2.257  | -12.214 | 3.998  | 0.00 | 0.00 |
| ATOM | 948  | N2   | RG | 30 | 3.443  | -12.207 | 4.506  | 0.00 | 0.00 |
| ATOM | 949  | H21  | RG | 30 | 4.246  | -12.226 | 3.919  | 0.00 | 0.00 |
| ATOM | 950  | H22  | RG | 30 | 3.522  | -12.176 | 5.488  | 0.00 | 0.00 |
| ATOM | 951  | N3   | RG | 30 | 1.224  | -12.121 | 4.818  | 0.00 | 0.00 |
| ATOM | 952  | C4   | RG | 30 | 0.028  | -12.117 | 4.166  | 0.00 | 0.00 |
| ATOM | 953  | C3'  | RG | 30 | -2.930 | -10.910 | 7.786  | 0.00 | 0.00 |
| ATOM | 954  | H3'  | RG | 30 | -3.842 | -10.350 | 7.915  | 0.00 | 0.00 |
| ATOM | 955  | C2'  | RG | 30 | -2.259 | -10.566 | 6.470  | 0.00 | 0.00 |
| ATOM | 956  | 1H2' | RG | 30 | -3.023 | -10.412 | 5.729  | 0.00 | 0.00 |
| ATOM | 957  | O2'  | RG | 30 | -1.439 | -9.437  | 6.568  | 0.00 | 0.00 |
| ATOM | 958  | 2HO' | RG | 30 | -0.971 | -9.498  | 7.332  | 0.00 | 0.00 |
| ATOM | 959  | O3'  | RG | 30 | -2.052 | -10.697 | 8.861  | 0.00 | 0.00 |
| ATOM | 960  | P    | RA | 31 | -2.555 | -10.643 | 10.354 | 0.00 | 0.00 |
| ATOM | 961  | O1P  | RA | 31 | -1.388 | -10.689 | 11.181 | 0.00 | 0.00 |
| ATOM | 962  | O2P  | RA | 31 | -3.587 | -11.621 | 10.558 | 0.00 | 0.00 |
| ATOM | 963  | O5'  | RA | 31 | -3.178 | -9.229  | 10.506 | 0.00 | 0.00 |
| ATOM | 964  | C5'  | RA | 31 | -4.280 | -8.999  | 11.271 | 0.00 | 0.00 |
| ATOM | 965  | 1H5' | RA | 31 | -4.198 | -9.532  | 12.170 | 0.00 | 0.00 |
| ATOM | 966  | 2H5' | RA | 31 | -5.123 | -9.330  | 10.774 | 0.00 | 0.00 |
| ATOM | 967  | C4'  | RA | 31 | -4.469 | -7.533  | 11.573 | 0.00 | 0.00 |
| ATOM | 968  | H4'  | RA | 31 | -5.325 | -7.439  | 12.202 | 0.00 | 0.00 |
| ATOM | 969  | O4'  | RA | 31 | -3.371 | -7.025  | 12.273 | 0.00 | 0.00 |
| ATOM | 970  | C1'  | RA | 31 | -3.021 | -5.770  | 11.771 | 0.00 | 0.00 |
| ATOM | 971  | H1'  | RA | 31 | -2.942 | -5.070  | 12.574 | 0.00 | 0.00 |
| ATOM | 972  | N9   | RA | 31 | -1.694 | -5.869  | 11.150 | 0.00 | 0.00 |
| ATOM | 973  | C8   | RA | 31 | -1.276 | -6.571  | 10.094 | 0.00 | 0.00 |
| ATOM | 974  | H8   | RA | 31 | -1.921 | -7.180  | 9.558  | 0.00 | 0.00 |
| ATOM | 975  | N7   | RA | 31 | -0.028 | -6.446  | 9.813  | 0.00 | 0.00 |
| ATOM | 976  | C5   | RA | 31 | 0.410  | -5.585  | 10.763 | 0.00 | 0.00 |
| ATOM | 977  | C6   | RA | 31 | 1.634  | -5.008  | 11.062 | 0.00 | 0.00 |
| ATOM | 978  | N6   | RA | 31 | 2.739  | -5.197  | 10.429 | 0.00 | 0.00 |
| ATOM | 979  | H61  | RA | 31 | 3.539  | -4.748  | 10.740 | 0.00 | 0.00 |
| ATOM | 980  | H62  | RA | 31 | 2.756  | -5.819  | 9.690  | 0.00 | 0.00 |
| ATOM | 981  | N1   | RA | 31 | 1.743  | -4.197  | 12.057 | 0.00 | 0.00 |
| ATOM | 982  | C2   | RA | 31 | 0.681  | -3.948  | 12.758 | 0.00 | 0.00 |
| ATOM | 983  | H2   | RA | 31 | 0.823  | -3.276  | 13.534 | 0.00 | 0.00 |
| ATOM | 984  | N3   | RA | 31 | -0.521 | -4.416  | 12.603 | 0.00 | 0.00 |
| ATOM | 985  | C4   | RA | 31 | -0.595 | -5.233  | 11.576 | 0.00 | 0.00 |
| ATOM | 986  | C3'  | RA | 31 | -4.706 | -6.646  | 10.354 | 0.00 | 0.00 |
| ATOM | 987  | H3'  | RA | 31 | -4.123 | -7.033  | 9.541  | 0.00 | 0.00 |
| ATOM | 988  | C2'  | RA | 31 | -4.129 | -5.329  | 10.834 | 0.00 | 0.00 |
| ATOM | 989  | 1H2' | RA | 31 | -3.771 | -4.747  | 10.007 | 0.00 | 0.00 |
| ATOM | 990  | O2'  | RA | 31 | -5.034 | -4.575  | 11.604 | 0.00 | 0.00 |
| ATOM | 991  | 2HO' | RA | 31 | -5.573 | -4.083  | 11.045 | 0.00 | 0.00 |
| ATOM | 992  | O3'  | RA | 31 | -6.065 | -6.591  | 9.989  | 0.00 | 0.00 |
| ATOM | 993  | P    | RG | 32 | -6.574 | -5.793  | 8.731  | 0.00 | 0.00 |
| ATOM | 994  | O1P  | RG | 32 | -7.873 | -6.350  | 8.370  | 0.00 | 0.00 |
| ATOM | 995  | O2P  | RG | 32 | -5.521 | -5.795  | 7.705  | 0.00 | 0.00 |
| ATOM | 996  | O5'  | RG | 32 | -6.769 | -4.315  | 9.252  | 0.00 | 0.00 |
| ATOM | 997  | C5'  | RG | 32 | -7.997 | -3.876  | 9.749  | 0.00 | 0.00 |
| ATOM | 998  | 1H5' | RG | 32 | -8.376 | -4.572  | 10.454 | 0.00 | 0.00 |
| ATOM | 999  | 2H5' | RG | 32 | -8.695 | -3.838  | 8.954  | 0.00 | 0.00 |
| ATOM | 1000 | C4'  | RG | 32 | -7.941 | -2.516  | 10.415 | 0.00 | 0.00 |
| ATOM | 1001 | H4'  | RG | 32 | -8.949 | -2.246  | 10.681 | 0.00 | 0.00 |
| ATOM | 1002 | O4'  | RG | 32 | -7.155 | -2.536  | 11.581 | 0.00 | 0.00 |
| ATOM | 1003 | C1'  | RG | 32 | -6.833 | -1.201  | 11.914 | 0.00 | 0.00 |
| ATOM | 1004 | H1'  | RG | 32 | -7.507 | -0.854  | 12.677 | 0.00 | 0.00 |
| ATOM | 1005 | N9   | RG | 32 | -5.444 | -1.101  | 12.408 | 0.00 | 0.00 |
| ATOM | 1006 | C8   | RG | 32 | -5.048 | -0.708  | 13.630 | 0.00 | 0.00 |
| ATOM | 1007 | H8   | RG | 32 | -5.737 | -0.417  | 14.379 | 0.00 | 0.00 |
| ATOM | 1008 | N7   | RG | 32 | -3.768 | -0.733  | 13.820 | 0.00 | 0.00 |
| ATOM | 1009 | C5   | RG | 32 | -3.265 | -1.155  | 12.609 | 0.00 | 0.00 |
| ATOM | 1010 | C6   | RG | 32 | -1.930 | -1.375  | 12.176 | 0.00 | 0.00 |
| ATOM | 1011 | O6   | RG | 32 | -0.895 | -1.214  | 12.774 | 0.00 | 0.00 |
| ATOM | 1012 | N1   | RG | 32 | -1.842 | -1.804  | 10.895 | 0.00 | 0.00 |
| ATOM | 1013 | H1   | RG | 32 | -0.941 | -2.000  | 10.541 | 0.00 | 0.00 |

|      |      |      |    |    |         |        |        |      |      |
|------|------|------|----|----|---------|--------|--------|------|------|
| ATOM | 1014 | C2   | RG | 32 | -2.901  | -1.950 | 10.092 | 0.00 | 0.00 |
| ATOM | 1015 | N2   | RG | 32 | -2.668  | -2.283 | 8.885  | 0.00 | 0.00 |
| ATOM | 1016 | H21  | RG | 32 | -1.748  | -2.371 | 8.550  | 0.00 | 0.00 |
| ATOM | 1017 | H22  | RG | 32 | -3.441  | -2.319 | 8.282  | 0.00 | 0.00 |
| ATOM | 1018 | N3   | RG | 32 | -4.150  | -1.739 | 10.441 | 0.00 | 0.00 |
| ATOM | 1019 | C4   | RG | 32 | -4.282  | -1.357 | 11.731 | 0.00 | 0.00 |
| ATOM | 1020 | C3'  | RG | 32 | -7.361  | -1.396 | 9.573  | 0.00 | 0.00 |
| ATOM | 1021 | H3'  | RG | 32 | -6.443  | -1.732 | 9.123  | 0.00 | 0.00 |
| ATOM | 1022 | C2'  | RG | 32 | -7.071  | -0.360 | 10.661 | 0.00 | 0.00 |
| ATOM | 1023 | 1H2' | RG | 32 | -6.213  | 0.223  | 10.398 | 0.00 | 0.00 |
| ATOM | 1024 | O2'  | RG | 32 | -8.177  | 0.468  | 10.898 | 0.00 | 0.00 |
| ATOM | 1025 | 2HO' | RG | 32 | -8.393  | 0.860  | 10.083 | 0.00 | 0.00 |
| ATOM | 1026 | O3'  | RG | 32 | -8.241  | -0.950 | 8.575  | 0.00 | 0.00 |
| ATOM | 1027 | P    | RG | 33 | -7.889  | 0.272  | 7.658  | 0.00 | 0.00 |
| ATOM | 1028 | O1P  | RG | 33 | -6.510  | 0.138  | 7.218  | 0.00 | 0.00 |
| ATOM | 1029 | O2P  | RG | 33 | -8.274  | 1.471  | 8.378  | 0.00 | 0.00 |
| ATOM | 1030 | O5'  | RG | 33 | -8.800  | 0.121  | 6.396  | 0.00 | 0.00 |
| ATOM | 1031 | C5'  | RG | 33 | -10.193 | 0.133  | 6.463  | 0.00 | 0.00 |
| ATOM | 1032 | 1H5' | RG | 33 | -10.524 | 0.580  | 7.368  | 0.00 | 0.00 |
| ATOM | 1033 | 2H5' | RG | 33 | -10.525 | -0.872 | 6.450  | 0.00 | 0.00 |
| ATOM | 1034 | C4'  | RG | 33 | -10.828 | 0.859  | 5.305  | 0.00 | 0.00 |
| ATOM | 1035 | H4'  | RG | 33 | -11.884 | 0.675  | 5.334  | 0.00 | 0.00 |
| ATOM | 1036 | O4'  | RG | 33 | -10.642 | 2.243  | 5.415  | 0.00 | 0.00 |
| ATOM | 1037 | C1'  | RG | 33 | -10.397 | 2.791  | 4.134  | 0.00 | 0.00 |
| ATOM | 1038 | H1'  | RG | 33 | -11.052 | 3.621  | 3.942  | 0.00 | 0.00 |
| ATOM | 1039 | N9   | RG | 33 | -9.001  | 3.259  | 4.020  | 0.00 | 0.00 |
| ATOM | 1040 | C8   | RG | 33 | -7.980  | 3.131  | 4.912  | 0.00 | 0.00 |
| ATOM | 1041 | H8   | RG | 33 | -8.116  | 2.656  | 5.855  | 0.00 | 0.00 |
| ATOM | 1042 | N7   | RG | 33 | -6.848  | 3.618  | 4.506  | 0.00 | 0.00 |
| ATOM | 1043 | C5   | RG | 33 | -7.139  | 4.121  | 3.245  | 0.00 | 0.00 |
| ATOM | 1044 | C6   | RG | 33 | -6.324  | 4.765  | 2.261  | 0.00 | 0.00 |
| ATOM | 1045 | O6   | RG | 33 | -5.133  | 5.029  | 2.304  | 0.00 | 0.00 |
| ATOM | 1046 | N1   | RG | 33 | -7.001  | 5.127  | 1.129  | 0.00 | 0.00 |
| ATOM | 1047 | H1   | RG | 33 | -6.490  | 5.582  | 0.402  | 0.00 | 0.00 |
| ATOM | 1048 | C2   | RG | 33 | -8.314  | 4.914  | 0.951  | 0.00 | 0.00 |
| ATOM | 1049 | N2   | RG | 33 | -8.827  | 5.289  | -0.177 | 0.00 | 0.00 |
| ATOM | 1050 | H21  | RG | 33 | -8.257  | 5.682  | -0.887 | 0.00 | 0.00 |
| ATOM | 1051 | H22  | RG | 33 | -9.793  | 5.120  | -0.310 | 0.00 | 0.00 |
| ATOM | 1052 | N3   | RG | 33 | -9.107  | 4.318  | 1.823  | 0.00 | 0.00 |
| ATOM | 1053 | C4   | RG | 33 | -8.463  | 3.934  | 2.958  | 0.00 | 0.00 |
| ATOM | 1054 | C3'  | RG | 33 | -10.309 | 0.454  | 3.938  | 0.00 | 0.00 |
| ATOM | 1055 | H3'  | RG | 33 | -9.236  | 0.372  | 3.970  | 0.00 | 0.00 |
| ATOM | 1056 | C2'  | RG | 33 | -10.688 | 1.684  | 3.139  | 0.00 | 0.00 |
| ATOM | 1057 | 1H2' | RG | 33 | -10.083 | 1.773  | 2.252  | 0.00 | 0.00 |
| ATOM | 1058 | O2'  | RG | 33 | -12.058 | 1.730  | 2.820  | 0.00 | 0.00 |
| ATOM | 1059 | 2HO' | RG | 33 | -12.288 | 1.577  | 2.498  | 0.00 | 0.00 |
| ATOM | 1060 | O3'  | RG | 33 | -10.893 | -0.711 | 3.445  | 0.00 | 0.00 |
| ATOM | 1061 | P    | RU | 34 | -10.120 | -1.629 | 2.440  | 0.00 | 0.00 |
| ATOM | 1062 | O1P  | RU | 34 | -11.001 | -2.732 | 2.095  | 0.00 | 0.00 |
| ATOM | 1063 | O2P  | RU | 34 | -8.818  | -1.927 | 3.014  | 0.00 | 0.00 |
| ATOM | 1064 | O5'  | RU | 34 | -9.883  | -0.774 | 1.160  | 0.00 | 0.00 |
| ATOM | 1065 | C5'  | RU | 34 | -10.929 | -0.432 | 0.295  | 0.00 | 0.00 |
| ATOM | 1066 | 1H5' | RU | 34 | -11.680 | 0.109  | 0.821  | 0.00 | 0.00 |
| ATOM | 1067 | 2H5' | RU | 34 | -11.365 | -1.320 | -0.102 | 0.00 | 0.00 |
| ATOM | 1068 | C4'  | RU | 34 | -10.442 | 0.389  | -0.874 | 0.00 | 0.00 |
| ATOM | 1069 | H4'  | RU | 34 | -11.285 | 0.626  | -1.483 | 0.00 | 0.00 |
| ATOM | 1070 | O4'  | RU | 34 | -9.824  | 1.582  | -0.472 | 0.00 | 0.00 |
| ATOM | 1071 | C1'  | RU | 34 | -8.843  | 1.923  | -1.442 | 0.00 | 0.00 |
| ATOM | 1072 | H1'  | RU | 34 | -9.103  | 2.860  | -1.903 | 0.00 | 0.00 |
| ATOM | 1073 | N1   | RU | 34 | -7.483  | 2.058  | -0.870 | 0.00 | 0.00 |
| ATOM | 1074 | C6   | RU | 34 | -7.141  | 1.492  | 0.325  | 0.00 | 0.00 |
| ATOM | 1075 | H6   | RU | 34 | -7.875  | 0.942  | 0.874  | 0.00 | 0.00 |
| ATOM | 1076 | C5   | RU | 34 | -5.888  | 1.622  | 0.814  | 0.00 | 0.00 |
| ATOM | 1077 | H5   | RU | 34 | -5.630  | 1.177  | 1.744  | 0.00 | 0.00 |
| ATOM | 1078 | C4   | RU | 34 | -4.873  | 2.348  | 0.110  | 0.00 | 0.00 |
| ATOM | 1079 | O4   | RU | 34 | -3.726  | 2.508  | 0.476  | 0.00 | 0.00 |
| ATOM | 1080 | N3   | RU | 34 | -5.281  | 2.873  | -1.067 | 0.00 | 0.00 |
| ATOM | 1081 | H3   | RU | 34 | -4.598  | 3.364  | -1.595 | 0.00 | 0.00 |

|      |      |      |    |    |         |        |         |      |      |
|------|------|------|----|----|---------|--------|---------|------|------|
| ATOM | 1082 | C2   | RU | 34 | -6.528  | 2.749  | -1.612  | 0.00 | 0.00 |
| ATOM | 1083 | O2   | RU | 34 | -6.740  | 3.219  | -2.712  | 0.00 | 0.00 |
| ATOM | 1084 | C3'  | RU | 34 | -9.447  | -0.330 | -1.753  | 0.00 | 0.00 |
| ATOM | 1085 | H3'  | RU | 34 | -8.689  | -0.767 | -1.142  | 0.00 | 0.00 |
| ATOM | 1086 | C2'  | RU | 34 | -8.876  | 0.835  | -2.507  | 0.00 | 0.00 |
| ATOM | 1087 | 1H2' | RU | 34 | -7.906  | 0.607  | -2.877  | 0.00 | 0.00 |
| ATOM | 1088 | O2'  | RU | 34 | -9.694  | 1.255  | -3.546  | 0.00 | 0.00 |
| ATOM | 1089 | 2HO' | RU | 34 | -9.932  | 0.648  | -3.906  | 0.00 | 0.00 |
| ATOM | 1090 | O3'  | RU | 34 | -10.057 | -1.272 | -2.588  | 0.00 | 0.00 |
| ATOM | 1091 | P    | RG | 35 | -9.246  | -2.457 | -3.210  | 0.00 | 0.00 |
| ATOM | 1092 | O1P  | RG | 35 | -10.176 | -3.310 | -3.919  | 0.00 | 0.00 |
| ATOM | 1093 | O2P  | RG | 35 | -8.444  | -3.027 | -2.160  | 0.00 | 0.00 |
| ATOM | 1094 | O5'  | RG | 35 | -8.272  | -1.817 | -4.260  | 0.00 | 0.00 |
| ATOM | 1095 | C5'  | RG | 35 | -8.729  | -1.343 | -5.488  | 0.00 | 0.00 |
| ATOM | 1096 | 1H5' | RG | 35 | -9.545  | -0.679 | -5.316  | 0.00 | 0.00 |
| ATOM | 1097 | 2H5' | RG | 35 | -9.070  | -2.150 | -6.095  | 0.00 | 0.00 |
| ATOM | 1098 | C4'  | RG | 35 | -7.663  | -0.596 | -6.250  | 0.00 | 0.00 |
| ATOM | 1099 | H4'  | RG | 35 | -8.112  | -0.179 | -7.123  | 0.00 | 0.00 |
| ATOM | 1100 | O4'  | RG | 35 | -7.109  | 0.435  | -5.483  | 0.00 | 0.00 |
| ATOM | 1101 | C1'  | RG | 35 | -5.774  | 0.622  | -5.892  | 0.00 | 0.00 |
| ATOM | 1102 | H1'  | RG | 35 | -5.651  | 1.593  | -6.337  | 0.00 | 0.00 |
| ATOM | 1103 | N9   | RG | 35 | -4.849  | 0.538  | -4.746  | 0.00 | 0.00 |
| ATOM | 1104 | C8   | RG | 35 | -5.006  | -0.090 | -3.548  | 0.00 | 0.00 |
| ATOM | 1105 | H8   | RG | 35 | -5.876  | -0.657 | -3.302  | 0.00 | 0.00 |
| ATOM | 1106 | N7   | RG | 35 | -4.008  | 0.065  | -2.726  | 0.00 | 0.00 |
| ATOM | 1107 | C5   | RG | 35 | -3.096  | 0.823  | -3.462  | 0.00 | 0.00 |
| ATOM | 1108 | C6   | RG | 35 | -1.786  | 1.318  | -3.147  | 0.00 | 0.00 |
| ATOM | 1109 | O6   | RG | 35 | -1.155  | 1.222  | -2.104  | 0.00 | 0.00 |
| ATOM | 1110 | N1   | RG | 35 | -1.187  | 1.995  | -4.183  | 0.00 | 0.00 |
| ATOM | 1111 | H1   | RG | 35 | -0.267  | 2.345  | -4.037  | 0.00 | 0.00 |
| ATOM | 1112 | C2   | RG | 35 | -1.783  | 2.199  | -5.377  | 0.00 | 0.00 |
| ATOM | 1113 | N2   | RG | 35 | -1.114  | 2.859  | -6.257  | 0.00 | 0.00 |
| ATOM | 1114 | H21  | RG | 35 | -0.194  | 3.171  | -6.058  | 0.00 | 0.00 |
| ATOM | 1115 | H22  | RG | 35 | -1.542  | 3.011  | -7.137  | 0.00 | 0.00 |
| ATOM | 1116 | N3   | RG | 35 | -2.997  | 1.779  | -5.713  | 0.00 | 0.00 |
| ATOM | 1117 | C4   | RG | 35 | -3.602  | 1.093  | -4.709  | 0.00 | 0.00 |
| ATOM | 1118 | C3'  | RG | 35 | -6.525  | -1.477 | -6.705  | 0.00 | 0.00 |
| ATOM | 1119 | H3'  | RG | 35 | -6.239  | -2.116 | -5.897  | 0.00 | 0.00 |
| ATOM | 1120 | C2'  | RG | 35 | -5.451  | -0.438 | -6.931  | 0.00 | 0.00 |
| ATOM | 1121 | 1H2' | RG | 35 | -4.485  | -0.859 | -6.779  | 0.00 | 0.00 |
| ATOM | 1122 | O2'  | RG | 35 | -5.554  | 0.154  | -8.184  | 0.00 | 0.00 |
| ATOM | 1123 | 2HO' | RG | 35 | -5.529  | -0.389 | -8.706  | 0.00 | 0.00 |
| ATOM | 1124 | O3'  | RG | 35 | -6.851  | -2.219 | -7.864  | 0.00 | 0.00 |
| ATOM | 1125 | P    | RC | 36 | -6.013  | -3.467 | -8.314  | 0.00 | 0.00 |
| ATOM | 1126 | O1P  | RC | 36 | -6.733  | -4.118 | -9.397  | 0.00 | 0.00 |
| ATOM | 1127 | O2P  | RC | 36 | -5.702  | -4.237 | -7.122  | 0.00 | 0.00 |
| ATOM | 1128 | O5'  | RC | 36 | -4.665  | -2.900 | -8.892  | 0.00 | 0.00 |
| ATOM | 1129 | C5'  | RC | 36 | -4.563  | -2.314 | -10.168 | 0.00 | 0.00 |
| ATOM | 1130 | 1H5' | RC | 36 | -5.298  | -1.546 | -10.264 | 0.00 | 0.00 |
| ATOM | 1131 | 2H5' | RC | 36 | -4.744  | -3.053 | -10.924 | 0.00 | 0.00 |
| ATOM | 1132 | C4'  | RC | 36 | -3.191  | -1.711 | -10.414 | 0.00 | 0.00 |
| ATOM | 1133 | H4'  | RC | 36 | -3.199  | -1.242 | -11.381 | 0.00 | 0.00 |
| ATOM | 1134 | O4'  | RC | 36 | -2.872  | -0.736 | -9.443  | 0.00 | 0.00 |
| ATOM | 1135 | C1'  | RC | 36 | -1.476  | -0.763 | -9.186  | 0.00 | 0.00 |
| ATOM | 1136 | H1'  | RC | 36 | -1.061  | 0.196  | -9.434  | 0.00 | 0.00 |
| ATOM | 1137 | N1   | RC | 36 | -1.163  | -1.050 | -7.760  | 0.00 | 0.00 |
| ATOM | 1138 | C6   | RC | 36 | -1.947  | -1.850 | -6.996  | 0.00 | 0.00 |
| ATOM | 1139 | H6   | RC | 36 | -2.792  | -2.324 | -7.432  | 0.00 | 0.00 |
| ATOM | 1140 | C5   | RC | 36 | -1.679  | -2.035 | -5.692  | 0.00 | 0.00 |
| ATOM | 1141 | H5   | RC | 36 | -2.307  | -2.655 | -5.100  | 0.00 | 0.00 |
| ATOM | 1142 | C4   | RC | 36 | -0.571  | -1.367 | -5.165  | 0.00 | 0.00 |
| ATOM | 1143 | N4   | RC | 36 | -0.289  | -1.478 | -3.912  | 0.00 | 0.00 |
| ATOM | 1144 | H41  | RC | 36 | 0.510   | -1.004 | -3.578  | 0.00 | 0.00 |
| ATOM | 1145 | H42  | RC | 36 | -0.860  | -2.019 | -3.320  | 0.00 | 0.00 |
| ATOM | 1146 | N3   | RC | 36 | 0.231   | -0.637 | -5.887  | 0.00 | 0.00 |
| ATOM | 1147 | C2   | RC | 36 | -0.037  | -0.474 | -7.196  | 0.00 | 0.00 |
| ATOM | 1148 | O2   | RC | 36 | 0.736   | 0.191  | -7.858  | 0.00 | 0.00 |
| ATOM | 1149 | C3'  | RC | 36 | -2.057  | -2.716 | -10.389 | 0.00 | 0.00 |

|      |      |      |    |    |        |        |         |      |      |
|------|------|------|----|----|--------|--------|---------|------|------|
| ATOM | 1150 | H3'  | RC | 36 | -2.201 | -3.367 | -9.551  | 0.00 | 0.00 |
| ATOM | 1151 | C2'  | RC | 36 | -0.883 | -1.803 | -10.114 | 0.00 | 0.00 |
| ATOM | 1152 | 1H2' | RC | 36 | -0.082 | -2.330 | -9.646  | 0.00 | 0.00 |
| ATOM | 1153 | O2'  | RC | 36 | -0.441 | -1.163 | -11.272 | 0.00 | 0.00 |
| ATOM | 1154 | 2HO' | RC | 36 | -0.173 | -1.499 | -11.659 | 0.00 | 0.00 |
| ATOM | 1155 | O3'  | RC | 36 | -1.941 | -3.447 | -11.581 | 0.00 | 0.00 |
| ATOM | 1156 | P    | RA | 37 | -1.208 | -4.827 | -11.623 | 0.00 | 0.00 |
| ATOM | 1157 | O1P  | RA | 37 | -1.384 | -5.351 | -12.960 | 0.00 | 0.00 |
| ATOM | 1158 | O2P  | RA | 37 | -1.660 | -5.610 | -10.500 | 0.00 | 0.00 |
| ATOM | 1159 | O5'  | RA | 37 | 0.323  | -4.537 | -11.394 | 0.00 | 0.00 |
| ATOM | 1160 | C5'  | RA | 37 | 1.151  | -4.038 | -12.402 | 0.00 | 0.00 |
| ATOM | 1161 | 1H5' | RA | 37 | 0.707  | -3.168 | -12.829 | 0.00 | 0.00 |
| ATOM | 1162 | 2H5' | RA | 37 | 1.245  | -4.773 | -13.164 | 0.00 | 0.00 |
| ATOM | 1163 | C4'  | RA | 37 | 2.540  | -3.688 | -11.894 | 0.00 | 0.00 |
| ATOM | 1164 | H4'  | RA | 37 | 3.103  | -3.307 | -12.725 | 0.00 | 0.00 |
| ATOM | 1165 | O4'  | RA | 37 | 2.494  | -2.695 | -10.897 | 0.00 | 0.00 |
| ATOM | 1166 | C1'  | RA | 37 | 3.481  | -2.964 | -9.922  | 0.00 | 0.00 |
| ATOM | 1167 | H1'  | RA | 37 | 4.115  | -2.104 | -9.794  | 0.00 | 0.00 |
| ATOM | 1168 | N9   | RA | 37 | 2.866  | -3.286 | -8.623  | 0.00 | 0.00 |
| ATOM | 1169 | C8   | RA | 37 | 1.682  | -3.888 | -8.352  | 0.00 | 0.00 |
| ATOM | 1170 | H8   | RA | 37 | 1.034  | -4.253 | -9.111  | 0.00 | 0.00 |
| ATOM | 1171 | N7   | RA | 37 | 1.379  | -3.940 | -7.094  | 0.00 | 0.00 |
| ATOM | 1172 | C5   | RA | 37 | 2.488  | -3.381 | -6.483  | 0.00 | 0.00 |
| ATOM | 1173 | C6   | RA | 37 | 2.871  | -3.138 | -5.158  | 0.00 | 0.00 |
| ATOM | 1174 | N6   | RA | 37 | 2.150  | -3.395 | -4.106  | 0.00 | 0.00 |
| ATOM | 1175 | H61  | RA | 37 | 2.494  | -3.147 | -3.214  | 0.00 | 0.00 |
| ATOM | 1176 | H62  | RA | 37 | 1.253  | -3.756 | -4.220  | 0.00 | 0.00 |
| ATOM | 1177 | N1   | RA | 37 | 4.053  | -2.618 | -4.873  | 0.00 | 0.00 |
| ATOM | 1178 | C2   | RA | 37 | 4.855  | -2.337 | -5.882  | 0.00 | 0.00 |
| ATOM | 1179 | H2   | RA | 37 | 5.795  | -1.915 | -5.621  | 0.00 | 0.00 |
| ATOM | 1180 | N3   | RA | 37 | 4.625  | -2.486 | -7.173  | 0.00 | 0.00 |
| ATOM | 1181 | C4   | RA | 37 | 3.415  | -3.021 | -7.404  | 0.00 | 0.00 |
| ATOM | 1182 | C3'  | RA | 37 | 3.317  | -4.856 | -11.308 | 0.00 | 0.00 |
| ATOM | 1183 | H3'  | RA | 37 | 2.664  | -5.433 | -10.677 | 0.00 | 0.00 |
| ATOM | 1184 | C2'  | RA | 37 | 4.313  | -4.119 | -10.436 | 0.00 | 0.00 |
| ATOM | 1185 | 1H2' | RA | 37 | 4.653  | -4.746 | -9.635  | 0.00 | 0.00 |
| ATOM | 1186 | O2'  | RA | 37 | 5.399  | -3.601 | -11.155 | 0.00 | 0.00 |
| ATOM | 1187 | 2HO' | RA | 37 | 5.719  | -3.871 | -11.389 | 0.00 | 0.00 |
| ATOM | 1188 | O3'  | RA | 37 | 3.944  | -5.664 | -12.275 | 0.00 | 0.00 |
| ATOM | 1189 | P    | RC | 38 | 4.169  | -7.186 | -12.035 | 0.00 | 0.00 |
| ATOM | 1190 | O1P  | RC | 38 | 4.813  | -7.713 | -13.233 | 0.00 | 0.00 |
| ATOM | 1191 | O2P  | RC | 38 | 2.908  | -7.763 | -11.593 | 0.00 | 0.00 |
| ATOM | 1192 | O5'  | RC | 38 | 5.193  | -7.255 | -10.845 | 0.00 | 0.00 |
| ATOM | 1193 | C5'  | RC | 38 | 6.556  | -6.969 | -11.025 | 0.00 | 0.00 |
| ATOM | 1194 | 1H5' | RC | 38 | 6.661  | -6.031 | -11.535 | 0.00 | 0.00 |
| ATOM | 1195 | 2H5' | RC | 38 | 7.012  | -7.730 | -11.635 | 0.00 | 0.00 |
| ATOM | 1196 | C4'  | RC | 38 | 7.298  | -6.903 | -9.694  | 0.00 | 0.00 |
| ATOM | 1197 | H4'  | RC | 38 | 8.326  | -6.664 | -9.894  | 0.00 | 0.00 |
| ATOM | 1198 | O4'  | RC | 38 | 6.757  | -5.898 | -8.861  | 0.00 | 0.00 |
| ATOM | 1199 | C1'  | RC | 38 | 6.900  | -6.278 | -7.510  | 0.00 | 0.00 |
| ATOM | 1200 | H1'  | RC | 38 | 7.536  | -5.565 | -7.009  | 0.00 | 0.00 |
| ATOM | 1201 | N1   | RC | 38 | 5.597  | -6.331 | -6.802  | 0.00 | 0.00 |
| ATOM | 1202 | C6   | RC | 38 | 4.454  | -6.701 | -7.439  | 0.00 | 0.00 |
| ATOM | 1203 | H6   | RC | 38 | 4.468  | -6.896 | -8.485  | 0.00 | 0.00 |
| ATOM | 1204 | C5   | RC | 38 | 3.306  | -6.818 | -6.750  | 0.00 | 0.00 |
| ATOM | 1205 | H5   | RC | 38 | 2.418  | -7.108 | -7.254  | 0.00 | 0.00 |
| ATOM | 1206 | C4   | RC | 38 | 3.345  | -6.568 | -5.370  | 0.00 | 0.00 |
| ATOM | 1207 | N4   | RC | 38 | 2.283  | -6.680 | -4.660  | 0.00 | 0.00 |
| ATOM | 1208 | H41  | RC | 38 | 2.358  | -6.443 | -3.704  | 0.00 | 0.00 |
| ATOM | 1209 | H42  | RC | 38 | 1.426  | -6.886 | -5.083  | 0.00 | 0.00 |
| ATOM | 1210 | N3   | RC | 38 | 4.433  | -6.226 | -4.740  | 0.00 | 0.00 |
| ATOM | 1211 | C2   | RC | 38 | 5.572  | -6.094 | -5.435  | 0.00 | 0.00 |
| ATOM | 1212 | O2   | RC | 38 | 6.582  | -5.795 | -4.822  | 0.00 | 0.00 |
| ATOM | 1213 | C3'  | RC | 38 | 7.273  | -8.180 | -8.883  | 0.00 | 0.00 |
| ATOM | 1214 | H3'  | RC | 38 | 6.275  | -8.573 | -8.887  | 0.00 | 0.00 |
| ATOM | 1215 | C2'  | RC | 38 | 7.586  | -7.625 | -7.499  | 0.00 | 0.00 |
| ATOM | 1216 | 1H2' | RC | 38 | 7.186  | -8.275 | -6.738  | 0.00 | 0.00 |
| ATOM | 1217 | O2'  | RC | 38 | 8.961  | -7.422 | -7.294  | 0.00 | 0.00 |

|      |      |      |    |    |        |         |        |      |      |
|------|------|------|----|----|--------|---------|--------|------|------|
| ATOM | 1218 | 2HO' | RC | 38 | 9.328  | -8.195  | -7.216 | 0.00 | 0.00 |
| ATOM | 1219 | O3'  | RC | 38 | 8.187  | -9.146  | -9.337 | 0.00 | 0.00 |
| ATOM | 1220 | P    | RA | 39 | 8.268  | -10.573 | -8.681 | 0.00 | 0.00 |
| ATOM | 1221 | O1P  | RA | 39 | 9.167  | -11.370 | -9.485 | 0.00 | 0.00 |
| ATOM | 1222 | O2P  | RA | 39 | 6.918  | -11.038 | -8.458 | 0.00 | 0.00 |
| ATOM | 1223 | O5'  | RA | 39 | 8.970  | -10.307 | -7.297 | 0.00 | 0.00 |
| ATOM | 1224 | C5'  | RA | 39 | 8.731  | -11.068 | -6.168 | 0.00 | 0.00 |
| ATOM | 1225 | 1H5' | RA | 39 | 9.195  | -12.009 | -6.282 | 0.00 | 0.00 |
| ATOM | 1226 | 2H5' | RA | 39 | 7.700  | -11.211 | -6.021 | 0.00 | 0.00 |
| ATOM | 1227 | C4'  | RA | 39 | 9.301  | -10.361 | -4.964 | 0.00 | 0.00 |
| ATOM | 1228 | H4'  | RA | 39 | 10.288 | -10.030 | -5.196 | 0.00 | 0.00 |
| ATOM | 1229 | O4'  | RA | 39 | 8.514  | -9.257  | -4.603 | 0.00 | 0.00 |
| ATOM | 1230 | C1'  | RA | 39 | 8.541  | -9.068  | -3.211 | 0.00 | 0.00 |
| ATOM | 1231 | H1'  | RA | 39 | 8.926  | -8.095  | -2.979 | 0.00 | 0.00 |
| ATOM | 1232 | N9   | RA | 39 | 7.184  | -9.171  | -2.654 | 0.00 | 0.00 |
| ATOM | 1233 | C8   | RA | 39 | 6.014  | -9.364  | -3.319 | 0.00 | 0.00 |
| ATOM | 1234 | H8   | RA | 39 | 5.968  | -9.496  | -4.369 | 0.00 | 0.00 |
| ATOM | 1235 | N7   | RA | 39 | 4.970  | -9.385  | -2.561 | 0.00 | 0.00 |
| ATOM | 1236 | C5   | RA | 39 | 5.493  | -9.163  | -1.298 | 0.00 | 0.00 |
| ATOM | 1237 | C6   | RA | 39 | 4.965  | -9.070  | -0.006 | 0.00 | 0.00 |
| ATOM | 1238 | N6   | RA | 39 | 3.706  | -9.188  | 0.292  | 0.00 | 0.00 |
| ATOM | 1239 | H61  | RA | 39 | 3.445  | -9.100  | 1.234  | 0.00 | 0.00 |
| ATOM | 1240 | H62  | RA | 39 | 3.045  | -9.373  | -0.408 | 0.00 | 0.00 |
| ATOM | 1241 | N1   | RA | 39 | 5.738  | -8.852  | 1.031  | 0.00 | 0.00 |
| ATOM | 1242 | C2   | RA | 39 | 7.020  | -8.703  | 0.814  | 0.00 | 0.00 |
| ATOM | 1243 | H2   | RA | 39 | 7.623  | -8.512  | 1.665  | 0.00 | 0.00 |
| ATOM | 1244 | N3   | RA | 39 | 7.661  | -8.766  | -0.324 | 0.00 | 0.00 |
| ATOM | 1245 | C4   | RA | 39 | 6.836  | -9.012  | -1.362 | 0.00 | 0.00 |
| ATOM | 1246 | C3'  | RA | 39 | 9.365  | -11.226 | -3.719 | 0.00 | 0.00 |
| ATOM | 1247 | H3'  | RA | 39 | 8.442  | -11.768 | -3.613 | 0.00 | 0.00 |
| ATOM | 1248 | C2'  | RA | 39 | 9.458  | -10.150 | -2.651 | 0.00 | 0.00 |
| ATOM | 1249 | 1H2' | RA | 39 | 9.125  | -10.513 | -1.696 | 0.00 | 0.00 |
| ATOM | 1250 | O2'  | RA | 39 | 10.757 | -9.628  | -2.560 | 0.00 | 0.00 |
| ATOM | 1251 | 2HO' | RA | 39 | 11.164 | -9.967  | -2.485 | 0.00 | 0.00 |
| ATOM | 1252 | O3'  | RA | 39 | 10.472 | -12.096 | -3.719 | 0.00 | 0.00 |
| ATOM | 1253 | P    | RC | 40 | 10.424 | -13.479 | -2.985 | 0.00 | 0.00 |
| ATOM | 1254 | O1P  | RC | 40 | 11.764 | -14.046 | -3.051 | 0.00 | 0.00 |
| ATOM | 1255 | O2P  | RC | 40 | 9.306  | -14.246 | -3.516 | 0.00 | 0.00 |
| ATOM | 1256 | O5'  | RC | 40 | 10.081 | -13.168 | -1.483 | 0.00 | 0.00 |
| ATOM | 1257 | C5'  | RC | 40 | 11.013 | -12.635 | -0.580 | 0.00 | 0.00 |
| ATOM | 1258 | 1H5' | RC | 40 | 11.365 | -11.683 | -0.931 | 0.00 | 0.00 |
| ATOM | 1259 | 2H5' | RC | 40 | 11.850 | -13.302 | -0.490 | 0.00 | 0.00 |
| ATOM | 1260 | C4'  | RC | 40 | 10.384 | -12.454 | 0.801  | 0.00 | 0.00 |
| ATOM | 1261 | H4'  | RC | 40 | 11.148 | -12.109 | 1.477  | 0.00 | 0.00 |
| ATOM | 1262 | O4'  | RC | 40 | 9.331  | -11.513 | 0.803  | 0.00 | 0.00 |
| ATOM | 1263 | C1'  | RC | 40 | 8.324  | -11.939 | 1.710  | 0.00 | 0.00 |
| ATOM | 1264 | H1'  | RC | 40 | 8.139  | -11.175 | 2.447  | 0.00 | 0.00 |
| ATOM | 1265 | N1   | RC | 40 | 7.046  | -12.238 | 1.018  | 0.00 | 0.00 |
| ATOM | 1266 | C6   | RC | 40 | 6.982  | -12.462 | -0.324 | 0.00 | 0.00 |
| ATOM | 1267 | H6   | RC | 40 | 7.878  | -12.478 | -0.903 | 0.00 | 0.00 |
| ATOM | 1268 | C5   | RC | 40 | 5.802  | -12.633 | -0.941 | 0.00 | 0.00 |
| ATOM | 1269 | H5   | RC | 40 | 5.762  | -12.789 | -1.995 | 0.00 | 0.00 |
| ATOM | 1270 | C4   | RC | 40 | 4.648  | -12.590 | -0.148 | 0.00 | 0.00 |
| ATOM | 1271 | N4   | RC | 40 | 3.490  | -12.705 | -0.701 | 0.00 | 0.00 |
| ATOM | 1272 | H41  | RC | 40 | 2.685  | -12.664 | -0.118 | 0.00 | 0.00 |
| ATOM | 1273 | H42  | RC | 40 | 3.437  | -12.791 | -1.678 | 0.00 | 0.00 |
| ATOM | 1274 | N3   | RC | 40 | 4.669  | -12.397 | 1.146  | 0.00 | 0.00 |
| ATOM | 1275 | C2   | RC | 40 | 5.861  | -12.231 | 1.756  | 0.00 | 0.00 |
| ATOM | 1276 | O2   | RC | 40 | 5.860  | -12.061 | 2.964  | 0.00 | 0.00 |
| ATOM | 1277 | C3'  | RC | 40 | 9.809  | -13.730 | 1.377  | 0.00 | 0.00 |
| ATOM | 1278 | H3'  | RC | 40 | 9.236  | -14.230 | 0.614  | 0.00 | 0.00 |
| ATOM | 1279 | C2'  | RC | 40 | 8.872  | -13.164 | 2.420  | 0.00 | 0.00 |
| ATOM | 1280 | 1H2' | RC | 40 | 8.101  | -13.869 | 2.680  | 0.00 | 0.00 |
| ATOM | 1281 | O2'  | RC | 40 | 9.527  | -12.730 | 3.589  | 0.00 | 0.00 |
| ATOM | 1282 | 2HO' | RC | 40 | 9.883  | -13.081 | 3.851  | 0.00 | 0.00 |
| ATOM | 1283 | O3'  | RC | 40 | 10.787 | -14.579 | 1.919  | 0.00 | 0.00 |
| ATOM | 1284 | P    | RA | 41 | 10.583 | -16.137 | 1.982  | 0.00 | 0.00 |
| ATOM | 1285 | O1P  | RA | 41 | 11.796 | -16.719 | 2.532  | 0.00 | 0.00 |

|      |      |      |    |    |        |         |        |      |      |
|------|------|------|----|----|--------|---------|--------|------|------|
| ATOM | 1286 | O2P  | RA | 41 | 10.111 | -16.587 | 0.679  | 0.00 | 0.00 |
| ATOM | 1287 | O5'  | RA | 41 | 9.410  | -16.363 | 3.007  | 0.00 | 0.00 |
| ATOM | 1288 | C5'  | RA | 41 | 9.582  | -16.201 | 4.387  | 0.00 | 0.00 |
| ATOM | 1289 | 1H5' | RA | 41 | 10.071 | -15.268 | 4.572  | 0.00 | 0.00 |
| ATOM | 1290 | 2H5' | RA | 41 | 10.207 | -16.982 | 4.764  | 0.00 | 0.00 |
| ATOM | 1291 | C4'  | RA | 41 | 8.264  | -16.214 | 5.139  | 0.00 | 0.00 |
| ATOM | 1292 | H4'  | RA | 41 | 8.488  | -16.068 | 6.179  | 0.00 | 0.00 |
| ATOM | 1293 | O4'  | RA | 41 | 7.403  | -15.177 | 4.708  | 0.00 | 0.00 |
| ATOM | 1294 | C1'  | RA | 41 | 6.074  | -15.634 | 4.758  | 0.00 | 0.00 |
| ATOM | 1295 | H1'  | RA | 41 | 5.462  | -14.960 | 5.326  | 0.00 | 0.00 |
| ATOM | 1296 | N9   | RA | 41 | 5.513  | -15.735 | 3.409  | 0.00 | 0.00 |
| ATOM | 1297 | C8   | RA | 41 | 6.142  | -15.845 | 2.209  | 0.00 | 0.00 |
| ATOM | 1298 | H8   | RA | 41 | 7.203  | -15.913 | 2.117  | 0.00 | 0.00 |
| ATOM | 1299 | N7   | RA | 41 | 5.347  | -15.852 | 1.186  | 0.00 | 0.00 |
| ATOM | 1300 | C5   | RA | 41 | 4.084  | -15.764 | 1.768  | 0.00 | 0.00 |
| ATOM | 1301 | C6   | RA | 41 | 2.759  | -15.735 | 1.299  | 0.00 | 0.00 |
| ATOM | 1302 | N6   | RA | 41 | 2.409  | -15.736 | 0.041  | 0.00 | 0.00 |
| ATOM | 1303 | H61  | RA | 41 | 1.451  | -15.646 | -0.182 | 0.00 | 0.00 |
| ATOM | 1304 | H62  | RA | 41 | 3.113  | -15.753 | -0.653 | 0.00 | 0.00 |
| ATOM | 1305 | N1   | RA | 41 | 1.735  | -15.668 | 2.126  | 0.00 | 0.00 |
| ATOM | 1306 | C2   | RA | 41 | 1.988  | -15.647 | 3.406  | 0.00 | 0.00 |
| ATOM | 1307 | H2   | RA | 41 | 1.145  | -15.596 | 4.055  | 0.00 | 0.00 |
| ATOM | 1308 | N3   | RA | 41 | 3.165  | -15.660 | 4.006  | 0.00 | 0.00 |
| ATOM | 1309 | C4   | RA | 41 | 4.181  | -15.724 | 3.119  | 0.00 | 0.00 |
| ATOM | 1310 | C3'  | RA | 41 | 7.479  | -17.499 | 5.038  | 0.00 | 0.00 |
| ATOM | 1311 | H3'  | RA | 41 | 7.463  | -17.795 | 4.009  | 0.00 | 0.00 |
| ATOM | 1312 | C2'  | RA | 41 | 6.107  | -16.990 | 5.443  | 0.00 | 0.00 |
| ATOM | 1313 | 1H2' | RA | 41 | 5.331  | -17.629 | 5.074  | 0.00 | 0.00 |
| ATOM | 1314 | O2'  | RA | 41 | 5.981  | -16.802 | 6.826  | 0.00 | 0.00 |
| ATOM | 1315 | 2HO' | RA | 41 | 5.774  | -17.168 | 7.131  | 0.00 | 0.00 |
| ATOM | 1316 | O3'  | RA | 41 | 7.969  | -18.539 | 5.854  | 0.00 | 0.00 |
| ATOM | 1317 | P    | RG | 42 | 7.574  | -20.029 | 5.579  | 0.00 | 0.00 |
| ATOM | 1318 | O1P  | RG | 42 | 8.340  | -20.868 | 6.489  | 0.00 | 0.00 |
| ATOM | 1319 | O2P  | RG | 42 | 7.675  | -20.264 | 4.151  | 0.00 | 0.00 |
| ATOM | 1320 | O5'  | RG | 42 | 6.051  | -20.163 | 5.960  | 0.00 | 0.00 |
| ATOM | 1321 | C5'  | RG | 42 | 5.615  | -20.163 | 7.293  | 0.00 | 0.00 |
| ATOM | 1322 | 1H5' | RG | 42 | 6.031  | -19.324 | 7.813  | 0.00 | 0.00 |
| ATOM | 1323 | 2H5' | RG | 42 | 5.951  | -21.056 | 7.772  | 0.00 | 0.00 |
| ATOM | 1324 | C4'  | RG | 42 | 4.098  | -20.101 | 7.396  | 0.00 | 0.00 |
| ATOM | 1325 | H4'  | RG | 42 | 3.838  | -20.024 | 8.436  | 0.00 | 0.00 |
| ATOM | 1326 | O4'  | RG | 42 | 3.552  | -18.977 | 6.734  | 0.00 | 0.00 |
| ATOM | 1327 | C1'  | RG | 42 | 2.321  | -19.342 | 6.156  | 0.00 | 0.00 |
| ATOM | 1328 | H1'  | RG | 42 | 1.539  | -18.670 | 6.475  | 0.00 | 0.00 |
| ATOM | 1329 | N9   | RG | 42 | 2.387  | -19.280 | 4.684  | 0.00 | 0.00 |
| ATOM | 1330 | C8   | RG | 42 | 3.471  | -19.287 | 3.854  | 0.00 | 0.00 |
| ATOM | 1331 | H8   | RG | 42 | 4.462  | -19.368 | 4.237  | 0.00 | 0.00 |
| ATOM | 1332 | N7   | RG | 42 | 3.201  | -19.166 | 2.603  | 0.00 | 0.00 |
| ATOM | 1333 | C5   | RG | 42 | 1.815  | -19.115 | 2.578  | 0.00 | 0.00 |
| ATOM | 1334 | C6   | RG | 42 | 0.896  | -18.995 | 1.494  | 0.00 | 0.00 |
| ATOM | 1335 | O6   | RG | 42 | 1.112  | -18.836 | 0.307  | 0.00 | 0.00 |
| ATOM | 1336 | N1   | RG | 42 | -0.411 | -19.086 | 1.881  | 0.00 | 0.00 |
| ATOM | 1337 | H1   | RG | 42 | -1.103 | -19.077 | 1.168  | 0.00 | 0.00 |
| ATOM | 1338 | C2   | RG | 42 | -0.801 | -19.243 | 3.154  | 0.00 | 0.00 |
| ATOM | 1339 | N2   | RG | 42 | -2.065 | -19.390 | 3.366  | 0.00 | 0.00 |
| ATOM | 1340 | H21  | RG | 42 | -2.683 | -19.458 | 2.594  | 0.00 | 0.00 |
| ATOM | 1341 | H22  | RG | 42 | -2.376 | -19.519 | 4.292  | 0.00 | 0.00 |
| ATOM | 1342 | N3   | RG | 42 | 0.011  | -19.304 | 4.190  | 0.00 | 0.00 |
| ATOM | 1343 | C4   | RG | 42 | 1.317  | -19.238 | 3.841  | 0.00 | 0.00 |
| ATOM | 1344 | C3'  | RG | 42 | 3.399  | -21.319 | 6.833  | 0.00 | 0.00 |
| ATOM | 1345 | H3'  | RG | 42 | 3.820  | -21.570 | 5.875  | 0.00 | 0.00 |
| ATOM | 1346 | C2'  | RG | 42 | 1.998  | -20.752 | 6.632  | 0.00 | 0.00 |
| ATOM | 1347 | 1H2' | RG | 42 | 1.464  | -21.314 | 5.887  | 0.00 | 0.00 |
| ATOM | 1348 | O2'  | RG | 42 | 1.259  | -20.665 | 7.823  | 0.00 | 0.00 |
| ATOM | 1349 | 2HO' | RG | 42 | 1.256  | -20.919 | 8.138  | 0.00 | 0.00 |
| ATOM | 1350 | O3'  | RG | 42 | 3.427  | -22.417 | 7.708  | 0.00 | 0.00 |
| ATOM | 1351 | P    | RC | 43 | 3.271  | -23.884 | 7.186  | 0.00 | 0.00 |
| ATOM | 1352 | O1P  | RC | 43 | 3.370  | -24.767 | 8.329  | 0.00 | 0.00 |
| ATOM | 1353 | O2P  | RC | 43 | 4.190  | -24.071 | 6.090  | 0.00 | 0.00 |



|      |      |      |    |    |        |         |        |      |      |
|------|------|------|----|----|--------|---------|--------|------|------|
| ATOM | 1354 | O5'  | RC | 43 | 1.823  | -24.002 | 6.608  | 0.00 | 0.00 |
| ATOM | 1355 | C5'  | RC | 43 | 0.693  | -24.073 | 7.427  | 0.00 | 0.00 |
| ATOM | 1356 | 1H5' | RC | 43 | 0.686  | -23.259 | 8.127  | 0.00 | 0.00 |
| ATOM | 1357 | 2H5' | RC | 43 | 0.707  | -24.988 | 7.982  | 0.00 | 0.00 |
| ATOM | 1358 | C4'  | RC | 43 | -0.591 | -24.034 | 6.634  | 0.00 | 0.00 |
| ATOM | 1359 | H4'  | RC | 43 | -1.399 | -24.082 | 7.334  | 0.00 | 0.00 |
| ATOM | 1360 | O4'  | RC | 43 | -0.740 | -22.861 | 5.874  | 0.00 | 0.00 |
| ATOM | 1361 | C1'  | RC | 43 | -1.446 | -23.159 | 4.691  | 0.00 | 0.00 |
| ATOM | 1362 | H1'  | RC | 43 | -2.341 | -22.563 | 4.653  | 0.00 | 0.00 |
| ATOM | 1363 | N1   | RC | 43 | -0.642 | -22.906 | 3.474  | 0.00 | 0.00 |
| ATOM | 1364 | C6   | RC | 43 | 0.719  | -22.913 | 3.495  | 0.00 | 0.00 |
| ATOM | 1365 | H6   | RC | 43 | 1.239  | -23.122 | 4.394  | 0.00 | 0.00 |
| ATOM | 1366 | C5   | RC | 43 | 1.415  | -22.658 | 2.377  | 0.00 | 0.00 |
| ATOM | 1367 | H5   | RC | 43 | 2.478  | -22.650 | 2.393  | 0.00 | 0.00 |
| ATOM | 1368 | C4   | RC | 43 | 0.691  | -22.386 | 1.213  | 0.00 | 0.00 |
| ATOM | 1369 | N4   | RC | 43 | 1.308  | -22.105 | 0.122  | 0.00 | 0.00 |
| ATOM | 1370 | H41  | RC | 43 | 0.761  | -21.869 | -0.663 | 0.00 | 0.00 |
| ATOM | 1371 | H42  | RC | 43 | 2.287  | -22.073 | 0.120  | 0.00 | 0.00 |
| ATOM | 1372 | N3   | RC | 43 | -0.614 | -22.388 | 1.168  | 0.00 | 0.00 |
| ATOM | 1373 | C2   | RC | 43 | -1.304 | -22.668 | 2.281  | 0.00 | 0.00 |
| ATOM | 1374 | O2   | RC | 43 | -2.513 | -22.717 | 2.191  | 0.00 | 0.00 |
| ATOM | 1375 | C3'  | RC | 43 | -0.749 | -25.176 | 5.664  | 0.00 | 0.00 |
| ATOM | 1376 | H3'  | RC | 43 | 0.152  | -25.281 | 5.095  | 0.00 | 0.00 |
| ATOM | 1377 | C2'  | RC | 43 | -1.840 | -24.617 | 4.783  | 0.00 | 0.00 |
| ATOM | 1378 | 1H2' | RC | 43 | -1.841 | -25.095 | 3.826  | 0.00 | 0.00 |
| ATOM | 1379 | O2'  | RC | 43 | -3.106 | -24.679 | 5.368  | 0.00 | 0.00 |
| ATOM | 1380 | 2HO' | RC | 43 | -3.331 | -25.097 | 5.442  | 0.00 | 0.00 |
| ATOM | 1381 | O3'  | RC | 43 | -1.107 | -26.378 | 6.270  | 0.00 | 0.00 |
| ATOM | 1382 | P    | RA | 44 | -0.755 | -27.740 | 5.603  | 0.00 | 0.00 |
| ATOM | 1383 | O1P  | RA | 44 | -1.180 | -28.789 | 6.502  | 0.00 | 0.00 |
| ATOM | 1384 | O2P  | RA | 44 | 0.626  | -27.700 | 5.205  | 0.00 | 0.00 |
| ATOM | 1385 | O5'  | RA | 44 | -1.618 | -27.809 | 4.301  | 0.00 | 0.00 |
| ATOM | 1386 | C5'  | RA | 44 | -2.992 | -28.033 | 4.348  | 0.00 | 0.00 |
| ATOM | 1387 | 1H5' | RA | 44 | -3.464 | -27.335 | 5.005  | 0.00 | 0.00 |
| ATOM | 1388 | 2H5' | RA | 44 | -3.169 | -29.008 | 4.730  | 0.00 | 0.00 |
| ATOM | 1389 | C4'  | RA | 44 | -3.637 | -27.904 | 2.984  | 0.00 | 0.00 |
| ATOM | 1390 | H4'  | RA | 44 | -4.686 | -28.079 | 3.096  | 0.00 | 0.00 |
| ATOM | 1391 | O4'  | RA | 44 | -3.472 | -26.620 | 2.445  | 0.00 | 0.00 |
| ATOM | 1392 | C1'  | RA | 44 | -3.393 | -26.727 | 1.042  | 0.00 | 0.00 |
| ATOM | 1393 | H1'  | RA | 44 | -4.164 | -26.143 | 0.575  | 0.00 | 0.00 |
| ATOM | 1394 | N9   | RA | 44 | -2.085 | -26.275 | 0.558  | 0.00 | 0.00 |
| ATOM | 1395 | C8   | RA | 44 | -0.901 | -26.166 | 1.227  | 0.00 | 0.00 |
| ATOM | 1396 | H8   | RA | 44 | -0.781 | -26.454 | 2.244  | 0.00 | 0.00 |
| ATOM | 1397 | N7   | RA | 44 | 0.066  | -25.679 | 0.524  | 0.00 | 0.00 |
| ATOM | 1398 | C5   | RA | 44 | -0.530 | -25.462 | -0.716 | 0.00 | 0.00 |
| ATOM | 1399 | C6   | RA | 44 | -0.109 | -24.943 | -1.950 | 0.00 | 0.00 |
| ATOM | 1400 | N6   | RA | 44 | 1.075  | -24.473 | -2.197 | 0.00 | 0.00 |
| ATOM | 1401 | H61  | RA | 44 | 1.249  | -24.108 | -3.098 | 0.00 | 0.00 |
| ATOM | 1402 | H62  | RA | 44 | 1.739  | -24.428 | -1.471 | 0.00 | 0.00 |
| ATOM | 1403 | N1   | RA | 44 | -0.930 | -24.892 | -2.989 | 0.00 | 0.00 |
| ATOM | 1404 | C2   | RA | 44 | -2.149 | -25.337 | -2.831 | 0.00 | 0.00 |
| ATOM | 1405 | H2   | RA | 44 | -2.783 | -25.270 | -3.685 | 0.00 | 0.00 |
| ATOM | 1406 | N3   | RA | 44 | -2.693 | -25.835 | -1.746 | 0.00 | 0.00 |
| ATOM | 1407 | C4   | RA | 44 | -1.824 | -25.865 | -0.711 | 0.00 | 0.00 |
| ATOM | 1408 | C3'  | RA | 44 | -3.104 | -28.868 | 1.943  | 0.00 | 0.00 |
| ATOM | 1409 | H3'  | RA | 44 | -2.033 | -28.847 | 1.964  | 0.00 | 0.00 |
| ATOM | 1410 | C2'  | RA | 44 | -3.583 | -28.183 | 0.687  | 0.00 | 0.00 |
| ATOM | 1411 | 1H2' | RA | 44 | -2.981 | -28.469 | -0.155 | 0.00 | 0.00 |
| ATOM | 1412 | O2'  | RA | 44 | -4.940 | -28.396 | 0.437  | 0.00 | 0.00 |
| ATOM | 1413 | 2HO' | RA | 44 | -5.148 | -28.797 | 0.166  | 0.00 | 0.00 |
| ATOM | 1414 | O3'  | RA | 44 | -3.571 | -30.167 | 2.102  | 0.00 | 0.00 |
| ATOM | 1415 | P    | RA | 45 | -2.795 | -31.380 | 1.483  | 0.00 | 0.00 |
| ATOM | 1416 | O1P  | RA | 45 | -3.479 | -32.579 | 1.901  | 0.00 | 0.00 |
| ATOM | 1417 | O2P  | RA | 45 | -1.393 | -31.242 | 1.794  | 0.00 | 0.00 |
| ATOM | 1418 | O5'  | RA | 45 | -2.932 | -31.252 | -0.066 | 0.00 | 0.00 |
| ATOM | 1419 | C5'  | RA | 45 | -4.132 | -31.535 | -0.715 | 0.00 | 0.00 |
| ATOM | 1420 | 1H5' | RA | 45 | -4.942 | -31.005 | -0.252 | 0.00 | 0.00 |
| ATOM | 1421 | 2H5' | RA | 45 | -4.325 | -32.577 | -0.642 | 0.00 | 0.00 |

|      |      |      |     |    |        |         |         |      |      |
|------|------|------|-----|----|--------|---------|---------|------|------|
| ATOM | 1422 | C4'  | RA  | 45 | -4.097 | -31.151 | -2.170  | 0.00 | 0.00 |
| ATOM | 1423 | H4'  | RA  | 45 | -5.056 | -31.355 | -2.581  | 0.00 | 0.00 |
| ATOM | 1424 | O4'  | RA  | 45 | -3.823 | -29.791 | -2.333  | 0.00 | 0.00 |
| ATOM | 1425 | C1'  | RA  | 45 | -3.064 | -29.621 | -3.506  | 0.00 | 0.00 |
| ATOM | 1426 | H1'  | RA  | 45 | -3.554 | -28.953 | -4.175  | 0.00 | 0.00 |
| ATOM | 1427 | N9   | RA  | 45 | -1.742 | -29.090 | -3.217  | 0.00 | 0.00 |
| ATOM | 1428 | C8   | RA  | 45 | -1.027 | -29.160 | -2.080  | 0.00 | 0.00 |
| ATOM | 1429 | H8   | RA  | 45 | -1.394 | -29.642 | -1.211  | 0.00 | 0.00 |
| ATOM | 1430 | N7   | RA  | 45 | 0.124  | -28.589 | -2.136  | 0.00 | 0.00 |
| ATOM | 1431 | C5   | RA  | 45 | 0.178  | -28.118 | -3.431  | 0.00 | 0.00 |
| ATOM | 1432 | C6   | RA  | 45 | 1.113  | -27.422 | -4.202  | 0.00 | 0.00 |
| ATOM | 1433 | N6   | RA  | 45 | 2.258  | -26.991 | -3.786  | 0.00 | 0.00 |
| ATOM | 1434 | H61  | RA  | 45 | 2.805  | -26.457 | -4.403  | 0.00 | 0.00 |
| ATOM | 1435 | H62  | RA  | 45 | 2.516  | -27.149 | -2.848  | 0.00 | 0.00 |
| ATOM | 1436 | N1   | RA  | 45 | 0.877  | -27.137 | -5.459  | 0.00 | 0.00 |
| ATOM | 1437 | C2   | RA  | 45 | -0.256 | -27.517 | -5.964  | 0.00 | 0.00 |
| ATOM | 1438 | H2   | RA  | 45 | -0.405 | -27.283 | -6.982  | 0.00 | 0.00 |
| ATOM | 1439 | N3   | RA  | 45 | -1.226 | -28.169 | -5.378  | 0.00 | 0.00 |
| ATOM | 1440 | C4   | RA  | 45 | -0.946 | -28.438 | -4.096  | 0.00 | 0.00 |
| ATOM | 1441 | C3'  | RA  | 45 | -3.077 | -31.892 | -2.990  | 0.00 | 0.00 |
| ATOM | 1442 | H3'  | RA  | 45 | -2.163 | -31.925 | -2.456  | 0.00 | 0.00 |
| ATOM | 1443 | C2'  | RA  | 45 | -2.950 | -30.969 | -4.171  | 0.00 | 0.00 |
| ATOM | 1444 | 1H2' | RA  | 45 | -2.003 | -31.087 | -4.659  | 0.00 | 0.00 |
| ATOM | 1445 | O2'  | RA  | 45 | -3.992 | -31.086 | -5.072  | 0.00 | 0.00 |
| ATOM | 1446 | 2HO' | RA  | 45 | -3.958 | -31.380 | -5.468  | 0.00 | 0.00 |
| ATOM | 1447 | O3'  | RA  | 45 | -3.489 | -33.163 | -3.356  | 0.00 | 0.00 |
| ATOM | 1448 | P    | RG3 | 46 | -2.457 | -34.257 | -3.727  | 0.00 | 0.00 |
| ATOM | 1449 | O1P  | RG3 | 46 | -3.195 | -35.457 | -3.999  | 0.00 | 0.00 |
| ATOM | 1450 | O2P  | RG3 | 46 | -1.455 | -34.280 | -2.717  | 0.00 | 0.00 |
| ATOM | 1451 | O5'  | RG3 | 46 | -1.765 | -33.793 | -5.050  | 0.00 | 0.00 |
| ATOM | 1452 | C5'  | RG3 | 46 | -2.410 | -33.853 | -6.273  | 0.00 | 0.00 |
| ATOM | 1453 | 1H5' | RG3 | 46 | -3.336 | -33.353 | -6.211  | 0.00 | 0.00 |
| ATOM | 1454 | 2H5' | RG3 | 46 | -2.603 | -34.856 | -6.522  | 0.00 | 0.00 |
| ATOM | 1455 | C4'  | RG3 | 46 | -1.606 | -33.223 | -7.380  | 0.00 | 0.00 |
| ATOM | 1456 | H4'  | RG3 | 46 | -2.178 | -33.282 | -8.265  | 0.00 | 0.00 |
| ATOM | 1457 | O4'  | RG3 | 46 | -1.331 | -31.889 | -7.122  | 0.00 | 0.00 |
| ATOM | 1458 | C1'  | RG3 | 46 | -0.082 | -31.573 | -7.677  | 0.00 | 0.00 |
| ATOM | 1459 | H1'  | RG3 | 46 | -0.190 | -30.805 | -8.388  | 0.00 | 0.00 |
| ATOM | 1460 | N9   | RG3 | 46 | 0.840  | -31.114 | -6.668  | 0.00 | 0.00 |
| ATOM | 1461 | C8   | RG3 | 46 | 0.878  | -31.388 | -5.353  | 0.00 | 0.00 |
| ATOM | 1462 | H8   | RG3 | 46 | 0.153  | -31.980 | -4.871  | 0.00 | 0.00 |
| ATOM | 1463 | N7   | RG3 | 46 | 1.877  | -30.873 | -4.737  | 0.00 | 0.00 |
| ATOM | 1464 | C5   | RG3 | 46 | 2.559  | -30.214 | -5.721  | 0.00 | 0.00 |
| ATOM | 1465 | C6   | RG3 | 46 | 3.769  | -29.478 | -5.696  | 0.00 | 0.00 |
| ATOM | 1466 | O6   | RG3 | 46 | 4.503  | -29.233 | -4.776  | 0.00 | 0.00 |
| ATOM | 1467 | N1   | RG3 | 46 | 4.136  | -29.001 | -6.908  | 0.00 | 0.00 |
| ATOM | 1468 | H1   | RG3 | 46 | 4.970  | -28.480 | -6.962  | 0.00 | 0.00 |
| ATOM | 1469 | C2   | RG3 | 46 | 3.455  | -29.222 | -8.023  | 0.00 | 0.00 |
| ATOM | 1470 | N2   | RG3 | 46 | 3.958  | -28.770 | -9.111  | 0.00 | 0.00 |
| ATOM | 1471 | H21  | RG3 | 46 | 4.838  | -28.331 | -9.111  | 0.00 | 0.00 |
| ATOM | 1472 | H22  | RG3 | 46 | 3.473  | -28.942 | -9.938  | 0.00 | 0.00 |
| ATOM | 1473 | N3   | RG3 | 46 | 2.330  | -29.884 | -8.094  | 0.00 | 0.00 |
| ATOM | 1474 | C4   | RG3 | 46 | 1.930  | -30.363 | -6.909  | 0.00 | 0.00 |
| ATOM | 1475 | C3'  | RG3 | 46 | -0.282 | -33.870 | -7.642  | 0.00 | 0.00 |
| ATOM | 1476 | H3'  | RG3 | 46 | 0.197  | -34.060 | -6.726  | 0.00 | 0.00 |
| ATOM | 1477 | C2'  | RG3 | 46 | 0.447  | -32.786 | -8.362  | 0.00 | 0.00 |
| ATOM | 1478 | 1H2' | RG3 | 46 | 1.499  | -32.862 | -8.246  | 0.00 | 0.00 |
| ATOM | 1479 | O2'  | RG3 | 46 | 0.111  | -32.727 | -9.698  | 0.00 | 0.00 |
| ATOM | 1480 | 2HO' | RG3 | 46 | 0.332  | -32.950 | -10.064 | 0.00 | 0.00 |
| ATOM | 1481 | O3'  | RG3 | 46 | -0.366 | -34.999 | -8.410  | 0.00 | 0.00 |
| ATOM | 1482 | H3T  | RG3 | 46 | -0.223 | -34.993 | -8.767  | 0.00 | 0.00 |

# closed-like bulged-in/out conformation - closed-like\_bulged-inout\_c.pdb

REMARK MD average structure 17800 - 17900 ps

REMARK 1XPF (PDB database)

REMARK sequence chain I. residues 1-23 5'(CUUGCUGAGGUGCACACAGCAAG)3'

REMARK sequence chain II. residues 24-46 5'(CUUGCUGAGGUGCACACAGCAAG)3'

REMARK PDB format: output from Ptraj module of AMBER-8.0

|      |    |      |     |   |         |        |        |      |      |
|------|----|------|-----|---|---------|--------|--------|------|------|
| ATOM | 1  | H5T  | RC5 | 1 | -10.017 | 31.941 | -7.674 | 0.00 | 0.00 |
| ATOM | 2  | O5'  | RC5 | 1 | -9.741  | 31.841 | -7.601 | 0.00 | 0.00 |
| ATOM | 3  | C5'  | RC5 | 1 | -8.603  | 31.265 | -7.306 | 0.00 | 0.00 |
| ATOM | 4  | 1H5' | RC5 | 1 | -8.107  | 31.061 | -8.141 | 0.00 | 0.00 |
| ATOM | 5  | 2H5' | RC5 | 1 | -8.814  | 30.413 | -6.840 | 0.00 | 0.00 |
| ATOM | 6  | C4'  | RC5 | 1 | -7.742  | 32.084 | -6.487 | 0.00 | 0.00 |
| ATOM | 7  | H4'  | RC5 | 1 | -7.612  | 32.987 | -6.927 | 0.00 | 0.00 |
| ATOM | 8  | O4'  | RC5 | 1 | -8.265  | 32.228 | -5.280 | 0.00 | 0.00 |
| ATOM | 9  | C1'  | RC5 | 1 | -7.250  | 32.501 | -4.404 | 0.00 | 0.00 |
| ATOM | 10 | H1'  | RC5 | 1 | -7.248  | 33.520 | -4.190 | 0.00 | 0.00 |
| ATOM | 11 | N1   | RC5 | 1 | -7.392  | 31.756 | -3.174 | 0.00 | 0.00 |
| ATOM | 12 | C6   | RC5 | 1 | -7.975  | 30.582 | -3.122 | 0.00 | 0.00 |
| ATOM | 13 | H6   | RC5 | 1 | -8.354  | 30.178 | -3.982 | 0.00 | 0.00 |
| ATOM | 14 | C5   | RC5 | 1 | -8.082  | 29.940 | -1.987 | 0.00 | 0.00 |
| ATOM | 15 | H5   | RC5 | 1 | -8.549  | 29.025 | -1.946 | 0.00 | 0.00 |
| ATOM | 16 | C4   | RC5 | 1 | -7.573  | 30.525 | -0.887 | 0.00 | 0.00 |
| ATOM | 17 | N4   | RC5 | 1 | -7.661  | 29.973 | 0.233  | 0.00 | 0.00 |
| ATOM | 18 | H41  | RC5 | 1 | -7.245  | 30.404 | 0.978  | 0.00 | 0.00 |
| ATOM | 19 | H42  | RC5 | 1 | -8.067  | 29.123 | 0.311  | 0.00 | 0.00 |
| ATOM | 20 | N3   | RC5 | 1 | -6.988  | 31.638 | -0.918 | 0.00 | 0.00 |
| ATOM | 21 | C2   | RC5 | 1 | -6.883  | 32.271 | -2.054 | 0.00 | 0.00 |
| ATOM | 22 | O2   | RC5 | 1 | -6.314  | 33.303 | -2.056 | 0.00 | 0.00 |
| ATOM | 23 | C3'  | RC5 | 1 | -6.420  | 31.525 | -6.269 | 0.00 | 0.00 |
| ATOM | 24 | H3'  | RC5 | 1 | -6.546  | 30.547 | -6.053 | 0.00 | 0.00 |
| ATOM | 25 | C2'  | RC5 | 1 | -5.983  | 32.213 | -5.096 | 0.00 | 0.00 |
| ATOM | 26 | 1H2' | RC5 | 1 | -5.379  | 31.618 | -4.540 | 0.00 | 0.00 |
| ATOM | 27 | O2'  | RC5 | 1 | -5.346  | 33.354 | -5.384 | 0.00 | 0.00 |
| ATOM | 28 | 2HO' | RC5 | 1 | -4.714  | 33.178 | -5.873 | 0.00 | 0.00 |
| ATOM | 29 | O3'  | RC5 | 1 | -5.597  | 31.719 | -7.297 | 0.00 | 0.00 |
| ATOM | 30 | P    | RU  | 2 | -4.303  | 30.985 | -7.416 | 0.00 | 0.00 |
| ATOM | 31 | O1P  | RU  | 2 | -4.571  | 29.665 | -7.127 | 0.00 | 0.00 |
| ATOM | 32 | O2P  | RU  | 2 | -3.742  | 31.309 | -8.619 | 0.00 | 0.00 |
| ATOM | 33 | O5'  | RU  | 2 | -3.391  | 31.574 | -6.344 | 0.00 | 0.00 |
| ATOM | 34 | C5'  | RU  | 2 | -2.525  | 31.394 | -6.051 | 0.00 | 0.00 |
| ATOM | 35 | 1H5' | RU  | 2 | -2.259  | 31.437 | -6.692 | 0.00 | 0.00 |
| ATOM | 36 | 2H5' | RU  | 2 | -2.585  | 30.740 | -6.006 | 0.00 | 0.00 |
| ATOM | 37 | C4'  | RU  | 2 | -1.845  | 32.054 | -4.915 | 0.00 | 0.00 |
| ATOM | 38 | H4'  | RU  | 2 | -1.383  | 32.935 | -5.262 | 0.00 | 0.00 |
| ATOM | 39 | O4'  | RU  | 2 | -2.719  | 32.369 | -3.885 | 0.00 | 0.00 |
| ATOM | 40 | C1'  | RU  | 2 | -2.067  | 32.224 | -2.662 | 0.00 | 0.00 |
| ATOM | 41 | H1'  | RU  | 2 | -2.044  | 33.163 | -2.175 | 0.00 | 0.00 |
| ATOM | 42 | N1   | RU  | 2 | -2.724  | 31.258 | -1.777 | 0.00 | 0.00 |
| ATOM | 43 | C6   | RU  | 2 | -3.587  | 30.327 | -2.223 | 0.00 | 0.00 |
| ATOM | 44 | H6   | RU  | 2 | -3.765  | 30.251 | -3.241 | 0.00 | 0.00 |
| ATOM | 45 | C5   | RU  | 2 | -4.217  | 29.508 | -1.389 | 0.00 | 0.00 |
| ATOM | 46 | H5   | RU  | 2 | -4.889  | 28.791 | -1.752 | 0.00 | 0.00 |
| ATOM | 47 | C4   | RU  | 2 | -4.015  | 29.574 | -0.008 | 0.00 | 0.00 |
| ATOM | 48 | O4   | RU  | 2 | -4.562  | 28.897 | 0.812  | 0.00 | 0.00 |
| ATOM | 49 | N3   | RU  | 2 | -3.119  | 30.497 | 0.364  | 0.00 | 0.00 |
| ATOM | 50 | H3   | RU  | 2 | -2.930  | 30.559 | 1.318  | 0.00 | 0.00 |
| ATOM | 51 | C2   | RU  | 2 | -2.441  | 31.329 | -0.448 | 0.00 | 0.00 |
| ATOM | 52 | O2   | RU  | 2 | -1.626  | 32.073 | 0.019  | 0.00 | 0.00 |
| ATOM | 53 | C3'  | RU  | 2 | -0.815  | 31.185 | -4.308 | 0.00 | 0.00 |
| ATOM | 54 | H3'  | RU  | 2 | -1.212  | 30.213 | -4.186 | 0.00 | 0.00 |
| ATOM | 55 | C2'  | RU  | 2 | -0.674  | 31.822 | -2.970 | 0.00 | 0.00 |
| ATOM | 56 | 1H2' | RU  | 2 | -0.309  | 31.131 | -2.266 | 0.00 | 0.00 |
| ATOM | 57 | O2'  | RU  | 2 | 0.105   | 32.955 | -3.008 | 0.00 | 0.00 |
| ATOM | 58 | 2HO' | RU  | 2 | 0.653   | 32.874 | -3.186 | 0.00 | 0.00 |
| ATOM | 59 | O3'  | RU  | 2 | 0.352   | 31.166 | -5.038 | 0.00 | 0.00 |
| ATOM | 60 | P    | RU  | 3 | 1.287   | 29.954 | -4.986 | 0.00 | 0.00 |
| ATOM | 61 | O1P  | RU  | 3 | 0.503   | 28.771 | -5.160 | 0.00 | 0.00 |

|      |     |      |    |   |        |        |        |      |      |
|------|-----|------|----|---|--------|--------|--------|------|------|
| ATOM | 62  | O2P  | RU | 3 | 2.358  | 30.219 | -5.885 | 0.00 | 0.00 |
| ATOM | 63  | O5'  | RU | 3 | 1.843  | 29.927 | -3.550 | 0.00 | 0.00 |
| ATOM | 64  | C5'  | RU | 3 | 2.816  | 30.810 | -3.135 | 0.00 | 0.00 |
| ATOM | 65  | 1H5' | RU | 3 | 2.514  | 31.796 | -3.340 | 0.00 | 0.00 |
| ATOM | 66  | 2H5' | RU | 3 | 3.703  | 30.623 | -3.655 | 0.00 | 0.00 |
| ATOM | 67  | C4'  | RU | 3 | 3.091  | 30.688 | -1.675 | 0.00 | 0.00 |
| ATOM | 68  | H4'  | RU | 3 | 3.843  | 31.394 | -1.418 | 0.00 | 0.00 |
| ATOM | 69  | O4'  | RU | 3 | 1.964  | 30.937 | -0.913 | 0.00 | 0.00 |
| ATOM | 70  | C1'  | RU | 3 | 2.053  | 30.210 | 0.274  | 0.00 | 0.00 |
| ATOM | 71  | H1'  | RU | 3 | 2.148  | 30.885 | 1.081  | 0.00 | 0.00 |
| ATOM | 72  | N1   | RU | 3 | 0.890  | 29.356 | 0.494  | 0.00 | 0.00 |
| ATOM | 73  | C6   | RU | 3 | 0.218  | 28.777 | -0.510 | 0.00 | 0.00 |
| ATOM | 74  | H6   | RU | 3 | 0.507  | 28.981 | -1.489 | 0.00 | 0.00 |
| ATOM | 75  | C5   | RU | 3 | -0.800 | 27.954 | -0.275 | 0.00 | 0.00 |
| ATOM | 76  | H5   | RU | 3 | -1.313 | 27.509 | -1.067 | 0.00 | 0.00 |
| ATOM | 77  | C4   | RU | 3 | -1.215 | 27.644 | 1.024  | 0.00 | 0.00 |
| ATOM | 78  | O4   | RU | 3 | -2.123 | 26.917 | 1.319  | 0.00 | 0.00 |
| ATOM | 79  | N3   | RU | 3 | -0.492 | 28.243 | 1.970  | 0.00 | 0.00 |
| ATOM | 80  | H3   | RU | 3 | -0.734 | 28.034 | 2.888  | 0.00 | 0.00 |
| ATOM | 81  | C2   | RU | 3 | 0.549  | 29.076 | 1.775  | 0.00 | 0.00 |
| ATOM | 82  | O2   | RU | 3 | 1.134  | 29.516 | 2.714  | 0.00 | 0.00 |
| ATOM | 83  | C3'  | RU | 3 | 3.571  | 29.338 | -1.264 | 0.00 | 0.00 |
| ATOM | 84  | H3'  | RU | 3 | 2.954  | 28.602 | -1.718 | 0.00 | 0.00 |
| ATOM | 85  | C2'  | RU | 3 | 3.293  | 29.388 | 0.205  | 0.00 | 0.00 |
| ATOM | 86  | 1H2' | RU | 3 | 3.137  | 28.410 | 0.585  | 0.00 | 0.00 |
| ATOM | 87  | O2'  | RU | 3 | 4.297  | 30.032 | 0.911  | 0.00 | 0.00 |
| ATOM | 88  | 2HO' | RU | 3 | 5.008  | 29.579 | 0.825  | 0.00 | 0.00 |
| ATOM | 89  | O3'  | RU | 3 | 4.903  | 29.128 | -1.570 | 0.00 | 0.00 |
| ATOM | 90  | P    | RG | 4 | 5.542  | 27.722 | -1.491 | 0.00 | 0.00 |
| ATOM | 91  | O1P  | RG | 4 | 4.696  | 26.807 | -2.145 | 0.00 | 0.00 |
| ATOM | 92  | O2P  | RG | 4 | 6.879  | 27.830 | -1.899 | 0.00 | 0.00 |
| ATOM | 93  | O5'  | RG | 4 | 5.559  | 27.435 | -0.004 | 0.00 | 0.00 |
| ATOM | 94  | C5'  | RG | 4 | 5.307  | 26.230 | 0.496  | 0.00 | 0.00 |
| ATOM | 95  | 1H5' | RG | 4 | 6.076  | 25.593 | 0.249  | 0.00 | 0.00 |
| ATOM | 96  | 2H5' | RG | 4 | 4.447  | 25.860 | 0.100  | 0.00 | 0.00 |
| ATOM | 97  | C4'  | RG | 4 | 5.170  | 26.323 | 1.957  | 0.00 | 0.00 |
| ATOM | 98  | H4'  | RG | 4 | 5.950  | 26.916 | 2.334  | 0.00 | 0.00 |
| ATOM | 99  | O4'  | RG | 4 | 3.957  | 26.878 | 2.311  | 0.00 | 0.00 |
| ATOM | 100 | C1'  | RG | 4 | 3.475  | 26.254 | 3.465  | 0.00 | 0.00 |
| ATOM | 101 | H1'  | RG | 4 | 3.303  | 26.971 | 4.231  | 0.00 | 0.00 |
| ATOM | 102 | N9   | RG | 4 | 2.216  | 25.553 | 3.195  | 0.00 | 0.00 |
| ATOM | 103 | C8   | RG | 4 | 1.571  | 25.379 | 2.020  | 0.00 | 0.00 |
| ATOM | 104 | H8   | RG | 4 | 1.947  | 25.765 | 1.113  | 0.00 | 0.00 |
| ATOM | 105 | N7   | RG | 4 | 0.472  | 24.711 | 2.099  | 0.00 | 0.00 |
| ATOM | 106 | C5   | RG | 4 | 0.367  | 24.422 | 3.439  | 0.00 | 0.00 |
| ATOM | 107 | C6   | RG | 4 | -0.621 | 23.717 | 4.170  | 0.00 | 0.00 |
| ATOM | 108 | O6   | RG | 4 | -1.646 | 23.197 | 3.781  | 0.00 | 0.00 |
| ATOM | 109 | N1   | RG | 4 | -0.341 | 23.629 | 5.494  | 0.00 | 0.00 |
| ATOM | 110 | H1   | RG | 4 | -0.975 | 23.125 | 6.055  | 0.00 | 0.00 |
| ATOM | 111 | C2   | RG | 4 | 0.745  | 24.166 | 6.064  | 0.00 | 0.00 |
| ATOM | 112 | N2   | RG | 4 | 0.901  | 23.974 | 7.317  | 0.00 | 0.00 |
| ATOM | 113 | H21  | RG | 4 | 0.246  | 23.432 | 7.818  | 0.00 | 0.00 |
| ATOM | 114 | H22  | RG | 4 | 1.704  | 24.354 | 7.750  | 0.00 | 0.00 |
| ATOM | 115 | N3   | RG | 4 | 1.677  | 24.838 | 5.434  | 0.00 | 0.00 |
| ATOM | 116 | C4   | RG | 4 | 1.435  | 24.935 | 4.114  | 0.00 | 0.00 |
| ATOM | 117 | C3'  | RG | 4 | 5.235  | 24.987 | 2.632  | 0.00 | 0.00 |
| ATOM | 118 | H3'  | RG | 4 | 4.637  | 24.303 | 2.083  | 0.00 | 0.00 |
| ATOM | 119 | C2'  | RG | 4 | 4.557  | 25.304 | 3.919  | 0.00 | 0.00 |
| ATOM | 120 | 1H2' | RG | 4 | 4.159  | 24.428 | 4.363  | 0.00 | 0.00 |
| ATOM | 121 | O2'  | RG | 4 | 5.386  | 25.971 | 4.806  | 0.00 | 0.00 |
| ATOM | 122 | 2HO' | RG | 4 | 5.838  | 25.817 | 4.943  | 0.00 | 0.00 |
| ATOM | 123 | O3'  | RG | 4 | 6.537  | 24.529 | 2.788  | 0.00 | 0.00 |
| ATOM | 124 | P    | RC | 5 | 6.853  | 23.013 | 2.862  | 0.00 | 0.00 |
| ATOM | 125 | O1P  | RC | 5 | 6.174  | 22.368 | 1.772  | 0.00 | 0.00 |
| ATOM | 126 | O2P  | RC | 5 | 8.281  | 22.871 | 2.984  | 0.00 | 0.00 |
| ATOM | 127 | O5'  | RC | 5 | 6.213  | 22.509 | 4.179  | 0.00 | 0.00 |
| ATOM | 128 | C5'  | RC | 5 | 6.741  | 22.830 | 5.417  | 0.00 | 0.00 |
| ATOM | 129 | 1H5' | RC | 5 | 6.788  | 23.883 | 5.522  | 0.00 | 0.00 |

|      |     |      |    |   |        |        |       |      |      |
|------|-----|------|----|---|--------|--------|-------|------|------|
| ATOM | 130 | 2H5' | RC | 5 | 7.724  | 22.442 | 5.509 | 0.00 | 0.00 |
| ATOM | 131 | C4'  | RC | 5 | 5.916  | 22.276 | 6.529 | 0.00 | 0.00 |
| ATOM | 132 | H4'  | RC | 5 | 6.372  | 22.567 | 7.447 | 0.00 | 0.00 |
| ATOM | 133 | O4'  | RC | 5 | 4.597  | 22.747 | 6.503 | 0.00 | 0.00 |
| ATOM | 134 | C1'  | RC | 5 | 3.743  | 21.755 | 7.015 | 0.00 | 0.00 |
| ATOM | 135 | H1'  | RC | 5 | 3.253  | 22.123 | 7.885 | 0.00 | 0.00 |
| ATOM | 136 | N1   | RC | 5 | 2.711  | 21.329 | 6.041 | 0.00 | 0.00 |
| ATOM | 137 | C6   | RC | 5 | 2.813  | 21.568 | 4.718 | 0.00 | 0.00 |
| ATOM | 138 | H6   | RC | 5 | 3.666  | 22.070 | 4.348 | 0.00 | 0.00 |
| ATOM | 139 | C5   | RC | 5 | 1.834  | 21.185 | 3.882 | 0.00 | 0.00 |
| ATOM | 140 | H5   | RC | 5 | 1.915  | 21.379 | 2.850 | 0.00 | 0.00 |
| ATOM | 141 | C4   | RC | 5 | 0.733  | 20.528 | 4.427 | 0.00 | 0.00 |
| ATOM | 142 | N4   | RC | 5 | -0.239 | 20.151 | 3.685 | 0.00 | 0.00 |
| ATOM | 143 | H41  | RC | 5 | -0.996 | 19.704 | 4.122 | 0.00 | 0.00 |
| ATOM | 144 | H42  | RC | 5 | -0.219 | 20.331 | 2.730 | 0.00 | 0.00 |
| ATOM | 145 | N3   | RC | 5 | 0.626  | 20.264 | 5.686 | 0.00 | 0.00 |
| ATOM | 146 | C2   | RC | 5 | 1.605  | 20.653 | 6.509 | 0.00 | 0.00 |
| ATOM | 147 | O2   | RC | 5 | 1.497  | 20.376 | 7.676 | 0.00 | 0.00 |
| ATOM | 148 | C3'  | RC | 5 | 5.817  | 20.783 | 6.523 | 0.00 | 0.00 |
| ATOM | 149 | H3'  | RC | 5 | 5.567  | 20.462 | 5.543 | 0.00 | 0.00 |
| ATOM | 150 | C2'  | RC | 5 | 4.624  | 20.598 | 7.411 | 0.00 | 0.00 |
| ATOM | 151 | 1H2' | RC | 5 | 4.154  | 19.666 | 7.220 | 0.00 | 0.00 |
| ATOM | 152 | O2'  | RC | 5 | 4.939  | 20.736 | 8.752 | 0.00 | 0.00 |
| ATOM | 153 | 2HO' | RC | 5 | 5.331  | 20.456 | 8.975 | 0.00 | 0.00 |
| ATOM | 154 | O3'  | RC | 5 | 6.966  | 20.152 | 7.003 | 0.00 | 0.00 |
| ATOM | 155 | P    | RU | 6 | 7.306  | 18.699 | 6.588 | 0.00 | 0.00 |
| ATOM | 156 | O1P  | RU | 6 | 7.237  | 18.631 | 5.157 | 0.00 | 0.00 |
| ATOM | 157 | O2P  | RU | 6 | 8.541  | 18.346 | 7.248 | 0.00 | 0.00 |
| ATOM | 158 | O5'  | RU | 6 | 6.160  | 17.811 | 7.163 | 0.00 | 0.00 |
| ATOM | 159 | C5'  | RU | 6 | 6.089  | 17.508 | 8.514 | 0.00 | 0.00 |
| ATOM | 160 | 1H5' | RU | 6 | 6.072  | 18.405 | 9.082 | 0.00 | 0.00 |
| ATOM | 161 | 2H5' | RU | 6 | 6.951  | 16.952 | 8.800 | 0.00 | 0.00 |
| ATOM | 162 | C4'  | RU | 6 | 4.867  | 16.697 | 8.857 | 0.00 | 0.00 |
| ATOM | 163 | H4'  | RU | 6 | 4.883  | 16.521 | 9.903 | 0.00 | 0.00 |
| ATOM | 164 | O4'  | RU | 6 | 3.670  | 17.346 | 8.524 | 0.00 | 0.00 |
| ATOM | 165 | C1'  | RU | 6 | 2.680  | 16.375 | 8.272 | 0.00 | 0.00 |
| ATOM | 166 | H1'  | RU | 6 | 1.926  | 16.428 | 9.029 | 0.00 | 0.00 |
| ATOM | 167 | N1   | RU | 6 | 2.026  | 16.534 | 6.962 | 0.00 | 0.00 |
| ATOM | 168 | C6   | RU | 6 | 2.637  | 17.148 | 5.920 | 0.00 | 0.00 |
| ATOM | 169 | H6   | RU | 6 | 3.607  | 17.551 | 6.056 | 0.00 | 0.00 |
| ATOM | 170 | C5   | RU | 6 | 2.020  | 17.248 | 4.727 | 0.00 | 0.00 |
| ATOM | 171 | H5   | RU | 6 | 2.498  | 17.731 | 3.920 | 0.00 | 0.00 |
| ATOM | 172 | C4   | RU | 6 | 0.720  | 16.711 | 4.503 | 0.00 | 0.00 |
| ATOM | 173 | O4   | RU | 6 | 0.097  | 16.753 | 3.467 | 0.00 | 0.00 |
| ATOM | 174 | N3   | RU | 6 | 0.191  | 16.097 | 5.575 | 0.00 | 0.00 |
| ATOM | 175 | H3   | RU | 6 | -0.698 | 15.684 | 5.453 | 0.00 | 0.00 |
| ATOM | 176 | C2   | RU | 6 | 0.777  | 15.971 | 6.795 | 0.00 | 0.00 |
| ATOM | 177 | O2   | RU | 6 | 0.196  | 15.368 | 7.663 | 0.00 | 0.00 |
| ATOM | 178 | C3'  | RU | 6 | 4.807  | 15.369 | 8.173 | 0.00 | 0.00 |
| ATOM | 179 | H3'  | RU | 6 | 4.995  | 15.514 | 7.139 | 0.00 | 0.00 |
| ATOM | 180 | C2'  | RU | 6 | 3.356  | 15.024 | 8.366 | 0.00 | 0.00 |
| ATOM | 181 | 1H2' | RU | 6 | 3.021  | 14.363 | 7.609 | 0.00 | 0.00 |
| ATOM | 182 | O2'  | RU | 6 | 3.110  | 14.489 | 9.619 | 0.00 | 0.00 |
| ATOM | 183 | 2HO' | RU | 6 | 3.543  | 13.886 | 9.737 | 0.00 | 0.00 |
| ATOM | 184 | O3'  | RU | 6 | 5.683  | 14.431 | 8.717 | 0.00 | 0.00 |
| ATOM | 185 | P    | RG | 7 | 6.077  | 13.155 | 7.933 | 0.00 | 0.00 |
| ATOM | 186 | O1P  | RG | 7 | 6.325  | 13.523 | 6.576 | 0.00 | 0.00 |
| ATOM | 187 | O2P  | RG | 7 | 7.120  | 12.497 | 8.678 | 0.00 | 0.00 |
| ATOM | 188 | O5'  | RG | 7 | 4.804  | 12.261 | 7.945 | 0.00 | 0.00 |
| ATOM | 189 | C5'  | RG | 7 | 4.450  | 11.514 | 9.052 | 0.00 | 0.00 |
| ATOM | 190 | 1H5' | RG | 7 | 4.302  | 12.155 | 9.882 | 0.00 | 0.00 |
| ATOM | 191 | 2H5' | RG | 7 | 5.234  | 10.837 | 9.284 | 0.00 | 0.00 |
| ATOM | 192 | C4'  | RG | 7 | 3.197  | 10.714 | 8.814 | 0.00 | 0.00 |
| ATOM | 193 | H4'  | RG | 7 | 3.003  | 10.146 | 9.690 | 0.00 | 0.00 |
| ATOM | 194 | O4'  | RG | 7 | 2.078  | 11.514 | 8.547 | 0.00 | 0.00 |
| ATOM | 195 | C1'  | RG | 7 | 1.213  | 10.828 | 7.672 | 0.00 | 0.00 |
| ATOM | 196 | H1'  | RG | 7 | 0.257  | 10.674 | 8.129 | 0.00 | 0.00 |
| ATOM | 197 | N9   | RG | 7 | 1.018  | 11.591 | 6.439 | 0.00 | 0.00 |

|      |     |      |    |   |        |        |       |      |      |
|------|-----|------|----|---|--------|--------|-------|------|------|
| ATOM | 198 | C8   | RG | 7 | 1.905  | 12.362 | 5.769 | 0.00 | 0.00 |
| ATOM | 199 | H8   | RG | 7 | 2.883  | 12.551 | 6.142 | 0.00 | 0.00 |
| ATOM | 200 | N7   | RG | 7 | 1.470  | 12.829 | 4.648 | 0.00 | 0.00 |
| ATOM | 201 | C5   | RG | 7 | 0.192  | 12.313 | 4.555 | 0.00 | 0.00 |
| ATOM | 202 | C6   | RG | 7 | -0.796 | 12.408 | 3.532 | 0.00 | 0.00 |
| ATOM | 203 | O6   | RG | 7 | -0.744 | 12.979 | 2.464 | 0.00 | 0.00 |
| ATOM | 204 | N1   | RG | 7 | -1.941 | 11.728 | 3.810 | 0.00 | 0.00 |
| ATOM | 205 | H1   | RG | 7 | -2.664 | 11.743 | 3.131 | 0.00 | 0.00 |
| ATOM | 206 | C2   | RG | 7 | -2.133 | 11.045 | 4.938 | 0.00 | 0.00 |
| ATOM | 207 | N2   | RG | 7 | -3.272 | 10.469 | 5.067 | 0.00 | 0.00 |
| ATOM | 208 | H21  | RG | 7 | -3.934 | 10.507 | 4.336 | 0.00 | 0.00 |
| ATOM | 209 | H22  | RG | 7 | -3.439 | 9.975  | 5.894 | 0.00 | 0.00 |
| ATOM | 210 | N3   | RG | 7 | -1.252 | 10.920 | 5.911 | 0.00 | 0.00 |
| ATOM | 211 | C4   | RG | 7 | -0.098 | 11.574 | 5.659 | 0.00 | 0.00 |
| ATOM | 212 | C3'  | RG | 7 | 3.311  | 9.748  | 7.674 | 0.00 | 0.00 |
| ATOM | 213 | H3'  | RG | 7 | 3.753  | 10.239 | 6.837 | 0.00 | 0.00 |
| ATOM | 214 | C2'  | RG | 7 | 1.850  | 9.486  | 7.381 | 0.00 | 0.00 |
| ATOM | 215 | 1H2' | RG | 7 | 1.706  | 9.199  | 6.363 | 0.00 | 0.00 |
| ATOM | 216 | O2'  | RG | 7 | 1.307  | 8.524  | 8.236 | 0.00 | 0.00 |
| ATOM | 217 | 2HO' | RG | 7 | 1.744  | 7.787  | 8.135 | 0.00 | 0.00 |
| ATOM | 218 | O3'  | RG | 7 | 4.052  | 8.625  | 8.027 | 0.00 | 0.00 |
| ATOM | 219 | P    | RA | 8 | 4.509  | 7.568  | 7.086 | 0.00 | 0.00 |
| ATOM | 220 | O1P  | RA | 8 | 4.423  | 8.074  | 5.764 | 0.00 | 0.00 |
| ATOM | 221 | O2P  | RA | 8 | 5.707  | 7.083  | 7.562 | 0.00 | 0.00 |
| ATOM | 222 | O5'  | RA | 8 | 3.480  | 6.465  | 7.280 | 0.00 | 0.00 |
| ATOM | 223 | C5'  | RA | 8 | 3.472  | 5.635  | 8.380 | 0.00 | 0.00 |
| ATOM | 224 | 1H5' | RA | 8 | 3.363  | 6.210  | 9.261 | 0.00 | 0.00 |
| ATOM | 225 | 2H5' | RA | 8 | 4.385  | 5.120  | 8.429 | 0.00 | 0.00 |
| ATOM | 226 | C4'  | RA | 8 | 2.379  | 4.619  | 8.307 | 0.00 | 0.00 |
| ATOM | 227 | H4'  | RA | 8 | 2.449  | 3.987  | 9.148 | 0.00 | 0.00 |
| ATOM | 228 | O4'  | RA | 8 | 1.133  | 5.212  | 8.324 | 0.00 | 0.00 |
| ATOM | 229 | C1'  | RA | 8 | 0.269  | 4.461  | 7.537 | 0.00 | 0.00 |
| ATOM | 230 | H1'  | RA | 8 | -0.540 | 4.119  | 8.114 | 0.00 | 0.00 |
| ATOM | 231 | N9   | RA | 8 | -0.243 | 5.302  | 6.495 | 0.00 | 0.00 |
| ATOM | 232 | C8   | RA | 8 | 0.343  | 5.872  | 5.532 | 0.00 | 0.00 |
| ATOM | 233 | H8   | RA | 8 | 1.321  | 5.784  | 5.441 | 0.00 | 0.00 |
| ATOM | 234 | N7   | RA | 8 | -0.385 | 6.539  | 4.743 | 0.00 | 0.00 |
| ATOM | 235 | C5   | RA | 8 | -1.551 | 6.402  | 5.226 | 0.00 | 0.00 |
| ATOM | 236 | C6   | RA | 8 | -2.762 | 6.842  | 4.865 | 0.00 | 0.00 |
| ATOM | 237 | N6   | RA | 8 | -3.068 | 7.559  | 3.872 | 0.00 | 0.00 |
| ATOM | 238 | H61  | RA | 8 | -3.947 | 7.816  | 3.711 | 0.00 | 0.00 |
| ATOM | 239 | H62  | RA | 8 | -2.413 | 7.845  | 3.319 | 0.00 | 0.00 |
| ATOM | 240 | N1   | RA | 8 | -3.714 | 6.544  | 5.538 | 0.00 | 0.00 |
| ATOM | 241 | C2   | RA | 8 | -3.497 | 5.817  | 6.557 | 0.00 | 0.00 |
| ATOM | 242 | H2   | RA | 8 | -4.286 | 5.596  | 7.082 | 0.00 | 0.00 |
| ATOM | 243 | N3   | RA | 8 | -2.424 | 5.325  | 7.015 | 0.00 | 0.00 |
| ATOM | 244 | C4   | RA | 8 | -1.474 | 5.658  | 6.297 | 0.00 | 0.00 |
| ATOM | 245 | C3'  | RA | 8 | 2.437  | 3.749  | 7.087 | 0.00 | 0.00 |
| ATOM | 246 | H3'  | RA | 8 | 2.642  | 4.357  | 6.245 | 0.00 | 0.00 |
| ATOM | 247 | C2'  | RA | 8 | 1.024  | 3.264  | 7.023 | 0.00 | 0.00 |
| ATOM | 248 | 1H2' | RA | 8 | 0.743  | 3.005  | 6.036 | 0.00 | 0.00 |
| ATOM | 249 | O2'  | RA | 8 | 0.791  | 2.194  | 7.871 | 0.00 | 0.00 |
| ATOM | 250 | 2HO' | RA | 8 | 1.292  | 1.485  | 7.603 | 0.00 | 0.00 |
| ATOM | 251 | O3'  | RA | 8 | 3.385  | 2.743  | 7.190 | 0.00 | 0.00 |
| ATOM | 252 | P    | RG | 9 | 3.719  | 1.769  | 6.041 | 0.00 | 0.00 |
| ATOM | 253 | O1P  | RG | 9 | 3.261  | 2.343  | 4.814 | 0.00 | 0.00 |
| ATOM | 254 | O2P  | RG | 9 | 5.088  | 1.401  | 6.169 | 0.00 | 0.00 |
| ATOM | 255 | O5'  | RG | 9 | 2.856  | 0.512  | 6.343 | 0.00 | 0.00 |
| ATOM | 256 | C5'  | RG | 9 | 3.231  | -0.408 | 7.311 | 0.00 | 0.00 |
| ATOM | 257 | 1H5' | RG | 9 | 3.360  | 0.090  | 8.232 | 0.00 | 0.00 |
| ATOM | 258 | 2H5' | RG | 9 | 4.146  | -0.857 | 7.041 | 0.00 | 0.00 |
| ATOM | 259 | C4'  | RG | 9 | 2.209  | -1.490 | 7.480 | 0.00 | 0.00 |
| ATOM | 260 | H4'  | RG | 9 | 2.544  | -2.141 | 8.254 | 0.00 | 0.00 |
| ATOM | 261 | O4'  | RG | 9 | 0.989  | -0.940 | 7.883 | 0.00 | 0.00 |
| ATOM | 262 | C1'  | RG | 9 | -0.045 | -1.445 | 7.096 | 0.00 | 0.00 |
| ATOM | 263 | H1'  | RG | 9 | -0.841 | -1.769 | 7.726 | 0.00 | 0.00 |
| ATOM | 264 | N9   | RG | 9 | -0.587 | -0.390 | 6.235 | 0.00 | 0.00 |
| ATOM | 265 | C8   | RG | 9 | -0.142 | 0.083  | 5.052 | 0.00 | 0.00 |

|      |     |      |    |    |        |        |        |      |      |
|------|-----|------|----|----|--------|--------|--------|------|------|
| ATOM | 266 | H8   | RG | 9  | 0.741  | -0.262 | 4.596  | 0.00 | 0.00 |
| ATOM | 267 | N7   | RG | 9  | -0.873 | 1.009  | 4.529  | 0.00 | 0.00 |
| ATOM | 268 | C5   | RG | 9  | -1.893 | 1.158  | 5.428  | 0.00 | 0.00 |
| ATOM | 269 | C6   | RG | 9  | -3.013 | 2.024  | 5.430  | 0.00 | 0.00 |
| ATOM | 270 | O6   | RG | 9  | -3.332 | 2.869  | 4.622  | 0.00 | 0.00 |
| ATOM | 271 | N1   | RG | 9  | -3.809 | 1.855  | 6.505  | 0.00 | 0.00 |
| ATOM | 272 | H1   | RG | 9  | -4.622 | 2.401  | 6.553  | 0.00 | 0.00 |
| ATOM | 273 | C2   | RG | 9  | -3.561 | 0.976  | 7.478  | 0.00 | 0.00 |
| ATOM | 274 | N2   | RG | 9  | -4.380 | 0.964  | 8.454  | 0.00 | 0.00 |
| ATOM | 275 | H21  | RG | 9  | -5.143 | 1.581  | 8.462  | 0.00 | 0.00 |
| ATOM | 276 | H22  | RG | 9  | -4.210 | 0.329  | 9.180  | 0.00 | 0.00 |
| ATOM | 277 | N3   | RG | 9  | -2.536 | 0.162  | 7.530  | 0.00 | 0.00 |
| ATOM | 278 | C4   | RG | 9  | -1.731 | 0.298  | 6.468  | 0.00 | 0.00 |
| ATOM | 279 | C3'  | RG | 9  | 1.979  | -2.321 | 6.246  | 0.00 | 0.00 |
| ATOM | 280 | H3'  | RG | 9  | 2.139  | -1.715 | 5.384  | 0.00 | 0.00 |
| ATOM | 281 | C2'  | RG | 9  | 0.507  | -2.644 | 6.365  | 0.00 | 0.00 |
| ATOM | 282 | 1H2' | RG | 9  | 0.053  | -2.753 | 5.409  | 0.00 | 0.00 |
| ATOM | 283 | O2'  | RG | 9  | 0.281  | -3.780 | 7.144  | 0.00 | 0.00 |
| ATOM | 284 | 2HO' | RG | 9  | 0.719  | -4.453 | 6.814  | 0.00 | 0.00 |
| ATOM | 285 | O3'  | RG | 9  | 2.809  | -3.449 | 6.210  | 0.00 | 0.00 |
| ATOM | 286 | P    | RG | 10 | 2.832  | -4.444 | 5.021  | 0.00 | 0.00 |
| ATOM | 287 | O1P  | RG | 10 | 2.398  | -5.673 | 5.525  | 0.00 | 0.00 |
| ATOM | 288 | O2P  | RG | 10 | 2.151  | -3.887 | 3.897  | 0.00 | 0.00 |
| ATOM | 289 | O5'  | RG | 10 | 4.300  | -4.569 | 4.623  | 0.00 | 0.00 |
| ATOM | 290 | C5'  | RG | 10 | 5.255  | -5.020 | 5.509  | 0.00 | 0.00 |
| ATOM | 291 | 1H5' | RG | 10 | 4.883  | -5.832 | 6.053  | 0.00 | 0.00 |
| ATOM | 292 | 2H5' | RG | 10 | 5.470  | -4.238 | 6.182  | 0.00 | 0.00 |
| ATOM | 293 | C4'  | RG | 10 | 6.529  | -5.456 | 4.825  | 0.00 | 0.00 |
| ATOM | 294 | H4'  | RG | 10 | 7.250  | -5.652 | 5.585  | 0.00 | 0.00 |
| ATOM | 295 | O4'  | RG | 10 | 6.345  | -6.642 | 4.101  | 0.00 | 0.00 |
| ATOM | 296 | C1'  | RG | 10 | 6.994  | -6.553 | 2.856  | 0.00 | 0.00 |
| ATOM | 297 | H1'  | RG | 10 | 7.603  | -7.418 | 2.679  | 0.00 | 0.00 |
| ATOM | 298 | N9   | RG | 10 | 6.000  | -6.484 | 1.780  | 0.00 | 0.00 |
| ATOM | 299 | C8   | RG | 10 | 4.644  | -6.485 | 1.880  | 0.00 | 0.00 |
| ATOM | 300 | H8   | RG | 10 | 4.144  | -6.443 | 2.818  | 0.00 | 0.00 |
| ATOM | 301 | N7   | RG | 10 | 4.021  | -6.588 | 0.753  | 0.00 | 0.00 |
| ATOM | 302 | C5   | RG | 10 | 5.047  | -6.653 | -0.176 | 0.00 | 0.00 |
| ATOM | 303 | C6   | RG | 10 | 5.026  | -6.804 | -1.592 | 0.00 | 0.00 |
| ATOM | 304 | O6   | RG | 10 | 4.074  | -6.939 | -2.336 | 0.00 | 0.00 |
| ATOM | 305 | N1   | RG | 10 | 6.265  | -6.801 | -2.164 | 0.00 | 0.00 |
| ATOM | 306 | H1   | RG | 10 | 6.313  | -6.903 | -3.149 | 0.00 | 0.00 |
| ATOM | 307 | C2   | RG | 10 | 7.404  | -6.693 | -1.468 | 0.00 | 0.00 |
| ATOM | 308 | N2   | RG | 10 | 8.498  | -6.667 | -2.151 | 0.00 | 0.00 |
| ATOM | 309 | H21  | RG | 10 | 8.462  | -6.703 | -3.139 | 0.00 | 0.00 |
| ATOM | 310 | H22  | RG | 10 | 9.353  | -6.591 | -1.662 | 0.00 | 0.00 |
| ATOM | 311 | N3   | RG | 10 | 7.480  | -6.584 | -0.156 | 0.00 | 0.00 |
| ATOM | 312 | C4   | RG | 10 | 6.261  | -6.568 | 0.444  | 0.00 | 0.00 |
| ATOM | 313 | C3'  | RG | 10 | 7.128  | -4.437 | 3.894  | 0.00 | 0.00 |
| ATOM | 314 | H3'  | RG | 10 | 6.353  | -3.920 | 3.377  | 0.00 | 0.00 |
| ATOM | 315 | C2'  | RG | 10 | 7.875  | -5.330 | 2.925  | 0.00 | 0.00 |
| ATOM | 316 | 1H2' | RG | 10 | 7.984  | -4.866 | 1.970  | 0.00 | 0.00 |
| ATOM | 317 | O2'  | RG | 10 | 9.123  | -5.720 | 3.417  | 0.00 | 0.00 |
| ATOM | 318 | 2HO' | RG | 10 | 9.435  | -5.274 | 3.739  | 0.00 | 0.00 |
| ATOM | 319 | O3'  | RG | 10 | 7.993  | -3.559 | 4.548  | 0.00 | 0.00 |
| ATOM | 320 | P    | RU | 11 | 8.178  | -2.101 | 4.070  | 0.00 | 0.00 |
| ATOM | 321 | O1P  | RU | 11 | 6.875  | -1.508 | 3.978  | 0.00 | 0.00 |
| ATOM | 322 | O2P  | RU | 11 | 9.159  | -1.485 | 4.919  | 0.00 | 0.00 |
| ATOM | 323 | O5'  | RU | 11 | 8.770  | -2.193 | 2.637  | 0.00 | 0.00 |
| ATOM | 324 | C5'  | RU | 11 | 10.116 | -2.449 | 2.397  | 0.00 | 0.00 |
| ATOM | 325 | 1H5' | RU | 11 | 10.392 | -3.377 | 2.835  | 0.00 | 0.00 |
| ATOM | 326 | 2H5' | RU | 11 | 10.707 | -1.679 | 2.831  | 0.00 | 0.00 |
| ATOM | 327 | C4'  | RU | 11 | 10.419 | -2.501 | 0.924  | 0.00 | 0.00 |
| ATOM | 328 | H4'  | RU | 11 | 11.470 | -2.646 | 0.801  | 0.00 | 0.00 |
| ATOM | 329 | O4'  | RU | 11 | 9.754  | -3.562 | 0.292  | 0.00 | 0.00 |
| ATOM | 330 | C1'  | RU | 11 | 9.442  | -3.180 | -1.027 | 0.00 | 0.00 |
| ATOM | 331 | H1'  | RU | 11 | 9.922  | -3.852 | -1.711 | 0.00 | 0.00 |
| ATOM | 332 | N1   | RU | 11 | 7.991  | -3.210 | -1.292 | 0.00 | 0.00 |
| ATOM | 333 | C6   | RU | 11 | 7.063  | -3.086 | -0.301 | 0.00 | 0.00 |

|      |     |      |    |    |        |        |        |      |      |
|------|-----|------|----|----|--------|--------|--------|------|------|
| ATOM | 334 | H6   | RU | 11 | 7.383  | -2.917 | 0.696  | 0.00 | 0.00 |
| ATOM | 335 | C5   | RU | 11 | 5.749  | -3.191 | -0.567 | 0.00 | 0.00 |
| ATOM | 336 | H5   | RU | 11 | 5.034  | -3.094 | 0.212  | 0.00 | 0.00 |
| ATOM | 337 | C4   | RU | 11 | 5.276  | -3.420 | -1.892 | 0.00 | 0.00 |
| ATOM | 338 | O4   | RU | 11 | 4.121  | -3.564 | -2.211 | 0.00 | 0.00 |
| ATOM | 339 | N3   | RU | 11 | 6.248  | -3.490 | -2.830 | 0.00 | 0.00 |
| ATOM | 340 | H3   | RU | 11 | 5.955  | -3.618 | -3.766 | 0.00 | 0.00 |
| ATOM | 341 | C2   | RU | 11 | 7.583  | -3.372 | -2.604 | 0.00 | 0.00 |
| ATOM | 342 | O2   | RU | 11 | 8.348  | -3.413 | -3.544 | 0.00 | 0.00 |
| ATOM | 343 | C3'  | RU | 11 | 10.036 | -1.253 | 0.170  | 0.00 | 0.00 |
| ATOM | 344 | H3'  | RU | 11 | 9.052  | -0.968 | 0.461  | 0.00 | 0.00 |
| ATOM | 345 | C2'  | RU | 11 | 10.008 | -1.787 | -1.232 | 0.00 | 0.00 |
| ATOM | 346 | 1H2' | RU | 11 | 9.382  | -1.194 | -1.850 | 0.00 | 0.00 |
| ATOM | 347 | O2'  | RU | 11 | 11.278 | -1.900 | -1.786 | 0.00 | 0.00 |
| ATOM | 348 | 2HO' | RU | 11 | 11.598 | -1.435 | -1.823 | 0.00 | 0.00 |
| ATOM | 349 | O3'  | RU | 11 | 10.937 | -0.195 | 0.333  | 0.00 | 0.00 |
| ATOM | 350 | P    | RG | 12 | 10.484 | 1.289  | 0.127  | 0.00 | 0.00 |
| ATOM | 351 | O1P  | RG | 12 | 9.234  | 1.477  | 0.826  | 0.00 | 0.00 |
| ATOM | 352 | O2P  | RG | 12 | 11.605 | 2.142  | 0.463  | 0.00 | 0.00 |
| ATOM | 353 | O5'  | RG | 12 | 10.199 | 1.432  | -1.405 | 0.00 | 0.00 |
| ATOM | 354 | C5'  | RG | 12 | 11.240 | 1.536  | -2.332 | 0.00 | 0.00 |
| ATOM | 355 | 1H5' | RG | 12 | 11.903 | 0.707  | -2.225 | 0.00 | 0.00 |
| ATOM | 356 | 2H5' | RG | 12 | 11.791 | 2.432  | -2.157 | 0.00 | 0.00 |
| ATOM | 357 | C4'  | RG | 12 | 10.724 | 1.563  | -3.751 | 0.00 | 0.00 |
| ATOM | 358 | H4'  | RG | 12 | 11.561 | 1.640  | -4.414 | 0.00 | 0.00 |
| ATOM | 359 | O4'  | RG | 12 | 10.009 | 0.397  | -4.062 | 0.00 | 0.00 |
| ATOM | 360 | C1'  | RG | 12 | 9.000  | 0.715  | -4.986 | 0.00 | 0.00 |
| ATOM | 361 | H1'  | RG | 12 | 9.153  | 0.176  | -5.899 | 0.00 | 0.00 |
| ATOM | 362 | N9   | RG | 12 | 7.671  | 0.358  | -4.468 | 0.00 | 0.00 |
| ATOM | 363 | C8   | RG | 12 | 7.240  | 0.267  | -3.183 | 0.00 | 0.00 |
| ATOM | 364 | H8   | RG | 12 | 7.869  | 0.490  | -2.355 | 0.00 | 0.00 |
| ATOM | 365 | N7   | RG | 12 | 6.013  | -0.124 | -3.057 | 0.00 | 0.00 |
| ATOM | 366 | C5   | RG | 12 | 5.578  | -0.272 | -4.367 | 0.00 | 0.00 |
| ATOM | 367 | C6   | RG | 12 | 4.319  | -0.662 | -4.915 | 0.00 | 0.00 |
| ATOM | 368 | O6   | RG | 12 | 3.302  | -1.011 | -4.348 | 0.00 | 0.00 |
| ATOM | 369 | N1   | RG | 12 | 4.282  | -0.616 | -6.281 | 0.00 | 0.00 |
| ATOM | 370 | H1   | RG | 12 | 3.432  | -0.865 | -6.730 | 0.00 | 0.00 |
| ATOM | 371 | C2   | RG | 12 | 5.332  | -0.275 | -7.039 | 0.00 | 0.00 |
| ATOM | 372 | N2   | RG | 12 | 5.153  | -0.272 | -8.308 | 0.00 | 0.00 |
| ATOM | 373 | H21  | RG | 12 | 4.268  | -0.501 | -8.687 | 0.00 | 0.00 |
| ATOM | 374 | H22  | RG | 12 | 5.915  | -0.030 | -8.879 | 0.00 | 0.00 |
| ATOM | 375 | N3   | RG | 12 | 6.522  | 0.067  | -6.585 | 0.00 | 0.00 |
| ATOM | 376 | C4   | RG | 12 | 6.585  | 0.052  | -5.232 | 0.00 | 0.00 |
| ATOM | 377 | C3'  | RG | 12 | 9.808  | 2.725  | -4.048 | 0.00 | 0.00 |
| ATOM | 378 | H3'  | RG | 12 | 9.108  | 2.830  | -3.248 | 0.00 | 0.00 |
| ATOM | 379 | C2'  | RG | 12 | 9.098  | 2.200  | -5.267 | 0.00 | 0.00 |
| ATOM | 380 | 1H2' | RG | 12 | 8.133  | 2.642  | -5.361 | 0.00 | 0.00 |
| ATOM | 381 | O2'  | RG | 12 | 9.841  | 2.385  | -6.429 | 0.00 | 0.00 |
| ATOM | 382 | 2HO' | RG | 12 | 9.935  | 3.095  | -6.564 | 0.00 | 0.00 |
| ATOM | 383 | O3'  | RG | 12 | 10.517 | 3.916  | -4.285 | 0.00 | 0.00 |
| ATOM | 384 | P    | RC | 13 | 9.826  | 5.313  | -4.191 | 0.00 | 0.00 |
| ATOM | 385 | O1P  | RC | 13 | 9.052  | 5.343  | -2.980 | 0.00 | 0.00 |
| ATOM | 386 | O2P  | RC | 13 | 10.839 | 6.320  | -4.402 | 0.00 | 0.00 |
| ATOM | 387 | O5'  | RC | 13 | 8.854  | 5.352  | -5.406 | 0.00 | 0.00 |
| ATOM | 388 | C5'  | RC | 13 | 8.630  | 5.783  | -6.232 | 0.00 | 0.00 |
| ATOM | 389 | 1H5' | RC | 13 | 9.197  | 5.782  | -6.408 | 0.00 | 0.00 |
| ATOM | 390 | 2H5' | RC | 13 | 8.620  | 6.323  | -5.953 | 0.00 | 0.00 |
| ATOM | 391 | C4'  | RC | 13 | 7.629  | 5.500  | -7.298 | 0.00 | 0.00 |
| ATOM | 392 | H4'  | RC | 13 | 8.088  | 5.671  | -8.237 | 0.00 | 0.00 |
| ATOM | 393 | O4'  | RC | 13 | 7.179  | 4.172  | -7.240 | 0.00 | 0.00 |
| ATOM | 394 | C1'  | RC | 13 | 5.832  | 4.119  | -7.633 | 0.00 | 0.00 |
| ATOM | 395 | H1'  | RC | 13 | 5.739  | 3.496  | -8.494 | 0.00 | 0.00 |
| ATOM | 396 | N1   | RC | 13 | 4.952  | 3.583  | -6.573 | 0.00 | 0.00 |
| ATOM | 397 | C6   | RC | 13 | 5.261  | 3.676  | -5.259 | 0.00 | 0.00 |
| ATOM | 398 | H6   | RC | 13 | 6.166  | 4.142  | -4.967 | 0.00 | 0.00 |
| ATOM | 399 | C5   | RC | 13 | 4.436  | 3.176  | -4.324 | 0.00 | 0.00 |
| ATOM | 400 | H5   | RC | 13 | 4.687  | 3.253  | -3.297 | 0.00 | 0.00 |
| ATOM | 401 | C4   | RC | 13 | 3.252  | 2.575  | -4.761 | 0.00 | 0.00 |



|      |     |      |    |    |        |        |         |      |      |
|------|-----|------|----|----|--------|--------|---------|------|------|
| ATOM | 402 | N4   | RC | 13 | 2.432  | 2.065  | -3.912  | 0.00 | 0.00 |
| ATOM | 403 | H41  | RC | 13 | 1.634  | 1.605  | -4.262  | 0.00 | 0.00 |
| ATOM | 404 | H42  | RC | 13 | 2.648  | 2.085  | -2.959  | 0.00 | 0.00 |
| ATOM | 405 | N3   | RC | 13 | 2.928  | 2.477  | -6.016  | 0.00 | 0.00 |
| ATOM | 406 | C2   | RC | 13 | 3.759  | 2.987  | -6.937  | 0.00 | 0.00 |
| ATOM | 407 | O2   | RC | 13 | 3.422  | 2.917  | -8.102  | 0.00 | 0.00 |
| ATOM | 408 | C3'  | RC | 13 | 6.412  | 6.368  | -7.225  | 0.00 | 0.00 |
| ATOM | 409 | H3'  | RC | 13 | 6.088  | 6.416  | -6.216  | 0.00 | 0.00 |
| ATOM | 410 | C2'  | RC | 13 | 5.444  | 5.531  | -8.010  | 0.00 | 0.00 |
| ATOM | 411 | 1H2' | RC | 13 | 4.448  | 5.744  | -7.731  | 0.00 | 0.00 |
| ATOM | 412 | O2'  | RC | 13 | 5.607  | 5.677  | -9.377  | 0.00 | 0.00 |
| ATOM | 413 | 2HO' | RC | 13 | 5.427  | 6.080  | -9.611  | 0.00 | 0.00 |
| ATOM | 414 | O3'  | RC | 13 | 6.620  | 7.649  | -7.756  | 0.00 | 0.00 |
| ATOM | 415 | P    | RA | 14 | 5.713  | 8.857  | -7.348  | 0.00 | 0.00 |
| ATOM | 416 | O1P  | RA | 14 | 5.543  | 8.836  | -5.912  | 0.00 | 0.00 |
| ATOM | 417 | O2P  | RA | 14 | 6.270  | 10.041 | -7.971  | 0.00 | 0.00 |
| ATOM | 418 | O5'  | RA | 14 | 4.310  | 8.580  | -7.985  | 0.00 | 0.00 |
| ATOM | 419 | C5'  | RA | 14 | 4.080  | 8.752  | -9.348  | 0.00 | 0.00 |
| ATOM | 420 | 1H5' | RA | 14 | 4.826  | 8.229  | -9.904  | 0.00 | 0.00 |
| ATOM | 421 | 2H5' | RA | 14 | 4.141  | 9.783  | -9.603  | 0.00 | 0.00 |
| ATOM | 422 | C4'  | RA | 14 | 2.709  | 8.242  | -9.743  | 0.00 | 0.00 |
| ATOM | 423 | H4'  | RA | 14 | 2.606  | 8.366  | -10.801 | 0.00 | 0.00 |
| ATOM | 424 | O4'  | RA | 14 | 2.554  | 6.875  | -9.441  | 0.00 | 0.00 |
| ATOM | 425 | C1'  | RA | 14 | 1.213  | 6.636  | -9.075  | 0.00 | 0.00 |
| ATOM | 426 | H1'  | RA | 14 | 0.782  | 5.887  | -9.707  | 0.00 | 0.00 |
| ATOM | 427 | N9   | RA | 14 | 1.122  | 6.174  | -7.683  | 0.00 | 0.00 |
| ATOM | 428 | C8   | RA | 14 | 1.956  | 6.411  | -6.634  | 0.00 | 0.00 |
| ATOM | 429 | H8   | RA | 14 | 2.818  | 7.031  | -6.712  | 0.00 | 0.00 |
| ATOM | 430 | N7   | RA | 14 | 1.630  | 5.803  | -5.542  | 0.00 | 0.00 |
| ATOM | 431 | C5   | RA | 14 | 0.464  | 5.136  | -5.891  | 0.00 | 0.00 |
| ATOM | 432 | C6   | RA | 14 | -0.442 | 4.295  | -5.228  | 0.00 | 0.00 |
| ATOM | 433 | N6   | RA | 14 | -0.330 | 3.898  | -3.994  | 0.00 | 0.00 |
| ATOM | 434 | H61  | RA | 14 | -1.019 | 3.285  | -3.635  | 0.00 | 0.00 |
| ATOM | 435 | H62  | RA | 14 | 0.452  | 4.177  | -3.464  | 0.00 | 0.00 |
| ATOM | 436 | N1   | RA | 14 | -1.513 | 3.829  | -5.838  | 0.00 | 0.00 |
| ATOM | 437 | C2   | RA | 14 | -1.712 | 4.180  | -7.086  | 0.00 | 0.00 |
| ATOM | 438 | H2   | RA | 14 | -2.591 | 3.795  | -7.544  | 0.00 | 0.00 |
| ATOM | 439 | N3   | RA | 14 | -0.957 | 4.943  | -7.844  | 0.00 | 0.00 |
| ATOM | 440 | C4   | RA | 14 | 0.132  | 5.389  | -7.181  | 0.00 | 0.00 |
| ATOM | 441 | C3'  | RA | 14 | 1.555  | 8.966  | -9.080  | 0.00 | 0.00 |
| ATOM | 442 | H3'  | RA | 14 | 1.763  | 9.075  | -8.035  | 0.00 | 0.00 |
| ATOM | 443 | C2'  | RA | 14 | 0.465  | 7.938  | -9.265  | 0.00 | 0.00 |
| ATOM | 444 | 1H2' | RA | 14 | -0.302 | 8.055  | -8.530  | 0.00 | 0.00 |
| ATOM | 445 | O2'  | RA | 14 | -0.078 | 7.952  | -10.548 | 0.00 | 0.00 |
| ATOM | 446 | 2HO' | RA | 14 | -0.338 | 8.585  | -10.711 | 0.00 | 0.00 |
| ATOM | 447 | O3'  | RA | 14 | 1.255  | 10.200 | -9.677  | 0.00 | 0.00 |
| ATOM | 448 | P    | RC | 15 | 0.518  | 11.332 | -8.900  | 0.00 | 0.00 |
| ATOM | 449 | O1P  | RC | 15 | 1.134  | 11.456 | -7.597  | 0.00 | 0.00 |
| ATOM | 450 | O2P  | RC | 15 | 0.471  | 12.489 | -9.772  | 0.00 | 0.00 |
| ATOM | 451 | O5'  | RC | 15 | -0.950 | 10.824 | -8.686  | 0.00 | 0.00 |
| ATOM | 452 | C5'  | RC | 15 | -1.892 | 10.848 | -9.712  | 0.00 | 0.00 |
| ATOM | 453 | 1H5' | RC | 15 | -1.457 | 10.465 | -10.602 | 0.00 | 0.00 |
| ATOM | 454 | 2H5' | RC | 15 | -2.194 | 11.851 | -9.896  | 0.00 | 0.00 |
| ATOM | 455 | C4'  | RC | 15 | -3.118 | 10.023 | -9.381  | 0.00 | 0.00 |
| ATOM | 456 | H4'  | RC | 15 | -3.747 | 10.012 | -10.249 | 0.00 | 0.00 |
| ATOM | 457 | O4'  | RC | 15 | -2.774 | 8.693  | -9.057  | 0.00 | 0.00 |
| ATOM | 458 | C1'  | RC | 15 | -3.700 | 8.188  | -8.119  | 0.00 | 0.00 |
| ATOM | 459 | H1'  | RC | 15 | -4.178 | 7.316  | -8.518  | 0.00 | 0.00 |
| ATOM | 460 | N1   | RC | 15 | -3.087 | 7.842  | -6.818  | 0.00 | 0.00 |
| ATOM | 461 | C6   | RC | 15 | -1.975 | 8.458  | -6.345  | 0.00 | 0.00 |
| ATOM | 462 | H6   | RC | 15 | -1.484 | 9.187  | -6.933  | 0.00 | 0.00 |
| ATOM | 463 | C5   | RC | 15 | -1.490 | 8.155  | -5.136  | 0.00 | 0.00 |
| ATOM | 464 | H5   | RC | 15 | -0.620 | 8.639  | -4.771  | 0.00 | 0.00 |
| ATOM | 465 | C4   | RC | 15 | -2.185 | 7.207  | -4.383  | 0.00 | 0.00 |
| ATOM | 466 | N4   | RC | 15 | -1.775 | 6.880  | -3.213  | 0.00 | 0.00 |
| ATOM | 467 | H41  | RC | 15 | -2.280 | 6.184  | -2.732  | 0.00 | 0.00 |
| ATOM | 468 | H42  | RC | 15 | -0.959 | 7.288  | -2.853  | 0.00 | 0.00 |
| ATOM | 469 | N3   | RC | 15 | -3.262 | 6.617  | -4.809  | 0.00 | 0.00 |

|      |     |      |    |    |         |        |        |      |      |
|------|-----|------|----|----|---------|--------|--------|------|------|
| ATOM | 470 | C2   | RC | 15 | -3.731  | 6.915  | -6.025 | 0.00 | 0.00 |
| ATOM | 471 | O2   | RC | 15 | -4.746  | 6.365  | -6.393 | 0.00 | 0.00 |
| ATOM | 472 | C3'  | RC | 15 | -3.955  | 10.524 | -8.227 | 0.00 | 0.00 |
| ATOM | 473 | H3'  | RC | 15 | -3.308  | 10.750 | -7.404 | 0.00 | 0.00 |
| ATOM | 474 | C2'  | RC | 15 | -4.742  | 9.264  | -7.931 | 0.00 | 0.00 |
| ATOM | 475 | 1H2' | RC | 15 | -5.116  | 9.272  | -6.929 | 0.00 | 0.00 |
| ATOM | 476 | O2'  | RC | 15 | -5.780  | 9.039  | -8.843 | 0.00 | 0.00 |
| ATOM | 477 | 2HO' | RC | 15 | -6.137  | 9.443  | -8.972 | 0.00 | 0.00 |
| ATOM | 478 | O3'  | RC | 15 | -4.801  | 11.600 | -8.524 | 0.00 | 0.00 |
| ATOM | 479 | P    | RA | 16 | -5.262  | 12.587 | -7.410 | 0.00 | 0.00 |
| ATOM | 480 | O1P  | RA | 16 | -4.079  | 13.136 | -6.806 | 0.00 | 0.00 |
| ATOM | 481 | O2P  | RA | 16 | -6.216  | 13.491 | -8.014 | 0.00 | 0.00 |
| ATOM | 482 | O5'  | RA | 16 | -6.006  | 11.742 | -6.314 | 0.00 | 0.00 |
| ATOM | 483 | C5'  | RA | 16 | -7.287  | 11.231 | -6.519 | 0.00 | 0.00 |
| ATOM | 484 | 1H5' | RA | 16 | -7.313  | 10.728 | -7.456 | 0.00 | 0.00 |
| ATOM | 485 | 2H5' | RA | 16 | -7.989  | 12.032 | -6.551 | 0.00 | 0.00 |
| ATOM | 486 | C4'  | RA | 16 | -7.707  | 10.257 | -5.438 | 0.00 | 0.00 |
| ATOM | 487 | H4'  | RA | 16 | -8.620  | 9.805  | -5.749 | 0.00 | 0.00 |
| ATOM | 488 | O4'  | RA | 16 | -6.760  | 9.237  | -5.234 | 0.00 | 0.00 |
| ATOM | 489 | C1'  | RA | 16 | -6.728  | 8.890  | -3.875 | 0.00 | 0.00 |
| ATOM | 490 | H1'  | RA | 16 | -6.885  | 7.836  | -3.740 | 0.00 | 0.00 |
| ATOM | 491 | N9   | RA | 16 | -5.446  | 9.248  | -3.258 | 0.00 | 0.00 |
| ATOM | 492 | C8   | RA | 16 | -4.495  | 10.101 | -3.704 | 0.00 | 0.00 |
| ATOM | 493 | H8   | RA | 16 | -4.576  | 10.620 | -4.626 | 0.00 | 0.00 |
| ATOM | 494 | N7   | RA | 16 | -3.485  | 10.226 | -2.914 | 0.00 | 0.00 |
| ATOM | 495 | C5   | RA | 16 | -3.799  | 9.385  | -1.859 | 0.00 | 0.00 |
| ATOM | 496 | C6   | RA | 16 | -3.185  | 9.021  | -0.655 | 0.00 | 0.00 |
| ATOM | 497 | N6   | RA | 16 | -2.045  | 9.461  | -0.238 | 0.00 | 0.00 |
| ATOM | 498 | H61  | RA | 16 | -1.709  | 9.160  | 0.633  | 0.00 | 0.00 |
| ATOM | 499 | H62  | RA | 16 | -1.553  | 10.103 | -0.788 | 0.00 | 0.00 |
| ATOM | 500 | N1   | RA | 16 | -3.750  | 8.181  | 0.180  | 0.00 | 0.00 |
| ATOM | 501 | C2   | RA | 16 | -4.915  | 7.698  | -0.153 | 0.00 | 0.00 |
| ATOM | 502 | H2   | RA | 16 | -5.343  | 7.020  | 0.539  | 0.00 | 0.00 |
| ATOM | 503 | N3   | RA | 16 | -5.613  | 7.936  | -1.236 | 0.00 | 0.00 |
| ATOM | 504 | C4   | RA | 16 | -4.989  | 8.792  | -2.062 | 0.00 | 0.00 |
| ATOM | 505 | C3'  | RA | 16 | -7.971  | 10.875 | -4.090 | 0.00 | 0.00 |
| ATOM | 506 | H3'  | RA | 16 | -7.179  | 11.555 | -3.868 | 0.00 | 0.00 |
| ATOM | 507 | C2'  | RA | 16 | -7.863  | 9.643  | -3.220 | 0.00 | 0.00 |
| ATOM | 508 | 1H2' | RA | 16 | -7.633  | 9.898  | -2.208 | 0.00 | 0.00 |
| ATOM | 509 | O2'  | RA | 16 | -8.999  | 8.825  | -3.265 | 0.00 | 0.00 |
| ATOM | 510 | 2HO' | RA | 16 | -9.333  | 8.792  | -2.961 | 0.00 | 0.00 |
| ATOM | 511 | O3'  | RA | 16 | -9.219  | 11.492 | -3.987 | 0.00 | 0.00 |
| ATOM | 512 | P    | RC | 17 | -9.481  | 12.629 | -2.958 | 0.00 | 0.00 |
| ATOM | 513 | O1P  | RC | 17 | -8.506  | 13.670 | -3.189 | 0.00 | 0.00 |
| ATOM | 514 | O2P  | RC | 17 | -10.879 | 12.966 | -3.040 | 0.00 | 0.00 |
| ATOM | 515 | O5'  | RC | 17 | -9.208  | 12.026 | -1.539 | 0.00 | 0.00 |
| ATOM | 516 | C5'  | RC | 17 | -10.072 | 11.105 | -0.932 | 0.00 | 0.00 |
| ATOM | 517 | 1H5' | RC | 17 | -10.257 | 10.291 | -1.599 | 0.00 | 0.00 |
| ATOM | 518 | 2H5' | RC | 17 | -11.009 | 11.576 | -0.721 | 0.00 | 0.00 |
| ATOM | 519 | C4'  | RC | 17 | -9.506  | 10.545 | 0.357  | 0.00 | 0.00 |
| ATOM | 520 | H4'  | RC | 17 | -10.179 | 9.793  | 0.720  | 0.00 | 0.00 |
| ATOM | 521 | O4'  | RC | 17 | -8.233  | 9.959  | 0.194  | 0.00 | 0.00 |
| ATOM | 522 | C1'  | RC | 17 | -7.452  | 10.177 | 1.354  | 0.00 | 0.00 |
| ATOM | 523 | H1'  | RC | 17 | -7.154  | 9.236  | 1.777  | 0.00 | 0.00 |
| ATOM | 524 | N1   | RC | 17 | -6.236  | 10.972 | 1.081  | 0.00 | 0.00 |
| ATOM | 525 | C6   | RC | 17 | -6.104  | 11.728 | -0.038 | 0.00 | 0.00 |
| ATOM | 526 | H6   | RC | 17 | -6.892  | 11.768 | -0.747 | 0.00 | 0.00 |
| ATOM | 527 | C5   | RC | 17 | -4.980  | 12.413 | -0.255 | 0.00 | 0.00 |
| ATOM | 528 | H5   | RC | 17 | -4.875  | 12.991 | -1.138 | 0.00 | 0.00 |
| ATOM | 529 | C4   | RC | 17 | -3.972  | 12.332 | 0.709  | 0.00 | 0.00 |
| ATOM | 530 | N4   | RC | 17 | -2.872  | 12.962 | 0.535  | 0.00 | 0.00 |
| ATOM | 531 | H41  | RC | 17 | -2.180  | 12.877 | 1.224  | 0.00 | 0.00 |
| ATOM | 532 | H42  | RC | 17 | -2.749  | 13.490 | -0.280 | 0.00 | 0.00 |
| ATOM | 533 | N3   | RC | 17 | -4.074  | 11.629 | 1.800  | 0.00 | 0.00 |
| ATOM | 534 | C2   | RC | 17 | -5.202  | 10.943 | 2.006  | 0.00 | 0.00 |
| ATOM | 535 | O2   | RC | 17 | -5.284  | 10.300 | 3.036  | 0.00 | 0.00 |
| ATOM | 536 | C3'  | RC | 17 | -9.349  | 11.579 | 1.444  | 0.00 | 0.00 |
| ATOM | 537 | H3'  | RC | 17 | -8.897  | 12.453 | 1.023  | 0.00 | 0.00 |

|      |     |      |    |    |         |        |        |      |      |
|------|-----|------|----|----|---------|--------|--------|------|------|
| ATOM | 538 | C2'  | RC | 17 | -8.357  | 10.877 | 2.345  | 0.00 | 0.00 |
| ATOM | 539 | 1H2' | RC | 17 | -7.822  | 11.582 | 2.938  | 0.00 | 0.00 |
| ATOM | 540 | O2'  | RC | 17 | -8.940  | 9.898  | 3.144  | 0.00 | 0.00 |
| ATOM | 541 | 2HO' | RC | 17 | -9.239  | 10.030 | 3.553  | 0.00 | 0.00 |
| ATOM | 542 | O3'  | RC | 17 | -10.561 | 11.883 | 2.073  | 0.00 | 0.00 |
| ATOM | 543 | P    | RA | 18 | -10.770 | 13.228 | 2.830  | 0.00 | 0.00 |
| ATOM | 544 | O1P  | RA | 18 | -10.270 | 14.296 | 2.005  | 0.00 | 0.00 |
| ATOM | 545 | O2P  | RA | 18 | -12.143 | 13.272 | 3.273  | 0.00 | 0.00 |
| ATOM | 546 | O5'  | RA | 18 | -9.852  | 13.138 | 4.091  | 0.00 | 0.00 |
| ATOM | 547 | C5'  | RA | 18 | -10.182 | 12.346 | 5.188  | 0.00 | 0.00 |
| ATOM | 548 | 1H5' | RA | 18 | -10.378 | 11.350 | 4.869  | 0.00 | 0.00 |
| ATOM | 549 | 2H5' | RA | 18 | -11.059 | 12.735 | 5.650  | 0.00 | 0.00 |
| ATOM | 550 | C4'  | RA | 18 | -9.073  | 12.321 | 6.214  | 0.00 | 0.00 |
| ATOM | 551 | H4'  | RA | 18 | -9.379  | 11.681 | 7.011  | 0.00 | 0.00 |
| ATOM | 552 | O4'  | RA | 18 | -7.863  | 11.825 | 5.694  | 0.00 | 0.00 |
| ATOM | 553 | C1'  | RA | 18 | -6.790  | 12.503 | 6.299  | 0.00 | 0.00 |
| ATOM | 554 | H1'  | RA | 18 | -6.105  | 11.807 | 6.741  | 0.00 | 0.00 |
| ATOM | 555 | N9   | RA | 18 | -6.061  | 13.310 | 5.322  | 0.00 | 0.00 |
| ATOM | 556 | C8   | RA | 18 | -6.480  | 13.797 | 4.129  | 0.00 | 0.00 |
| ATOM | 557 | H8   | RA | 18 | -7.454  | 13.625 | 3.751  | 0.00 | 0.00 |
| ATOM | 558 | N7   | RA | 18 | -5.600  | 14.486 | 3.490  | 0.00 | 0.00 |
| ATOM | 559 | C5   | RA | 18 | -4.514  | 14.467 | 4.350  | 0.00 | 0.00 |
| ATOM | 560 | C6   | RA | 18 | -3.230  | 15.011 | 4.331  | 0.00 | 0.00 |
| ATOM | 561 | N6   | RA | 18 | -2.728  | 15.705 | 3.356  | 0.00 | 0.00 |
| ATOM | 562 | H61  | RA | 18 | -1.810  | 16.041 | 3.445  | 0.00 | 0.00 |
| ATOM | 563 | H62  | RA | 18 | -3.265  | 15.864 | 2.550  | 0.00 | 0.00 |
| ATOM | 564 | N1   | RA | 18 | -2.405  | 14.844 | 5.340  | 0.00 | 0.00 |
| ATOM | 565 | C2   | RA | 18 | -2.824  | 14.153 | 6.368  | 0.00 | 0.00 |
| ATOM | 566 | H2   | RA | 18 | -2.134  | 14.038 | 7.166  | 0.00 | 0.00 |
| ATOM | 567 | N3   | RA | 18 | -3.989  | 13.584 | 6.537  | 0.00 | 0.00 |
| ATOM | 568 | C4   | RA | 18 | -4.796  | 13.774 | 5.475  | 0.00 | 0.00 |
| ATOM | 569 | C3'  | RA | 18 | -8.756  | 13.672 | 6.795  | 0.00 | 0.00 |
| ATOM | 570 | H3'  | RA | 18 | -8.666  | 14.375 | 5.996  | 0.00 | 0.00 |
| ATOM | 571 | C2'  | RA | 18 | -7.389  | 13.384 | 7.370  | 0.00 | 0.00 |
| ATOM | 572 | 1H2' | RA | 18 | -6.827  | 14.282 | 7.488  | 0.00 | 0.00 |
| ATOM | 573 | O2'  | RA | 18 | -7.428  | 12.667 | 8.564  | 0.00 | 0.00 |
| ATOM | 574 | 2HO' | RA | 18 | -7.490  | 12.856 | 9.003  | 0.00 | 0.00 |
| ATOM | 575 | O3'  | RA | 18 | -9.692  | 14.112 | 7.729  | 0.00 | 0.00 |
| ATOM | 576 | P    | RG | 19 | -9.860  | 15.630 | 8.045  | 0.00 | 0.00 |
| ATOM | 577 | O1P  | RG | 19 | -9.891  | 16.358 | 6.801  | 0.00 | 0.00 |
| ATOM | 578 | O2P  | RG | 19 | -10.974 | 15.763 | 8.952  | 0.00 | 0.00 |
| ATOM | 579 | O5'  | RG | 19 | -8.556  | 16.034 | 8.800  | 0.00 | 0.00 |
| ATOM | 580 | C5'  | RG | 19 | -8.327  | 15.624 | 10.105 | 0.00 | 0.00 |
| ATOM | 581 | 1H5' | RG | 19 | -8.464  | 14.577 | 10.180 | 0.00 | 0.00 |
| ATOM | 582 | 2H5' | RG | 19 | -9.022  | 16.098 | 10.753 | 0.00 | 0.00 |
| ATOM | 583 | C4'  | RG | 19 | -6.931  | 15.944 | 10.568 | 0.00 | 0.00 |
| ATOM | 584 | H4'  | RG | 19 | -6.806  | 15.535 | 11.545 | 0.00 | 0.00 |
| ATOM | 585 | O4'  | RG | 19 | -5.948  | 15.384 | 9.738  | 0.00 | 0.00 |
| ATOM | 586 | C1'  | RG | 19 | -4.837  | 16.245 | 9.705  | 0.00 | 0.00 |
| ATOM | 587 | H1'  | RG | 19 | -3.946  | 15.732 | 10.007 | 0.00 | 0.00 |
| ATOM | 588 | N9   | RG | 19 | -4.616  | 16.790 | 8.366  | 0.00 | 0.00 |
| ATOM | 589 | C8   | RG | 19 | -5.450  | 16.837 | 7.297  | 0.00 | 0.00 |
| ATOM | 590 | H8   | RG | 19 | -6.436  | 16.446 | 7.324  | 0.00 | 0.00 |
| ATOM | 591 | N7   | RG | 19 | -4.944  | 17.388 | 6.250  | 0.00 | 0.00 |
| ATOM | 592 | C5   | RG | 19 | -3.679  | 17.770 | 6.663  | 0.00 | 0.00 |
| ATOM | 593 | C6   | RG | 19 | -2.628  | 18.454 | 5.996  | 0.00 | 0.00 |
| ATOM | 594 | O6   | RG | 19 | -2.568  | 18.835 | 4.847  | 0.00 | 0.00 |
| ATOM | 595 | N1   | RG | 19 | -1.559  | 18.723 | 6.799  | 0.00 | 0.00 |
| ATOM | 596 | H1   | RG | 19 | -0.822  | 19.253 | 6.412  | 0.00 | 0.00 |
| ATOM | 597 | C2   | RG | 19 | -1.477  | 18.348 | 8.078  | 0.00 | 0.00 |
| ATOM | 598 | N2   | RG | 19 | -0.431  | 18.701 | 8.731  | 0.00 | 0.00 |
| ATOM | 599 | H21  | RG | 19 | 0.257   | 19.264 | 8.297  | 0.00 | 0.00 |
| ATOM | 600 | H22  | RG | 19 | -0.364  | 18.443 | 9.676  | 0.00 | 0.00 |
| ATOM | 601 | N3   | RG | 19 | -2.397  | 17.676 | 8.721  | 0.00 | 0.00 |
| ATOM | 602 | C4   | RG | 19 | -3.486  | 17.424 | 7.963  | 0.00 | 0.00 |
| ATOM | 603 | C3'  | RG | 19 | -6.627  | 17.408 | 10.641 | 0.00 | 0.00 |
| ATOM | 604 | H3'  | RG | 19 | -6.949  | 17.881 | 9.741  | 0.00 | 0.00 |
| ATOM | 605 | C2'  | RG | 19 | -5.115  | 17.358 | 10.676 | 0.00 | 0.00 |

|      |     |      |    |    |        |        |        |      |      |
|------|-----|------|----|----|--------|--------|--------|------|------|
| ATOM | 606 | 1H2' | RG | 19 | -4.695 | 18.283 | 10.355 | 0.00 | 0.00 |
| ATOM | 607 | O2'  | RG | 19 | -4.614 | 16.991 | 11.920 | 0.00 | 0.00 |
| ATOM | 608 | 2HO' | RG | 19 | -4.867 | 17.259 | 12.404 | 0.00 | 0.00 |
| ATOM | 609 | O3'  | RG | 19 | -7.177 | 18.022 | 11.760 | 0.00 | 0.00 |
| ATOM | 610 | P    | RC | 20 | -7.487 | 19.540 | 11.765 | 0.00 | 0.00 |
| ATOM | 611 | O1P  | RC | 20 | -8.212 | 19.849 | 10.562 | 0.00 | 0.00 |
| ATOM | 612 | O2P  | RC | 20 | -8.092 | 19.844 | 13.033 | 0.00 | 0.00 |
| ATOM | 613 | O5'  | RC | 20 | -6.104 | 20.258 | 11.686 | 0.00 | 0.00 |
| ATOM | 614 | C5'  | RC | 20 | -5.235 | 20.291 | 12.774 | 0.00 | 0.00 |
| ATOM | 615 | 1H5' | RC | 20 | -5.041 | 19.306 | 13.114 | 0.00 | 0.00 |
| ATOM | 616 | 2H5' | RC | 20 | -5.683 | 20.829 | 13.571 | 0.00 | 0.00 |
| ATOM | 617 | C4'  | RC | 20 | -3.926 | 20.946 | 12.445 | 0.00 | 0.00 |
| ATOM | 618 | H4'  | RC | 20 | -3.310 | 20.882 | 13.312 | 0.00 | 0.00 |
| ATOM | 619 | O4'  | RC | 20 | -3.263 | 20.332 | 11.380 | 0.00 | 0.00 |
| ATOM | 620 | C1'  | RC | 20 | -2.496 | 21.294 | 10.700 | 0.00 | 0.00 |
| ATOM | 621 | H1'  | RC | 20 | -1.462 | 21.049 | 10.776 | 0.00 | 0.00 |
| ATOM | 622 | N1   | RC | 20 | -2.845 | 21.408 | 9.278  | 0.00 | 0.00 |
| ATOM | 623 | C6   | RC | 20 | -4.034 | 20.994 | 8.802  | 0.00 | 0.00 |
| ATOM | 624 | H6   | RC | 20 | -4.732 | 20.547 | 9.455  | 0.00 | 0.00 |
| ATOM | 625 | C5   | RC | 20 | -4.322 | 21.141 | 7.510  | 0.00 | 0.00 |
| ATOM | 626 | H5   | RC | 20 | -5.248 | 20.807 | 7.133  | 0.00 | 0.00 |
| ATOM | 627 | C4   | RC | 20 | -3.370 | 21.750 | 6.700  | 0.00 | 0.00 |
| ATOM | 628 | N4   | RC | 20 | -3.588 | 21.921 | 5.458  | 0.00 | 0.00 |
| ATOM | 629 | H41  | RC | 20 | -2.878 | 22.333 | 4.924  | 0.00 | 0.00 |
| ATOM | 630 | H42  | RC | 20 | -4.408 | 21.585 | 5.066  | 0.00 | 0.00 |
| ATOM | 631 | N3   | RC | 20 | -2.229 | 22.172 | 7.140  | 0.00 | 0.00 |
| ATOM | 632 | C2   | RC | 20 | -1.948 | 22.010 | 8.428  | 0.00 | 0.00 |
| ATOM | 633 | O2   | RC | 20 | -0.889 | 22.434 | 8.828  | 0.00 | 0.00 |
| ATOM | 634 | C3'  | RC | 20 | -4.048 | 22.392 | 12.077 | 0.00 | 0.00 |
| ATOM | 635 | H3'  | RC | 20 | -4.833 | 22.505 | 11.369 | 0.00 | 0.00 |
| ATOM | 636 | C2'  | RC | 20 | -2.726 | 22.596 | 11.396 | 0.00 | 0.00 |
| ATOM | 637 | 1H2' | RC | 20 | -2.778 | 23.400 | 10.709 | 0.00 | 0.00 |
| ATOM | 638 | O2'  | RC | 20 | -1.696 | 22.791 | 12.289 | 0.00 | 0.00 |
| ATOM | 639 | 2HO' | RC | 20 | -1.775 | 23.414 | 12.600 | 0.00 | 0.00 |
| ATOM | 640 | O3'  | RC | 20 | -4.246 | 23.216 | 13.180 | 0.00 | 0.00 |
| ATOM | 641 | P    | RA | 21 | -4.625 | 24.720 | 13.014 | 0.00 | 0.00 |
| ATOM | 642 | O1P  | RA | 21 | -5.643 | 24.826 | 12.017 | 0.00 | 0.00 |
| ATOM | 643 | O2P  | RA | 21 | -4.872 | 25.245 | 14.316 | 0.00 | 0.00 |
| ATOM | 644 | O5'  | RA | 21 | -3.342 | 25.392 | 12.482 | 0.00 | 0.00 |
| ATOM | 645 | C5'  | RA | 21 | -2.804 | 26.140 | 12.269 | 0.00 | 0.00 |
| ATOM | 646 | 1H5' | RA | 21 | -2.864 | 26.252 | 12.715 | 0.00 | 0.00 |
| ATOM | 647 | 2H5' | RA | 21 | -3.208 | 26.318 | 12.101 | 0.00 | 0.00 |
| ATOM | 648 | C4'  | RA | 21 | -1.557 | 26.568 | 11.672 | 0.00 | 0.00 |
| ATOM | 649 | H4'  | RA | 21 | -0.821 | 26.586 | 12.401 | 0.00 | 0.00 |
| ATOM | 650 | O4'  | RA | 21 | -1.182 | 25.723 | 10.650 | 0.00 | 0.00 |
| ATOM | 651 | C1'  | RA | 21 | -0.657 | 26.468 | 9.622  | 0.00 | 0.00 |
| ATOM | 652 | H1'  | RA | 21 | 0.297  | 26.124 | 9.373  | 0.00 | 0.00 |
| ATOM | 653 | N9   | RA | 21 | -1.503 | 26.353 | 8.448  | 0.00 | 0.00 |
| ATOM | 654 | C8   | RA | 21 | -2.658 | 25.685 | 8.312  | 0.00 | 0.00 |
| ATOM | 655 | H8   | RA | 21 | -3.132 | 25.212 | 9.119  | 0.00 | 0.00 |
| ATOM | 656 | N7   | RA | 21 | -3.125 | 25.666 | 7.124  | 0.00 | 0.00 |
| ATOM | 657 | C5   | RA | 21 | -2.193 | 26.378 | 6.418  | 0.00 | 0.00 |
| ATOM | 658 | C6   | RA | 21 | -2.025 | 26.721 | 5.087  | 0.00 | 0.00 |
| ATOM | 659 | N6   | RA | 21 | -2.819 | 26.384 | 4.134  | 0.00 | 0.00 |
| ATOM | 660 | H61  | RA | 21 | -2.594 | 26.661 | 3.225  | 0.00 | 0.00 |
| ATOM | 661 | H62  | RA | 21 | -3.605 | 25.845 | 4.331  | 0.00 | 0.00 |
| ATOM | 662 | N1   | RA | 21 | -0.999 | 27.420 | 4.695  | 0.00 | 0.00 |
| ATOM | 663 | C2   | RA | 21 | -0.138 | 27.785 | 5.592  | 0.00 | 0.00 |
| ATOM | 664 | H2   | RA | 21 | 0.674  | 28.355 | 5.246  | 0.00 | 0.00 |
| ATOM | 665 | N3   | RA | 21 | -0.145 | 27.528 | 6.865  | 0.00 | 0.00 |
| ATOM | 666 | C4   | RA | 21 | -1.211 | 26.810 | 7.220  | 0.00 | 0.00 |
| ATOM | 667 | C3'  | RA | 21 | -1.631 | 27.923 | 11.118 | 0.00 | 0.00 |
| ATOM | 668 | H3'  | RA | 21 | -2.538 | 28.029 | 10.618 | 0.00 | 0.00 |
| ATOM | 669 | C2'  | RA | 21 | -0.548 | 27.876 | 10.126 | 0.00 | 0.00 |
| ATOM | 670 | 1H2' | RA | 21 | -0.701 | 28.577 | 9.368  | 0.00 | 0.00 |
| ATOM | 671 | O2'  | RA | 21 | 0.686  | 28.046 | 10.701 | 0.00 | 0.00 |
| ATOM | 672 | 2HO' | RA | 21 | 0.742  | 28.420 | 11.023 | 0.00 | 0.00 |
| ATOM | 673 | O3'  | RA | 21 | -1.445 | 28.891 | 12.088 | 0.00 | 0.00 |

|      |     |      |     |    |        |        |        |      |      |
|------|-----|------|-----|----|--------|--------|--------|------|------|
| ATOM | 674 | P    | RA  | 22 | -2.138 | 30.252 | 11.996 | 0.00 | 0.00 |
| ATOM | 675 | O1P  | RA  | 22 | -3.504 | 30.031 | 11.650 | 0.00 | 0.00 |
| ATOM | 676 | O2P  | RA  | 22 | -1.834 | 30.967 | 13.196 | 0.00 | 0.00 |
| ATOM | 677 | O5'  | RA  | 22 | -1.465 | 30.980 | 10.815 | 0.00 | 0.00 |
| ATOM | 678 | C5'  | RA  | 22 | -0.149 | 31.395 | 10.865 | 0.00 | 0.00 |
| ATOM | 679 | 1H5' | RA  | 22 | 0.481  | 30.558 | 10.960 | 0.00 | 0.00 |
| ATOM | 680 | 2H5' | RA  | 22 | 0.002  | 32.006 | 11.708 | 0.00 | 0.00 |
| ATOM | 681 | C4'  | RA  | 22 | 0.249  | 32.169 | 9.646  | 0.00 | 0.00 |
| ATOM | 682 | H4'  | RA  | 22 | 1.277  | 32.396 | 9.743  | 0.00 | 0.00 |
| ATOM | 683 | O4'  | RA  | 22 | 0.044  | 31.417 | 8.496  | 0.00 | 0.00 |
| ATOM | 684 | C1'  | RA  | 22 | -0.872 | 32.070 | 7.683  | 0.00 | 0.00 |
| ATOM | 685 | H1'  | RA  | 22 | -0.356 | 32.646 | 6.956  | 0.00 | 0.00 |
| ATOM | 686 | N9   | RA  | 22 | -1.746 | 31.132 | 7.008  | 0.00 | 0.00 |
| ATOM | 687 | C8   | RA  | 22 | -2.679 | 30.314 | 7.526  | 0.00 | 0.00 |
| ATOM | 688 | H8   | RA  | 22 | -2.808 | 30.200 | 8.564  | 0.00 | 0.00 |
| ATOM | 689 | N7   | RA  | 22 | -3.396 | 29.699 | 6.659  | 0.00 | 0.00 |
| ATOM | 690 | C5   | RA  | 22 | -2.889 | 30.160 | 5.466  | 0.00 | 0.00 |
| ATOM | 691 | C6   | RA  | 22 | -3.187 | 29.958 | 4.122  | 0.00 | 0.00 |
| ATOM | 692 | N6   | RA  | 22 | -4.132 | 29.205 | 3.670  | 0.00 | 0.00 |
| ATOM | 693 | H61  | RA  | 22 | -4.252 | 29.122 | 2.704  | 0.00 | 0.00 |
| ATOM | 694 | H62  | RA  | 22 | -4.678 | 28.710 | 4.303  | 0.00 | 0.00 |
| ATOM | 695 | N1   | RA  | 22 | -2.513 | 30.559 | 3.181  | 0.00 | 0.00 |
| ATOM | 696 | C2   | RA  | 22 | -1.551 | 31.349 | 3.542  | 0.00 | 0.00 |
| ATOM | 697 | H2   | RA  | 22 | -1.023 | 31.816 | 2.763  | 0.00 | 0.00 |
| ATOM | 698 | N3   | RA  | 22 | -1.151 | 31.641 | 4.746  | 0.00 | 0.00 |
| ATOM | 699 | C4   | RA  | 22 | -1.872 | 31.010 | 5.675  | 0.00 | 0.00 |
| ATOM | 700 | C3'  | RA  | 22 | -0.508 | 33.451 | 9.489  | 0.00 | 0.00 |
| ATOM | 701 | H3'  | RA  | 22 | -0.872 | 33.778 | 10.424 | 0.00 | 0.00 |
| ATOM | 702 | C2'  | RA  | 22 | -1.612 | 33.005 | 8.570  | 0.00 | 0.00 |
| ATOM | 703 | 1H2' | RA  | 22 | -2.323 | 32.460 | 9.138  | 0.00 | 0.00 |
| ATOM | 704 | O2'  | RA  | 22 | -2.266 | 34.005 | 7.879  | 0.00 | 0.00 |
| ATOM | 705 | 2HO' | RA  | 22 | -1.677 | 34.655 | 7.668  | 0.00 | 0.00 |
| ATOM | 706 | O3'  | RA  | 22 | 0.371  | 34.368 | 8.930  | 0.00 | 0.00 |
| ATOM | 707 | P    | RG3 | 23 | 0.102  | 35.875 | 8.878  | 0.00 | 0.00 |
| ATOM | 708 | O1P  | RG3 | 23 | -0.852 | 36.198 | 9.862  | 0.00 | 0.00 |
| ATOM | 709 | O2P  | RG3 | 23 | 1.346  | 36.554 | 8.873  | 0.00 | 0.00 |
| ATOM | 710 | O5'  | RG3 | 23 | -0.551 | 36.061 | 7.497  | 0.00 | 0.00 |
| ATOM | 711 | C5'  | RG3 | 23 | 0.181  | 36.083 | 6.357  | 0.00 | 0.00 |
| ATOM | 712 | 1H5' | RG3 | 23 | 0.724  | 35.210 | 6.276  | 0.00 | 0.00 |
| ATOM | 713 | 2H5' | RG3 | 23 | 0.845  | 36.887 | 6.406  | 0.00 | 0.00 |
| ATOM | 714 | C4'  | RG3 | 23 | -0.646 | 36.234 | 5.143  | 0.00 | 0.00 |
| ATOM | 715 | H4'  | RG3 | 23 | -0.009 | 36.451 | 4.350  | 0.00 | 0.00 |
| ATOM | 716 | O4'  | RG3 | 23 | -1.321 | 35.072 | 4.826  | 0.00 | 0.00 |
| ATOM | 717 | C1'  | RG3 | 23 | -2.496 | 35.427 | 4.246  | 0.00 | 0.00 |
| ATOM | 718 | H1'  | RG3 | 23 | -2.320 | 35.766 | 3.278  | 0.00 | 0.00 |
| ATOM | 719 | N9   | RG3 | 23 | -3.467 | 34.359 | 4.168  | 0.00 | 0.00 |
| ATOM | 720 | C8   | RG3 | 23 | -4.077 | 33.690 | 5.145  | 0.00 | 0.00 |
| ATOM | 721 | H8   | RG3 | 23 | -3.845 | 33.831 | 6.150  | 0.00 | 0.00 |
| ATOM | 722 | N7   | RG3 | 23 | -4.962 | 32.863 | 4.754  | 0.00 | 0.00 |
| ATOM | 723 | C5   | RG3 | 23 | -4.948 | 32.999 | 3.405  | 0.00 | 0.00 |
| ATOM | 724 | C6   | RG3 | 23 | -5.706 | 32.379 | 2.400  | 0.00 | 0.00 |
| ATOM | 725 | O6   | RG3 | 23 | -6.555 | 31.539 | 2.489  | 0.00 | 0.00 |
| ATOM | 726 | N1   | RG3 | 23 | -5.421 | 32.827 | 1.176  | 0.00 | 0.00 |
| ATOM | 727 | H1   | RG3 | 23 | -5.938 | 32.453 | 0.440  | 0.00 | 0.00 |
| ATOM | 728 | C2   | RG3 | 23 | -4.513 | 33.751 | 0.925  | 0.00 | 0.00 |
| ATOM | 729 | N2   | RG3 | 23 | -4.377 | 34.105 | -0.279 | 0.00 | 0.00 |
| ATOM | 730 | H21  | RG3 | 23 | -4.990 | 33.770 | -0.954 | 0.00 | 0.00 |
| ATOM | 731 | H22  | RG3 | 23 | -3.727 | 34.800 | -0.478 | 0.00 | 0.00 |
| ATOM | 732 | N3   | RG3 | 23 | -3.774 | 34.336 | 1.811  | 0.00 | 0.00 |
| ATOM | 733 | C4   | RG3 | 23 | -4.039 | 33.920 | 3.042  | 0.00 | 0.00 |
| ATOM | 734 | C3'  | RG3 | 23 | -1.648 | 37.311 | 5.240  | 0.00 | 0.00 |
| ATOM | 735 | H3'  | RG3 | 23 | -1.623 | 37.773 | 6.166  | 0.00 | 0.00 |
| ATOM | 736 | C2'  | RG3 | 23 | -2.913 | 36.577 | 5.050  | 0.00 | 0.00 |
| ATOM | 737 | 1H2' | RG3 | 23 | -3.236 | 36.242 | 5.962  | 0.00 | 0.00 |
| ATOM | 738 | O2'  | RG3 | 23 | -3.856 | 37.299 | 4.435  | 0.00 | 0.00 |
| ATOM | 739 | 2HO' | RG3 | 23 | -4.148 | 37.568 | 4.597  | 0.00 | 0.00 |
| ATOM | 740 | O3'  | RG3 | 23 | -1.484 | 38.217 | 4.258  | 0.00 | 0.00 |
| ATOM | 741 | H3T  | RG3 | 23 | -1.839 | 38.568 | 4.177  | 0.00 | 0.00 |

|      |     |      |     |    |        |         |         |      |      |
|------|-----|------|-----|----|--------|---------|---------|------|------|
| ATOM | 742 | H5T  | RC5 | 24 | 10.548 | -27.109 | -11.732 | 0.00 | 0.00 |
| ATOM | 743 | O5'  | RC5 | 24 | 10.294 | -26.875 | -11.943 | 0.00 | 0.00 |
| ATOM | 744 | C5'  | RC5 | 24 | 9.131  | -26.297 | -11.680 | 0.00 | 0.00 |
| ATOM | 745 | 1H5' | RC5 | 24 | 8.996  | -25.523 | -12.327 | 0.00 | 0.00 |
| ATOM | 746 | 2H5' | RC5 | 24 | 9.160  | -25.933 | -10.741 | 0.00 | 0.00 |
| ATOM | 747 | C4'  | RC5 | 24 | 8.003  | -27.221 | -11.814 | 0.00 | 0.00 |
| ATOM | 748 | H4'  | RC5 | 24 | 8.045  | -27.660 | -12.745 | 0.00 | 0.00 |
| ATOM | 749 | O4'  | RC5 | 24 | 8.020  | -28.178 | -10.835 | 0.00 | 0.00 |
| ATOM | 750 | C1'  | RC5 | 24 | 6.726  | -28.602 | -10.565 | 0.00 | 0.00 |
| ATOM | 751 | H1'  | RC5 | 24 | 6.602  | -29.582 | -10.923 | 0.00 | 0.00 |
| ATOM | 752 | N1   | RC5 | 24 | 6.416  | -28.599 | -9.132  | 0.00 | 0.00 |
| ATOM | 753 | C6   | RC5 | 24 | 7.038  | -27.822 | -8.280  | 0.00 | 0.00 |
| ATOM | 754 | H6   | RC5 | 24 | 7.760  | -27.172 | -8.644  | 0.00 | 0.00 |
| ATOM | 755 | C5   | RC5 | 24 | 6.750  | -27.877 | -6.983  | 0.00 | 0.00 |
| ATOM | 756 | H5   | RC5 | 24 | 7.242  | -27.274 | -6.315  | 0.00 | 0.00 |
| ATOM | 757 | C4   | RC5 | 24 | 5.795  | -28.756 | -6.558  | 0.00 | 0.00 |
| ATOM | 758 | N4   | RC5 | 24 | 5.484  | -28.875 | -5.329  | 0.00 | 0.00 |
| ATOM | 759 | H41  | RC5 | 24 | 4.778  | -29.481 | -5.086  | 0.00 | 0.00 |
| ATOM | 760 | H42  | RC5 | 24 | 5.909  | -28.327 | -4.683  | 0.00 | 0.00 |
| ATOM | 761 | N3   | RC5 | 24 | 5.167  | -29.497 | -7.359  | 0.00 | 0.00 |
| ATOM | 762 | C2   | RC5 | 24 | 5.458  | -29.429 | -8.651  | 0.00 | 0.00 |
| ATOM | 763 | O2   | RC5 | 24 | 4.842  | -30.116 | -9.380  | 0.00 | 0.00 |
| ATOM | 764 | C3'  | RC5 | 24 | 6.693  | -26.558 | -11.680 | 0.00 | 0.00 |
| ATOM | 765 | H3'  | RC5 | 24 | 6.731  | -25.928 | -10.861 | 0.00 | 0.00 |
| ATOM | 766 | C2'  | RC5 | 24 | 5.828  | -27.706 | -11.353 | 0.00 | 0.00 |
| ATOM | 767 | 1H2' | RC5 | 24 | 5.003  | -27.398 | -10.797 | 0.00 | 0.00 |
| ATOM | 768 | O2'  | RC5 | 24 | 5.435  | -28.366 | -12.472 | 0.00 | 0.00 |
| ATOM | 769 | 2HO' | RC5 | 24 | 5.163  | -27.927 | -12.962 | 0.00 | 0.00 |
| ATOM | 770 | O3'  | RC5 | 24 | 6.308  | -25.890 | -12.817 | 0.00 | 0.00 |
| ATOM | 771 | P    | RU  | 25 | 5.280  | -24.763 | -12.772 | 0.00 | 0.00 |
| ATOM | 772 | O1P  | RU  | 25 | 5.591  | -23.931 | -11.675 | 0.00 | 0.00 |
| ATOM | 773 | O2P  | RU  | 25 | 5.224  | -24.181 | -14.071 | 0.00 | 0.00 |
| ATOM | 774 | O5'  | RU  | 25 | 3.939  | -25.466 | -12.466 | 0.00 | 0.00 |
| ATOM | 775 | C5'  | RU  | 25 | 3.222  | -26.120 | -13.440 | 0.00 | 0.00 |
| ATOM | 776 | 1H5' | RU  | 25 | 3.823  | -26.842 | -13.903 | 0.00 | 0.00 |
| ATOM | 777 | 2H5' | RU  | 25 | 2.913  | -25.424 | -14.170 | 0.00 | 0.00 |
| ATOM | 778 | C4'  | RU  | 25 | 2.013  | -26.812 | -12.892 | 0.00 | 0.00 |
| ATOM | 779 | H4'  | RU  | 25 | 1.528  | -27.311 | -13.692 | 0.00 | 0.00 |
| ATOM | 780 | O4'  | RU  | 25 | 2.344  | -27.759 | -11.914 | 0.00 | 0.00 |
| ATOM | 781 | C1'  | RU  | 25 | 1.299  | -27.843 | -10.990 | 0.00 | 0.00 |
| ATOM | 782 | H1'  | RU  | 25 | 0.884  | -28.826 | -11.017 | 0.00 | 0.00 |
| ATOM | 783 | N1   | RU  | 25 | 1.741  | -27.568 | -9.617  | 0.00 | 0.00 |
| ATOM | 784 | C6   | RU  | 25 | 2.792  | -26.778 | -9.341  | 0.00 | 0.00 |
| ATOM | 785 | H6   | RU  | 25 | 3.286  | -26.295 | -10.136 | 0.00 | 0.00 |
| ATOM | 786 | C5   | RU  | 25 | 3.215  | -26.606 | -8.082  | 0.00 | 0.00 |
| ATOM | 787 | H5   | RU  | 25 | 4.040  | -25.993 | -7.876  | 0.00 | 0.00 |
| ATOM | 788 | C4   | RU  | 25 | 2.575  | -27.232 | -6.991  | 0.00 | 0.00 |
| ATOM | 789 | O4   | RU  | 25 | 2.900  | -27.152 | -5.834  | 0.00 | 0.00 |
| ATOM | 790 | N3   | RU  | 25 | 1.500  | -27.948 | -7.335  | 0.00 | 0.00 |
| ATOM | 791 | H3   | RU  | 25 | 0.985  | -28.344 | -6.596  | 0.00 | 0.00 |
| ATOM | 792 | C2   | RU  | 25 | 1.028  | -28.127 | -8.590  | 0.00 | 0.00 |
| ATOM | 793 | O2   | RU  | 25 | 0.014  | -28.744 | -8.750  | 0.00 | 0.00 |
| ATOM | 794 | C3'  | RU  | 25 | 1.025  | -25.889 | -12.266 | 0.00 | 0.00 |
| ATOM | 795 | H3'  | RU  | 25 | 1.536  | -25.217 | -11.627 | 0.00 | 0.00 |
| ATOM | 796 | C2'  | RU  | 25 | 0.249  | -26.870 | -11.440 | 0.00 | 0.00 |
| ATOM | 797 | 1H2' | RU  | 25 | -0.207 | -26.391 | -10.617 | 0.00 | 0.00 |
| ATOM | 798 | O2'  | RU  | 25 | -0.685 | -27.571 | -12.186 | 0.00 | 0.00 |
| ATOM | 799 | 2HO' | RU  | 25 | -1.152 | -27.273 | -12.367 | 0.00 | 0.00 |
| ATOM | 800 | O3'  | RU  | 25 | 0.243  | -25.203 | -13.190 | 0.00 | 0.00 |
| ATOM | 801 | P    | RU  | 26 | -0.476 | -23.887 | -12.811 | 0.00 | 0.00 |
| ATOM | 802 | O1P  | RU  | 26 | 0.481  | -23.031 | -12.182 | 0.00 | 0.00 |
| ATOM | 803 | O2P  | RU  | 26 | -1.160 | -23.423 | -13.989 | 0.00 | 0.00 |
| ATOM | 804 | O5'  | RU  | 26 | -1.533 | -24.267 | -11.739 | 0.00 | 0.00 |
| ATOM | 805 | C5'  | RU  | 26 | -2.723 | -24.884 | -12.085 | 0.00 | 0.00 |
| ATOM | 806 | 1H5' | RU  | 26 | -2.520 | -25.734 | -12.678 | 0.00 | 0.00 |
| ATOM | 807 | 2H5' | RU  | 26 | -3.312 | -24.220 | -12.655 | 0.00 | 0.00 |
| ATOM | 808 | C4'  | RU  | 26 | -3.507 | -25.302 | -10.875 | 0.00 | 0.00 |
| ATOM | 809 | H4'  | RU  | 26 | -4.373 | -25.816 | -11.214 | 0.00 | 0.00 |

|      |     |      |    |    |        |         |         |      |      |
|------|-----|------|----|----|--------|---------|---------|------|------|
| ATOM | 810 | O4'  | RU | 26 | -2.774 | -26.151 | -10.042 | 0.00 | 0.00 |
| ATOM | 811 | C1'  | RU | 26 | -3.203 | -25.979 | -8.715  | 0.00 | 0.00 |
| ATOM | 812 | H1'  | RU | 26 | -3.663 | -26.883 | -8.379  | 0.00 | 0.00 |
| ATOM | 813 | N1   | RU | 26 | -2.099 | -25.643 | -7.799  | 0.00 | 0.00 |
| ATOM | 814 | C6   | RU | 26 | -1.013 | -24.943 | -8.201  | 0.00 | 0.00 |
| ATOM | 815 | H6   | RU | 26 | -0.948 | -24.626 | -9.203  | 0.00 | 0.00 |
| ATOM | 816 | C5   | RU | 26 | -0.024 | -24.646 | -7.341  | 0.00 | 0.00 |
| ATOM | 817 | H5   | RU | 26 | 0.821  | -24.104 | -7.662  | 0.00 | 0.00 |
| ATOM | 818 | C4   | RU | 26 | -0.075 | -25.028 | -5.982  | 0.00 | 0.00 |
| ATOM | 819 | O4   | RU | 26 | 0.776  | -24.810 | -5.157  | 0.00 | 0.00 |
| ATOM | 820 | N3   | RU | 26 | -1.194 | -25.695 | -5.648  | 0.00 | 0.00 |
| ATOM | 821 | H3   | RU | 26 | -1.285 | -25.940 | -4.701  | 0.00 | 0.00 |
| ATOM | 822 | C2   | RU | 26 | -2.222 | -26.006 | -6.482  | 0.00 | 0.00 |
| ATOM | 823 | O2   | RU | 26 | -3.191 | -26.565 | -6.045  | 0.00 | 0.00 |
| ATOM | 824 | C3'  | RU | 26 | -3.963 | -24.169 | -10.008 | 0.00 | 0.00 |
| ATOM | 825 | H3'  | RU | 26 | -3.160 | -23.501 | -9.865  | 0.00 | 0.00 |
| ATOM | 826 | C2'  | RU | 26 | -4.248 | -24.891 | -8.729  | 0.00 | 0.00 |
| ATOM | 827 | 1H2' | RU | 26 | -4.150 | -24.239 | -7.895  | 0.00 | 0.00 |
| ATOM | 828 | O2'  | RU | 26 | -5.501 | -25.482 | -8.730  | 0.00 | 0.00 |
| ATOM | 829 | 2HO' | RU | 26 | -6.027 | -24.971 | -8.830  | 0.00 | 0.00 |
| ATOM | 830 | O3'  | RU | 26 | -5.066 | -23.520 | -10.527 | 0.00 | 0.00 |
| ATOM | 831 | P    | RG | 27 | -5.475 | -22.123 | -10.032 | 0.00 | 0.00 |
| ATOM | 832 | O1P  | RG | 27 | -4.320 | -21.312 | -10.012 | 0.00 | 0.00 |
| ATOM | 833 | O2P  | RG | 27 | -6.592 | -21.721 | -10.815 | 0.00 | 0.00 |
| ATOM | 834 | O5'  | RG | 27 | -5.938 | -22.327 | -8.567  | 0.00 | 0.00 |
| ATOM | 835 | C5'  | RG | 27 | -6.638 | -22.199 | -7.924  | 0.00 | 0.00 |
| ATOM | 836 | 1H5' | RG | 27 | -7.053 | -22.412 | -8.257  | 0.00 | 0.00 |
| ATOM | 837 | 2H5' | RG | 27 | -6.647 | -21.613 | -8.103  | 0.00 | 0.00 |
| ATOM | 838 | C4'  | RG | 27 | -6.841 | -22.584 | -6.518  | 0.00 | 0.00 |
| ATOM | 839 | H4'  | RG | 27 | -7.800 | -23.014 | -6.438  | 0.00 | 0.00 |
| ATOM | 840 | O4'  | RG | 27 | -5.884 | -23.495 | -6.086  | 0.00 | 0.00 |
| ATOM | 841 | C1'  | RG | 27 | -5.575 | -23.270 | -4.745  | 0.00 | 0.00 |
| ATOM | 842 | H1'  | RG | 27 | -5.790 | -24.126 | -4.165  | 0.00 | 0.00 |
| ATOM | 843 | N9   | RG | 27 | -4.161 | -22.955 | -4.556  | 0.00 | 0.00 |
| ATOM | 844 | C8   | RG | 27 | -3.243 | -22.566 | -5.470  | 0.00 | 0.00 |
| ATOM | 845 | H8   | RG | 27 | -3.488 | -22.429 | -6.493  | 0.00 | 0.00 |
| ATOM | 846 | N7   | RG | 27 | -2.055 | -22.386 | -4.993  | 0.00 | 0.00 |
| ATOM | 847 | C5   | RG | 27 | -2.197 | -22.655 | -3.643  | 0.00 | 0.00 |
| ATOM | 848 | C6   | RG | 27 | -1.268 | -22.622 | -2.561  | 0.00 | 0.00 |
| ATOM | 849 | O6   | RG | 27 | -0.078 | -22.372 | -2.567  | 0.00 | 0.00 |
| ATOM | 850 | N1   | RG | 27 | -1.836 | -22.907 | -1.355  | 0.00 | 0.00 |
| ATOM | 851 | H1   | RG | 27 | -1.246 | -22.886 | -0.557  | 0.00 | 0.00 |
| ATOM | 852 | C2   | RG | 27 | -3.129 | -23.219 | -1.194  | 0.00 | 0.00 |
| ATOM | 853 | N2   | RG | 27 | -3.533 | -23.440 | 0.005   | 0.00 | 0.00 |
| ATOM | 854 | H21  | RG | 27 | -2.901 | -23.369 | 0.765   | 0.00 | 0.00 |
| ATOM | 855 | H22  | RG | 27 | -4.481 | -23.678 | 0.137   | 0.00 | 0.00 |
| ATOM | 856 | N3   | RG | 27 | -4.019 | -23.282 | -2.163  | 0.00 | 0.00 |
| ATOM | 857 | C4   | RG | 27 | -3.494 | -22.985 | -3.370  | 0.00 | 0.00 |
| ATOM | 858 | C3'  | RG | 27 | -6.773 | -21.442 | -5.577  | 0.00 | 0.00 |
| ATOM | 859 | H3'  | RG | 27 | -5.964 | -20.825 | -5.837  | 0.00 | 0.00 |
| ATOM | 860 | C2'  | RG | 27 | -6.442 | -22.143 | -4.299  | 0.00 | 0.00 |
| ATOM | 861 | 1H2' | RG | 27 | -5.916 | -21.507 | -3.637  | 0.00 | 0.00 |
| ATOM | 862 | O2'  | RG | 27 | -7.563 | -22.658 | -3.701  | 0.00 | 0.00 |
| ATOM | 863 | 2HO' | RG | 27 | -8.081 | -22.027 | -3.540  | 0.00 | 0.00 |
| ATOM | 864 | O3'  | RG | 27 | -7.967 | -20.739 | -5.551  | 0.00 | 0.00 |
| ATOM | 865 | P    | RC | 28 | -8.050 | -19.336 | -4.894  | 0.00 | 0.00 |
| ATOM | 866 | O1P  | RC | 28 | -7.004 | -18.535 | -5.430  | 0.00 | 0.00 |
| ATOM | 867 | O2P  | RC | 28 | -9.399 | -18.902 | -5.020  | 0.00 | 0.00 |
| ATOM | 868 | O5'  | RC | 28 | -7.768 | -19.585 | -3.386  | 0.00 | 0.00 |
| ATOM | 869 | C5'  | RC | 28 | -7.135 | -18.656 | -2.585  | 0.00 | 0.00 |
| ATOM | 870 | 1H5' | RC | 28 | -7.759 | -17.815 | -2.470  | 0.00 | 0.00 |
| ATOM | 871 | 2H5' | RC | 28 | -6.240 | -18.344 | -3.038  | 0.00 | 0.00 |
| ATOM | 872 | C4'  | RC | 28 | -6.821 | -19.235 | -1.234  | 0.00 | 0.00 |
| ATOM | 873 | H4'  | RC | 28 | -7.715 | -19.631 | -0.813  | 0.00 | 0.00 |
| ATOM | 874 | O4'  | RC | 28 | -5.860 | -20.251 | -1.303  | 0.00 | 0.00 |
| ATOM | 875 | C1'  | RC | 28 | -4.921 | -20.114 | -0.256  | 0.00 | 0.00 |
| ATOM | 876 | H1'  | RC | 28 | -4.849 | -21.035 | 0.285   | 0.00 | 0.00 |
| ATOM | 877 | N1   | RC | 28 | -3.571 | -19.760 | -0.757  | 0.00 | 0.00 |

|      |     |      |    |    |        |         |        |      |      |
|------|-----|------|----|----|--------|---------|--------|------|------|
| ATOM | 878 | C6   | RC | 28 | -3.339 | -19.471 | -2.060 | 0.00 | 0.00 |
| ATOM | 879 | H6   | RC | 28 | -4.144 | -19.464 | -2.752 | 0.00 | 0.00 |
| ATOM | 880 | C5   | RC | 28 | -2.092 | -19.219 | -2.485 | 0.00 | 0.00 |
| ATOM | 881 | H5   | RC | 28 | -1.917 | -19.010 | -3.508 | 0.00 | 0.00 |
| ATOM | 882 | C4   | RC | 28 | -1.060 | -19.267 | -1.544 | 0.00 | 0.00 |
| ATOM | 883 | N4   | RC | 28 | 0.149  | -19.035 | -1.896 | 0.00 | 0.00 |
| ATOM | 884 | H41  | RC | 28 | 0.850  | -19.130 | -1.209 | 0.00 | 0.00 |
| ATOM | 885 | H42  | RC | 28 | 0.343  | -18.824 | -2.827 | 0.00 | 0.00 |
| ATOM | 886 | N3   | RC | 28 | -1.252 | -19.548 | -0.295 | 0.00 | 0.00 |
| ATOM | 887 | C2   | RC | 28 | -2.499 | -19.797 | 0.123  | 0.00 | 0.00 |
| ATOM | 888 | O2   | RC | 28 | -2.648 | -20.056 | 1.296  | 0.00 | 0.00 |
| ATOM | 889 | C3'  | RC | 28 | -6.261 | -18.189 | -0.295 | 0.00 | 0.00 |
| ATOM | 890 | H3'  | RC | 28 | -5.580 | -17.567 | -0.832 | 0.00 | 0.00 |
| ATOM | 891 | C2'  | RC | 28 | -5.484 | -19.054 | 0.664  | 0.00 | 0.00 |
| ATOM | 892 | 1H2' | RC | 28 | -4.720 | -18.487 | 1.161  | 0.00 | 0.00 |
| ATOM | 893 | O2'  | RC | 28 | -6.312 | -19.686 | 1.595  | 0.00 | 0.00 |
| ATOM | 894 | 2HO' | RC | 28 | -6.707 | -19.410 | 1.829  | 0.00 | 0.00 |
| ATOM | 895 | O3'  | RC | 28 | -7.254 | -17.437 | 0.331  | 0.00 | 0.00 |
| ATOM | 896 | P    | RU | 29 | -6.982 | -15.969 | 0.786  | 0.00 | 0.00 |
| ATOM | 897 | O1P  | RU | 29 | -6.477 | -15.245 | -0.348 | 0.00 | 0.00 |
| ATOM | 898 | O2P  | RU | 29 | -8.175 | -15.492 | 1.440  | 0.00 | 0.00 |
| ATOM | 899 | O5'  | RU | 29 | -5.835 | -16.045 | 1.843  | 0.00 | 0.00 |
| ATOM | 900 | C5'  | RU | 29 | -6.056 | -16.486 | 3.140  | 0.00 | 0.00 |
| ATOM | 901 | 1H5' | RU | 29 | -6.407 | -17.489 | 3.116  | 0.00 | 0.00 |
| ATOM | 902 | 2H5' | RU | 29 | -6.795 | -15.879 | 3.603  | 0.00 | 0.00 |
| ATOM | 903 | C4'  | RU | 29 | -4.816 | -16.416 | 3.987  | 0.00 | 0.00 |
| ATOM | 904 | H4'  | RU | 29 | -5.072 | -16.731 | 4.973  | 0.00 | 0.00 |
| ATOM | 905 | O4'  | RU | 29 | -3.785 | -17.236 | 3.509  | 0.00 | 0.00 |
| ATOM | 906 | C1'  | RU | 29 | -2.546 | -16.664 | 3.873  | 0.00 | 0.00 |
| ATOM | 907 | H1'  | RU | 29 | -2.057 | -17.300 | 4.583  | 0.00 | 0.00 |
| ATOM | 908 | N1   | RU | 29 | -1.643 | -16.493 | 2.715  | 0.00 | 0.00 |
| ATOM | 909 | C6   | RU | 29 | -2.112 | -16.354 | 1.444  | 0.00 | 0.00 |
| ATOM | 910 | H6   | RU | 29 | -3.162 | -16.350 | 1.271  | 0.00 | 0.00 |
| ATOM | 911 | C5   | RU | 29 | -1.258 | -16.238 | 0.410  | 0.00 | 0.00 |
| ATOM | 912 | H5   | RU | 29 | -1.632 | -16.149 | -0.579 | 0.00 | 0.00 |
| ATOM | 913 | C4   | RU | 29 | 0.156  | -16.242 | 0.596  | 0.00 | 0.00 |
| ATOM | 914 | O4   | RU | 29 | 0.990  | -16.161 | -0.276 | 0.00 | 0.00 |
| ATOM | 915 | N3   | RU | 29 | 0.545  | -16.349 | 1.887  | 0.00 | 0.00 |
| ATOM | 916 | H3   | RU | 29 | 1.522  | -16.334 | 2.061  | 0.00 | 0.00 |
| ATOM | 917 | C2   | RU | 29 | -0.281 | -16.455 | 2.962  | 0.00 | 0.00 |
| ATOM | 918 | O2   | RU | 29 | 0.203  | -16.510 | 4.075  | 0.00 | 0.00 |
| ATOM | 919 | C3'  | RU | 29 | -4.241 | -15.027 | 4.089  | 0.00 | 0.00 |
| ATOM | 920 | H3'  | RU | 29 | -4.201 | -14.599 | 3.116  | 0.00 | 0.00 |
| ATOM | 921 | C2'  | RU | 29 | -2.842 | -15.336 | 4.546  | 0.00 | 0.00 |
| ATOM | 922 | 1H2' | RU | 29 | -2.170 | -14.580 | 4.225  | 0.00 | 0.00 |
| ATOM | 923 | O2'  | RU | 29 | -2.769 | -15.504 | 5.918  | 0.00 | 0.00 |
| ATOM | 924 | 2HO' | RU | 29 | -3.048 | -14.918 | 6.270  | 0.00 | 0.00 |
| ATOM | 925 | O3'  | RU | 29 | -4.955 | -14.214 | 4.980  | 0.00 | 0.00 |
| ATOM | 926 | P    | RG | 30 | -4.913 | -12.662 | 4.883  | 0.00 | 0.00 |
| ATOM | 927 | O1P  | RG | 30 | -5.027 | -12.307 | 3.503  | 0.00 | 0.00 |
| ATOM | 928 | O2P  | RG | 30 | -5.877 | -12.142 | 5.820  | 0.00 | 0.00 |
| ATOM | 929 | O5'  | RG | 30 | -3.486 | -12.268 | 5.358  | 0.00 | 0.00 |
| ATOM | 930 | C5'  | RG | 30 | -3.155 | -12.174 | 6.701  | 0.00 | 0.00 |
| ATOM | 931 | 1H5' | RG | 30 | -3.375 | -13.095 | 7.180  | 0.00 | 0.00 |
| ATOM | 932 | 2H5' | RG | 30 | -3.730 | -11.402 | 7.158  | 0.00 | 0.00 |
| ATOM | 933 | C4'  | RG | 30 | -1.698 | -11.854 | 6.891  | 0.00 | 0.00 |
| ATOM | 934 | H4'  | RG | 30 | -1.510 | -11.758 | 7.932  | 0.00 | 0.00 |
| ATOM | 935 | O4'  | RG | 30 | -0.875 | -12.876 | 6.380  | 0.00 | 0.00 |
| ATOM | 936 | C1'  | RG | 30 | 0.322  | -12.307 | 5.911  | 0.00 | 0.00 |
| ATOM | 937 | H1'  | RG | 30 | 1.158  | -12.684 | 6.461  | 0.00 | 0.00 |
| ATOM | 938 | N9   | RG | 30 | 0.535  | -12.619 | 4.498  | 0.00 | 0.00 |
| ATOM | 939 | C8   | RG | 30 | -0.354 | -12.624 | 3.470  | 0.00 | 0.00 |
| ATOM | 940 | H8   | RG | 30 | -1.395 | -12.458 | 3.621  | 0.00 | 0.00 |
| ATOM | 941 | N7   | RG | 30 | 0.169  | -12.839 | 2.309  | 0.00 | 0.00 |
| ATOM | 942 | C5   | RG | 30 | 1.524  | -12.966 | 2.582  | 0.00 | 0.00 |
| ATOM | 943 | C6   | RG | 30 | 2.655  | -13.158 | 1.732  | 0.00 | 0.00 |
| ATOM | 944 | O6   | RG | 30 | 2.698  | -13.278 | 0.523  | 0.00 | 0.00 |
| ATOM | 945 | N1   | RG | 30 | 3.844  | -13.194 | 2.404  | 0.00 | 0.00 |



|      |      |      |    |    |        |         |        |      |      |
|------|------|------|----|----|--------|---------|--------|------|------|
| ATOM | 946  | H1   | RG | 30 | 4.676  | -13.296 | 1.870  | 0.00 | 0.00 |
| ATOM | 947  | C2   | RG | 30 | 3.953  | -13.071 | 3.730  | 0.00 | 0.00 |
| ATOM | 948  | N2   | RG | 30 | 5.136  | -13.121 | 4.231  | 0.00 | 0.00 |
| ATOM | 949  | H21  | RG | 30 | 5.920  | -13.212 | 3.639  | 0.00 | 0.00 |
| ATOM | 950  | H22  | RG | 30 | 5.226  | -13.027 | 5.205  | 0.00 | 0.00 |
| ATOM | 951  | N3   | RG | 30 | 2.945  | -12.897 | 4.557  | 0.00 | 0.00 |
| ATOM | 952  | C4   | RG | 30 | 1.747  | -12.845 | 3.922  | 0.00 | 0.00 |
| ATOM | 953  | C3'  | RG | 30 | -1.263 | -10.580 | 6.229  | 0.00 | 0.00 |
| ATOM | 954  | H3'  | RG | 30 | -1.678 | -10.544 | 5.248  | 0.00 | 0.00 |
| ATOM | 955  | C2'  | RG | 30 | 0.226  | -10.816 | 6.132  | 0.00 | 0.00 |
| ATOM | 956  | 1H2' | RG | 30 | 0.645  | -10.282 | 5.316  | 0.00 | 0.00 |
| ATOM | 957  | O2'  | RG | 30 | 0.885  | -10.502 | 7.312  | 0.00 | 0.00 |
| ATOM | 958  | 2HO' | RG | 30 | 0.799  | -9.737  | 7.482  | 0.00 | 0.00 |
| ATOM | 959  | O3'  | RG | 30 | -1.586 | -9.430  | 6.958  | 0.00 | 0.00 |
| ATOM | 960  | P    | RA | 31 | -1.720 | -8.037  | 6.288  | 0.00 | 0.00 |
| ATOM | 961  | O1P  | RA | 31 | -1.132 | -7.080  | 7.166  | 0.00 | 0.00 |
| ATOM | 962  | O2P  | RA | 31 | -1.256 | -8.111  | 4.937  | 0.00 | 0.00 |
| ATOM | 963  | O5'  | RA | 31 | -3.239 | -7.765  | 6.290  | 0.00 | 0.00 |
| ATOM | 964  | C5'  | RA | 31 | -4.102 | -8.466  | 5.490  | 0.00 | 0.00 |
| ATOM | 965  | 1H5' | RA | 31 | -3.974 | -9.493  | 5.667  | 0.00 | 0.00 |
| ATOM | 966  | 2H5' | RA | 31 | -3.900 | -8.275  | 4.485  | 0.00 | 0.00 |
| ATOM | 967  | C4'  | RA | 31 | -5.521 | -8.090  | 5.753  | 0.00 | 0.00 |
| ATOM | 968  | H4'  | RA | 31 | -6.139 | -8.670  | 5.125  | 0.00 | 0.00 |
| ATOM | 969  | O4'  | RA | 31 | -5.860 | -8.355  | 7.063  | 0.00 | 0.00 |
| ATOM | 970  | C1'  | RA | 31 | -6.678 | -7.344  | 7.529  | 0.00 | 0.00 |
| ATOM | 971  | H1'  | RA | 31 | -7.571 | -7.742  | 7.908  | 0.00 | 0.00 |
| ATOM | 972  | N9   | RA | 31 | -6.020 | -6.626  | 8.589  | 0.00 | 0.00 |
| ATOM | 973  | C8   | RA | 31 | -4.742 | -6.581  | 8.918  | 0.00 | 0.00 |
| ATOM | 974  | H8   | RA | 31 | -4.022 | -7.057  | 8.362  | 0.00 | 0.00 |
| ATOM | 975  | N7   | RA | 31 | -4.480 | -5.930  | 9.970  | 0.00 | 0.00 |
| ATOM | 976  | C5   | RA | 31 | -5.690 | -5.492  | 10.352 | 0.00 | 0.00 |
| ATOM | 977  | C6   | RA | 31 | -6.155 | -4.744  | 11.387 | 0.00 | 0.00 |
| ATOM | 978  | N6   | RA | 31 | -5.454 | -4.261  | 12.327 | 0.00 | 0.00 |
| ATOM | 979  | H61  | RA | 31 | -5.886 | -3.747  | 12.995 | 0.00 | 0.00 |
| ATOM | 980  | H62  | RA | 31 | -4.508 | -4.386  | 12.317 | 0.00 | 0.00 |
| ATOM | 981  | N1   | RA | 31 | -7.396 | -4.481  | 11.490 | 0.00 | 0.00 |
| ATOM | 982  | C2   | RA | 31 | -8.188 | -4.945  | 10.596 | 0.00 | 0.00 |
| ATOM | 983  | H2   | RA | 31 | -9.182 | -4.719  | 10.708 | 0.00 | 0.00 |
| ATOM | 984  | N3   | RA | 31 | -7.909 | -5.661  | 9.579  | 0.00 | 0.00 |
| ATOM | 985  | C4   | RA | 31 | -6.626 | -5.903  | 9.509  | 0.00 | 0.00 |
| ATOM | 986  | C3'  | RA | 31 | -5.847 | -6.660  | 5.476  | 0.00 | 0.00 |
| ATOM | 987  | H3'  | RA | 31 | -5.050 | -6.057  | 5.800  | 0.00 | 0.00 |
| ATOM | 988  | C2'  | RA | 31 | -7.004 | -6.457  | 6.370  | 0.00 | 0.00 |
| ATOM | 989  | 1H2' | RA | 31 | -7.075 | -5.449  | 6.657  | 0.00 | 0.00 |
| ATOM | 990  | O2'  | RA | 31 | -8.191 | -6.881  | 5.801  | 0.00 | 0.00 |
| ATOM | 991  | 2HO' | RA | 31 | -8.195 | -6.797  | 5.080  | 0.00 | 0.00 |
| ATOM | 992  | O3'  | RA | 31 | -6.196 | -6.415  | 4.159  | 0.00 | 0.00 |
| ATOM | 993  | P    | RG | 32 | -5.795 | -5.106  | 3.449  | 0.00 | 0.00 |
| ATOM | 994  | O1P  | RG | 32 | -4.359 | -5.011  | 3.491  | 0.00 | 0.00 |
| ATOM | 995  | O2P  | RG | 32 | -6.460 | -5.101  | 2.180  | 0.00 | 0.00 |
| ATOM | 996  | O5'  | RG | 32 | -6.365 | -3.939  | 4.290  | 0.00 | 0.00 |
| ATOM | 997  | C5'  | RG | 32 | -7.724 | -3.632  | 4.322  | 0.00 | 0.00 |
| ATOM | 998  | 1H5' | RG | 32 | -8.285 | -4.506  | 4.513  | 0.00 | 0.00 |
| ATOM | 999  | 2H5' | RG | 32 | -8.025 | -3.239  | 3.388  | 0.00 | 0.00 |
| ATOM | 1000 | C4'  | RG | 32 | -8.029 | -2.627  | 5.382  | 0.00 | 0.00 |
| ATOM | 1001 | H4'  | RG | 32 | -9.079 | -2.432  | 5.353  | 0.00 | 0.00 |
| ATOM | 1002 | O4'  | RG | 32 | -7.682 | -3.090  | 6.648  | 0.00 | 0.00 |
| ATOM | 1003 | C1'  | RG | 32 | -7.426 | -2.009  | 7.476  | 0.00 | 0.00 |
| ATOM | 1004 | H1'  | RG | 32 | -8.263 | -1.878  | 8.100  | 0.00 | 0.00 |
| ATOM | 1005 | N9   | RG | 32 | -6.235 | -2.147  | 8.316  | 0.00 | 0.00 |
| ATOM | 1006 | C8   | RG | 32 | -6.073 | -1.642  | 9.538  | 0.00 | 0.00 |
| ATOM | 1007 | H8   | RG | 32 | -6.842 | -1.120  | 10.024 | 0.00 | 0.00 |
| ATOM | 1008 | N7   | RG | 32 | -4.914 | -1.834  | 10.053 | 0.00 | 0.00 |
| ATOM | 1009 | C5   | RG | 32 | -4.249 | -2.545  | 9.097  | 0.00 | 0.00 |
| ATOM | 1010 | C6   | RG | 32 | -2.935 | -3.074  | 9.077  | 0.00 | 0.00 |
| ATOM | 1011 | O6   | RG | 32 | -2.070 | -3.012  | 9.907  | 0.00 | 0.00 |
| ATOM | 1012 | N1   | RG | 32 | -2.635 | -3.729  | 7.949  | 0.00 | 0.00 |
| ATOM | 1013 | H1   | RG | 32 | -1.745 | -4.133  | 7.872  | 0.00 | 0.00 |

|      |      |      |    |    |         |        |        |      |      |
|------|------|------|----|----|---------|--------|--------|------|------|
| ATOM | 1014 | C2   | RG | 32 | -3.468  | -3.819 | 6.932  | 0.00 | 0.00 |
| ATOM | 1015 | N2   | RG | 32 | -3.017  | -4.409 | 5.906  | 0.00 | 0.00 |
| ATOM | 1016 | H21  | RG | 32 | -2.155  | -4.872 | 5.931  | 0.00 | 0.00 |
| ATOM | 1017 | H22  | RG | 32 | -3.626  | -4.528 | 5.150  | 0.00 | 0.00 |
| ATOM | 1018 | N3   | RG | 32 | -4.677  | -3.324 | 6.892  | 0.00 | 0.00 |
| ATOM | 1019 | C4   | RG | 32 | -5.037  | -2.715 | 8.018  | 0.00 | 0.00 |
| ATOM | 1020 | C3'  | RG | 32 | -7.312  | -1.329 | 5.217  | 0.00 | 0.00 |
| ATOM | 1021 | H3'  | RG | 32 | -6.310  | -1.520 | 4.948  | 0.00 | 0.00 |
| ATOM | 1022 | C2'  | RG | 32 | -7.320  | -0.800 | 6.609  | 0.00 | 0.00 |
| ATOM | 1023 | 1H2' | RG | 32 | -6.425  | -0.290 | 6.796  | 0.00 | 0.00 |
| ATOM | 1024 | O2'  | RG | 32 | -8.398  | 0.001  | 6.843  | 0.00 | 0.00 |
| ATOM | 1025 | 2HO' | RG | 32 | -8.411  | 0.639  | 6.196  | 0.00 | 0.00 |
| ATOM | 1026 | O3'  | RG | 32 | -7.940  | -0.509 | 4.285  | 0.00 | 0.00 |
| ATOM | 1027 | P    | RG | 33 | -7.350  | 0.853  | 3.909  | 0.00 | 0.00 |
| ATOM | 1028 | O1P  | RG | 33 | -7.689  | 1.763  | 4.930  | 0.00 | 0.00 |
| ATOM | 1029 | O2P  | RG | 33 | -5.989  | 0.659  | 3.584  | 0.00 | 0.00 |
| ATOM | 1030 | O5'  | RG | 33 | -8.102  | 1.271  | 2.617  | 0.00 | 0.00 |
| ATOM | 1031 | C5'  | RG | 33 | -9.442  | 1.602  | 2.612  | 0.00 | 0.00 |
| ATOM | 1032 | 1H5' | RG | 33 | -9.636  | 2.308  | 3.370  | 0.00 | 0.00 |
| ATOM | 1033 | 2H5' | RG | 33 | -10.008 | 0.730  | 2.806  | 0.00 | 0.00 |
| ATOM | 1034 | C4'  | RG | 33 | -9.886  | 2.196  | 1.307  | 0.00 | 0.00 |
| ATOM | 1035 | H4'  | RG | 33 | -10.944 | 2.285  | 1.331  | 0.00 | 0.00 |
| ATOM | 1036 | O4'  | RG | 33 | -9.358  | 3.482  | 1.131  | 0.00 | 0.00 |
| ATOM | 1037 | C1'  | RG | 33 | -8.942  | 3.648  | -0.203 | 0.00 | 0.00 |
| ATOM | 1038 | H1'  | RG | 33 | -9.369  | 4.539  | -0.624 | 0.00 | 0.00 |
| ATOM | 1039 | N9   | RG | 33 | -7.480  | 3.771  | -0.278 | 0.00 | 0.00 |
| ATOM | 1040 | C8   | RG | 33 | -6.558  | 3.553  | 0.692  | 0.00 | 0.00 |
| ATOM | 1041 | H8   | RG | 33 | -6.823  | 3.187  | 1.654  | 0.00 | 0.00 |
| ATOM | 1042 | N7   | RG | 33 | -5.342  | 3.831  | 0.353  | 0.00 | 0.00 |
| ATOM | 1043 | C5   | RG | 33 | -5.463  | 4.278  | -0.949 | 0.00 | 0.00 |
| ATOM | 1044 | C6   | RG | 33 | -4.491  | 4.769  | -1.870 | 0.00 | 0.00 |
| ATOM | 1045 | O6   | RG | 33 | -3.295  | 4.922  | -1.716 | 0.00 | 0.00 |
| ATOM | 1046 | N1   | RG | 33 | -5.016  | 5.110  | -3.082 | 0.00 | 0.00 |
| ATOM | 1047 | H1   | RG | 33 | -4.396  | 5.502  | -3.751 | 0.00 | 0.00 |
| ATOM | 1048 | C2   | RG | 33 | -6.320  | 5.020  | -3.378 | 0.00 | 0.00 |
| ATOM | 1049 | N2   | RG | 33 | -6.673  | 5.362  | -4.567 | 0.00 | 0.00 |
| ATOM | 1050 | H21  | RG | 33 | -5.993  | 5.663  | -5.223 | 0.00 | 0.00 |
| ATOM | 1051 | H22  | RG | 33 | -7.629  | 5.297  | -4.804 | 0.00 | 0.00 |
| ATOM | 1052 | N3   | RG | 33 | -7.259  | 4.586  | -2.559 | 0.00 | 0.00 |
| ATOM | 1053 | C4   | RG | 33 | -6.768  | 4.228  | -1.349 | 0.00 | 0.00 |
| ATOM | 1054 | C3'  | RG | 33 | -9.520  | 1.380  | 0.094  | 0.00 | 0.00 |
| ATOM | 1055 | H3'  | RG | 33 | -8.551  | 0.959  | 0.226  | 0.00 | 0.00 |
| ATOM | 1056 | C2'  | RG | 33 | -9.445  | 2.448  | -0.969 | 0.00 | 0.00 |
| ATOM | 1057 | 1H2' | RG | 33 | -8.770  | 2.166  | -1.741 | 0.00 | 0.00 |
| ATOM | 1058 | O2'  | RG | 33 | -10.693 | 2.757  | -1.499 | 0.00 | 0.00 |
| ATOM | 1059 | 2HO' | RG | 33 | -10.979 | 2.296  | -1.752 | 0.00 | 0.00 |
| ATOM | 1060 | O3'  | RG | 33 | -10.470 | 0.391  | -0.191 | 0.00 | 0.00 |
| ATOM | 1061 | P    | RU | 34 | -10.100 | -0.874 | -1.024 | 0.00 | 0.00 |
| ATOM | 1062 | O1P  | RU | 34 | -8.943  | -1.479 | -0.413 | 0.00 | 0.00 |
| ATOM | 1063 | O2P  | RU | 34 | -11.298 | -1.659 | -1.173 | 0.00 | 0.00 |
| ATOM | 1064 | O5'  | RU | 34 | -9.711  | -0.323 | -2.434 | 0.00 | 0.00 |
| ATOM | 1065 | C5'  | RU | 34 | -9.253  | -0.586 | -3.312 | 0.00 | 0.00 |
| ATOM | 1066 | 1H5' | RU | 34 | -9.648  | -1.050 | -3.434 | 0.00 | 0.00 |
| ATOM | 1067 | 2H5' | RU | 34 | -8.785  | -0.887 | -3.014 | 0.00 | 0.00 |
| ATOM | 1068 | C4'  | RU | 34 | -8.882  | 0.184  | -4.520 | 0.00 | 0.00 |
| ATOM | 1069 | H4'  | RU | 34 | -9.755  | 0.354  | -5.093 | 0.00 | 0.00 |
| ATOM | 1070 | O4'  | RU | 34 | -8.284  | 1.406  | -4.185 | 0.00 | 0.00 |
| ATOM | 1071 | C1'  | RU | 34 | -7.242  | 1.686  | -5.086 | 0.00 | 0.00 |
| ATOM | 1072 | H1'  | RU | 34 | -7.415  | 2.632  | -5.546 | 0.00 | 0.00 |
| ATOM | 1073 | N1   | RU | 34 | -5.914  | 1.729  | -4.431 | 0.00 | 0.00 |
| ATOM | 1074 | C6   | RU | 34 | -5.709  | 1.239  | -3.172 | 0.00 | 0.00 |
| ATOM | 1075 | H6   | RU | 34 | -6.517  | 0.794  | -2.644 | 0.00 | 0.00 |
| ATOM | 1076 | C5   | RU | 34 | -4.496  | 1.316  | -2.591 | 0.00 | 0.00 |
| ATOM | 1077 | H5   | RU | 34 | -4.348  | 0.931  | -1.611 | 0.00 | 0.00 |
| ATOM | 1078 | C4   | RU | 34 | -3.381  | 1.910  | -3.252 | 0.00 | 0.00 |
| ATOM | 1079 | O4   | RU | 34 | -2.269  | 2.022  | -2.788 | 0.00 | 0.00 |
| ATOM | 1080 | N3   | RU | 34 | -3.659  | 2.388  | -4.490 | 0.00 | 0.00 |
| ATOM | 1081 | H3   | RU | 34 | -2.915  | 2.822  | -4.977 | 0.00 | 0.00 |

|      |      |      |    |    |        |        |         |      |      |
|------|------|------|----|----|--------|--------|---------|------|------|
| ATOM | 1082 | C2   | RU | 34 | -4.867 | 2.319  | -5.124  | 0.00 | 0.00 |
| ATOM | 1083 | O2   | RU | 34 | -4.977 | 2.771  | -6.244  | 0.00 | 0.00 |
| ATOM | 1084 | C3'  | RU | 34 | -7.905 | -0.537 | -5.383  | 0.00 | 0.00 |
| ATOM | 1085 | H3'  | RU | 34 | -7.147 | -0.956 | -4.769  | 0.00 | 0.00 |
| ATOM | 1086 | C2'  | RU | 34 | -7.321 | 0.610  | -6.142  | 0.00 | 0.00 |
| ATOM | 1087 | 1H2' | RU | 34 | -6.363 | 0.371  | -6.522  | 0.00 | 0.00 |
| ATOM | 1088 | O2'  | RU | 34 | -8.166 | 1.028  | -7.161  | 0.00 | 0.00 |
| ATOM | 1089 | 2HO' | RU | 34 | -8.437 | 0.541  | -7.506  | 0.00 | 0.00 |
| ATOM | 1090 | O3'  | RU | 34 | -8.499 | -1.504 | -6.204  | 0.00 | 0.00 |
| ATOM | 1091 | P    | RG | 35 | -7.694 | -2.722 | -6.736  | 0.00 | 0.00 |
| ATOM | 1092 | O1P  | RG | 35 | -6.973 | -3.294 | -5.627  | 0.00 | 0.00 |
| ATOM | 1093 | O2P  | RG | 35 | -8.609 | -3.556 | -7.490  | 0.00 | 0.00 |
| ATOM | 1094 | O5'  | RG | 35 | -6.641 | -2.138 | -7.723  | 0.00 | 0.00 |
| ATOM | 1095 | C5'  | RG | 35 | -7.005 | -1.704 | -8.990  | 0.00 | 0.00 |
| ATOM | 1096 | 1H5' | RG | 35 | -7.812 | -1.018 | -8.920  | 0.00 | 0.00 |
| ATOM | 1097 | 2H5' | RG | 35 | -7.328 | -2.536 | -9.574  | 0.00 | 0.00 |
| ATOM | 1098 | C4'  | RG | 35 | -5.852 | -1.039 | -9.700  | 0.00 | 0.00 |
| ATOM | 1099 | H4'  | RG | 35 | -6.204 | -0.695 | -10.649 | 0.00 | 0.00 |
| ATOM | 1100 | O4'  | RG | 35 | -5.353 | 0.066  | -8.983  | 0.00 | 0.00 |
| ATOM | 1101 | C1'  | RG | 35 | -3.960 | 0.156  | -9.198  | 0.00 | 0.00 |
| ATOM | 1102 | H1'  | RG | 35 | -3.705 | 1.109  | -9.619  | 0.00 | 0.00 |
| ATOM | 1103 | N9   | RG | 35 | -3.209 | 0.009  | -7.946  | 0.00 | 0.00 |
| ATOM | 1104 | C8   | RG | 35 | -3.570 | -0.602 | -6.784  | 0.00 | 0.00 |
| ATOM | 1105 | H8   | RG | 35 | -4.507 | -1.098 | -6.673  | 0.00 | 0.00 |
| ATOM | 1106 | N7   | RG | 35 | -2.692 | -0.508 | -5.836  | 0.00 | 0.00 |
| ATOM | 1107 | C5   | RG | 35 | -1.648 | 0.199  | -6.420  | 0.00 | 0.00 |
| ATOM | 1108 | C6   | RG | 35 | -0.382 | 0.628  | -5.912  | 0.00 | 0.00 |
| ATOM | 1109 | O6   | RG | 35 | 0.081  | 0.510  | -4.791  | 0.00 | 0.00 |
| ATOM | 1110 | N1   | RG | 35 | 0.402  | 1.250  | -6.846  | 0.00 | 0.00 |
| ATOM | 1111 | H1   | RG | 35 | 1.301  | 1.568  | -6.563  | 0.00 | 0.00 |
| ATOM | 1112 | C2   | RG | 35 | 0.014  | 1.468  | -8.109  | 0.00 | 0.00 |
| ATOM | 1113 | N2   | RG | 35 | 0.854  | 2.061  | -8.882  | 0.00 | 0.00 |
| ATOM | 1114 | H21  | RG | 35 | 1.741  | 2.343  | -8.535  | 0.00 | 0.00 |
| ATOM | 1115 | H22  | RG | 35 | 0.582  | 2.232  | -9.810  | 0.00 | 0.00 |
| ATOM | 1116 | N3   | RG | 35 | -1.155 | 1.122  | -8.617  | 0.00 | 0.00 |
| ATOM | 1117 | C4   | RG | 35 | -1.949 | 0.485  | -7.721  | 0.00 | 0.00 |
| ATOM | 1118 | C3'  | RG | 35 | -4.680 | -1.951 | -9.954  | 0.00 | 0.00 |
| ATOM | 1119 | H3'  | RG | 35 | -4.462 | -2.500 | -9.066  | 0.00 | 0.00 |
| ATOM | 1120 | C2'  | RG | 35 | -3.590 | -0.928 | -10.185 | 0.00 | 0.00 |
| ATOM | 1121 | 1H2' | RG | 35 | -2.625 | -1.336 | -9.973  | 0.00 | 0.00 |
| ATOM | 1122 | O2'  | RG | 35 | -3.624 | -0.384 | -11.467 | 0.00 | 0.00 |
| ATOM | 1123 | 2HO' | RG | 35 | -3.483 | -0.734 | -11.894 | 0.00 | 0.00 |
| ATOM | 1124 | O3'  | RG | 35 | -4.880 | -2.805 | -11.045 | 0.00 | 0.00 |
| ATOM | 1125 | P    | RC | 36 | -4.103 | -4.146 | -11.182 | 0.00 | 0.00 |
| ATOM | 1126 | O1P  | RC | 36 | -4.164 | -4.828 | -9.918  | 0.00 | 0.00 |
| ATOM | 1127 | O2P  | RC | 36 | -4.604 | -4.815 | -12.357 | 0.00 | 0.00 |
| ATOM | 1128 | O5'  | RC | 36 | -2.614 | -3.754 | -11.444 | 0.00 | 0.00 |
| ATOM | 1129 | C5'  | RC | 36 | -2.189 | -3.275 | -12.679 | 0.00 | 0.00 |
| ATOM | 1130 | 1H5' | RC | 36 | -2.828 | -2.483 | -12.993 | 0.00 | 0.00 |
| ATOM | 1131 | 2H5' | RC | 36 | -2.245 | -4.057 | -13.403 | 0.00 | 0.00 |
| ATOM | 1132 | C4'  | RC | 36 | -0.772 | -2.753 | -12.630 | 0.00 | 0.00 |
| ATOM | 1133 | H4'  | RC | 36 | -0.535 | -2.362 | -13.597 | 0.00 | 0.00 |
| ATOM | 1134 | O4'  | RC | 36 | -0.620 | -1.723 | -11.676 | 0.00 | 0.00 |
| ATOM | 1135 | C1'  | RC | 36 | 0.696  | -1.758 | -11.166 | 0.00 | 0.00 |
| ATOM | 1136 | H1'  | RC | 36 | 1.189  | -0.835 | -11.395 | 0.00 | 0.00 |
| ATOM | 1137 | N1   | RC | 36 | 0.739  | -1.955 | -9.703  | 0.00 | 0.00 |
| ATOM | 1138 | C6   | RC | 36 | -0.220 | -2.641 | -9.038  | 0.00 | 0.00 |
| ATOM | 1139 | H6   | RC | 36 | -1.046 | -3.044 | -9.568  | 0.00 | 0.00 |
| ATOM | 1140 | C5   | RC | 36 | -0.131 | -2.807 | -7.712  | 0.00 | 0.00 |
| ATOM | 1141 | H5   | RC | 36 | -0.885 | -3.337 | -7.189  | 0.00 | 0.00 |
| ATOM | 1142 | C4   | RC | 36 | 0.986  | -2.267 | -7.066  | 0.00 | 0.00 |
| ATOM | 1143 | N4   | RC | 36 | 1.117  | -2.383 | -5.796  | 0.00 | 0.00 |
| ATOM | 1144 | H41  | RC | 36 | 1.893  | -1.953 | -5.367  | 0.00 | 0.00 |
| ATOM | 1145 | H42  | RC | 36 | 0.428  | -2.854 | -5.281  | 0.00 | 0.00 |
| ATOM | 1146 | N3   | RC | 36 | 1.924  | -1.613 | -7.681  | 0.00 | 0.00 |
| ATOM | 1147 | C2   | RC | 36 | 1.825  | -1.457 | -9.007  | 0.00 | 0.00 |
| ATOM | 1148 | O2   | RC | 36 | 2.727  | -0.878 | -9.568  | 0.00 | 0.00 |
| ATOM | 1149 | C3'  | RC | 36 | 0.269  | -3.791 | -12.295 | 0.00 | 0.00 |

|      |      |      |    |    |        |        |         |      |      |
|------|------|------|----|----|--------|--------|---------|------|------|
| ATOM | 1150 | H3'  | RC | 36 | -0.062 | -4.356 | -11.451 | 0.00 | 0.00 |
| ATOM | 1151 | C2'  | RC | 36 | 1.406  | -2.884 | -11.884 | 0.00 | 0.00 |
| ATOM | 1152 | 1H2' | RC | 36 | 2.086  | -3.389 | -11.239 | 0.00 | 0.00 |
| ATOM | 1153 | O2'  | RC | 36 | 2.077  | -2.342 | -12.977 | 0.00 | 0.00 |
| ATOM | 1154 | 2HO' | RC | 36 | 2.389  | -2.739 | -13.326 | 0.00 | 0.00 |
| ATOM | 1155 | O3'  | RC | 36 | 0.588  | -4.628 | -13.374 | 0.00 | 0.00 |
| ATOM | 1156 | P    | RA | 37 | 1.257  | -6.025 | -13.155 | 0.00 | 0.00 |
| ATOM | 1157 | O1P  | RA | 37 | 0.549  | -6.698 | -12.100 | 0.00 | 0.00 |
| ATOM | 1158 | O2P  | RA | 37 | 1.360  | -6.667 | -14.447 | 0.00 | 0.00 |
| ATOM | 1159 | O5'  | RA | 37 | 2.701  | -5.735 | -12.633 | 0.00 | 0.00 |
| ATOM | 1160 | C5'  | RA | 37 | 3.713  | -5.299 | -13.479 | 0.00 | 0.00 |
| ATOM | 1161 | 1H5' | RA | 37 | 3.372  | -4.463 | -14.040 | 0.00 | 0.00 |
| ATOM | 1162 | 2H5' | RA | 37 | 3.976  | -6.075 | -14.160 | 0.00 | 0.00 |
| ATOM | 1163 | C4'  | RA | 37 | 4.953  | -4.895 | -12.719 | 0.00 | 0.00 |
| ATOM | 1164 | H4'  | RA | 37 | 5.667  | -4.530 | -13.425 | 0.00 | 0.00 |
| ATOM | 1165 | O4'  | RA | 37 | 4.689  | -3.877 | -11.785 | 0.00 | 0.00 |
| ATOM | 1166 | C1'  | RA | 37 | 5.520  | -4.062 | -10.665 | 0.00 | 0.00 |
| ATOM | 1167 | H1'  | RA | 37 | 6.107  | -3.185 | -10.483 | 0.00 | 0.00 |
| ATOM | 1168 | N9   | RA | 37 | 4.726  | -4.340 | -9.467  | 0.00 | 0.00 |
| ATOM | 1169 | C8   | RA | 37 | 3.486  | -4.882 | -9.353  | 0.00 | 0.00 |
| ATOM | 1170 | H8   | RA | 37 | 2.924  | -5.210 | -10.191 | 0.00 | 0.00 |
| ATOM | 1171 | N7   | RA | 37 | 3.042  | -4.950 | -8.143  | 0.00 | 0.00 |
| ATOM | 1172 | C5   | RA | 37 | 4.093  | -4.445 | -7.392  | 0.00 | 0.00 |
| ATOM | 1173 | C6   | RA | 37 | 4.330  | -4.229 | -6.029  | 0.00 | 0.00 |
| ATOM | 1174 | N6   | RA | 37 | 3.485  | -4.451 | -5.071  | 0.00 | 0.00 |
| ATOM | 1175 | H61  | RA | 37 | 3.760  | -4.249 | -4.149  | 0.00 | 0.00 |
| ATOM | 1176 | H62  | RA | 37 | 2.590  | -4.784 | -5.290  | 0.00 | 0.00 |
| ATOM | 1177 | N1   | RA | 37 | 5.490  | -3.768 | -5.606  | 0.00 | 0.00 |
| ATOM | 1178 | C2   | RA | 37 | 6.408  | -3.506 | -6.499  | 0.00 | 0.00 |
| ATOM | 1179 | H2   | RA | 37 | 7.326  | -3.134 | -6.124  | 0.00 | 0.00 |
| ATOM | 1180 | N3   | RA | 37 | 6.330  | -3.632 | -7.803  | 0.00 | 0.00 |
| ATOM | 1181 | C4   | RA | 37 | 5.132  | -4.103 | -8.190  | 0.00 | 0.00 |
| ATOM | 1182 | C3'  | RA | 37 | 5.611  | -6.018 | -11.952 | 0.00 | 0.00 |
| ATOM | 1183 | H3'  | RA | 37 | 4.861  | -6.563 | -11.424 | 0.00 | 0.00 |
| ATOM | 1184 | C2'  | RA | 37 | 6.443  | -5.221 | -10.979 | 0.00 | 0.00 |
| ATOM | 1185 | 1H2' | RA | 37 | 6.670  | -5.791 | -10.105 | 0.00 | 0.00 |
| ATOM | 1186 | O2'  | RA | 37 | 7.609  | -4.715 | -11.550 | 0.00 | 0.00 |
| ATOM | 1187 | 2HO' | RA | 37 | 8.012  | -5.067 | -11.733 | 0.00 | 0.00 |
| ATOM | 1188 | O3'  | RA | 37 | 6.379  | -6.860 | -12.761 | 0.00 | 0.00 |
| ATOM | 1189 | P    | RC | 38 | 6.667  | -8.336 | -12.351 | 0.00 | 0.00 |
| ATOM | 1190 | O1P  | RC | 38 | 5.412  | -8.944 | -11.972 | 0.00 | 0.00 |
| ATOM | 1191 | O2P  | RC | 38 | 7.441  | -8.938 | -13.420 | 0.00 | 0.00 |
| ATOM | 1192 | O5'  | RC | 38 | 7.563  | -8.245 | -11.072 | 0.00 | 0.00 |
| ATOM | 1193 | C5'  | RC | 38 | 8.908  | -7.887 | -11.141 | 0.00 | 0.00 |
| ATOM | 1194 | 1H5' | RC | 38 | 9.008  | -6.973 | -11.675 | 0.00 | 0.00 |
| ATOM | 1195 | 2H5' | RC | 38 | 9.451  | -8.642 | -11.662 | 0.00 | 0.00 |
| ATOM | 1196 | C4'  | RC | 38 | 9.518  | -7.722 | -9.766  | 0.00 | 0.00 |
| ATOM | 1197 | H4'  | RC | 38 | 10.537 | -7.420 | -9.888  | 0.00 | 0.00 |
| ATOM | 1198 | O4'  | RC | 38 | 8.860  | -6.737 | -9.008  | 0.00 | 0.00 |
| ATOM | 1199 | C1'  | RC | 38 | 8.931  | -7.086 | -7.644  | 0.00 | 0.00 |
| ATOM | 1200 | H1'  | RC | 38 | 9.484  | -6.337 | -7.108  | 0.00 | 0.00 |
| ATOM | 1201 | N1   | RC | 38 | 7.596  | -7.217 | -7.031  | 0.00 | 0.00 |
| ATOM | 1202 | C6   | RC | 38 | 6.507  | -7.592 | -7.742  | 0.00 | 0.00 |
| ATOM | 1203 | H6   | RC | 38 | 6.598  | -7.763 | -8.782  | 0.00 | 0.00 |
| ATOM | 1204 | C5   | RC | 38 | 5.325  | -7.750 | -7.140  | 0.00 | 0.00 |
| ATOM | 1205 | H5   | RC | 38 | 4.471  | -8.033 | -7.699  | 0.00 | 0.00 |
| ATOM | 1206 | C4   | RC | 38 | 5.273  | -7.529 | -5.767  | 0.00 | 0.00 |
| ATOM | 1207 | N4   | RC | 38 | 4.171  | -7.661 | -5.132  | 0.00 | 0.00 |
| ATOM | 1208 | H41  | RC | 38 | 4.165  | -7.416 | -4.183  | 0.00 | 0.00 |
| ATOM | 1209 | H42  | RC | 38 | 3.356  | -7.866 | -5.628  | 0.00 | 0.00 |
| ATOM | 1210 | N3   | RC | 38 | 6.303  | -7.188 | -5.057  | 0.00 | 0.00 |
| ATOM | 1211 | C2   | RC | 38 | 7.478  | -7.031 | -5.670  | 0.00 | 0.00 |
| ATOM | 1212 | O2   | RC | 38 | 8.430  | -6.729 | -4.983  | 0.00 | 0.00 |
| ATOM | 1213 | C3'  | RC | 38 | 9.516  | -8.984 | -8.941  | 0.00 | 0.00 |
| ATOM | 1214 | H3'  | RC | 38 | 8.557  | -9.452 | -9.011  | 0.00 | 0.00 |
| ATOM | 1215 | C2'  | RC | 38 | 9.689  | -8.390 | -7.555  | 0.00 | 0.00 |
| ATOM | 1216 | 1H2' | RC | 38 | 9.272  | -9.039 | -6.815  | 0.00 | 0.00 |
| ATOM | 1217 | O2'  | RC | 38 | 11.022 | -8.106 | -7.253  | 0.00 | 0.00 |

|      |      |      |    |    |        |         |        |      |      |
|------|------|------|----|----|--------|---------|--------|------|------|
| ATOM | 1218 | 2HO' | RC | 38 | 11.440 | -8.863  | -7.184 | 0.00 | 0.00 |
| ATOM | 1219 | O3'  | RC | 38 | 10.527 | -9.879  | -9.313 | 0.00 | 0.00 |
| ATOM | 1220 | P    | RA | 39 | 10.642 | -11.295 | -8.672 | 0.00 | 0.00 |
| ATOM | 1221 | O1P  | RA | 39 | 9.332  | -11.861 | -8.605 | 0.00 | 0.00 |
| ATOM | 1222 | O2P  | RA | 39 | 11.690 | -12.008 | -9.350 | 0.00 | 0.00 |
| ATOM | 1223 | O5'  | RA | 39 | 11.150 | -10.987 | -7.240 | 0.00 | 0.00 |
| ATOM | 1224 | C5'  | RA | 39 | 10.858 | -11.767 | -6.165 | 0.00 | 0.00 |
| ATOM | 1225 | 1H5' | RA | 39 | 11.369 | -12.674 | -6.256 | 0.00 | 0.00 |
| ATOM | 1226 | 2H5' | RA | 39 | 9.842  | -11.958 | -6.131 | 0.00 | 0.00 |
| ATOM | 1227 | C4'  | RA | 39 | 11.266 | -11.086 | -4.903 | 0.00 | 0.00 |
| ATOM | 1228 | H4'  | RA | 39 | 12.239 | -10.701 | -5.013 | 0.00 | 0.00 |
| ATOM | 1229 | O4'  | RA | 39 | 10.393 | -10.055 | -4.582 | 0.00 | 0.00 |
| ATOM | 1230 | C1'  | RA | 39 | 10.253 | -9.953  | -3.195 | 0.00 | 0.00 |
| ATOM | 1231 | H1'  | RA | 39 | 10.560 | -8.987  | -2.858 | 0.00 | 0.00 |
| ATOM | 1232 | N9   | RA | 39 | 8.854  | -10.139 | -2.816 | 0.00 | 0.00 |
| ATOM | 1233 | C8   | RA | 39 | 7.781  | -10.341 | -3.608 | 0.00 | 0.00 |
| ATOM | 1234 | H8   | RA | 39 | 7.863  | -10.419 | -4.658 | 0.00 | 0.00 |
| ATOM | 1235 | N7   | RA | 39 | 6.655  | -10.419 | -2.987 | 0.00 | 0.00 |
| ATOM | 1236 | C5   | RA | 39 | 7.015  | -10.236 | -1.670 | 0.00 | 0.00 |
| ATOM | 1237 | C6   | RA | 39 | 6.329  | -10.168 | -0.459 | 0.00 | 0.00 |
| ATOM | 1238 | N6   | RA | 39 | 5.051  | -10.273 | -0.317 | 0.00 | 0.00 |
| ATOM | 1239 | H61  | RA | 39 | 4.679  | -10.199 | 0.582  | 0.00 | 0.00 |
| ATOM | 1240 | H62  | RA | 39 | 4.494  | -10.429 | -1.106 | 0.00 | 0.00 |
| ATOM | 1241 | N1   | RA | 39 | 6.962  | -9.959  | 0.669  | 0.00 | 0.00 |
| ATOM | 1242 | C2   | RA | 39 | 8.254  | -9.807  | 0.618  | 0.00 | 0.00 |
| ATOM | 1243 | H2   | RA | 39 | 8.734  | -9.634  | 1.543  | 0.00 | 0.00 |
| ATOM | 1244 | N3   | RA | 39 | 9.033  | -9.842  | -0.430 | 0.00 | 0.00 |
| ATOM | 1245 | C4   | RA | 39 | 8.348  | -10.062 | -1.559 | 0.00 | 0.00 |
| ATOM | 1246 | C3'  | RA | 39 | 11.267 | -12.005 | -3.720 | 0.00 | 0.00 |
| ATOM | 1247 | H3'  | RA | 39 | 10.390 | -12.597 | -3.743 | 0.00 | 0.00 |
| ATOM | 1248 | C2'  | RA | 39 | 11.166 | -11.007 | -2.603 | 0.00 | 0.00 |
| ATOM | 1249 | 1H2' | RA | 39 | 10.746 | -11.461 | -1.737 | 0.00 | 0.00 |
| ATOM | 1250 | O2'  | RA | 39 | 12.389 | -10.415 | -2.298 | 0.00 | 0.00 |
| ATOM | 1251 | 2HO' | RA | 39 | 12.786 | -10.679 | -2.219 | 0.00 | 0.00 |
| ATOM | 1252 | O3'  | RA | 39 | 12.419 | -12.782 | -3.647 | 0.00 | 0.00 |
| ATOM | 1253 | P    | RC | 40 | 12.376 | -14.232 | -3.125 | 0.00 | 0.00 |
| ATOM | 1254 | O1P  | RC | 40 | 11.347 | -14.931 | -3.851 | 0.00 | 0.00 |
| ATOM | 1255 | O2P  | RC | 40 | 13.720 | -14.741 | -3.149 | 0.00 | 0.00 |
| ATOM | 1256 | O5'  | RC | 40 | 11.926 | -14.122 | -1.638 | 0.00 | 0.00 |
| ATOM | 1257 | C5'  | RC | 40 | 12.769 | -13.630 | -0.639 | 0.00 | 0.00 |
| ATOM | 1258 | 1H5' | RC | 40 | 13.141 | -12.672 | -0.922 | 0.00 | 0.00 |
| ATOM | 1259 | 2H5' | RC | 40 | 13.598 | -14.287 | -0.518 | 0.00 | 0.00 |
| ATOM | 1260 | C4'  | RC | 40 | 12.059 | -13.500 | 0.688  | 0.00 | 0.00 |
| ATOM | 1261 | H4'  | RC | 40 | 12.763 | -13.130 | 1.403  | 0.00 | 0.00 |
| ATOM | 1262 | O4'  | RC | 40 | 10.972 | -12.608 | 0.621  | 0.00 | 0.00 |
| ATOM | 1263 | C1'  | RC | 40 | 9.949  | -13.045 | 1.492  | 0.00 | 0.00 |
| ATOM | 1264 | H1'  | RC | 40 | 9.760  | -12.288 | 2.230  | 0.00 | 0.00 |
| ATOM | 1265 | N1   | RC | 40 | 8.681  | -13.329 | 0.771  | 0.00 | 0.00 |
| ATOM | 1266 | C6   | RC | 40 | 8.637  | -13.591 | -0.558 | 0.00 | 0.00 |
| ATOM | 1267 | H6   | RC | 40 | 9.543  | -13.634 | -1.106 | 0.00 | 0.00 |
| ATOM | 1268 | C5   | RC | 40 | 7.461  | -13.778 | -1.181 | 0.00 | 0.00 |
| ATOM | 1269 | H5   | RC | 40 | 7.435  | -13.966 | -2.222 | 0.00 | 0.00 |
| ATOM | 1270 | C4   | RC | 40 | 6.301  | -13.710 | -0.409 | 0.00 | 0.00 |
| ATOM | 1271 | N4   | RC | 40 | 5.145  | -13.839 | -0.960 | 0.00 | 0.00 |
| ATOM | 1272 | H41  | RC | 40 | 4.353  | -13.744 | -0.386 | 0.00 | 0.00 |
| ATOM | 1273 | H42  | RC | 40 | 5.078  | -13.980 | -1.928 | 0.00 | 0.00 |
| ATOM | 1274 | N3   | RC | 40 | 6.312  | -13.486 | 0.870  | 0.00 | 0.00 |
| ATOM | 1275 | C2   | RC | 40 | 7.494  | -13.307 | 1.482  | 0.00 | 0.00 |
| ATOM | 1276 | O2   | RC | 40 | 7.478  | -13.119 | 2.679  | 0.00 | 0.00 |
| ATOM | 1277 | C3'  | RC | 40 | 11.507 | -14.799 | 1.214  | 0.00 | 0.00 |
| ATOM | 1278 | H3'  | RC | 40 | 11.012 | -15.316 | 0.418  | 0.00 | 0.00 |
| ATOM | 1279 | C2'  | RC | 40 | 10.482 | -14.277 | 2.191  | 0.00 | 0.00 |
| ATOM | 1280 | 1H2' | RC | 40 | 9.715  | -15.003 | 2.358  | 0.00 | 0.00 |
| ATOM | 1281 | O2'  | RC | 40 | 11.054 | -13.878 | 3.401  | 0.00 | 0.00 |
| ATOM | 1282 | 2HO' | RC | 40 | 11.386 | -14.329 | 3.714  | 0.00 | 0.00 |
| ATOM | 1283 | O3'  | RC | 40 | 12.491 | -15.596 | 1.812  | 0.00 | 0.00 |
| ATOM | 1284 | P    | RA | 41 | 12.321 | -17.142 | 1.939  | 0.00 | 0.00 |
| ATOM | 1285 | O1P  | RA | 41 | 11.856 | -17.647 | 0.671  | 0.00 | 0.00 |

|      |      |      |    |    |        |         |        |      |      |
|------|------|------|----|----|--------|---------|--------|------|------|
| ATOM | 1286 | O2P  | RA | 41 | 13.546 | -17.670 | 2.491  | 0.00 | 0.00 |
| ATOM | 1287 | O5'  | RA | 41 | 11.174 | -17.346 | 2.980  | 0.00 | 0.00 |
| ATOM | 1288 | C5'  | RA | 41 | 11.390 | -17.181 | 4.347  | 0.00 | 0.00 |
| ATOM | 1289 | 1H5' | RA | 41 | 11.856 | -16.243 | 4.530  | 0.00 | 0.00 |
| ATOM | 1290 | 2H5' | RA | 41 | 12.038 | -17.948 | 4.702  | 0.00 | 0.00 |
| ATOM | 1291 | C4'  | RA | 41 | 10.104 | -17.235 | 5.134  | 0.00 | 0.00 |
| ATOM | 1292 | H4'  | RA | 41 | 10.334 | -17.056 | 6.165  | 0.00 | 0.00 |
| ATOM | 1293 | O4'  | RA | 41 | 9.196  | -16.250 | 4.703  | 0.00 | 0.00 |
| ATOM | 1294 | C1'  | RA | 41 | 7.886  | -16.754 | 4.809  | 0.00 | 0.00 |
| ATOM | 1295 | H1'  | RA | 41 | 7.304  | -16.128 | 5.454  | 0.00 | 0.00 |
| ATOM | 1296 | N9   | RA | 41 | 7.225  | -16.809 | 3.499  | 0.00 | 0.00 |
| ATOM | 1297 | C8   | RA | 41 | 7.765  | -16.987 | 2.269  | 0.00 | 0.00 |
| ATOM | 1298 | H8   | RA | 41 | 8.807  | -17.126 | 2.116  | 0.00 | 0.00 |
| ATOM | 1299 | N7   | RA | 41 | 6.911  | -16.941 | 1.295  | 0.00 | 0.00 |
| ATOM | 1300 | C5   | RA | 41 | 5.699  | -16.762 | 1.947  | 0.00 | 0.00 |
| ATOM | 1301 | C6   | RA | 41 | 4.355  | -16.645 | 1.548  | 0.00 | 0.00 |
| ATOM | 1302 | N6   | RA | 41 | 3.923  | -16.647 | 0.319  | 0.00 | 0.00 |
| ATOM | 1303 | H61  | RA | 41 | 2.953  | -16.533 | 0.159  | 0.00 | 0.00 |
| ATOM | 1304 | H62  | RA | 41 | 4.571  | -16.707 | -0.413 | 0.00 | 0.00 |
| ATOM | 1305 | N1   | RA | 41 | 3.393  | -16.511 | 2.439  | 0.00 | 0.00 |
| ATOM | 1306 | C2   | RA | 41 | 3.728  | -16.498 | 3.709  | 0.00 | 0.00 |
| ATOM | 1307 | H2   | RA | 41 | 2.928  | -16.395 | 4.396  | 0.00 | 0.00 |
| ATOM | 1308 | N3   | RA | 41 | 4.929  | -16.590 | 4.237  | 0.00 | 0.00 |
| ATOM | 1309 | C4   | RA | 41 | 5.883  | -16.717 | 3.290  | 0.00 | 0.00 |
| ATOM | 1310 | C3'  | RA | 41 | 9.389  | -18.561 | 5.053  | 0.00 | 0.00 |
| ATOM | 1311 | H3'  | RA | 41 | 9.406  | -18.899 | 4.037  | 0.00 | 0.00 |
| ATOM | 1312 | C2'  | RA | 41 | 7.985  | -18.131 | 5.417  | 0.00 | 0.00 |
| ATOM | 1313 | 1H2' | RA | 41 | 7.259  | -18.791 | 4.994  | 0.00 | 0.00 |
| ATOM | 1314 | O2'  | RA | 41 | 7.803  | -18.024 | 6.798  | 0.00 | 0.00 |
| ATOM | 1315 | 2HO' | RA | 41 | 7.825  | -18.734 | 7.113  | 0.00 | 0.00 |
| ATOM | 1316 | O3'  | RA | 41 | 9.928  | -19.524 | 5.920  | 0.00 | 0.00 |
| ATOM | 1317 | P    | RG | 42 | 9.503  | -21.029 | 5.840  | 0.00 | 0.00 |
| ATOM | 1318 | O1P  | RG | 42 | 9.536  | -21.433 | 4.450  | 0.00 | 0.00 |
| ATOM | 1319 | O2P  | RG | 42 | 10.303 | -21.750 | 6.800  | 0.00 | 0.00 |
| ATOM | 1320 | O5'  | RG | 42 | 8.020  | -21.041 | 6.347  | 0.00 | 0.00 |
| ATOM | 1321 | C5'  | RG | 42 | 7.153  | -21.698 | 6.221  | 0.00 | 0.00 |
| ATOM | 1322 | 1H5' | RG | 42 | 7.429  | -22.315 | 6.566  | 0.00 | 0.00 |
| ATOM | 1323 | 2H5' | RG | 42 | 7.190  | -21.857 | 5.492  | 0.00 | 0.00 |
| ATOM | 1324 | C4'  | RG | 42 | 5.762  | -21.334 | 6.639  | 0.00 | 0.00 |
| ATOM | 1325 | H4'  | RG | 42 | 5.734  | -21.243 | 7.697  | 0.00 | 0.00 |
| ATOM | 1326 | O4'  | RG | 42 | 5.356  | -20.119 | 6.065  | 0.00 | 0.00 |
| ATOM | 1327 | C1'  | RG | 42 | 4.018  | -20.220 | 5.646  | 0.00 | 0.00 |
| ATOM | 1328 | H1'  | RG | 42 | 3.438  | -19.413 | 6.045  | 0.00 | 0.00 |
| ATOM | 1329 | N9   | RG | 42 | 3.938  | -20.163 | 4.181  | 0.00 | 0.00 |
| ATOM | 1330 | C8   | RG | 42 | 4.945  | -20.185 | 3.274  | 0.00 | 0.00 |
| ATOM | 1331 | H8   | RG | 42 | 5.968  | -20.279 | 3.555  | 0.00 | 0.00 |
| ATOM | 1332 | N7   | RG | 42 | 4.562  | -20.069 | 2.046  | 0.00 | 0.00 |
| ATOM | 1333 | C5   | RG | 42 | 3.185  | -19.962 | 2.139  | 0.00 | 0.00 |
| ATOM | 1334 | C6   | RG | 42 | 2.177  | -19.806 | 1.140  | 0.00 | 0.00 |
| ATOM | 1335 | O6   | RG | 42 | 2.296  | -19.695 | -0.064 | 0.00 | 0.00 |
| ATOM | 1336 | N1   | RG | 42 | 0.909  | -19.786 | 1.643  | 0.00 | 0.00 |
| ATOM | 1337 | H1   | RG | 42 | 0.156  | -19.735 | 0.995  | 0.00 | 0.00 |
| ATOM | 1338 | C2   | RG | 42 | 0.628  | -19.881 | 2.947  | 0.00 | 0.00 |
| ATOM | 1339 | N2   | RG | 42 | -0.621 | -19.896 | 3.268  | 0.00 | 0.00 |
| ATOM | 1340 | H21  | RG | 42 | -1.320 | -19.904 | 2.563  | 0.00 | 0.00 |
| ATOM | 1341 | H22  | RG | 42 | -0.850 | -19.968 | 4.227  | 0.00 | 0.00 |
| ATOM | 1342 | N3   | RG | 42 | 1.525  | -19.991 | 3.911  | 0.00 | 0.00 |
| ATOM | 1343 | C4   | RG | 42 | 2.795  | -20.036 | 3.445  | 0.00 | 0.00 |
| ATOM | 1344 | C3'  | RG | 42 | 4.741  | -22.369 | 6.236  | 0.00 | 0.00 |
| ATOM | 1345 | H3'  | RG | 42 | 4.965  | -22.713 | 5.253  | 0.00 | 0.00 |
| ATOM | 1346 | C2'  | RG | 42 | 3.486  | -21.532 | 6.194  | 0.00 | 0.00 |
| ATOM | 1347 | 1H2' | RG | 42 | 2.750  | -21.966 | 5.554  | 0.00 | 0.00 |
| ATOM | 1348 | O2'  | RG | 42 | 2.961  | -21.305 | 7.466  | 0.00 | 0.00 |
| ATOM | 1349 | 2HO' | RG | 42 | 2.890  | -21.670 | 7.787  | 0.00 | 0.00 |
| ATOM | 1350 | O3'  | RG | 42 | 4.667  | -23.424 | 7.153  | 0.00 | 0.00 |
| ATOM | 1351 | P    | RC | 43 | 4.224  | -24.855 | 6.713  | 0.00 | 0.00 |
| ATOM | 1352 | O1P  | RC | 43 | 4.981  | -25.207 | 5.538  | 0.00 | 0.00 |
| ATOM | 1353 | O2P  | RC | 43 | 4.293  | -25.714 | 7.878  | 0.00 | 0.00 |

|      |      |      |    |    |        |         |        |      |      |
|------|------|------|----|----|--------|---------|--------|------|------|
| ATOM | 1354 | O5'  | RC | 43 | 2.723  | -24.723 | 6.292  | 0.00 | 0.00 |
| ATOM | 1355 | C5'  | RC | 43 | 1.703  | -24.556 | 7.227  | 0.00 | 0.00 |
| ATOM | 1356 | 1H5' | RC | 43 | 1.893  | -23.696 | 7.827  | 0.00 | 0.00 |
| ATOM | 1357 | 2H5' | RC | 43 | 1.668  | -25.410 | 7.871  | 0.00 | 0.00 |
| ATOM | 1358 | C4'  | RC | 43 | 0.351  | -24.404 | 6.571  | 0.00 | 0.00 |
| ATOM | 1359 | H4'  | RC | 43 | -0.381 | -24.298 | 7.340  | 0.00 | 0.00 |
| ATOM | 1360 | O4'  | RC | 43 | 0.280  | -23.274 | 5.734  | 0.00 | 0.00 |
| ATOM | 1361 | C1'  | RC | 43 | -0.593 | -23.556 | 4.657  | 0.00 | 0.00 |
| ATOM | 1362 | H1'  | RC | 43 | -1.414 | -22.866 | 4.670  | 0.00 | 0.00 |
| ATOM | 1363 | N1   | RC | 43 | 0.072  | -23.449 | 3.342  | 0.00 | 0.00 |
| ATOM | 1364 | C6   | RC | 43 | 1.417  | -23.544 | 3.199  | 0.00 | 0.00 |
| ATOM | 1365 | H6   | RC | 43 | 2.021  | -23.730 | 4.052  | 0.00 | 0.00 |
| ATOM | 1366 | C5   | RC | 43 | 1.984  | -23.388 | 1.993  | 0.00 | 0.00 |
| ATOM | 1367 | H5   | RC | 43 | 3.038  | -23.461 | 1.890  | 0.00 | 0.00 |
| ATOM | 1368 | C4   | RC | 43 | 1.136  | -23.152 | 0.904  | 0.00 | 0.00 |
| ATOM | 1369 | N4   | RC | 43 | 1.621  | -22.981 | -0.269 | 0.00 | 0.00 |
| ATOM | 1370 | H41  | RC | 43 | 0.999  | -22.782 | -1.010 | 0.00 | 0.00 |
| ATOM | 1371 | H42  | RC | 43 | 2.592  | -22.994 | -0.389 | 0.00 | 0.00 |
| ATOM | 1372 | N3   | RC | 43 | -0.158 | -23.080 | 1.010  | 0.00 | 0.00 |
| ATOM | 1373 | C2   | RC | 43 | -0.711 | -23.237 | 2.221  | 0.00 | 0.00 |
| ATOM | 1374 | O2   | RC | 43 | -1.922 | -23.213 | 2.297  | 0.00 | 0.00 |
| ATOM | 1375 | C3'  | RC | 43 | -0.047 | -25.583 | 5.724  | 0.00 | 0.00 |
| ATOM | 1376 | H3'  | RC | 43 | 0.773  | -25.848 | 5.099  | 0.00 | 0.00 |
| ATOM | 1377 | C2'  | RC | 43 | -1.131 | -24.953 | 4.885  | 0.00 | 0.00 |
| ATOM | 1378 | 1H2' | RC | 43 | -1.263 | -25.478 | 3.971  | 0.00 | 0.00 |
| ATOM | 1379 | O2'  | RC | 43 | -2.337 | -24.855 | 5.562  | 0.00 | 0.00 |
| ATOM | 1380 | 2HO' | RC | 43 | -2.498 | -25.377 | 5.907  | 0.00 | 0.00 |
| ATOM | 1381 | O3'  | RC | 43 | -0.497 | -26.672 | 6.476  | 0.00 | 0.00 |
| ATOM | 1382 | P    | RA | 44 | -0.419 | -28.116 | 5.921  | 0.00 | 0.00 |
| ATOM | 1383 | O1P  | RA | 44 | 0.880  | -28.297 | 5.334  | 0.00 | 0.00 |
| ATOM | 1384 | O2P  | RA | 44 | -0.843 | -29.015 | 6.967  | 0.00 | 0.00 |
| ATOM | 1385 | O5'  | RA | 44 | -1.472 | -28.172 | 4.775  | 0.00 | 0.00 |
| ATOM | 1386 | C5'  | RA | 44 | -2.835 | -28.265 | 5.038  | 0.00 | 0.00 |
| ATOM | 1387 | 1H5' | RA | 44 | -3.144 | -27.468 | 5.666  | 0.00 | 0.00 |
| ATOM | 1388 | 2H5' | RA | 44 | -3.029 | -29.181 | 5.539  | 0.00 | 0.00 |
| ATOM | 1389 | C4'  | RA | 44 | -3.664 | -28.224 | 3.780  | 0.00 | 0.00 |
| ATOM | 1390 | H4'  | RA | 44 | -4.692 | -28.295 | 4.061  | 0.00 | 0.00 |
| ATOM | 1391 | O4'  | RA | 44 | -3.489 | -27.032 | 3.060  | 0.00 | 0.00 |
| ATOM | 1392 | C1'  | RA | 44 | -3.610 | -27.312 | 1.688  | 0.00 | 0.00 |
| ATOM | 1393 | H1'  | RA | 44 | -4.387 | -26.719 | 1.249  | 0.00 | 0.00 |
| ATOM | 1394 | N9   | RA | 44 | -2.356 | -27.013 | 0.998  | 0.00 | 0.00 |
| ATOM | 1395 | C8   | RA | 44 | -1.099 | -26.914 | 1.500  | 0.00 | 0.00 |
| ATOM | 1396 | H8   | RA | 44 | -0.875 | -27.100 | 2.520  | 0.00 | 0.00 |
| ATOM | 1397 | N7   | RA | 44 | -0.203 | -26.553 | 0.645  | 0.00 | 0.00 |
| ATOM | 1398 | C5   | RA | 44 | -0.929 | -26.436 | -0.529 | 0.00 | 0.00 |
| ATOM | 1399 | C6   | RA | 44 | -0.632 | -26.091 | -1.850 | 0.00 | 0.00 |
| ATOM | 1400 | N6   | RA | 44 | 0.535  | -25.717 | -2.287 | 0.00 | 0.00 |
| ATOM | 1401 | H61  | RA | 44 | 0.618  | -25.471 | -3.238 | 0.00 | 0.00 |
| ATOM | 1402 | H62  | RA | 44 | 1.289  | -25.646 | -1.658 | 0.00 | 0.00 |
| ATOM | 1403 | N1   | RA | 44 | -1.564 | -26.104 | -2.783 | 0.00 | 0.00 |
| ATOM | 1404 | C2   | RA | 44 | -2.779 | -26.444 | -2.434 | 0.00 | 0.00 |
| ATOM | 1405 | H2   | RA | 44 | -3.502 | -26.446 | -3.212 | 0.00 | 0.00 |
| ATOM | 1406 | N3   | RA | 44 | -3.219 | -26.765 | -1.243 | 0.00 | 0.00 |
| ATOM | 1407 | C4   | RA | 44 | -2.233 | -26.743 | -0.325 | 0.00 | 0.00 |
| ATOM | 1408 | C3'  | RA | 44 | -3.369 | -29.344 | 2.821  | 0.00 | 0.00 |
| ATOM | 1409 | H3'  | RA | 44 | -2.313 | -29.439 | 2.702  | 0.00 | 0.00 |
| ATOM | 1410 | C2'  | RA | 44 | -3.972 | -28.770 | 1.564  | 0.00 | 0.00 |
| ATOM | 1411 | 1H2' | RA | 44 | -3.541 | -29.205 | 0.693  | 0.00 | 0.00 |
| ATOM | 1412 | O2'  | RA | 44 | -5.357 | -28.874 | 1.526  | 0.00 | 0.00 |
| ATOM | 1413 | 2HO' | RA | 44 | -5.580 | -29.390 | 1.533  | 0.00 | 0.00 |
| ATOM | 1414 | O3'  | RA | 44 | -3.939 | -30.555 | 3.199  | 0.00 | 0.00 |
| ATOM | 1415 | P    | RA | 45 | -3.346 | -31.906 | 2.713  | 0.00 | 0.00 |
| ATOM | 1416 | O1P  | RA | 45 | -1.918 | -31.868 | 2.906  | 0.00 | 0.00 |
| ATOM | 1417 | O2P  | RA | 45 | -4.105 | -32.960 | 3.337  | 0.00 | 0.00 |
| ATOM | 1418 | O5'  | RA | 45 | -3.618 | -31.954 | 1.179  | 0.00 | 0.00 |
| ATOM | 1419 | C5'  | RA | 45 | -4.883 | -32.224 | 0.669  | 0.00 | 0.00 |
| ATOM | 1420 | 1H5' | RA | 45 | -5.591 | -31.561 | 1.092  | 0.00 | 0.00 |
| ATOM | 1421 | 2H5' | RA | 45 | -5.163 | -33.216 | 0.917  | 0.00 | 0.00 |

|      |      |      |     |    |        |         |        |      |      |
|------|------|------|-----|----|--------|---------|--------|------|------|
| ATOM | 1422 | C4'  | RA  | 45 | -4.930 | -32.082 | -0.827 | 0.00 | 0.00 |
| ATOM | 1423 | H4'  | RA  | 45 | -5.923 | -32.299 | -1.141 | 0.00 | 0.00 |
| ATOM | 1424 | O4'  | RA  | 45 | -4.604 | -30.792 | -1.251 | 0.00 | 0.00 |
| ATOM | 1425 | C1'  | RA  | 45 | -3.959 | -30.867 | -2.492 | 0.00 | 0.00 |
| ATOM | 1426 | H1'  | RA  | 45 | -4.484 | -30.295 | -3.223 | 0.00 | 0.00 |
| ATOM | 1427 | N9   | RA  | 45 | -2.596 | -30.347 | -2.407 | 0.00 | 0.00 |
| ATOM | 1428 | C8   | RA  | 45 | -1.774 | -30.254 | -1.343 | 0.00 | 0.00 |
| ATOM | 1429 | H8   | RA  | 45 | -2.061 | -30.577 | -0.378 | 0.00 | 0.00 |
| ATOM | 1430 | N7   | RA  | 45 | -0.618 | -29.743 | -1.602 | 0.00 | 0.00 |
| ATOM | 1431 | C5   | RA  | 45 | -0.683 | -29.488 | -2.954 | 0.00 | 0.00 |
| ATOM | 1432 | C6   | RA  | 45 | 0.184  | -28.952 | -3.911 | 0.00 | 0.00 |
| ATOM | 1433 | N6   | RA  | 45 | 1.377  | -28.513 | -3.679 | 0.00 | 0.00 |
| ATOM | 1434 | H61  | RA  | 45 | 1.889  | -28.122 | -4.423 | 0.00 | 0.00 |
| ATOM | 1435 | H62  | RA  | 45 | 1.721  | -28.534 | -2.765 | 0.00 | 0.00 |
| ATOM | 1436 | N1   | RA  | 45 | -0.159 | -28.872 | -5.169 | 0.00 | 0.00 |
| ATOM | 1437 | C2   | RA  | 45 | -1.348 | -29.297 | -5.496 | 0.00 | 0.00 |
| ATOM | 1438 | H2   | RA  | 45 | -1.594 | -29.219 | -6.519 | 0.00 | 0.00 |
| ATOM | 1439 | N3   | RA  | 45 | -2.275 | -29.805 | -4.724 | 0.00 | 0.00 |
| ATOM | 1440 | C4   | RA  | 45 | -1.876 | -29.874 | -3.449 | 0.00 | 0.00 |
| ATOM | 1441 | C3'  | RA  | 45 | -4.000 | -32.996 | -1.561 | 0.00 | 0.00 |
| ATOM | 1442 | H3'  | RA  | 45 | -3.039 | -32.939 | -1.117 | 0.00 | 0.00 |
| ATOM | 1443 | C2'  | RA  | 45 | -3.954 | -32.312 | -2.893 | 0.00 | 0.00 |
| ATOM | 1444 | 1H2' | RA  | 45 | -3.072 | -32.566 | -3.428 | 0.00 | 0.00 |
| ATOM | 1445 | O2'  | RA  | 45 | -5.080 | -32.554 | -3.661 | 0.00 | 0.00 |
| ATOM | 1446 | 2HO' | RA  | 45 | -5.201 | -33.081 | -3.804 | 0.00 | 0.00 |
| ATOM | 1447 | O3'  | RA  | 45 | -4.454 | -34.304 | -1.625 | 0.00 | 0.00 |
| ATOM | 1448 | P    | RG3 | 46 | -3.467 | -35.462 | -1.814 | 0.00 | 0.00 |
| ATOM | 1449 | O1P  | RG3 | 46 | -2.383 | -35.280 | -0.903 | 0.00 | 0.00 |
| ATOM | 1450 | O2P  | RG3 | 46 | -4.228 | -36.682 | -1.760 | 0.00 | 0.00 |
| ATOM | 1451 | O5'  | RG3 | 46 | -2.892 | -35.279 | -3.249 | 0.00 | 0.00 |
| ATOM | 1452 | C5'  | RG3 | 46 | -3.636 | -35.576 | -4.361 | 0.00 | 0.00 |
| ATOM | 1453 | 1H5' | RG3 | 46 | -4.539 | -35.048 | -4.338 | 0.00 | 0.00 |
| ATOM | 1454 | 2H5' | RG3 | 46 | -3.865 | -36.601 | -4.362 | 0.00 | 0.00 |
| ATOM | 1455 | C4'  | RG3 | 46 | -2.916 | -35.238 | -5.627 | 0.00 | 0.00 |
| ATOM | 1456 | H4'  | RG3 | 46 | -3.552 | -35.485 | -6.428 | 0.00 | 0.00 |
| ATOM | 1457 | O4'  | RG3 | 46 | -2.605 | -33.892 | -5.718 | 0.00 | 0.00 |
| ATOM | 1458 | C1'  | RG3 | 46 | -1.408 | -33.734 | -6.409 | 0.00 | 0.00 |
| ATOM | 1459 | H1'  | RG3 | 46 | -1.547 | -33.168 | -7.282 | 0.00 | 0.00 |
| ATOM | 1460 | N9   | RG3 | 46 | -0.410 | -33.055 | -5.616 | 0.00 | 0.00 |
| ATOM | 1461 | C8   | RG3 | 46 | -0.229 | -33.069 | -4.290 | 0.00 | 0.00 |
| ATOM | 1462 | H8   | RG3 | 46 | -0.888 | -33.567 | -3.634 | 0.00 | 0.00 |
| ATOM | 1463 | N7   | RG3 | 46 | 0.818  | -32.443 | -3.902 | 0.00 | 0.00 |
| ATOM | 1464 | C5   | RG3 | 46 | 1.382  | -31.986 | -5.065 | 0.00 | 0.00 |
| ATOM | 1465 | C6   | RG3 | 46 | 2.567  | -31.256 | -5.323 | 0.00 | 0.00 |
| ATOM | 1466 | O6   | RG3 | 46 | 3.396  | -30.849 | -4.557 | 0.00 | 0.00 |
| ATOM | 1467 | N1   | RG3 | 46 | 2.787  | -31.018 | -6.633 | 0.00 | 0.00 |
| ATOM | 1468 | H1   | RG3 | 46 | 3.610  | -30.535 | -6.880 | 0.00 | 0.00 |
| ATOM | 1469 | C2   | RG3 | 46 | 1.981  | -31.434 | -7.595 | 0.00 | 0.00 |
| ATOM | 1470 | N2   | RG3 | 46 | 2.333  | -31.184 | -8.794 | 0.00 | 0.00 |
| ATOM | 1471 | H21  | RG3 | 46 | 3.190  | -30.749 | -8.985 | 0.00 | 0.00 |
| ATOM | 1472 | H22  | RG3 | 46 | 1.751  | -31.494 | -9.513 | 0.00 | 0.00 |
| ATOM | 1473 | N3   | RG3 | 46 | 0.876  | -32.101 | -7.408 | 0.00 | 0.00 |
| ATOM | 1474 | C4   | RG3 | 46 | 0.627  | -32.351 | -6.116 | 0.00 | 0.00 |
| ATOM | 1475 | C3'  | RG3 | 46 | -1.642 | -35.965 | -5.818 | 0.00 | 0.00 |
| ATOM | 1476 | H3'  | RG3 | 46 | -1.110 | -35.976 | -4.933 | 0.00 | 0.00 |
| ATOM | 1477 | C2'  | RG3 | 46 | -0.941 | -35.087 | -6.783 | 0.00 | 0.00 |
| ATOM | 1478 | 1H2' | RG3 | 46 | 0.082  | -35.162 | -6.682 | 0.00 | 0.00 |
| ATOM | 1479 | O2'  | RG3 | 46 | -1.303 | -35.355 | -8.052 | 0.00 | 0.00 |
| ATOM | 1480 | 2HO' | RG3 | 46 | -1.208 | -35.686 | -8.290 | 0.00 | 0.00 |
| ATOM | 1481 | O3'  | RG3 | 46 | -1.788 | -37.227 | -6.300 | 0.00 | 0.00 |
| ATOM | 1482 | H3T  | RG3 | 46 | -1.602 | -37.474 | -6.369 | 0.00 | 0.00 |



# closed-like bulged-in conformation - closed-like\_bulged-in\_c.pdb

REMARK MD average structure 15100 - 15200 ps  
REMARK 2D19 (PDB database)  
REMARK sequence chain I. residues 1-17 5'(GCUGAGGUGCACACAGC)3'  
REMARK sequence chain II. residues 18-34 5'(GCUGAGGUGCACACAGC)3'  
REMARK PDB format: output from Ptraj module of AMBER-8.0

|      |    |      |     |   |        |        |         |      |      |
|------|----|------|-----|---|--------|--------|---------|------|------|
| ATOM | 1  | H5T  | RG5 | 1 | 16.141 | 6.528  | -8.802  | 0.00 | 0.00 |
| ATOM | 2  | O5'  | RG5 | 1 | 16.127 | 6.190  | -8.942  | 0.00 | 0.00 |
| ATOM | 3  | C5'  | RG5 | 1 | 15.583 | 5.084  | -8.468  | 0.00 | 0.00 |
| ATOM | 4  | 1H5' | RG5 | 1 | 14.701 | 4.896  | -8.965  | 0.00 | 0.00 |
| ATOM | 5  | 2H5' | RG5 | 1 | 15.396 | 5.216  | -7.487  | 0.00 | 0.00 |
| ATOM | 6  | C4'  | RG5 | 1 | 16.458 | 3.951  | -8.644  | 0.00 | 0.00 |
| ATOM | 7  | H4'  | RG5 | 1 | 16.719 | 3.889  | -9.634  | 0.00 | 0.00 |
| ATOM | 8  | O4'  | RG5 | 1 | 17.587 | 4.065  | -7.864  | 0.00 | 0.00 |
| ATOM | 9  | C1'  | RG5 | 1 | 17.953 | 2.832  | -7.379  | 0.00 | 0.00 |
| ATOM | 10 | H1'  | RG5 | 1 | 18.934 | 2.593  | -7.666  | 0.00 | 0.00 |
| ATOM | 11 | N9   | RG5 | 1 | 17.918 | 2.821  | -5.929  | 0.00 | 0.00 |
| ATOM | 12 | C8   | RG5 | 1 | 17.496 | 3.774  | -5.095  | 0.00 | 0.00 |
| ATOM | 13 | H8   | RG5 | 1 | 17.074 | 4.665  | -5.440  | 0.00 | 0.00 |
| ATOM | 14 | N7   | RG5 | 1 | 17.665 | 3.518  | -3.853  | 0.00 | 0.00 |
| ATOM | 15 | C5   | RG5 | 1 | 18.249 | 2.291  | -3.857  | 0.00 | 0.00 |
| ATOM | 16 | C6   | RG5 | 1 | 18.701 | 1.475  | -2.806  | 0.00 | 0.00 |
| ATOM | 17 | O6   | RG5 | 1 | 18.702 | 1.685  | -1.620  | 0.00 | 0.00 |
| ATOM | 18 | N1   | RG5 | 1 | 19.200 | 0.301  | -3.224  | 0.00 | 0.00 |
| ATOM | 19 | H1   | RG5 | 1 | 19.496 | -0.328 | -2.535  | 0.00 | 0.00 |
| ATOM | 20 | C2   | RG5 | 1 | 19.298 | -0.040 | -4.501  | 0.00 | 0.00 |
| ATOM | 21 | N2   | RG5 | 1 | 19.782 | -1.183 | -4.752  | 0.00 | 0.00 |
| ATOM | 22 | H21  | RG5 | 1 | 20.027 | -1.777 | -4.015  | 0.00 | 0.00 |
| ATOM | 23 | H22  | RG5 | 1 | 19.869 | -1.447 | -5.687  | 0.00 | 0.00 |
| ATOM | 24 | N3   | RG5 | 1 | 18.926 | 0.693  | -5.508  | 0.00 | 0.00 |
| ATOM | 25 | C4   | RG5 | 1 | 18.398 | 1.855  | -5.126  | 0.00 | 0.00 |
| ATOM | 26 | C3'  | RG5 | 1 | 15.816 | 2.689  | -8.281  | 0.00 | 0.00 |
| ATOM | 27 | H3'  | RG5 | 1 | 15.289 | 2.823  | -7.402  | 0.00 | 0.00 |
| ATOM | 28 | C2'  | RG5 | 1 | 17.004 | 1.863  | -8.001  | 0.00 | 0.00 |
| ATOM | 29 | 1H2' | RG5 | 1 | 16.782 | 1.092  | -7.345  | 0.00 | 0.00 |
| ATOM | 30 | O2'  | RG5 | 1 | 17.555 | 1.380  | -9.145  | 0.00 | 0.00 |
| ATOM | 31 | 2HO' | RG5 | 1 | 17.143 | 1.114  | -9.529  | 0.00 | 0.00 |
| ATOM | 32 | O3'  | RG5 | 1 | 15.012 | 2.192  | -9.295  | 0.00 | 0.00 |
| ATOM | 33 | P    | RC  | 2 | 13.766 | 1.356  | -9.004  | 0.00 | 0.00 |
| ATOM | 34 | O1P  | RC  | 2 | 13.116 | 1.091  | -10.254 | 0.00 | 0.00 |
| ATOM | 35 | O2P  | RC  | 2 | 13.035 | 2.005  | -7.977  | 0.00 | 0.00 |
| ATOM | 36 | O5'  | RC  | 2 | 14.301 | 0.034  | -8.431  | 0.00 | 0.00 |
| ATOM | 37 | C5'  | RC  | 2 | 14.901 | -0.909 | -9.230  | 0.00 | 0.00 |
| ATOM | 38 | 1H5' | RC  | 2 | 15.653 | -0.457 | -9.803  | 0.00 | 0.00 |
| ATOM | 39 | 2H5' | RC  | 2 | 14.179 | -1.323 | -9.886  | 0.00 | 0.00 |
| ATOM | 40 | C4'  | RC  | 2 | 15.529 | -2.010 | -8.431  | 0.00 | 0.00 |
| ATOM | 41 | H4'  | RC  | 2 | 15.996 | -2.675 | -9.114  | 0.00 | 0.00 |
| ATOM | 42 | O4'  | RC  | 2 | 16.503 | -1.529 | -7.541  | 0.00 | 0.00 |
| ATOM | 43 | C1'  | RC  | 2 | 16.509 | -2.319 | -6.386  | 0.00 | 0.00 |
| ATOM | 44 | H1'  | RC  | 2 | 17.480 | -2.746 | -6.250  | 0.00 | 0.00 |
| ATOM | 45 | N1   | RC  | 2 | 16.167 | -1.567 | -5.169  | 0.00 | 0.00 |
| ATOM | 46 | C6   | RC  | 2 | 15.514 | -0.393 | -5.208  | 0.00 | 0.00 |
| ATOM | 47 | H6   | RC  | 2 | 15.190 | -0.011 | -6.137  | 0.00 | 0.00 |
| ATOM | 48 | C5   | RC  | 2 | 15.298 | 0.293  | -4.084  | 0.00 | 0.00 |
| ATOM | 49 | H5   | RC  | 2 | 14.806 | 1.220  | -4.119  | 0.00 | 0.00 |
| ATOM | 50 | C4   | RC  | 2 | 15.746 | -0.263 | -2.888  | 0.00 | 0.00 |
| ATOM | 51 | N4   | RC  | 2 | 15.618 | 0.362  | -1.780  | 0.00 | 0.00 |
| ATOM | 52 | H41  | RC  | 2 | 15.995 | -0.053 | -0.974  | 0.00 | 0.00 |
| ATOM | 53 | H42  | RC  | 2 | 15.221 | 1.251  | -1.769  | 0.00 | 0.00 |
| ATOM | 54 | N3   | RC  | 2 | 16.328 | -1.409 | -2.822  | 0.00 | 0.00 |
| ATOM | 55 | C2   | RC  | 2 | 16.540 | -2.084 | -3.949  | 0.00 | 0.00 |
| ATOM | 56 | O2   | RC  | 2 | 17.062 | -3.165 | -3.859  | 0.00 | 0.00 |
| ATOM | 57 | C3'  | RC  | 2 | 14.563 | -2.802 | -7.610  | 0.00 | 0.00 |
| ATOM | 58 | H3'  | RC  | 2 | 13.914 | -2.142 | -7.093  | 0.00 | 0.00 |
| ATOM | 59 | C2'  | RC  | 2 | 15.524 | -3.426 | -6.635  | 0.00 | 0.00 |
| ATOM | 60 | 1H2' | RC  | 2 | 15.023 | -3.708 | -5.745  | 0.00 | 0.00 |

|      |     |      |    |   |        |         |        |      |      |
|------|-----|------|----|---|--------|---------|--------|------|------|
| ATOM | 61  | O2'  | RC | 2 | 16.216 | -4.498  | -7.182 | 0.00 | 0.00 |
| ATOM | 62  | 2HO' | RC | 2 | 15.891 | -4.933  | -7.468 | 0.00 | 0.00 |
| ATOM | 63  | O3'  | RC | 2 | 13.849 | -3.757  | -8.331 | 0.00 | 0.00 |
| ATOM | 64  | P    | RU | 3 | 12.441 | -4.224  | -7.871 | 0.00 | 0.00 |
| ATOM | 65  | O1P  | RU | 3 | 12.021 | -5.273  | -8.752 | 0.00 | 0.00 |
| ATOM | 66  | O2P  | RU | 3 | 11.613 | -3.069  | -7.756 | 0.00 | 0.00 |
| ATOM | 67  | O5'  | RU | 3 | 12.630 | -4.809  | -6.451 | 0.00 | 0.00 |
| ATOM | 68  | C5'  | RU | 3 | 13.218 | -6.039  | -6.234 | 0.00 | 0.00 |
| ATOM | 69  | 1H5' | RU | 3 | 14.154 | -6.085  | -6.727 | 0.00 | 0.00 |
| ATOM | 70  | 2H5' | RU | 3 | 12.586 | -6.796  | -6.627 | 0.00 | 0.00 |
| ATOM | 71  | C4'  | RU | 3 | 13.450 | -6.305  | -4.778 | 0.00 | 0.00 |
| ATOM | 72  | H4'  | RU | 3 | 13.960 | -7.227  | -4.685 | 0.00 | 0.00 |
| ATOM | 73  | O4'  | RU | 3 | 14.233 | -5.316  | -4.171 | 0.00 | 0.00 |
| ATOM | 74  | C1'  | RU | 3 | 13.848 | -5.176  | -2.843 | 0.00 | 0.00 |
| ATOM | 75  | H1'  | RU | 3 | 14.668 | -5.447  | -2.217 | 0.00 | 0.00 |
| ATOM | 76  | N1   | RU | 3 | 13.455 | -3.816  | -2.505 | 0.00 | 0.00 |
| ATOM | 77  | C6   | RU | 3 | 12.935 | -2.974  | -3.413 | 0.00 | 0.00 |
| ATOM | 78  | H6   | RU | 3 | 12.826 | -3.289  | -4.408 | 0.00 | 0.00 |
| ATOM | 79  | C5   | RU | 3 | 12.560 | -1.753  | -3.060 | 0.00 | 0.00 |
| ATOM | 80  | H5   | RU | 3 | 12.164 | -1.101  | -3.775 | 0.00 | 0.00 |
| ATOM | 81  | C4   | RU | 3 | 12.678 | -1.290  | -1.733 | 0.00 | 0.00 |
| ATOM | 82  | O4   | RU | 3 | 12.367 | -0.206  | -1.345 | 0.00 | 0.00 |
| ATOM | 83  | N3   | RU | 3 | 13.189 | -2.182  | -0.883 | 0.00 | 0.00 |
| ATOM | 84  | H3   | RU | 3 | 13.284 | -1.901  | 0.048  | 0.00 | 0.00 |
| ATOM | 85  | C2   | RU | 3 | 13.567 | -3.431  | -1.197 | 0.00 | 0.00 |
| ATOM | 86  | O2   | RU | 3 | 13.964 | -4.155  | -0.333 | 0.00 | 0.00 |
| ATOM | 87  | C3'  | RU | 3 | 12.184 | -6.409  | -3.991 | 0.00 | 0.00 |
| ATOM | 88  | H3'  | RU | 3 | 11.531 | -5.630  | -4.287 | 0.00 | 0.00 |
| ATOM | 89  | C2'  | RU | 3 | 12.709 | -6.135  | -2.614 | 0.00 | 0.00 |
| ATOM | 90  | 1H2' | RU | 3 | 11.954 | -5.705  | -2.021 | 0.00 | 0.00 |
| ATOM | 91  | O2'  | RU | 3 | 13.221 | -7.258  | -2.010 | 0.00 | 0.00 |
| ATOM | 92  | 2HO' | RU | 3 | 12.649 | -7.811  | -2.002 | 0.00 | 0.00 |
| ATOM | 93  | O3'  | RU | 3 | 11.568 | -7.651  | -4.127 | 0.00 | 0.00 |
| ATOM | 94  | P    | RG | 4 | 10.106 | -7.902  | -3.640 | 0.00 | 0.00 |
| ATOM | 95  | O1P  | RG | 4 | 9.637  | -9.112  | -4.279 | 0.00 | 0.00 |
| ATOM | 96  | O2P  | RG | 4 | 9.353  | -6.684  | -3.825 | 0.00 | 0.00 |
| ATOM | 97  | O5'  | RG | 4 | 10.240 | -8.157  | -2.096 | 0.00 | 0.00 |
| ATOM | 98  | C5'  | RG | 4 | 10.739 | -9.345  | -1.565 | 0.00 | 0.00 |
| ATOM | 99  | 1H5' | RG | 4 | 11.749 | -9.488  | -1.882 | 0.00 | 0.00 |
| ATOM | 100 | 2H5' | RG | 4 | 10.162 | -10.160 | -1.935 | 0.00 | 0.00 |
| ATOM | 101 | C4'  | RG | 4 | 10.703 | -9.344  | -0.046 | 0.00 | 0.00 |
| ATOM | 102 | H4'  | RG | 4 | 11.106 | -10.274 | 0.297  | 0.00 | 0.00 |
| ATOM | 103 | O4'  | RG | 4 | 11.529 | -8.319  | 0.449  | 0.00 | 0.00 |
| ATOM | 104 | C1'  | RG | 4 | 10.918 | -7.679  | 1.539  | 0.00 | 0.00 |
| ATOM | 105 | H1'  | RG | 4 | 11.582 | -7.670  | 2.384  | 0.00 | 0.00 |
| ATOM | 106 | N9   | RG | 4 | 10.586 | -6.288  | 1.222  | 0.00 | 0.00 |
| ATOM | 107 | C8   | RG | 4 | 10.166 | -5.745  | 0.053  | 0.00 | 0.00 |
| ATOM | 108 | H8   | RG | 4 | 9.957  | -6.329  | -0.806 | 0.00 | 0.00 |
| ATOM | 109 | N7   | RG | 4 | 10.076 | -4.460  | 0.053  | 0.00 | 0.00 |
| ATOM | 110 | C5   | RG | 4 | 10.394 | -4.122  | 1.355  | 0.00 | 0.00 |
| ATOM | 111 | C6   | RG | 4 | 10.441 | -2.863  | 2.016  | 0.00 | 0.00 |
| ATOM | 112 | O6   | RG | 4 | 10.261 | -1.752  | 1.566  | 0.00 | 0.00 |
| ATOM | 113 | N1   | RG | 4 | 10.734 | -2.955  | 3.343  | 0.00 | 0.00 |
| ATOM | 114 | H1   | RG | 4 | 10.766 | -2.112  | 3.866  | 0.00 | 0.00 |
| ATOM | 115 | C2   | RG | 4 | 10.957 | -4.108  | 3.978  | 0.00 | 0.00 |
| ATOM | 116 | N2   | RG | 4 | 11.194 | -4.028  | 5.240  | 0.00 | 0.00 |
| ATOM | 117 | H21  | RG | 4 | 11.146 | -3.155  | 5.703  | 0.00 | 0.00 |
| ATOM | 118 | H22  | RG | 4 | 11.370 | -4.862  | 5.726  | 0.00 | 0.00 |
| ATOM | 119 | N3   | RG | 4 | 10.960 | -5.297  | 3.407  | 0.00 | 0.00 |
| ATOM | 120 | C4   | RG | 4 | 10.666 | -5.242  | 2.086  | 0.00 | 0.00 |
| ATOM | 121 | C3'  | RG | 4 | 9.335  | -9.176  | 0.590  | 0.00 | 0.00 |
| ATOM | 122 | H3'  | RG | 4 | 8.727  | -8.502  | 0.019  | 0.00 | 0.00 |
| ATOM | 123 | C2'  | RG | 4 | 9.696  | -8.483  | 1.888  | 0.00 | 0.00 |
| ATOM | 124 | 1H2' | RG | 4 | 8.898  | -7.857  | 2.215  | 0.00 | 0.00 |
| ATOM | 125 | O2'  | RG | 4 | 10.045 | -9.386  | 2.889  | 0.00 | 0.00 |
| ATOM | 126 | 2HO' | RG | 4 | 9.519  | -10.031 | 2.865  | 0.00 | 0.00 |
| ATOM | 127 | O3'  | RG | 4 | 8.647  | -10.355 | 0.917  | 0.00 | 0.00 |
| ATOM | 128 | P    | RA | 5 | 7.730  | -11.151 | -0.066 | 0.00 | 0.00 |

|      |     |      |    |   |        |         |        |      |      |
|------|-----|------|----|---|--------|---------|--------|------|------|
| ATOM | 129 | O1P  | RA | 5 | 7.026  | -12.116 | 0.751  | 0.00 | 0.00 |
| ATOM | 130 | O2P  | RA | 5 | 8.518  | -11.635 | -1.180 | 0.00 | 0.00 |
| ATOM | 131 | O5'  | RA | 5 | 6.654  | -10.134 | -0.572 | 0.00 | 0.00 |
| ATOM | 132 | C5'  | RA | 5 | 6.818  | -9.366  | -1.729 | 0.00 | 0.00 |
| ATOM | 133 | 1H5' | RA | 5 | 6.631  | -9.947  | -2.578 | 0.00 | 0.00 |
| ATOM | 134 | 2H5' | RA | 5 | 7.795  | -9.002  | -1.806 | 0.00 | 0.00 |
| ATOM | 135 | C4'  | RA | 5 | 5.879  | -8.227  | -1.720 | 0.00 | 0.00 |
| ATOM | 136 | H4'  | RA | 5 | 4.904  | -8.607  | -1.652 | 0.00 | 0.00 |
| ATOM | 137 | O4'  | RA | 5 | 6.108  | -7.416  | -0.636 | 0.00 | 0.00 |
| ATOM | 138 | C1'  | RA | 5 | 5.752  | -6.120  | -0.949 | 0.00 | 0.00 |
| ATOM | 139 | H1'  | RA | 5 | 4.693  | -6.049  | -0.971 | 0.00 | 0.00 |
| ATOM | 140 | N9   | RA | 5 | 6.271  | -5.091  | -0.035 | 0.00 | 0.00 |
| ATOM | 141 | C8   | RA | 5 | 6.359  | -3.766  | -0.270 | 0.00 | 0.00 |
| ATOM | 142 | H8   | RA | 5 | 6.142  | -3.348  | -1.213 | 0.00 | 0.00 |
| ATOM | 143 | N7   | RA | 5 | 6.711  | -3.053  | 0.738  | 0.00 | 0.00 |
| ATOM | 144 | C5   | RA | 5 | 6.867  | -3.983  | 1.734  | 0.00 | 0.00 |
| ATOM | 145 | C6   | RA | 5 | 7.194  | -3.923  | 3.088  | 0.00 | 0.00 |
| ATOM | 146 | N6   | RA | 5 | 7.452  | -2.849  | 3.754  | 0.00 | 0.00 |
| ATOM | 147 | H61  | RA | 5 | 7.667  | -2.933  | 4.705  | 0.00 | 0.00 |
| ATOM | 148 | H62  | RA | 5 | 7.413  | -1.989  | 3.303  | 0.00 | 0.00 |
| ATOM | 149 | N1   | RA | 5 | 7.252  | -4.998  | 3.822  | 0.00 | 0.00 |
| ATOM | 150 | C2   | RA | 5 | 6.976  | -6.128  | 3.242  | 0.00 | 0.00 |
| ATOM | 151 | H2   | RA | 5 | 7.026  | -6.980  | 3.856  | 0.00 | 0.00 |
| ATOM | 152 | N3   | RA | 5 | 6.649  | -6.346  | 1.997  | 0.00 | 0.00 |
| ATOM | 153 | C4   | RA | 5 | 6.611  | -5.225  | 1.276  | 0.00 | 0.00 |
| ATOM | 154 | C3'  | RA | 5 | 5.990  | -7.359  | -2.955 | 0.00 | 0.00 |
| ATOM | 155 | H3'  | RA | 5 | 6.822  | -7.679  | -3.555 | 0.00 | 0.00 |
| ATOM | 156 | C2'  | RA | 5 | 6.269  | -5.995  | -2.341 | 0.00 | 0.00 |
| ATOM | 157 | 1H2' | RA | 5 | 7.316  | -5.860  | -2.289 | 0.00 | 0.00 |
| ATOM | 158 | O2'  | RA | 5 | 5.695  | -4.930  | -2.988 | 0.00 | 0.00 |
| ATOM | 159 | 2HO' | RA | 5 | 4.959  | -5.211  | -3.421 | 0.00 | 0.00 |
| ATOM | 160 | O3'  | RA | 5 | 4.779  | -7.462  | -3.659 | 0.00 | 0.00 |
| ATOM | 161 | P    | RA | 6 | 4.631  | -7.050  | -5.157 | 0.00 | 0.00 |
| ATOM | 162 | O1P  | RA | 6 | 3.646  | -7.910  | -5.767 | 0.00 | 0.00 |
| ATOM | 163 | O2P  | RA | 6 | 5.952  | -6.966  | -5.742 | 0.00 | 0.00 |
| ATOM | 164 | O5'  | RA | 6 | 4.050  | -5.599  | -5.090 | 0.00 | 0.00 |
| ATOM | 165 | C5'  | RA | 6 | 2.681  | -5.311  | -5.015 | 0.00 | 0.00 |
| ATOM | 166 | 1H5' | RA | 6 | 2.192  | -5.686  | -5.884 | 0.00 | 0.00 |
| ATOM | 167 | 2H5' | RA | 6 | 2.569  | -4.254  | -5.016 | 0.00 | 0.00 |
| ATOM | 168 | C4'  | RA | 6 | 1.979  | -5.860  | -3.797 | 0.00 | 0.00 |
| ATOM | 169 | H4'  | RA | 6 | 1.995  | -6.925  | -3.835 | 0.00 | 0.00 |
| ATOM | 170 | O4'  | RA | 6 | 2.604  | -5.406  | -2.615 | 0.00 | 0.00 |
| ATOM | 171 | C1'  | RA | 6 | 1.635  | -4.850  | -1.780 | 0.00 | 0.00 |
| ATOM | 172 | H1'  | RA | 6 | 1.157  | -5.633  | -1.231 | 0.00 | 0.00 |
| ATOM | 173 | N9   | RA | 6 | 2.216  | -3.897  | -0.824 | 0.00 | 0.00 |
| ATOM | 174 | C8   | RA | 6 | 2.267  | -2.550  | -0.870 | 0.00 | 0.00 |
| ATOM | 175 | H8   | RA | 6 | 1.932  | -2.003  | -1.711 | 0.00 | 0.00 |
| ATOM | 176 | N7   | RA | 6 | 2.756  | -1.989  | 0.190  | 0.00 | 0.00 |
| ATOM | 177 | C5   | RA | 6 | 3.029  | -3.058  | 1.015  | 0.00 | 0.00 |
| ATOM | 178 | C6   | RA | 6 | 3.525  | -3.210  | 2.316  | 0.00 | 0.00 |
| ATOM | 179 | N6   | RA | 6 | 3.892  | -2.246  | 3.104  | 0.00 | 0.00 |
| ATOM | 180 | H61  | RA | 6 | 4.195  | -2.472  | 4.008  | 0.00 | 0.00 |
| ATOM | 181 | H62  | RA | 6 | 3.862  | -1.324  | 2.786  | 0.00 | 0.00 |
| ATOM | 182 | N1   | RA | 6 | 3.635  | -4.394  | 2.865  | 0.00 | 0.00 |
| ATOM | 183 | C2   | RA | 6 | 3.292  | -5.431  | 2.145  | 0.00 | 0.00 |
| ATOM | 184 | H2   | RA | 6 | 3.403  | -6.374  | 2.609  | 0.00 | 0.00 |
| ATOM | 185 | N3   | RA | 6 | 2.816  | -5.453  | 0.919  | 0.00 | 0.00 |
| ATOM | 186 | C4   | RA | 6 | 2.704  | -4.220  | 0.404  | 0.00 | 0.00 |
| ATOM | 187 | C3'  | RA | 6 | 0.534  | -5.382  | -3.753 | 0.00 | 0.00 |
| ATOM | 188 | H3'  | RA | 6 | 0.198  | -5.008  | -4.703 | 0.00 | 0.00 |
| ATOM | 189 | C2'  | RA | 6 | 0.632  | -4.260  | -2.739 | 0.00 | 0.00 |
| ATOM | 190 | 1H2' | RA | 6 | 1.048  | -3.396  | -3.214 | 0.00 | 0.00 |
| ATOM | 191 | O2'  | RA | 6 | -0.586 | -3.945  | -2.135 | 0.00 | 0.00 |
| ATOM | 192 | 2HO' | RA | 6 | -0.963 | -4.587  | -1.925 | 0.00 | 0.00 |
| ATOM | 193 | O3'  | RA | 6 | -0.321 | -6.384  | -3.266 | 0.00 | 0.00 |
| ATOM | 194 | P    | RG | 7 | -1.114 | -7.312  | -4.251 | 0.00 | 0.00 |
| ATOM | 195 | O1P  | RG | 7 | -1.931 | -8.212  | -3.465 | 0.00 | 0.00 |
| ATOM | 196 | O2P  | RG | 7 | -0.185 | -7.868  | -5.208 | 0.00 | 0.00 |

|      |     |      |    |   |        |        |         |      |      |
|------|-----|------|----|---|--------|--------|---------|------|------|
| ATOM | 197 | O5'  | RG | 7 | -2.058 | -6.328 | -5.024  | 0.00 | 0.00 |
| ATOM | 198 | C5'  | RG | 7 | -3.079 | -5.635 | -4.387  | 0.00 | 0.00 |
| ATOM | 199 | 1H5' | RG | 7 | -2.704 | -5.145 | -3.525  | 0.00 | 0.00 |
| ATOM | 200 | 2H5' | RG | 7 | -3.836 | -6.314 | -4.092  | 0.00 | 0.00 |
| ATOM | 201 | C4'  | RG | 7 | -3.686 | -4.614 | -5.303  | 0.00 | 0.00 |
| ATOM | 202 | H4'  | RG | 7 | -3.967 | -5.086 | -6.215  | 0.00 | 0.00 |
| ATOM | 203 | O4'  | RG | 7 | -4.815 | -4.063 | -4.701  | 0.00 | 0.00 |
| ATOM | 204 | C1'  | RG | 7 | -5.015 | -2.764 | -5.202  | 0.00 | 0.00 |
| ATOM | 205 | H1'  | RG | 7 | -5.916 | -2.724 | -5.781  | 0.00 | 0.00 |
| ATOM | 206 | N9   | RG | 7 | -5.123 | -1.773 | -4.123  | 0.00 | 0.00 |
| ATOM | 207 | C8   | RG | 7 | -4.810 | -1.893 | -2.806  | 0.00 | 0.00 |
| ATOM | 208 | H8   | RG | 7 | -4.421 | -2.797 | -2.399  | 0.00 | 0.00 |
| ATOM | 209 | N7   | RG | 7 | -5.040 | -0.830 | -2.097  | 0.00 | 0.00 |
| ATOM | 210 | C5   | RG | 7 | -5.563 | 0.068  | -3.018  | 0.00 | 0.00 |
| ATOM | 211 | C6   | RG | 7 | -6.044 | 1.408  | -2.882  | 0.00 | 0.00 |
| ATOM | 212 | O6   | RG | 7 | -6.138 | 2.103  | -1.884  | 0.00 | 0.00 |
| ATOM | 213 | N1   | RG | 7 | -6.440 | 1.967  | -4.067  | 0.00 | 0.00 |
| ATOM | 214 | H1   | RG | 7 | -6.768 | 2.904  | -4.048  | 0.00 | 0.00 |
| ATOM | 215 | C2   | RG | 7 | -6.400 | 1.322  | -5.245  | 0.00 | 0.00 |
| ATOM | 216 | N2   | RG | 7 | -6.754 | 1.988  | -6.292  | 0.00 | 0.00 |
| ATOM | 217 | H21  | RG | 7 | -7.038 | 2.935  | -6.207  | 0.00 | 0.00 |
| ATOM | 218 | H22  | RG | 7 | -6.741 | 1.520  | -7.163  | 0.00 | 0.00 |
| ATOM | 219 | N3   | RG | 7 | -5.985 | 0.083  | -5.422  | 0.00 | 0.00 |
| ATOM | 220 | C4   | RG | 7 | -5.585 | -0.499 | -4.264  | 0.00 | 0.00 |
| ATOM | 221 | C3'  | RG | 7 | -2.800 | -3.436 | -5.633  | 0.00 | 0.00 |
| ATOM | 222 | H3'  | RG | 7 | -2.361 | -3.091 | -4.722  | 0.00 | 0.00 |
| ATOM | 223 | C2'  | RG | 7 | -3.838 | -2.452 | -6.100  | 0.00 | 0.00 |
| ATOM | 224 | 1H2' | RG | 7 | -3.496 | -1.457 | -5.965  | 0.00 | 0.00 |
| ATOM | 225 | O2'  | RG | 7 | -4.215 | -2.671 | -7.420  | 0.00 | 0.00 |
| ATOM | 226 | 2HO' | RG | 7 | -3.759 | -2.618 | -7.833  | 0.00 | 0.00 |
| ATOM | 227 | O3'  | RG | 7 | -1.822 | -3.685 | -6.607  | 0.00 | 0.00 |
| ATOM | 228 | P    | RU | 8 | -0.608 | -2.707 | -6.823  | 0.00 | 0.00 |
| ATOM | 229 | O1P  | RU | 8 | 0.302  | -3.335 | -7.758  | 0.00 | 0.00 |
| ATOM | 230 | O2P  | RU | 8 | -0.101 | -2.277 | -5.533  | 0.00 | 0.00 |
| ATOM | 231 | O5'  | RU | 8 | -1.214 | -1.434 | -7.511  | 0.00 | 0.00 |
| ATOM | 232 | C5'  | RU | 8 | -1.551 | -1.397 | -8.866  | 0.00 | 0.00 |
| ATOM | 233 | 1H5' | RU | 8 | -2.289 | -2.142 | -9.082  | 0.00 | 0.00 |
| ATOM | 234 | 2H5' | RU | 8 | -0.687 | -1.606 | -9.453  | 0.00 | 0.00 |
| ATOM | 235 | C4'  | RU | 8 | -2.081 | -0.034 | -9.261  | 0.00 | 0.00 |
| ATOM | 236 | H4'  | RU | 8 | -2.329 | -0.066 | -10.305 | 0.00 | 0.00 |
| ATOM | 237 | O4'  | RU | 8 | -3.230 | 0.341  | -8.541  | 0.00 | 0.00 |
| ATOM | 238 | C1'  | RU | 8 | -3.222 | 1.747  | -8.353  | 0.00 | 0.00 |
| ATOM | 239 | H1'  | RU | 8 | -4.107 | 2.172  | -8.790  | 0.00 | 0.00 |
| ATOM | 240 | N1   | RU | 8 | -3.176 | 2.132  | -6.921  | 0.00 | 0.00 |
| ATOM | 241 | C6   | RU | 8 | -2.675 | 1.302  | -5.963  | 0.00 | 0.00 |
| ATOM | 242 | H6   | RU | 8 | -2.282 | 0.356  | -6.245  | 0.00 | 0.00 |
| ATOM | 243 | C5   | RU | 8 | -2.676 | 1.663  | -4.665  | 0.00 | 0.00 |
| ATOM | 244 | H5   | RU | 8 | -2.289 | 1.006  | -3.926  | 0.00 | 0.00 |
| ATOM | 245 | C4   | RU | 8 | -3.183 | 2.922  | -4.236  | 0.00 | 0.00 |
| ATOM | 246 | O4   | RU | 8 | -3.235 | 3.307  | -3.089  | 0.00 | 0.00 |
| ATOM | 247 | N3   | RU | 8 | -3.642 | 3.707  | -5.241  | 0.00 | 0.00 |
| ATOM | 248 | H3   | RU | 8 | -3.977 | 4.604  | -4.981  | 0.00 | 0.00 |
| ATOM | 249 | C2   | RU | 8 | -3.645 | 3.387  | -6.567  | 0.00 | 0.00 |
| ATOM | 250 | O2   | RU | 8 | -4.035 | 4.205  | -7.374  | 0.00 | 0.00 |
| ATOM | 251 | C3'  | RU | 8 | -1.087 | 1.088  | -9.049  | 0.00 | 0.00 |
| ATOM | 252 | H3'  | RU | 8 | -0.671 | 1.010  | -8.064  | 0.00 | 0.00 |
| ATOM | 253 | C2'  | RU | 8 | -2.011 | 2.279  | -9.095  | 0.00 | 0.00 |
| ATOM | 254 | 1H2' | RU | 8 | -1.573 | 3.126  | -8.601  | 0.00 | 0.00 |
| ATOM | 255 | O2'  | RU | 8 | -2.392 | 2.615  | -10.401 | 0.00 | 0.00 |
| ATOM | 256 | 2HO' | RU | 8 | -1.949 | 2.631  | -10.852 | 0.00 | 0.00 |
| ATOM | 257 | O3'  | RU | 8 | -0.083 | 1.130  | -10.016 | 0.00 | 0.00 |
| ATOM | 258 | P    | RG | 9 | 1.318  | 1.739  | -9.691  | 0.00 | 0.00 |
| ATOM | 259 | O1P  | RG | 9 | 2.144  | 1.570  | -10.860 | 0.00 | 0.00 |
| ATOM | 260 | O2P  | RG | 9 | 1.764  | 1.196  | -8.433  | 0.00 | 0.00 |
| ATOM | 261 | O5'  | RG | 9 | 1.071  | 3.268  | -9.482  | 0.00 | 0.00 |
| ATOM | 262 | C5'  | RG | 9 | 0.815  | 4.117  | -10.555 | 0.00 | 0.00 |
| ATOM | 263 | 1H5' | RG | 9 | -0.014 | 3.750  | -11.118 | 0.00 | 0.00 |
| ATOM | 264 | 2H5' | RG | 9 | 1.667  | 4.150  | -11.191 | 0.00 | 0.00 |

|      |     |      |    |    |        |        |         |      |      |
|------|-----|------|----|----|--------|--------|---------|------|------|
| ATOM | 265 | C4'  | RG | 9  | 0.517  | 5.522  | -10.099 | 0.00 | 0.00 |
| ATOM | 266 | H4'  | RG | 9  | 0.339  | 6.119  | -10.968 | 0.00 | 0.00 |
| ATOM | 267 | O4'  | RG | 9  | -0.622 | 5.581  | -9.284  | 0.00 | 0.00 |
| ATOM | 268 | C1'  | RG | 9  | -0.459 | 6.636  | -8.358  | 0.00 | 0.00 |
| ATOM | 269 | H1'  | RG | 9  | -1.239 | 7.365  | -8.482  | 0.00 | 0.00 |
| ATOM | 270 | N9   | RG | 9  | -0.518 | 6.135  | -6.977  | 0.00 | 0.00 |
| ATOM | 271 | C8   | RG | 9  | -0.276 | 4.884  | -6.501  | 0.00 | 0.00 |
| ATOM | 272 | H8   | RG | 9  | 0.016  | 4.079  | -7.136  | 0.00 | 0.00 |
| ATOM | 273 | N7   | RG | 9  | -0.450 | 4.755  | -5.225  | 0.00 | 0.00 |
| ATOM | 274 | C5   | RG | 9  | -0.805 | 6.031  | -4.809  | 0.00 | 0.00 |
| ATOM | 275 | C6   | RG | 9  | -1.120 | 6.561  | -3.518  | 0.00 | 0.00 |
| ATOM | 276 | O6   | RG | 9  | -1.197 | 5.989  | -2.444  | 0.00 | 0.00 |
| ATOM | 277 | N1   | RG | 9  | -1.355 | 7.908  | -3.526  | 0.00 | 0.00 |
| ATOM | 278 | H1   | RG | 9  | -1.555 | 8.345  | -2.657  | 0.00 | 0.00 |
| ATOM | 279 | C2   | RG | 9  | -1.324 | 8.663  | -4.634  | 0.00 | 0.00 |
| ATOM | 280 | N2   | RG | 9  | -1.548 | 9.919  | -4.487  | 0.00 | 0.00 |
| ATOM | 281 | H21  | RG | 9  | -1.706 | 10.291 | -3.582  | 0.00 | 0.00 |
| ATOM | 282 | H22  | RG | 9  | -1.532 | 10.490 | -5.287  | 0.00 | 0.00 |
| ATOM | 283 | N3   | RG | 9  | -1.075 | 8.217  | -5.852  | 0.00 | 0.00 |
| ATOM | 284 | C4   | RG | 9  | -0.819 | 6.885  | -5.878  | 0.00 | 0.00 |
| ATOM | 285 | C3'  | RG | 9  | 1.638  | 6.167  | -9.317  | 0.00 | 0.00 |
| ATOM | 286 | H3'  | RG | 9  | 1.980  | 5.481  | -8.574  | 0.00 | 0.00 |
| ATOM | 287 | C2'  | RG | 9  | 0.882  | 7.288  | -8.645  | 0.00 | 0.00 |
| ATOM | 288 | 1H2' | RG | 9  | 1.369  | 7.598  | -7.746  | 0.00 | 0.00 |
| ATOM | 289 | O2'  | RG | 9  | 0.673  | 8.373  | -9.498  | 0.00 | 0.00 |
| ATOM | 290 | 2HO' | RG | 9  | 1.041  | 8.686  | -9.624  | 0.00 | 0.00 |
| ATOM | 291 | O3'  | RG | 9  | 2.690  | 6.607  | -10.132 | 0.00 | 0.00 |
| ATOM | 292 | P    | RC | 10 | 4.140  | 6.748  | -9.581  | 0.00 | 0.00 |
| ATOM | 293 | O1P  | RC | 10 | 4.988  | 7.131  | -10.689 | 0.00 | 0.00 |
| ATOM | 294 | O2P  | RC | 10 | 4.460  | 5.551  | -8.837  | 0.00 | 0.00 |
| ATOM | 295 | O5'  | RC | 10 | 4.090  | 7.940  | -8.570  | 0.00 | 0.00 |
| ATOM | 296 | C5'  | RC | 10 | 4.005  | 9.268  | -8.998  | 0.00 | 0.00 |
| ATOM | 297 | 1H5' | RC | 10 | 3.190  | 9.379  | -9.679  | 0.00 | 0.00 |
| ATOM | 298 | 2H5' | RC | 10 | 4.907  | 9.544  | -9.500  | 0.00 | 0.00 |
| ATOM | 299 | C4'  | RC | 10 | 3.800  | 10.218 | -7.838  | 0.00 | 0.00 |
| ATOM | 300 | H4'  | RC | 10 | 3.740  | 11.215 | -8.229  | 0.00 | 0.00 |
| ATOM | 301 | O4'  | RC | 10 | 2.612  | 9.940  | -7.136  | 0.00 | 0.00 |
| ATOM | 302 | C1'  | RC | 10 | 2.781  | 10.310 | -5.784  | 0.00 | 0.00 |
| ATOM | 303 | H1'  | RC | 10 | 2.096  | 11.103 | -5.545  | 0.00 | 0.00 |
| ATOM | 304 | N1   | RC | 10 | 2.541  | 9.175  | -4.860  | 0.00 | 0.00 |
| ATOM | 305 | C6   | RC | 10 | 2.835  | 7.892  | -5.189  | 0.00 | 0.00 |
| ATOM | 306 | H6   | RC | 10 | 3.208  | 7.671  | -6.157  | 0.00 | 0.00 |
| ATOM | 307 | C5   | RC | 10 | 2.646  | 6.903  | -4.298  | 0.00 | 0.00 |
| ATOM | 308 | H5   | RC | 10 | 2.867  | 5.900  | -4.562  | 0.00 | 0.00 |
| ATOM | 309 | C4   | RC | 10 | 2.154  | 7.248  | -3.035  | 0.00 | 0.00 |
| ATOM | 310 | N4   | RC | 10 | 1.944  | 6.343  | -2.145  | 0.00 | 0.00 |
| ATOM | 311 | H41  | RC | 10 | 1.546  | 6.617  | -1.284  | 0.00 | 0.00 |
| ATOM | 312 | H42  | RC | 10 | 2.127  | 5.406  | -2.359  | 0.00 | 0.00 |
| ATOM | 313 | N3   | RC | 10 | 1.877  | 8.471  | -2.692  | 0.00 | 0.00 |
| ATOM | 314 | C2   | RC | 10 | 2.076  | 9.449  | -3.590  | 0.00 | 0.00 |
| ATOM | 315 | O2   | RC | 10 | 1.848  | 10.585 | -3.240  | 0.00 | 0.00 |
| ATOM | 316 | C3'  | RC | 10 | 4.903  | 10.184 | -6.809  | 0.00 | 0.00 |
| ATOM | 317 | H3'  | RC | 10 | 5.118  | 9.164  | -6.565  | 0.00 | 0.00 |
| ATOM | 318 | C2'  | RC | 10 | 4.198  | 10.834 | -5.640  | 0.00 | 0.00 |
| ATOM | 319 | 1H2' | RC | 10 | 4.639  | 10.537 | -4.713  | 0.00 | 0.00 |
| ATOM | 320 | O2'  | RC | 10 | 4.161  | 12.224 | -5.746  | 0.00 | 0.00 |
| ATOM | 321 | 2HO' | RC | 10 | 4.707  | 12.502 | -5.803  | 0.00 | 0.00 |
| ATOM | 322 | O3'  | RC | 10 | 6.060  | 10.866 | -7.214  | 0.00 | 0.00 |
| ATOM | 323 | P    | RA | 11 | 7.448  | 10.531 | -6.589  | 0.00 | 0.00 |
| ATOM | 324 | O1P  | RA | 11 | 8.441  | 11.314 | -7.297  | 0.00 | 0.00 |
| ATOM | 325 | O2P  | RA | 11 | 7.586  | 9.095  | -6.547  | 0.00 | 0.00 |
| ATOM | 326 | O5'  | RA | 11 | 7.375  | 11.042 | -5.112  | 0.00 | 0.00 |
| ATOM | 327 | C5'  | RA | 11 | 7.490  | 12.396 | -4.796  | 0.00 | 0.00 |
| ATOM | 328 | 1H5' | RA | 11 | 6.787  | 12.959 | -5.366  | 0.00 | 0.00 |
| ATOM | 329 | 2H5' | RA | 11 | 8.471  | 12.738 | -5.036  | 0.00 | 0.00 |
| ATOM | 330 | C4'  | RA | 11 | 7.246  | 12.648 | -3.328  | 0.00 | 0.00 |
| ATOM | 331 | H4'  | RA | 11 | 7.333  | 13.701 | -3.158  | 0.00 | 0.00 |
| ATOM | 332 | O4'  | RA | 11 | 5.964  | 12.235 | -2.930  | 0.00 | 0.00 |

|      |     |      |    |    |        |        |        |      |      |
|------|-----|------|----|----|--------|--------|--------|------|------|
| ATOM | 333 | C1'  | RA | 11 | 6.021  | 11.795 | -1.591 | 0.00 | 0.00 |
| ATOM | 334 | H1'  | RA | 11 | 5.368  | 12.381 | -0.981 | 0.00 | 0.00 |
| ATOM | 335 | N9   | RA | 11 | 5.630  | 10.387 | -1.474 | 0.00 | 0.00 |
| ATOM | 336 | C8   | RA | 11 | 5.784  | 9.369  | -2.359 | 0.00 | 0.00 |
| ATOM | 337 | H8   | RA | 11 | 6.231  | 9.507  | -3.313 | 0.00 | 0.00 |
| ATOM | 338 | N7   | RA | 11 | 5.342  | 8.224  | -1.948 | 0.00 | 0.00 |
| ATOM | 339 | C5   | RA | 11 | 4.877  | 8.509  | -0.672 | 0.00 | 0.00 |
| ATOM | 340 | C6   | RA | 11 | 4.287  | 7.769  | 0.365  | 0.00 | 0.00 |
| ATOM | 341 | N6   | RA | 11 | 3.984  | 6.503  | 0.321  | 0.00 | 0.00 |
| ATOM | 342 | H61  | RA | 11 | 3.565  | 6.094  | 1.116  | 0.00 | 0.00 |
| ATOM | 343 | H62  | RA | 11 | 4.151  | 5.996  | -0.505 | 0.00 | 0.00 |
| ATOM | 344 | N1   | RA | 11 | 3.997  | 8.331  | 1.522  | 0.00 | 0.00 |
| ATOM | 345 | C2   | RA | 11 | 4.255  | 9.609  | 1.667  | 0.00 | 0.00 |
| ATOM | 346 | H2   | RA | 11 | 4.003  | 10.027 | 2.608  | 0.00 | 0.00 |
| ATOM | 347 | N3   | RA | 11 | 4.781  | 10.436 | 0.790  | 0.00 | 0.00 |
| ATOM | 348 | C4   | RA | 11 | 5.072  | 9.817  | -0.372 | 0.00 | 0.00 |
| ATOM | 349 | C3'  | RA | 11 | 8.223  | 11.953 | -2.408 | 0.00 | 0.00 |
| ATOM | 350 | H3'  | RA | 11 | 8.340  | 10.939 | -2.728 | 0.00 | 0.00 |
| ATOM | 351 | C2'  | RA | 11 | 7.440  | 11.983 | -1.118 | 0.00 | 0.00 |
| ATOM | 352 | 1H2' | RA | 11 | 7.738  | 11.186 | -0.471 | 0.00 | 0.00 |
| ATOM | 353 | O2'  | RA | 11 | 7.538  | 13.205 | -0.460 | 0.00 | 0.00 |
| ATOM | 354 | 2HO' | RA | 11 | 8.270  | 13.335 | -0.294 | 0.00 | 0.00 |
| ATOM | 355 | O3'  | RA | 11 | 9.461  | 12.603 | -2.325 | 0.00 | 0.00 |
| ATOM | 356 | P    | RC | 12 | 10.713 | 11.889 | -1.748 | 0.00 | 0.00 |
| ATOM | 357 | O1P  | RC | 12 | 11.803 | 12.824 | -1.795 | 0.00 | 0.00 |
| ATOM | 358 | O2P  | RC | 12 | 10.847 | 10.615 | -2.405 | 0.00 | 0.00 |
| ATOM | 359 | O5'  | RC | 12 | 10.359 | 11.656 | -0.257 | 0.00 | 0.00 |
| ATOM | 360 | C5'  | RC | 12 | 10.612 | 10.967 | 0.548  | 0.00 | 0.00 |
| ATOM | 361 | 1H5' | RC | 12 | 11.288 | 11.161 | 0.654  | 0.00 | 0.00 |
| ATOM | 362 | 2H5' | RC | 12 | 10.646 | 10.364 | 0.161  | 0.00 | 0.00 |
| ATOM | 363 | C4'  | RC | 12 | 9.904  | 10.814 | 1.841  | 0.00 | 0.00 |
| ATOM | 364 | H4'  | RC | 12 | 9.942  | 11.737 | 2.353  | 0.00 | 0.00 |
| ATOM | 365 | O4'  | RC | 12 | 8.575  | 10.421 | 1.659  | 0.00 | 0.00 |
| ATOM | 366 | C1'  | RC | 12 | 8.176  | 9.605  | 2.718  | 0.00 | 0.00 |
| ATOM | 367 | H1'  | RC | 12 | 7.370  | 10.056 | 3.232  | 0.00 | 0.00 |
| ATOM | 368 | N1   | RC | 12 | 7.741  | 8.269  | 2.268  | 0.00 | 0.00 |
| ATOM | 369 | C6   | RC | 12 | 7.997  | 7.802  | 1.027  | 0.00 | 0.00 |
| ATOM | 370 | H6   | RC | 12 | 8.506  | 8.412  | 0.329  | 0.00 | 0.00 |
| ATOM | 371 | C5   | RC | 12 | 7.608  | 6.572  | 0.676  | 0.00 | 0.00 |
| ATOM | 372 | H5   | RC | 12 | 7.804  | 6.211  | -0.299 | 0.00 | 0.00 |
| ATOM | 373 | C4   | RC | 12 | 6.933  | 5.809  | 1.627  | 0.00 | 0.00 |
| ATOM | 374 | N4   | RC | 12 | 6.518  | 4.633  | 1.343  | 0.00 | 0.00 |
| ATOM | 375 | H41  | RC | 12 | 6.024  | 4.140  | 2.034  | 0.00 | 0.00 |
| ATOM | 376 | H42  | RC | 12 | 6.664  | 4.275  | 0.445  | 0.00 | 0.00 |
| ATOM | 377 | N3   | RC | 12 | 6.679  | 6.234  | 2.822  | 0.00 | 0.00 |
| ATOM | 378 | C2   | RC | 12 | 7.065  | 7.467  | 3.160  | 0.00 | 0.00 |
| ATOM | 379 | O2   | RC | 12 | 6.823  | 7.840  | 4.282  | 0.00 | 0.00 |
| ATOM | 380 | C3'  | RC | 12 | 10.504 | 9.780  | 2.727  | 0.00 | 0.00 |
| ATOM | 381 | H3'  | RC | 12 | 10.681 | 8.906  | 2.158  | 0.00 | 0.00 |
| ATOM | 382 | C2'  | RC | 12 | 9.359  | 9.529  | 3.651  | 0.00 | 0.00 |
| ATOM | 383 | 1H2' | RC | 12 | 9.438  | 8.576  | 4.108  | 0.00 | 0.00 |
| ATOM | 384 | O2'  | RC | 12 | 9.233  | 10.524 | 4.613  | 0.00 | 0.00 |
| ATOM | 385 | 2HO' | RC | 12 | 9.630  | 10.681 | 4.929  | 0.00 | 0.00 |
| ATOM | 386 | O3'  | RC | 12 | 11.648 | 10.214 | 3.397  | 0.00 | 0.00 |
| ATOM | 387 | P    | RA | 13 | 12.759 | 9.222  | 3.805  | 0.00 | 0.00 |
| ATOM | 388 | O1P  | RA | 13 | 13.740 | 9.961  | 4.554  | 0.00 | 0.00 |
| ATOM | 389 | O2P  | RA | 13 | 13.164 | 8.525  | 2.627  | 0.00 | 0.00 |
| ATOM | 390 | O5'  | RA | 13 | 12.097 | 8.181  | 4.750  | 0.00 | 0.00 |
| ATOM | 391 | C5'  | RA | 13 | 11.752 | 8.500  | 6.049  | 0.00 | 0.00 |
| ATOM | 392 | 1H5' | RA | 13 | 11.118 | 9.346  | 6.050  | 0.00 | 0.00 |
| ATOM | 393 | 2H5' | RA | 13 | 12.626 | 8.737  | 6.604  | 0.00 | 0.00 |
| ATOM | 394 | C4'  | RA | 13 | 11.048 | 7.364  | 6.732  | 0.00 | 0.00 |
| ATOM | 395 | H4'  | RA | 13 | 10.777 | 7.684  | 7.707  | 0.00 | 0.00 |
| ATOM | 396 | O4'  | RA | 13 | 9.879  | 6.973  | 6.053  | 0.00 | 0.00 |
| ATOM | 397 | C1'  | RA | 13 | 9.717  | 5.596  | 6.189  | 0.00 | 0.00 |
| ATOM | 398 | H1'  | RA | 13 | 8.787  | 5.380  | 6.657  | 0.00 | 0.00 |
| ATOM | 399 | N9   | RA | 13 | 9.721  | 4.948  | 4.886  | 0.00 | 0.00 |
| ATOM | 400 | C8   | RA | 13 | 10.239 | 5.381  | 3.725  | 0.00 | 0.00 |

|      |     |      |    |    |        |        |        |      |      |
|------|-----|------|----|----|--------|--------|--------|------|------|
| ATOM | 401 | H8   | RA | 13 | 10.754 | 6.295  | 3.648  | 0.00 | 0.00 |
| ATOM | 402 | N7   | RA | 13 | 10.056 | 4.589  | 2.730  | 0.00 | 0.00 |
| ATOM | 403 | C5   | RA | 13 | 9.351  | 3.550  | 3.286  | 0.00 | 0.00 |
| ATOM | 404 | C6   | RA | 13 | 8.803  | 2.362  | 2.812  | 0.00 | 0.00 |
| ATOM | 405 | N6   | RA | 13 | 8.839  | 1.958  | 1.590  | 0.00 | 0.00 |
| ATOM | 406 | H61  | RA | 13 | 8.457  | 1.087  | 1.386  | 0.00 | 0.00 |
| ATOM | 407 | H62  | RA | 13 | 9.281  | 2.505  | 0.920  | 0.00 | 0.00 |
| ATOM | 408 | N1   | RA | 13 | 8.191  | 1.535  | 3.607  | 0.00 | 0.00 |
| ATOM | 409 | C2   | RA | 13 | 8.112  | 1.860  | 4.862  | 0.00 | 0.00 |
| ATOM | 410 | H2   | RA | 13 | 7.615  | 1.173  | 5.481  | 0.00 | 0.00 |
| ATOM | 411 | N3   | RA | 13 | 8.558  | 2.933  | 5.454  | 0.00 | 0.00 |
| ATOM | 412 | C4   | RA | 13 | 9.167  | 3.751  | 4.599  | 0.00 | 0.00 |
| ATOM | 413 | C3'  | RA | 13 | 11.899 | 6.142  | 6.889  | 0.00 | 0.00 |
| ATOM | 414 | H3'  | RA | 13 | 12.415 | 5.965  | 5.987  | 0.00 | 0.00 |
| ATOM | 415 | C2'  | RA | 13 | 10.844 | 5.096  | 7.066  | 0.00 | 0.00 |
| ATOM | 416 | 1H2' | RA | 13 | 11.192 | 4.154  | 6.748  | 0.00 | 0.00 |
| ATOM | 417 | O2'  | RA | 13 | 10.391 | 5.025  | 8.364  | 0.00 | 0.00 |
| ATOM | 418 | 2HO' | RA | 13 | 10.861 | 4.952  | 8.809  | 0.00 | 0.00 |
| ATOM | 419 | O3'  | RA | 13 | 12.780 | 6.241  | 7.970  | 0.00 | 0.00 |
| ATOM | 420 | P    | RC | 14 | 14.053 | 5.362  | 8.079  | 0.00 | 0.00 |
| ATOM | 421 | O1P  | RC | 14 | 14.828 | 5.851  | 9.203  | 0.00 | 0.00 |
| ATOM | 422 | O2P  | RC | 14 | 14.672 | 5.296  | 6.778  | 0.00 | 0.00 |
| ATOM | 423 | O5'  | RC | 14 | 13.542 | 3.928  | 8.419  | 0.00 | 0.00 |
| ATOM | 424 | C5'  | RC | 14 | 13.143 | 3.552  | 9.701  | 0.00 | 0.00 |
| ATOM | 425 | 1H5' | RC | 14 | 12.345 | 4.172  | 10.030 | 0.00 | 0.00 |
| ATOM | 426 | 2H5' | RC | 14 | 13.959 | 3.668  | 10.376 | 0.00 | 0.00 |
| ATOM | 427 | C4'  | RC | 14 | 12.691 | 2.110  | 9.739  | 0.00 | 0.00 |
| ATOM | 428 | H4'  | RC | 14 | 12.437 | 1.869  | 10.752 | 0.00 | 0.00 |
| ATOM | 429 | O4'  | RC | 14 | 11.564 | 1.868  | 8.931  | 0.00 | 0.00 |
| ATOM | 430 | C1'  | RC | 14 | 11.640 | 0.562  | 8.395  | 0.00 | 0.00 |
| ATOM | 431 | H1'  | RC | 14 | 10.793 | -0.008 | 8.715  | 0.00 | 0.00 |
| ATOM | 432 | N1   | RC | 14 | 11.668 | 0.575  | 6.915  | 0.00 | 0.00 |
| ATOM | 433 | C6   | RC | 14 | 12.187 | 1.609  | 6.219  | 0.00 | 0.00 |
| ATOM | 434 | H6   | RC | 14 | 12.621 | 2.423  | 6.743  | 0.00 | 0.00 |
| ATOM | 435 | C5   | RC | 14 | 12.156 | 1.616  | 4.876  | 0.00 | 0.00 |
| ATOM | 436 | H5   | RC | 14 | 12.556 | 2.433  | 4.341  | 0.00 | 0.00 |
| ATOM | 437 | C4   | RC | 14 | 11.586 | 0.516  | 4.234  | 0.00 | 0.00 |
| ATOM | 438 | N4   | RC | 14 | 11.517 | 0.478  | 2.950  | 0.00 | 0.00 |
| ATOM | 439 | H41  | RC | 14 | 11.091 | -0.293 | 2.515  | 0.00 | 0.00 |
| ATOM | 440 | H42  | RC | 14 | 11.883 | 1.217  | 2.424  | 0.00 | 0.00 |
| ATOM | 441 | N3   | RC | 14 | 11.103 | -0.499 | 4.875  | 0.00 | 0.00 |
| ATOM | 442 | C2   | RC | 14 | 11.156 | -0.501 | 6.215  | 0.00 | 0.00 |
| ATOM | 443 | O2   | RC | 14 | 10.748 | -1.486 | 6.781  | 0.00 | 0.00 |
| ATOM | 444 | C3'  | RC | 14 | 13.745 | 1.137  | 9.274  | 0.00 | 0.00 |
| ATOM | 445 | H3'  | RC | 14 | 14.169 | 1.493  | 8.358  | 0.00 | 0.00 |
| ATOM | 446 | C2'  | RC | 14 | 12.885 | -0.069 | 8.970  | 0.00 | 0.00 |
| ATOM | 447 | 1H2' | RC | 14 | 13.353 | -0.717 | 8.266  | 0.00 | 0.00 |
| ATOM | 448 | O2'  | RC | 14 | 12.540 | -0.773 | 10.116 | 0.00 | 0.00 |
| ATOM | 449 | 2HO' | RC | 14 | 13.027 | -0.868 | 10.543 | 0.00 | 0.00 |
| ATOM | 450 | O3'  | RC | 14 | 14.732 | 0.894  | 10.232 | 0.00 | 0.00 |
| ATOM | 451 | P    | RG | 15 | 16.195 | 0.553  | 9.821  | 0.00 | 0.00 |
| ATOM | 452 | O1P  | RG | 15 | 17.002 | 0.546  | 11.020 | 0.00 | 0.00 |
| ATOM | 453 | O2P  | RG | 15 | 16.573 | 1.411  | 8.727  | 0.00 | 0.00 |
| ATOM | 454 | O5'  | RG | 15 | 16.124 | -0.899 | 9.267  | 0.00 | 0.00 |
| ATOM | 455 | C5'  | RG | 15 | 16.068 | -2.000 | 10.108 | 0.00 | 0.00 |
| ATOM | 456 | 1H5' | RG | 15 | 15.238 | -1.900 | 10.765 | 0.00 | 0.00 |
| ATOM | 457 | 2H5' | RG | 15 | 16.953 | -2.051 | 10.687 | 0.00 | 0.00 |
| ATOM | 458 | C4'  | RG | 15 | 15.935 | -3.293 | 9.344  | 0.00 | 0.00 |
| ATOM | 459 | H4'  | RG | 15 | 15.974 | -4.092 | 10.047 | 0.00 | 0.00 |
| ATOM | 460 | O4'  | RG | 15 | 14.719 | -3.373 | 8.654  | 0.00 | 0.00 |
| ATOM | 461 | C1'  | RG | 15 | 14.929 | -4.073 | 7.448  | 0.00 | 0.00 |
| ATOM | 462 | H1'  | RG | 15 | 14.249 | -4.892 | 7.356  | 0.00 | 0.00 |
| ATOM | 463 | N9   | RG | 15 | 14.738 | -3.190 | 6.300  | 0.00 | 0.00 |
| ATOM | 464 | C8   | RG | 15 | 14.755 | -1.841 | 6.248  | 0.00 | 0.00 |
| ATOM | 465 | H8   | RG | 15 | 14.937 | -1.242 | 7.107  | 0.00 | 0.00 |
| ATOM | 466 | N7   | RG | 15 | 14.536 | -1.348 | 5.080  | 0.00 | 0.00 |
| ATOM | 467 | C5   | RG | 15 | 14.395 | -2.466 | 4.278  | 0.00 | 0.00 |
| ATOM | 468 | C6   | RG | 15 | 14.165 | -2.611 | 2.879  | 0.00 | 0.00 |

|      |     |      |     |    |        |        |        |      |      |
|------|-----|------|-----|----|--------|--------|--------|------|------|
| ATOM | 469 | O6   | RG  | 15 | 13.982 | -1.759 | 2.039  | 0.00 | 0.00 |
| ATOM | 470 | N1   | RG  | 15 | 14.181 | -3.901 | 2.452  | 0.00 | 0.00 |
| ATOM | 471 | H1   | RG  | 15 | 14.077 | -4.060 | 1.482  | 0.00 | 0.00 |
| ATOM | 472 | C2   | RG  | 15 | 14.369 | -4.944 | 3.263  | 0.00 | 0.00 |
| ATOM | 473 | N2   | RG  | 15 | 14.419 | -6.102 | 2.721  | 0.00 | 0.00 |
| ATOM | 474 | H21  | RG  | 15 | 14.358 | -6.209 | 1.748  | 0.00 | 0.00 |
| ATOM | 475 | H22  | RG  | 15 | 14.561 | -6.869 | 3.309  | 0.00 | 0.00 |
| ATOM | 476 | N3   | RG  | 15 | 14.546 | -4.865 | 4.563  | 0.00 | 0.00 |
| ATOM | 477 | C4   | RG  | 15 | 14.555 | -3.594 | 5.017  | 0.00 | 0.00 |
| ATOM | 478 | C3'  | RG  | 15 | 17.012 | -3.535 | 8.315  | 0.00 | 0.00 |
| ATOM | 479 | H3'  | RG  | 15 | 17.127 | -2.654 | 7.728  | 0.00 | 0.00 |
| ATOM | 480 | C2'  | RG  | 15 | 16.345 | -4.593 | 7.480  | 0.00 | 0.00 |
| ATOM | 481 | 1H2' | RG  | 15 | 16.772 | -4.648 | 6.502  | 0.00 | 0.00 |
| ATOM | 482 | O2'  | RG  | 15 | 16.352 | -5.849 | 8.078  | 0.00 | 0.00 |
| ATOM | 483 | 2HO' | RG  | 15 | 16.717 | -6.152 | 8.131  | 0.00 | 0.00 |
| ATOM | 484 | O3'  | RG  | 15 | 18.236 | -3.947 | 8.841  | 0.00 | 0.00 |
| ATOM | 485 | P    | RG  | 16 | 19.558 | -3.662 | 8.076  | 0.00 | 0.00 |
| ATOM | 486 | O1P  | RG  | 16 | 20.644 | -4.208 | 8.857  | 0.00 | 0.00 |
| ATOM | 487 | O2P  | RG  | 16 | 19.580 | -2.264 | 7.738  | 0.00 | 0.00 |
| ATOM | 488 | O5'  | RG  | 16 | 19.468 | -4.468 | 6.735  | 0.00 | 0.00 |
| ATOM | 489 | C5'  | RG  | 16 | 19.572 | -5.856 | 6.701  | 0.00 | 0.00 |
| ATOM | 490 | 1H5' | RG  | 16 | 18.858 | -6.281 | 7.361  | 0.00 | 0.00 |
| ATOM | 491 | 2H5' | RG  | 16 | 20.542 | -6.153 | 7.023  | 0.00 | 0.00 |
| ATOM | 492 | C4'  | RG  | 16 | 19.336 | -6.412 | 5.318  | 0.00 | 0.00 |
| ATOM | 493 | H4'  | RG  | 16 | 19.407 | -7.474 | 5.372  | 0.00 | 0.00 |
| ATOM | 494 | O4'  | RG  | 16 | 18.074 | -6.081 | 4.806  | 0.00 | 0.00 |
| ATOM | 495 | C1'  | RG  | 16 | 18.178 | -5.877 | 3.420  | 0.00 | 0.00 |
| ATOM | 496 | H1'  | RG  | 16 | 17.487 | -6.496 | 2.888  | 0.00 | 0.00 |
| ATOM | 497 | N9   | RG  | 16 | 17.897 | -4.487 | 3.070  | 0.00 | 0.00 |
| ATOM | 498 | C8   | RG  | 16 | 17.842 | -3.391 | 3.866  | 0.00 | 0.00 |
| ATOM | 499 | H8   | RG  | 16 | 18.036 | -3.431 | 4.910  | 0.00 | 0.00 |
| ATOM | 500 | N7   | RG  | 16 | 17.519 | -2.308 | 3.250  | 0.00 | 0.00 |
| ATOM | 501 | C5   | RG  | 16 | 17.371 | -2.710 | 1.933  | 0.00 | 0.00 |
| ATOM | 502 | C6   | RG  | 16 | 17.029 | -1.994 | 0.751  | 0.00 | 0.00 |
| ATOM | 503 | O6   | RG  | 16 | 16.738 | -0.827 | 0.618  | 0.00 | 0.00 |
| ATOM | 504 | N1   | RG  | 16 | 17.056 | -2.756 | -0.376 | 0.00 | 0.00 |
| ATOM | 505 | H1   | RG  | 16 | 16.871 | -2.307 | -1.237 | 0.00 | 0.00 |
| ATOM | 506 | C2   | RG  | 16 | 17.315 | -4.061 | -0.379 | 0.00 | 0.00 |
| ATOM | 507 | N2   | RG  | 16 | 17.333 | -4.647 | -1.518 | 0.00 | 0.00 |
| ATOM | 508 | H21  | RG  | 16 | 17.209 | -4.127 | -2.348 | 0.00 | 0.00 |
| ATOM | 509 | H22  | RG  | 16 | 17.544 | -5.601 | -1.539 | 0.00 | 0.00 |
| ATOM | 510 | N3   | RG  | 16 | 17.595 | -4.775 | 0.685  | 0.00 | 0.00 |
| ATOM | 511 | C4   | RG  | 16 | 17.618 | -4.040 | 1.818  | 0.00 | 0.00 |
| ATOM | 512 | C3'  | RG  | 16 | 20.336 | -5.952 | 4.301  | 0.00 | 0.00 |
| ATOM | 513 | H3'  | RG  | 16 | 20.467 | -4.901 | 4.393  | 0.00 | 0.00 |
| ATOM | 514 | C2'  | RG  | 16 | 19.585 | -6.248 | 3.029  | 0.00 | 0.00 |
| ATOM | 515 | 1H2' | RG  | 16 | 19.939 | -5.657 | 2.218  | 0.00 | 0.00 |
| ATOM | 516 | O2'  | RG  | 16 | 19.606 | -7.600 | 2.696  | 0.00 | 0.00 |
| ATOM | 517 | 2HO' | RG  | 16 | 19.956 | -7.863 | 2.580  | 0.00 | 0.00 |
| ATOM | 518 | O3'  | RG  | 16 | 21.546 | -6.627 | 4.395  | 0.00 | 0.00 |
| ATOM | 519 | P    | RC3 | 17 | 22.866 | -5.966 | 3.952  | 0.00 | 0.00 |
| ATOM | 520 | O1P  | RC3 | 17 | 23.919 | -6.905 | 4.211  | 0.00 | 0.00 |
| ATOM | 521 | O2P  | RC3 | 17 | 22.941 | -4.675 | 4.559  | 0.00 | 0.00 |
| ATOM | 522 | O5'  | RC3 | 17 | 22.746 | -5.766 | 2.415  | 0.00 | 0.00 |
| ATOM | 523 | C5'  | RC3 | 17 | 22.810 | -6.821 | 1.531  | 0.00 | 0.00 |
| ATOM | 524 | 1H5' | RC3 | 17 | 22.064 | -7.521 | 1.764  | 0.00 | 0.00 |
| ATOM | 525 | 2H5' | RC3 | 17 | 23.746 | -7.292 | 1.619  | 0.00 | 0.00 |
| ATOM | 526 | C4'  | RC3 | 17 | 22.620 | -6.391 | 0.111  | 0.00 | 0.00 |
| ATOM | 527 | H4'  | RC3 | 17 | 22.678 | -7.241 | -0.502 | 0.00 | 0.00 |
| ATOM | 528 | O4'  | RC3 | 17 | 21.389 | -5.796 | -0.102 | 0.00 | 0.00 |
| ATOM | 529 | C1'  | RC3 | 17 | 21.531 | -4.776 | -1.026 | 0.00 | 0.00 |
| ATOM | 530 | H1'  | RC3 | 17 | 21.021 | -5.032 | -1.900 | 0.00 | 0.00 |
| ATOM | 531 | N1   | RC3 | 17 | 21.023 | -3.501 | -0.545 | 0.00 | 0.00 |
| ATOM | 532 | C6   | RC3 | 17 | 21.079 | -3.156 | 0.751  | 0.00 | 0.00 |
| ATOM | 533 | H6   | RC3 | 17 | 21.453 | -3.836 | 1.458  | 0.00 | 0.00 |
| ATOM | 534 | C5   | RC3 | 17 | 20.677 | -1.959 | 1.141  | 0.00 | 0.00 |
| ATOM | 535 | H5   | RC3 | 17 | 20.719 | -1.691 | 2.155  | 0.00 | 0.00 |
| ATOM | 536 | C4   | RC3 | 17 | 20.211 | -1.097 | 0.163  | 0.00 | 0.00 |



|      |     |      |     |    |         |        |        |      |      |
|------|-----|------|-----|----|---------|--------|--------|------|------|
| ATOM | 537 | N4   | RC3 | 17 | 19.825  | 0.066  | 0.466  | 0.00 | 0.00 |
| ATOM | 538 | H41  | RC3 | 17 | 19.451  | 0.610  | -0.248 | 0.00 | 0.00 |
| ATOM | 539 | H42  | RC3 | 17 | 19.827  | 0.337  | 1.395  | 0.00 | 0.00 |
| ATOM | 540 | N3   | RC3 | 17 | 20.150  | -1.403 | -1.083 | 0.00 | 0.00 |
| ATOM | 541 | C2   | RC3 | 17 | 20.548  | -2.604 | -1.460 | 0.00 | 0.00 |
| ATOM | 542 | O2   | RC3 | 17 | 20.492  | -2.861 | -2.631 | 0.00 | 0.00 |
| ATOM | 543 | C3'  | RC3 | 17 | 23.639  | -5.425 | -0.350 | 0.00 | 0.00 |
| ATOM | 544 | H3'  | RC3 | 17 | 23.874  | -4.840 | 0.392  | 0.00 | 0.00 |
| ATOM | 545 | C2'  | RC3 | 17 | 22.965  | -4.686 | -1.334 | 0.00 | 0.00 |
| ATOM | 546 | 1H2' | RC3 | 17 | 23.237  | -3.777 | -1.301 | 0.00 | 0.00 |
| ATOM | 547 | O2'  | RC3 | 17 | 23.214  | -5.173 | -2.469 | 0.00 | 0.00 |
| ATOM | 548 | 2HO' | RC3 | 17 | 23.523  | -5.202 | -2.700 | 0.00 | 0.00 |
| ATOM | 549 | O3'  | RC3 | 17 | 24.709  | -5.939 | -0.874 | 0.00 | 0.00 |
| ATOM | 550 | H3T  | RC3 | 17 | 25.003  | -5.795 | -1.086 | 0.00 | 0.00 |
| ATOM | 551 | H5T  | RG5 | 18 | -22.382 | 1.033  | 9.685  | 0.00 | 0.00 |
| ATOM | 552 | O5'  | RG5 | 18 | -22.160 | 0.780  | 9.739  | 0.00 | 0.00 |
| ATOM | 553 | C5'  | RG5 | 18 | -21.030 | 0.177  | 9.398  | 0.00 | 0.00 |
| ATOM | 554 | 1H5' | RG5 | 18 | -20.251 | 0.579  | 9.941  | 0.00 | 0.00 |
| ATOM | 555 | 2H5' | RG5 | 18 | -20.869 | 0.329  | 8.404  | 0.00 | 0.00 |
| ATOM | 556 | C4'  | RG5 | 18 | -21.078 | -1.237 | 9.671  | 0.00 | 0.00 |
| ATOM | 557 | H4'  | RG5 | 18 | -21.316 | -1.375 | 10.668 | 0.00 | 0.00 |
| ATOM | 558 | O4'  | RG5 | 18 | -21.999 | -1.855 | 8.865  | 0.00 | 0.00 |
| ATOM | 559 | C1'  | RG5 | 18 | -21.535 | -3.093 | 8.479  | 0.00 | 0.00 |
| ATOM | 560 | H1'  | RG5 | 18 | -22.206 | -3.843 | 8.766  | 0.00 | 0.00 |
| ATOM | 561 | N9   | RG5 | 18 | -21.389 | -3.155 | 7.027  | 0.00 | 0.00 |
| ATOM | 562 | C8   | RG5 | 18 | -21.533 | -2.183 | 6.124  | 0.00 | 0.00 |
| ATOM | 563 | H8   | RG5 | 18 | -21.748 | -1.206 | 6.408  | 0.00 | 0.00 |
| ATOM | 564 | N7   | RG5 | 18 | -21.411 | -2.545 | 4.896  | 0.00 | 0.00 |
| ATOM | 565 | C5   | RG5 | 18 | -21.161 | -3.869 | 4.991  | 0.00 | 0.00 |
| ATOM | 566 | C6   | RG5 | 18 | -20.951 | -4.838 | 3.993  | 0.00 | 0.00 |
| ATOM | 567 | O6   | RG5 | 18 | -20.975 | -4.724 | 2.790  | 0.00 | 0.00 |
| ATOM | 568 | N1   | RG5 | 18 | -20.696 | -6.053 | 4.497  | 0.00 | 0.00 |
| ATOM | 569 | H1   | RG5 | 18 | -20.490 | -6.761 | 3.856  | 0.00 | 0.00 |
| ATOM | 570 | C2   | RG5 | 18 | -20.695 | -6.329 | 5.800  | 0.00 | 0.00 |
| ATOM | 571 | N2   | RG5 | 18 | -20.437 | -7.518 | 6.131  | 0.00 | 0.00 |
| ATOM | 572 | H21  | RG5 | 18 | -20.230 | -8.176 | 5.440  | 0.00 | 0.00 |
| ATOM | 573 | H22  | RG5 | 18 | -20.442 | -7.740 | 7.088  | 0.00 | 0.00 |
| ATOM | 574 | N3   | RG5 | 18 | -20.917 | -5.476 | 6.759  | 0.00 | 0.00 |
| ATOM | 575 | C4   | RG5 | 18 | -21.139 | -4.251 | 6.293  | 0.00 | 0.00 |
| ATOM | 576 | C3'  | RG5 | 18 | -19.800 | -1.906 | 9.434  | 0.00 | 0.00 |
| ATOM | 577 | H3'  | RG5 | 18 | -19.408 | -1.551 | 8.536  | 0.00 | 0.00 |
| ATOM | 578 | C2'  | RG5 | 18 | -20.251 | -3.286 | 9.217  | 0.00 | 0.00 |
| ATOM | 579 | 1H2' | RG5 | 18 | -19.569 | -3.820 | 8.642  | 0.00 | 0.00 |
| ATOM | 580 | O2'  | RG5 | 18 | -20.498 | -3.921 | 10.409 | 0.00 | 0.00 |
| ATOM | 581 | 2HO' | RG5 | 18 | -20.069 | -3.967 | 10.779 | 0.00 | 0.00 |
| ATOM | 582 | O3'  | RG5 | 18 | -18.918 | -1.758 | 10.493 | 0.00 | 0.00 |
| ATOM | 583 | P    | RC  | 19 | -17.407 | -1.749 | 10.276 | 0.00 | 0.00 |
| ATOM | 584 | O1P  | RC  | 19 | -16.796 | -1.513 | 11.553 | 0.00 | 0.00 |
| ATOM | 585 | O2P  | RC  | 19 | -17.124 | -0.868 | 9.195  | 0.00 | 0.00 |
| ATOM | 586 | O5'  | RC  | 19 | -17.045 | -3.165 | 9.808  | 0.00 | 0.00 |
| ATOM | 587 | C5'  | RC  | 19 | -17.035 | -4.227 | 10.684 | 0.00 | 0.00 |
| ATOM | 588 | 1H5' | RC  | 19 | -17.950 | -4.278 | 11.200 | 0.00 | 0.00 |
| ATOM | 589 | 2H5' | RC  | 19 | -16.265 | -4.096 | 11.403 | 0.00 | 0.00 |
| ATOM | 590 | C4'  | RC  | 19 | -16.825 | -5.522 | 9.966  | 0.00 | 0.00 |
| ATOM | 591 | H4'  | RC  | 19 | -16.848 | -6.297 | 10.694 | 0.00 | 0.00 |
| ATOM | 592 | O4'  | RC  | 19 | -17.823 | -5.769 | 9.006  | 0.00 | 0.00 |
| ATOM | 593 | C1'  | RC  | 19 | -17.274 | -6.471 | 7.927  | 0.00 | 0.00 |
| ATOM | 594 | H1'  | RC  | 19 | -17.781 | -7.397 | 7.810  | 0.00 | 0.00 |
| ATOM | 595 | N1   | RC  | 19 | -17.361 | -5.738 | 6.650  | 0.00 | 0.00 |
| ATOM | 596 | C6   | RC  | 19 | -17.540 | -4.419 | 6.595  | 0.00 | 0.00 |
| ATOM | 597 | H6   | RC  | 19 | -17.595 | -3.869 | 7.494  | 0.00 | 0.00 |
| ATOM | 598 | C5   | RC  | 19 | -17.659 | -3.806 | 5.413  | 0.00 | 0.00 |
| ATOM | 599 | H5   | RC  | 19 | -17.810 | -2.775 | 5.375  | 0.00 | 0.00 |
| ATOM | 600 | C4   | RC  | 19 | -17.574 | -4.576 | 4.259  | 0.00 | 0.00 |
| ATOM | 601 | N4   | RC  | 19 | -17.707 | -4.056 | 3.098  | 0.00 | 0.00 |
| ATOM | 602 | H41  | RC  | 19 | -17.664 | -4.638 | 2.313  | 0.00 | 0.00 |
| ATOM | 603 | H42  | RC  | 19 | -17.873 | -3.109 | 3.019  | 0.00 | 0.00 |
| ATOM | 604 | N3   | RC  | 19 | -17.363 | -5.836 | 4.285  | 0.00 | 0.00 |

|      |     |      |    |    |         |        |        |      |      |
|------|-----|------|----|----|---------|--------|--------|------|------|
| ATOM | 605 | C2   | RC | 19 | -17.253 | -6.438 | 5.471  | 0.00 | 0.00 |
| ATOM | 606 | O2   | RC | 19 | -17.044 | -7.611 | 5.468  | 0.00 | 0.00 |
| ATOM | 607 | C3'  | RC | 19 | -15.526 | -5.614 | 9.237  | 0.00 | 0.00 |
| ATOM | 608 | H3'  | RC | 19 | -15.372 | -4.727 | 8.675  | 0.00 | 0.00 |
| ATOM | 609 | C2'  | RC | 19 | -15.844 | -6.743 | 8.299  | 0.00 | 0.00 |
| ATOM | 610 | 1H2' | RC | 19 | -15.207 | -6.725 | 7.447  | 0.00 | 0.00 |
| ATOM | 611 | O2'  | RC | 19 | -15.789 | -7.976 | 8.933  | 0.00 | 0.00 |
| ATOM | 612 | 2HO' | RC | 19 | -15.323 | -8.095 | 9.295  | 0.00 | 0.00 |
| ATOM | 613 | O3'  | RC | 19 | -14.438 | -5.896 | 10.067 | 0.00 | 0.00 |
| ATOM | 614 | P    | RU | 20 | -13.008 | -5.440 | 9.678  | 0.00 | 0.00 |
| ATOM | 615 | O1P  | RU | 20 | -12.100 | -5.976 | 10.664 | 0.00 | 0.00 |
| ATOM | 616 | O2P  | RU | 20 | -13.039 | -4.024 | 9.481  | 0.00 | 0.00 |
| ATOM | 617 | O5'  | RU | 20 | -12.704 | -6.097 | 8.292  | 0.00 | 0.00 |
| ATOM | 618 | C5'  | RU | 20 | -12.400 | -7.439 | 8.176  | 0.00 | 0.00 |
| ATOM | 619 | 1H5' | RU | 20 | -13.153 | -8.018 | 8.641  | 0.00 | 0.00 |
| ATOM | 620 | 2H5' | RU | 20 | -11.479 | -7.631 | 8.669  | 0.00 | 0.00 |
| ATOM | 621 | C4'  | RU | 20 | -12.287 | -7.873 | 6.734  | 0.00 | 0.00 |
| ATOM | 622 | H4'  | RU | 20 | -12.092 | -8.913 | 6.723  | 0.00 | 0.00 |
| ATOM | 623 | O4'  | RU | 20 | -13.463 | -7.644 | 6.001  | 0.00 | 0.00 |
| ATOM | 624 | C1'  | RU | 20 | -13.137 | -7.389 | 4.656  | 0.00 | 0.00 |
| ATOM | 625 | H1'  | RU | 20 | -13.556 | -8.150 | 4.035  | 0.00 | 0.00 |
| ATOM | 626 | N1   | RU | 20 | -13.627 | -6.100 | 4.175  | 0.00 | 0.00 |
| ATOM | 627 | C6   | RU | 20 | -13.836 | -5.063 | 5.012  | 0.00 | 0.00 |
| ATOM | 628 | H6   | RU | 20 | -13.693 | -5.186 | 6.057  | 0.00 | 0.00 |
| ATOM | 629 | C5   | RU | 20 | -14.202 | -3.879 | 4.526  | 0.00 | 0.00 |
| ATOM | 630 | H5   | RU | 20 | -14.357 | -3.074 | 5.184  | 0.00 | 0.00 |
| ATOM | 631 | C4   | RU | 20 | -14.380 | -3.656 | 3.130  | 0.00 | 0.00 |
| ATOM | 632 | O4   | RU | 20 | -14.693 | -2.621 | 2.618  | 0.00 | 0.00 |
| ATOM | 633 | N3   | RU | 20 | -14.156 | -4.731 | 2.360  | 0.00 | 0.00 |
| ATOM | 634 | H3   | RU | 20 | -14.262 | -4.615 | 1.386  | 0.00 | 0.00 |
| ATOM | 635 | C2   | RU | 20 | -13.776 | -5.941 | 2.811  | 0.00 | 0.00 |
| ATOM | 636 | O2   | RU | 20 | -13.571 | -6.816 | 2.012  | 0.00 | 0.00 |
| ATOM | 637 | C3'  | RU | 20 | -11.188 | -7.199 | 5.976  | 0.00 | 0.00 |
| ATOM | 638 | H3'  | RU | 20 | -11.223 | -6.162 | 6.186  | 0.00 | 0.00 |
| ATOM | 639 | C2'  | RU | 20 | -11.640 | -7.450 | 4.555  | 0.00 | 0.00 |
| ATOM | 640 | 1H2' | RU | 20 | -11.260 | -6.705 | 3.909  | 0.00 | 0.00 |
| ATOM | 641 | O2'  | RU | 20 | -11.289 | -8.703 | 4.099  | 0.00 | 0.00 |
| ATOM | 642 | 2HO' | RU | 20 | -10.538 | -8.771 | 4.120  | 0.00 | 0.00 |
| ATOM | 643 | O3'  | RU | 20 | -9.931  | -7.721 | 6.273  | 0.00 | 0.00 |
| ATOM | 644 | P    | RG | 21 | -8.627  | -7.011 | 5.805  | 0.00 | 0.00 |
| ATOM | 645 | O1P  | RG | 21 | -7.537  | -7.599 | 6.556  | 0.00 | 0.00 |
| ATOM | 646 | O2P  | RG | 21 | -8.838  | -5.590 | 5.882  | 0.00 | 0.00 |
| ATOM | 647 | O5'  | RG | 21 | -8.476  | -7.392 | 4.288  | 0.00 | 0.00 |
| ATOM | 648 | C5'  | RG | 21 | -8.042  | -8.647 | 3.884  | 0.00 | 0.00 |
| ATOM | 649 | 1H5' | RG | 21 | -8.709  | -9.389 | 4.238  | 0.00 | 0.00 |
| ATOM | 650 | 2H5' | RG | 21 | -7.089  | -8.838 | 4.309  | 0.00 | 0.00 |
| ATOM | 651 | C4'  | RG | 21 | -7.939  | -8.760 | 2.371  | 0.00 | 0.00 |
| ATOM | 652 | H4'  | RG | 21 | -7.644  | -9.758 | 2.122  | 0.00 | 0.00 |
| ATOM | 653 | O4'  | RG | 21 | -9.167  | -8.496 | 1.745  | 0.00 | 0.00 |
| ATOM | 654 | C1'  | RG | 21 | -8.940  | -7.825 | 0.533  | 0.00 | 0.00 |
| ATOM | 655 | H1'  | RG | 21 | -9.367  | -8.371 | -0.291 | 0.00 | 0.00 |
| ATOM | 656 | N9   | RG | 21 | -9.554  | -6.490 | 0.555  | 0.00 | 0.00 |
| ATOM | 657 | C8   | RG | 21 | -9.761  | -5.660 | 1.606  | 0.00 | 0.00 |
| ATOM | 658 | H8   | RG | 21 | -9.452  | -5.899 | 2.597  | 0.00 | 0.00 |
| ATOM | 659 | N7   | RG | 21 | -10.380 | -4.564 | 1.308  | 0.00 | 0.00 |
| ATOM | 660 | C5   | RG | 21 | -10.575 | -4.655 | -0.062 | 0.00 | 0.00 |
| ATOM | 661 | C6   | RG | 21 | -11.186 | -3.764 | -1.000 | 0.00 | 0.00 |
| ATOM | 662 | O6   | RG | 21 | -11.725 | -2.692 | -0.810 | 0.00 | 0.00 |
| ATOM | 663 | N1   | RG | 21 | -11.145 | -4.212 | -2.290 | 0.00 | 0.00 |
| ATOM | 664 | H1   | RG | 21 | -11.515 | -3.622 | -3.000 | 0.00 | 0.00 |
| ATOM | 665 | C2   | RG | 21 | -10.587 | -5.372 | -2.647 | 0.00 | 0.00 |
| ATOM | 666 | N2   | RG | 21 | -10.606 | -5.654 | -3.903 | 0.00 | 0.00 |
| ATOM | 667 | H21  | RG | 21 | -11.002 | -5.023 | -4.555 | 0.00 | 0.00 |
| ATOM | 668 | H22  | RG | 21 | -10.215 | -6.509 | -4.174 | 0.00 | 0.00 |
| ATOM | 669 | N3   | RG | 21 | -10.033 | -6.239 | -1.818 | 0.00 | 0.00 |
| ATOM | 670 | C4   | RG | 21 | -10.052 | -5.825 | -0.529 | 0.00 | 0.00 |
| ATOM | 671 | C3'  | RG | 21 | -6.925  | -7.832 | 1.761  | 0.00 | 0.00 |
| ATOM | 672 | H3'  | RG | 21 | -7.004  | -6.869 | 2.229  | 0.00 | 0.00 |

|      |     |      |    |    |        |        |        |      |      |
|------|-----|------|----|----|--------|--------|--------|------|------|
| ATOM | 673 | C2'  | RG | 21 | -7.446 | -7.747 | 0.343  | 0.00 | 0.00 |
| ATOM | 674 | 1H2' | RG | 21 | -7.161 | -6.829 | -0.112 | 0.00 | 0.00 |
| ATOM | 675 | O2'  | RG | 21 | -7.032 | -8.825 | -0.442 | 0.00 | 0.00 |
| ATOM | 676 | 2HO' | RG | 21 | -6.153 | -8.822 | -0.446 | 0.00 | 0.00 |
| ATOM | 677 | O3'  | RG | 21 | -5.630 | -8.321 | 1.820  | 0.00 | 0.00 |
| ATOM | 678 | P    | RA | 22 | -4.378 | -7.783 | 2.112  | 0.00 | 0.00 |
| ATOM | 679 | O1P  | RA | 22 | -3.797 | -7.569 | 0.975  | 0.00 | 0.00 |
| ATOM | 680 | O2P  | RA | 22 | -3.801 | -8.663 | 2.915  | 0.00 | 0.00 |
| ATOM | 681 | O5'  | RA | 22 | -4.644 | -6.417 | 2.824  | 0.00 | 0.00 |
| ATOM | 682 | C5'  | RA | 22 | -3.659 | -5.690 | 3.474  | 0.00 | 0.00 |
| ATOM | 683 | 1H5' | RA | 22 | -2.831 | -5.577 | 2.830  | 0.00 | 0.00 |
| ATOM | 684 | 2H5' | RA | 22 | -3.341 | -6.225 | 4.323  | 0.00 | 0.00 |
| ATOM | 685 | C4'  | RA | 22 | -4.116 | -4.311 | 3.912  | 0.00 | 0.00 |
| ATOM | 686 | H4'  | RA | 22 | -3.309 | -3.874 | 4.471  | 0.00 | 0.00 |
| ATOM | 687 | O4'  | RA | 22 | -4.355 | -3.509 | 2.785  | 0.00 | 0.00 |
| ATOM | 688 | C1'  | RA | 22 | -5.722 | -3.204 | 2.688  | 0.00 | 0.00 |
| ATOM | 689 | H1'  | RA | 22 | -5.877 | -2.182 | 2.981  | 0.00 | 0.00 |
| ATOM | 690 | N9   | RA | 22 | -6.182 | -3.393 | 1.306  | 0.00 | 0.00 |
| ATOM | 691 | C8   | RA | 22 | -5.835 | -4.349 | 0.421  | 0.00 | 0.00 |
| ATOM | 692 | H8   | RA | 22 | -5.140 | -5.105 | 0.669  | 0.00 | 0.00 |
| ATOM | 693 | N7   | RA | 22 | -6.405 | -4.260 | -0.739 | 0.00 | 0.00 |
| ATOM | 694 | C5   | RA | 22 | -7.170 | -3.126 | -0.615 | 0.00 | 0.00 |
| ATOM | 695 | C6   | RA | 22 | -8.001 | -2.395 | -1.474 | 0.00 | 0.00 |
| ATOM | 696 | N6   | RA | 22 | -8.251 | -2.677 | -2.721 | 0.00 | 0.00 |
| ATOM | 697 | H61  | RA | 22 | -8.785 | -2.032 | -3.244 | 0.00 | 0.00 |
| ATOM | 698 | H62  | RA | 22 | -7.834 | -3.465 | -3.130 | 0.00 | 0.00 |
| ATOM | 699 | N1   | RA | 22 | -8.603 | -1.309 | -1.067 | 0.00 | 0.00 |
| ATOM | 700 | C2   | RA | 22 | -8.392 | -0.929 | 0.167  | 0.00 | 0.00 |
| ATOM | 701 | H2   | RA | 22 | -8.888 | -0.049 | 0.461  | 0.00 | 0.00 |
| ATOM | 702 | N3   | RA | 22 | -7.637 | -1.490 | 1.084  | 0.00 | 0.00 |
| ATOM | 703 | C4   | RA | 22 | -7.043 | -2.596 | 0.626  | 0.00 | 0.00 |
| ATOM | 704 | C3'  | RA | 22 | -5.385 | -4.294 | 4.758  | 0.00 | 0.00 |
| ATOM | 705 | H3'  | RA | 22 | -5.543 | -5.225 | 5.267  | 0.00 | 0.00 |
| ATOM | 706 | C2'  | RA | 22 | -6.437 | -4.099 | 3.680  | 0.00 | 0.00 |
| ATOM | 707 | 1H2' | RA | 22 | -6.634 | -5.048 | 3.221  | 0.00 | 0.00 |
| ATOM | 708 | O2'  | RA | 22 | -7.639 | -3.560 | 4.150  | 0.00 | 0.00 |
| ATOM | 709 | 2HO' | RA | 22 | -7.991 | -4.140 | 4.760  | 0.00 | 0.00 |
| ATOM | 710 | O3'  | RA | 22 | -5.359 | -3.204 | 5.650  | 0.00 | 0.00 |
| ATOM | 711 | P    | RA | 23 | -4.830 | -3.339 | 7.119  | 0.00 | 0.00 |
| ATOM | 712 | O1P  | RA | 23 | -5.425 | -4.517 | 7.705  | 0.00 | 0.00 |
| ATOM | 713 | O2P  | RA | 23 | -5.030 | -2.069 | 7.778  | 0.00 | 0.00 |
| ATOM | 714 | O5'  | RA | 23 | -3.286 | -3.585 | 7.029  | 0.00 | 0.00 |
| ATOM | 715 | C5'  | RA | 23 | -2.388 | -2.552 | 6.784  | 0.00 | 0.00 |
| ATOM | 716 | 1H5' | RA | 23 | -2.436 | -1.864 | 7.588  | 0.00 | 0.00 |
| ATOM | 717 | 2H5' | RA | 23 | -2.637 | -2.054 | 5.882  | 0.00 | 0.00 |
| ATOM | 718 | C4'  | RA | 23 | -0.985 | -3.090 | 6.683  | 0.00 | 0.00 |
| ATOM | 719 | H4'  | RA | 23 | -0.782 | -3.651 | 7.552  | 0.00 | 0.00 |
| ATOM | 720 | O4'  | RA | 23 | -0.871 | -3.906 | 5.573  | 0.00 | 0.00 |
| ATOM | 721 | C1'  | RA | 23 | 0.138  | -3.481 | 4.746  | 0.00 | 0.00 |
| ATOM | 722 | H1'  | RA | 23 | 0.906  | -4.185 | 4.776  | 0.00 | 0.00 |
| ATOM | 723 | N9   | RA | 23 | -0.335 | -3.386 | 3.358  | 0.00 | 0.00 |
| ATOM | 724 | C8   | RA | 23 | -0.111 | -4.270 | 2.390  | 0.00 | 0.00 |
| ATOM | 725 | H8   | RA | 23 | 0.481  | -5.123 | 2.551  | 0.00 | 0.00 |
| ATOM | 726 | N7   | RA | 23 | -0.694 | -4.012 | 1.272  | 0.00 | 0.00 |
| ATOM | 727 | C5   | RA | 23 | -1.358 | -2.847 | 1.518  | 0.00 | 0.00 |
| ATOM | 728 | C6   | RA | 23 | -2.198 | -2.013 | 0.781  | 0.00 | 0.00 |
| ATOM | 729 | N6   | RA | 23 | -2.563 | -2.192 | -0.430 | 0.00 | 0.00 |
| ATOM | 730 | H61  | RA | 23 | -3.179 | -1.554 | -0.834 | 0.00 | 0.00 |
| ATOM | 731 | H62  | RA | 23 | -2.241 | -2.976 | -0.878 | 0.00 | 0.00 |
| ATOM | 732 | N1   | RA | 23 | -2.696 | -0.935 | 1.278  | 0.00 | 0.00 |
| ATOM | 733 | C2   | RA | 23 | -2.388 | -0.680 | 2.507  | 0.00 | 0.00 |
| ATOM | 734 | H2   | RA | 23 | -2.803 | 0.193  | 2.889  | 0.00 | 0.00 |
| ATOM | 735 | N3   | RA | 23 | -1.623 | -1.358 | 3.322  | 0.00 | 0.00 |
| ATOM | 736 | C4   | RA | 23 | -1.133 | -2.451 | 2.775  | 0.00 | 0.00 |
| ATOM | 737 | C3'  | RA | 23 | 0.055  | -2.023 | 6.538  | 0.00 | 0.00 |
| ATOM | 738 | H3'  | RA | 23 | -0.346 | -1.207 | 6.500  | 0.00 | 0.00 |
| ATOM | 739 | C2'  | RA | 23 | 0.665  | -2.239 | 5.363  | 0.00 | 0.00 |
| ATOM | 740 | 1H2' | RA | 23 | 0.496  | -1.558 | 4.827  | 0.00 | 0.00 |

|      |     |      |    |    |        |        |        |      |      |
|------|-----|------|----|----|--------|--------|--------|------|------|
| ATOM | 741 | O2'  | RA | 23 | 1.826  | -2.272 | 5.618  | 0.00 | 0.00 |
| ATOM | 742 | 2HO' | RA | 23 | 2.041  | -1.841 | 6.147  | 0.00 | 0.00 |
| ATOM | 743 | O3'  | RA | 23 | 0.955  | -1.998 | 7.379  | 0.00 | 0.00 |
| ATOM | 744 | P    | RG | 24 | 0.745  | -1.421 | 8.581  | 0.00 | 0.00 |
| ATOM | 745 | O1P  | RG | 24 | 0.915  | -2.229 | 9.263  | 0.00 | 0.00 |
| ATOM | 746 | O2P  | RG | 24 | -0.250 | -1.025 | 8.496  | 0.00 | 0.00 |
| ATOM | 747 | O5'  | RG | 24 | 1.642  | -0.298 | 8.984  | 0.00 | 0.00 |
| ATOM | 748 | C5'  | RG | 24 | 2.009  | -0.122 | 10.271 | 0.00 | 0.00 |
| ATOM | 749 | 1H5' | RG | 24 | 2.515  | -0.953 | 10.595 | 0.00 | 0.00 |
| ATOM | 750 | 2H5' | RG | 24 | 1.149  | -0.012 | 10.871 | 0.00 | 0.00 |
| ATOM | 751 | C4'  | RG | 24 | 2.884  | 1.070  | 10.439 | 0.00 | 0.00 |
| ATOM | 752 | H4'  | RG | 24 | 3.055  | 1.200  | 11.474 | 0.00 | 0.00 |
| ATOM | 753 | O4'  | RG | 24 | 4.118  | 0.917  | 9.789  | 0.00 | 0.00 |
| ATOM | 754 | C1'  | RG | 24 | 4.502  | 2.134  | 9.209  | 0.00 | 0.00 |
| ATOM | 755 | H1'  | RG | 24 | 5.491  | 2.399  | 9.496  | 0.00 | 0.00 |
| ATOM | 756 | N9   | RG | 24 | 4.470  | 2.059  | 7.749  | 0.00 | 0.00 |
| ATOM | 757 | C8   | RG | 24 | 4.023  | 1.056  | 6.955  | 0.00 | 0.00 |
| ATOM | 758 | H8   | RG | 24 | 3.608  | 0.163  | 7.350  | 0.00 | 0.00 |
| ATOM | 759 | N7   | RG | 24 | 4.159  | 1.274  | 5.687  | 0.00 | 0.00 |
| ATOM | 760 | C5   | RG | 24 | 4.728  | 2.531  | 5.631  | 0.00 | 0.00 |
| ATOM | 761 | C6   | RG | 24 | 5.127  | 3.341  | 4.531  | 0.00 | 0.00 |
| ATOM | 762 | O6   | RG | 24 | 5.071  | 3.105  | 3.339  | 0.00 | 0.00 |
| ATOM | 763 | N1   | RG | 24 | 5.643  | 4.546  | 4.907  | 0.00 | 0.00 |
| ATOM | 764 | H1   | RG | 24 | 5.939  | 5.160  | 4.190  | 0.00 | 0.00 |
| ATOM | 765 | C2   | RG | 24 | 5.786  | 4.929  | 6.180  | 0.00 | 0.00 |
| ATOM | 766 | N2   | RG | 24 | 6.261  | 6.104  | 6.389  | 0.00 | 0.00 |
| ATOM | 767 | H21  | RG | 24 | 6.487  | 6.693  | 5.628  | 0.00 | 0.00 |
| ATOM | 768 | H22  | RG | 24 | 6.354  | 6.408  | 7.323  | 0.00 | 0.00 |
| ATOM | 769 | N3   | RG | 24 | 5.456  | 4.210  | 7.227  | 0.00 | 0.00 |
| ATOM | 770 | C4   | RG | 24 | 4.923  | 3.014  | 6.892  | 0.00 | 0.00 |
| ATOM | 771 | C3'  | RG | 24 | 2.294  | 2.332  | 9.928  | 0.00 | 0.00 |
| ATOM | 772 | H3'  | RG | 24 | 1.860  | 2.154  | 8.984  | 0.00 | 0.00 |
| ATOM | 773 | C2'  | RG | 24 | 3.535  | 3.155  | 9.729  | 0.00 | 0.00 |
| ATOM | 774 | 1H2' | RG | 24 | 3.377  | 3.934  | 9.024  | 0.00 | 0.00 |
| ATOM | 775 | O2'  | RG | 24 | 4.022  | 3.663  | 10.924 | 0.00 | 0.00 |
| ATOM | 776 | 2HO' | RG | 24 | 3.789  | 3.980  | 11.196 | 0.00 | 0.00 |
| ATOM | 777 | O3'  | RG | 24 | 1.386  | 2.902  | 10.812 | 0.00 | 0.00 |
| ATOM | 778 | P    | RU | 25 | 0.227  | 3.795  | 10.299 | 0.00 | 0.00 |
| ATOM | 779 | O1P  | RU | 25 | -0.526 | 4.222  | 11.441 | 0.00 | 0.00 |
| ATOM | 780 | O2P  | RU | 25 | -0.450 | 3.083  | 9.261  | 0.00 | 0.00 |
| ATOM | 781 | O5'  | RU | 25 | 0.882  | 5.052  | 9.652  | 0.00 | 0.00 |
| ATOM | 782 | C5'  | RU | 25 | 1.452  | 6.054  | 10.414 | 0.00 | 0.00 |
| ATOM | 783 | 1H5' | RU | 25 | 2.251  | 5.659  | 10.985 | 0.00 | 0.00 |
| ATOM | 784 | 2H5' | RU | 25 | 0.729  | 6.450  | 11.074 | 0.00 | 0.00 |
| ATOM | 785 | C4'  | RU | 25 | 1.960  | 7.190  | 9.570  | 0.00 | 0.00 |
| ATOM | 786 | H4'  | RU | 25 | 2.347  | 7.936  | 10.226 | 0.00 | 0.00 |
| ATOM | 787 | O4'  | RU | 25 | 2.972  | 6.801  | 8.686  | 0.00 | 0.00 |
| ATOM | 788 | C1'  | RU | 25 | 2.939  | 7.665  | 7.567  | 0.00 | 0.00 |
| ATOM | 789 | H1'  | RU | 25 | 3.837  | 8.246  | 7.553  | 0.00 | 0.00 |
| ATOM | 790 | N1   | RU | 25 | 2.831  | 6.938  | 6.286  | 0.00 | 0.00 |
| ATOM | 791 | C6   | RU | 25 | 2.270  | 5.699  | 6.194  | 0.00 | 0.00 |
| ATOM | 792 | H6   | RU | 25 | 1.918  | 5.220  | 7.075  | 0.00 | 0.00 |
| ATOM | 793 | C5   | RU | 25 | 2.168  | 5.076  | 5.004  | 0.00 | 0.00 |
| ATOM | 794 | H5   | RU | 25 | 1.736  | 4.108  | 4.943  | 0.00 | 0.00 |
| ATOM | 795 | C4   | RU | 25 | 2.632  | 5.681  | 3.796  | 0.00 | 0.00 |
| ATOM | 796 | O4   | RU | 25 | 2.576  | 5.189  | 2.691  | 0.00 | 0.00 |
| ATOM | 797 | N3   | RU | 25 | 3.178  | 6.909  | 3.965  | 0.00 | 0.00 |
| ATOM | 798 | H3   | RU | 25 | 3.502  | 7.367  | 3.150  | 0.00 | 0.00 |
| ATOM | 799 | C2   | RU | 25 | 3.279  | 7.583  | 5.145  | 0.00 | 0.00 |
| ATOM | 800 | O2   | RU | 25 | 3.735  | 8.705  | 5.153  | 0.00 | 0.00 |
| ATOM | 801 | C3'  | RU | 25 | 0.898  | 7.837  | 8.716  | 0.00 | 0.00 |
| ATOM | 802 | H3'  | RU | 25 | 0.376  | 7.075  | 8.186  | 0.00 | 0.00 |
| ATOM | 803 | C2'  | RU | 25 | 1.765  | 8.602  | 7.756  | 0.00 | 0.00 |
| ATOM | 804 | 1H2' | RU | 25 | 1.249  | 8.784  | 6.844  | 0.00 | 0.00 |
| ATOM | 805 | O2'  | RU | 25 | 2.225  | 9.798  | 8.299  | 0.00 | 0.00 |
| ATOM | 806 | 2HO' | RU | 25 | 1.739  | 10.206 | 8.527  | 0.00 | 0.00 |
| ATOM | 807 | O3'  | RU | 25 | 0.017  | 8.647  | 9.433  | 0.00 | 0.00 |
| ATOM | 808 | P    | RG | 26 | -1.412 | 8.952  | 8.894  | 0.00 | 0.00 |

|      |     |      |    |    |        |        |        |      |      |
|------|-----|------|----|----|--------|--------|--------|------|------|
| ATOM | 809 | O1P  | RG | 26 | -2.112 | 9.699  | 9.911  | 0.00 | 0.00 |
| ATOM | 810 | O2P  | RG | 26 | -1.979 | 7.718  | 8.419  | 0.00 | 0.00 |
| ATOM | 811 | O5'  | RG | 26 | -1.201 | 9.893  | 7.666  | 0.00 | 0.00 |
| ATOM | 812 | C5'  | RG | 26 | -0.909 | 11.248 | 7.826  | 0.00 | 0.00 |
| ATOM | 813 | 1H5' | RG | 26 | -0.073 | 11.352 | 8.473  | 0.00 | 0.00 |
| ATOM | 814 | 2H5' | RG | 26 | -1.738 | 11.748 | 8.267  | 0.00 | 0.00 |
| ATOM | 815 | C4'  | RG | 26 | -0.603 | 11.924 | 6.519  | 0.00 | 0.00 |
| ATOM | 816 | H4'  | RG | 26 | -0.359 | 12.944 | 6.724  | 0.00 | 0.00 |
| ATOM | 817 | O4'  | RG | 26 | 0.485  | 11.326 | 5.861  | 0.00 | 0.00 |
| ATOM | 818 | C1'  | RG | 26 | 0.309  | 11.473 | 4.471  | 0.00 | 0.00 |
| ATOM | 819 | H1'  | RG | 26 | 1.108  | 12.049 | 4.054  | 0.00 | 0.00 |
| ATOM | 820 | N9   | RG | 26 | 0.285  | 10.173 | 3.789  | 0.00 | 0.00 |
| ATOM | 821 | C8   | RG | 26 | -0.071 | 8.950  | 4.263  | 0.00 | 0.00 |
| ATOM | 822 | H8   | RG | 26 | -0.395 | 8.805  | 5.265  | 0.00 | 0.00 |
| ATOM | 823 | N7   | RG | 26 | 0.029  | 7.993  | 3.399  | 0.00 | 0.00 |
| ATOM | 824 | C5   | RG | 26 | 0.452  | 8.631  | 2.244  | 0.00 | 0.00 |
| ATOM | 825 | C6   | RG | 26 | 0.728  | 8.144  | 0.930  | 0.00 | 0.00 |
| ATOM | 826 | O6   | RG | 26 | 0.700  | 7.001  | 0.502  | 0.00 | 0.00 |
| ATOM | 827 | N1   | RG | 26 | 1.054  | 9.134  | 0.045  | 0.00 | 0.00 |
| ATOM | 828 | H1   | RG | 26 | 1.241  | 8.872  | -0.894 | 0.00 | 0.00 |
| ATOM | 829 | C2   | RG | 26 | 1.142  | 10.429 | 0.378  | 0.00 | 0.00 |
| ATOM | 830 | N2   | RG | 26 | 1.456  | 11.252 | -0.554 | 0.00 | 0.00 |
| ATOM | 831 | H21  | RG | 26 | 1.608  | 10.922 | -1.476 | 0.00 | 0.00 |
| ATOM | 832 | H22  | RG | 26 | 1.531  | 12.202 | -0.325 | 0.00 | 0.00 |
| ATOM | 833 | N3   | RG | 26 | 0.933  | 10.921 | 1.582  | 0.00 | 0.00 |
| ATOM | 834 | C4   | RG | 26 | 0.584  | 9.970  | 2.477  | 0.00 | 0.00 |
| ATOM | 835 | C3'  | RG | 26 | -1.741 | 11.921 | 5.535  | 0.00 | 0.00 |
| ATOM | 836 | H3'  | RG | 26 | -2.149 | 10.936 | 5.483  | 0.00 | 0.00 |
| ATOM | 837 | C2'  | RG | 26 | -0.989 | 12.216 | 4.263  | 0.00 | 0.00 |
| ATOM | 838 | 1H2' | RG | 26 | -1.514 | 11.848 | 3.414  | 0.00 | 0.00 |
| ATOM | 839 | O2'  | RG | 26 | -0.698 | 13.569 | 4.123  | 0.00 | 0.00 |
| ATOM | 840 | 2HO' | RG | 26 | -1.132 | 13.908 | 4.033  | 0.00 | 0.00 |
| ATOM | 841 | O3'  | RG | 26 | -2.723 | 12.873 | 5.832  | 0.00 | 0.00 |
| ATOM | 842 | P    | RC | 27 | -4.175 | 12.726 | 5.293  | 0.00 | 0.00 |
| ATOM | 843 | O1P  | RC | 27 | -4.948 | 13.822 | 5.841  | 0.00 | 0.00 |
| ATOM | 844 | O2P  | RC | 27 | -4.608 | 11.373 | 5.541  | 0.00 | 0.00 |
| ATOM | 845 | O5'  | RC | 27 | -4.081 | 12.919 | 3.744  | 0.00 | 0.00 |
| ATOM | 846 | C5'  | RC | 27 | -3.920 | 14.181 | 3.176  | 0.00 | 0.00 |
| ATOM | 847 | 1H5' | RC | 27 | -3.085 | 14.669 | 3.619  | 0.00 | 0.00 |
| ATOM | 848 | 2H5' | RC | 27 | -4.785 | 14.775 | 3.361  | 0.00 | 0.00 |
| ATOM | 849 | C4'  | RC | 27 | -3.708 | 14.102 | 1.683  | 0.00 | 0.00 |
| ATOM | 850 | H4'  | RC | 27 | -3.555 | 15.097 | 1.316  | 0.00 | 0.00 |
| ATOM | 851 | O4'  | RC | 27 | -2.585 | 13.323 | 1.353  | 0.00 | 0.00 |
| ATOM | 852 | C1'  | RC | 27 | -2.793 | 12.731 | 0.090  | 0.00 | 0.00 |
| ATOM | 853 | H1'  | RC | 27 | -2.079 | 13.125 | -0.603 | 0.00 | 0.00 |
| ATOM | 854 | N1   | RC | 27 | -2.665 | 11.256 | 0.126  | 0.00 | 0.00 |
| ATOM | 855 | C6   | RC | 27 | -3.029 | 10.525 | 1.209  | 0.00 | 0.00 |
| ATOM | 856 | H6   | RC | 27 | -3.373 | 11.020 | 2.082  | 0.00 | 0.00 |
| ATOM | 857 | C5   | RC | 27 | -2.951 | 9.185  | 1.180  | 0.00 | 0.00 |
| ATOM | 858 | H5   | RC | 27 | -3.228 | 8.615  | 2.032  | 0.00 | 0.00 |
| ATOM | 859 | C4   | RC | 27 | -2.501 | 8.585  | 0.000  | 0.00 | 0.00 |
| ATOM | 860 | N4   | RC | 27 | -2.396 | 7.306  | -0.082 | 0.00 | 0.00 |
| ATOM | 861 | H41  | RC | 27 | -2.023 | 6.925  | -0.910 | 0.00 | 0.00 |
| ATOM | 862 | H42  | RC | 27 | -2.623 | 6.751  | 0.691  | 0.00 | 0.00 |
| ATOM | 863 | N3   | RC | 27 | -2.150 | 9.263  | -1.053 | 0.00 | 0.00 |
| ATOM | 864 | C2   | RC | 27 | -2.240 | 10.601 | -1.014 | 0.00 | 0.00 |
| ATOM | 865 | O2   | RC | 27 | -1.952 | 11.212 | -2.019 | 0.00 | 0.00 |
| ATOM | 866 | C3'  | RC | 27 | -4.867 | 13.511 | 0.925  | 0.00 | 0.00 |
| ATOM | 867 | H3'  | RC | 27 | -5.189 | 12.624 | 1.428  | 0.00 | 0.00 |
| ATOM | 868 | C2'  | RC | 27 | -4.175 | 13.137 | -0.365 | 0.00 | 0.00 |
| ATOM | 869 | 1H2' | RC | 27 | -4.678 | 12.331 | -0.845 | 0.00 | 0.00 |
| ATOM | 870 | O2'  | RC | 27 | -4.062 | 14.222 | -1.230 | 0.00 | 0.00 |
| ATOM | 871 | 2HO' | RC | 27 | -4.746 | 14.505 | -1.374 | 0.00 | 0.00 |
| ATOM | 872 | O3'  | RC | 27 | -5.926 | 14.413 | 0.751  | 0.00 | 0.00 |
| ATOM | 873 | P    | RA | 28 | -7.354 | 13.928 | 0.344  | 0.00 | 0.00 |
| ATOM | 874 | O1P  | RA | 28 | -8.226 | 15.077 | 0.370  | 0.00 | 0.00 |
| ATOM | 875 | O2P  | RA | 28 | -7.685 | 12.785 | 1.150  | 0.00 | 0.00 |
| ATOM | 876 | O5'  | RA | 28 | -7.219 | 13.463 | -1.139 | 0.00 | 0.00 |

|      |     |      |    |    |         |        |        |      |      |
|------|-----|------|----|----|---------|--------|--------|------|------|
| ATOM | 877 | C5'  | RA | 28 | -7.496  | 13.556 | -2.062 | 0.00 | 0.00 |
| ATOM | 878 | 1H5' | RA | 28 | -7.459  | 14.117 | -2.015 | 0.00 | 0.00 |
| ATOM | 879 | 2H5' | RA | 28 | -8.033  | 13.487 | -1.896 | 0.00 | 0.00 |
| ATOM | 880 | C4'  | RA | 28 | -7.103  | 13.000 | -3.381 | 0.00 | 0.00 |
| ATOM | 881 | H4'  | RA | 28 | -7.102  | 13.793 | -4.083 | 0.00 | 0.00 |
| ATOM | 882 | O4'  | RA | 28 | -5.827  | 12.418 | -3.330 | 0.00 | 0.00 |
| ATOM | 883 | C1'  | RA | 28 | -5.803  | 11.288 | -4.156 | 0.00 | 0.00 |
| ATOM | 884 | H1'  | RA | 28 | -5.013  | 11.356 | -4.866 | 0.00 | 0.00 |
| ATOM | 885 | N9   | RA | 28 | -5.611  | 10.065 | -3.363 | 0.00 | 0.00 |
| ATOM | 886 | C8   | RA | 28 | -5.824  | 9.857  | -2.038 | 0.00 | 0.00 |
| ATOM | 887 | H8   | RA | 28 | -6.188  | 10.615 | -1.393 | 0.00 | 0.00 |
| ATOM | 888 | N7   | RA | 28 | -5.542  | 8.666  | -1.628 | 0.00 | 0.00 |
| ATOM | 889 | C5   | RA | 28 | -5.123  | 8.030  | -2.786 | 0.00 | 0.00 |
| ATOM | 890 | C6   | RA | 28 | -4.672  | 6.743  | -3.104 | 0.00 | 0.00 |
| ATOM | 891 | N6   | RA | 28 | -4.504  | 5.775  | -2.250 | 0.00 | 0.00 |
| ATOM | 892 | H61  | RA | 28 | -4.146  | 4.914  | -2.579 | 0.00 | 0.00 |
| ATOM | 893 | H62  | RA | 28 | -4.693  | 5.932  | -1.299 | 0.00 | 0.00 |
| ATOM | 894 | N1   | RA | 28 | -4.378  | 6.414  | -4.346 | 0.00 | 0.00 |
| ATOM | 895 | C2   | RA | 28 | -4.504  | 7.334  | -5.273 | 0.00 | 0.00 |
| ATOM | 896 | H2   | RA | 28 | -4.253  | 7.036  | -6.260 | 0.00 | 0.00 |
| ATOM | 897 | N3   | RA | 28 | -4.890  | 8.580  | -5.131 | 0.00 | 0.00 |
| ATOM | 898 | C4   | RA | 28 | -5.188  | 8.869  | -3.848 | 0.00 | 0.00 |
| ATOM | 899 | C3'  | RA | 28 | -8.029  | 11.949 | -3.896 | 0.00 | 0.00 |
| ATOM | 900 | H3'  | RA | 28 | -8.255  | 11.273 | -3.110 | 0.00 | 0.00 |
| ATOM | 901 | C2'  | RA | 28 | -7.128  | 11.264 | -4.878 | 0.00 | 0.00 |
| ATOM | 902 | 1H2' | RA | 28 | -7.446  | 10.267 | -5.065 | 0.00 | 0.00 |
| ATOM | 903 | O2'  | RA | 28 | -7.009  | 11.973 | -6.069 | 0.00 | 0.00 |
| ATOM | 904 | 2HO' | RA | 28 | -7.493  | 12.137 | -6.346 | 0.00 | 0.00 |
| ATOM | 905 | O3'  | RA | 28 | -9.186  | 12.466 | -4.487 | 0.00 | 0.00 |
| ATOM | 906 | P    | RC | 29 | -10.513 | 11.663 | -4.481 | 0.00 | 0.00 |
| ATOM | 907 | O1P  | RC | 29 | -11.496 | 12.442 | -5.204 | 0.00 | 0.00 |
| ATOM | 908 | O2P  | RC | 29 | -10.787 | 11.289 | -3.124 | 0.00 | 0.00 |
| ATOM | 909 | O5'  | RC | 29 | -10.230 | 10.352 | -5.278 | 0.00 | 0.00 |
| ATOM | 910 | C5'  | RC | 29 | -10.101 | 10.360 | -6.657 | 0.00 | 0.00 |
| ATOM | 911 | 1H5' | RC | 29 | -9.388  | 11.091 | -6.936 | 0.00 | 0.00 |
| ATOM | 912 | 2H5' | RC | 29 | -11.033 | 10.616 | -7.102 | 0.00 | 0.00 |
| ATOM | 913 | C4'  | RC | 29 | -9.651  | 9.026  | -7.194 | 0.00 | 0.00 |
| ATOM | 914 | H4'  | RC | 29 | -9.502  | 9.126  | -8.244 | 0.00 | 0.00 |
| ATOM | 915 | O4'  | RC | 29 | -8.449  | 8.594  | -6.610 | 0.00 | 0.00 |
| ATOM | 916 | C1'  | RC | 29 | -8.412  | 7.188  | -6.621 | 0.00 | 0.00 |
| ATOM | 917 | H1'  | RC | 29 | -7.627  | 6.862  | -7.270 | 0.00 | 0.00 |
| ATOM | 918 | N1   | RC | 29 | -8.186  | 6.602  | -5.289 | 0.00 | 0.00 |
| ATOM | 919 | C6   | RC | 29 | -8.527  | 7.245  | -4.148 | 0.00 | 0.00 |
| ATOM | 920 | H6   | RC | 29 | -8.932  | 8.225  | -4.197 | 0.00 | 0.00 |
| ATOM | 921 | C5   | RC | 29 | -8.354  | 6.640  | -2.965 | 0.00 | 0.00 |
| ATOM | 922 | H5   | RC | 29 | -8.611  | 7.141  | -2.069 | 0.00 | 0.00 |
| ATOM | 923 | C4   | RC | 29 | -7.827  | 5.342  | -2.966 | 0.00 | 0.00 |
| ATOM | 924 | N4   | RC | 29 | -7.634  | 4.711  | -1.865 | 0.00 | 0.00 |
| ATOM | 925 | H41  | RC | 29 | -7.198  | 3.829  | -1.907 | 0.00 | 0.00 |
| ATOM | 926 | H42  | RC | 29 | -7.824  | 5.158  | -1.020 | 0.00 | 0.00 |
| ATOM | 927 | N3   | RC | 29 | -7.506  | 4.701  | -4.046 | 0.00 | 0.00 |
| ATOM | 928 | C2   | RC | 29 | -7.683  | 5.315  | -5.219 | 0.00 | 0.00 |
| ATOM | 929 | O2   | RC | 29 | -7.396  | 4.697  | -6.218 | 0.00 | 0.00 |
| ATOM | 930 | C3'  | RC | 29 | -10.635 | 7.915  | -6.990 | 0.00 | 0.00 |
| ATOM | 931 | H3'  | RC | 29 | -10.969 | 7.937  | -5.979 | 0.00 | 0.00 |
| ATOM | 932 | C2'  | RC | 29 | -9.728  | 6.726  | -7.195 | 0.00 | 0.00 |
| ATOM | 933 | 1H2' | RC | 29 | -10.099 | 5.876  | -6.678 | 0.00 | 0.00 |
| ATOM | 934 | O2'  | RC | 29 | -9.515  | 6.430  | -8.534 | 0.00 | 0.00 |
| ATOM | 935 | 2HO' | RC | 29 | -10.059 | 6.006  | -8.810 | 0.00 | 0.00 |
| ATOM | 936 | O3'  | RC | 29 | -11.720 | 7.968  | -7.875 | 0.00 | 0.00 |
| ATOM | 937 | P    | RA | 30 | -12.987 | 7.085  | -7.671 | 0.00 | 0.00 |
| ATOM | 938 | O1P  | RA | 30 | -14.004 | 7.576  | -8.573 | 0.00 | 0.00 |
| ATOM | 939 | O2P  | RA | 30 | -13.269 | 7.029  | -6.258 | 0.00 | 0.00 |
| ATOM | 940 | O5'  | RA | 30 | -12.587 | 5.645  | -8.132 | 0.00 | 0.00 |
| ATOM | 941 | C5'  | RA | 30 | -12.460 | 5.310  | -9.475 | 0.00 | 0.00 |
| ATOM | 942 | 1H5' | RA | 30 | -11.810 | 6.002  | -9.950 | 0.00 | 0.00 |
| ATOM | 943 | 2H5' | RA | 30 | -13.407 | 5.368  | -9.954 | 0.00 | 0.00 |
| ATOM | 944 | C4'  | RA | 30 | -11.909 | 3.914  | -9.652 | 0.00 | 0.00 |

|      |      |      |    |    |         |        |         |      |      |
|------|------|------|----|----|---------|--------|---------|------|------|
| ATOM | 945  | H4'  | RA | 30 | -11.719 | 3.764  | -10.691 | 0.00 | 0.00 |
| ATOM | 946  | O4'  | RA | 30 | -10.708 | 3.727  | -8.946  | 0.00 | 0.00 |
| ATOM | 947  | C1'  | RA | 30 | -10.632 | 2.389  | -8.505  | 0.00 | 0.00 |
| ATOM | 948  | H1'  | RA | 30 | -9.748  | 1.918  | -8.885  | 0.00 | 0.00 |
| ATOM | 949  | N9   | RA | 30 | -10.597 | 2.307  | -7.043  | 0.00 | 0.00 |
| ATOM | 950  | C8   | RA | 30 | -11.003 | 3.215  | -6.123  | 0.00 | 0.00 |
| ATOM | 951  | H8   | RA | 30 | -11.451 | 4.138  | -6.399  | 0.00 | 0.00 |
| ATOM | 952  | N7   | RA | 30 | -10.795 | 2.867  | -4.893  | 0.00 | 0.00 |
| ATOM | 953  | C5   | RA | 30 | -10.226 | 1.610  | -5.015  | 0.00 | 0.00 |
| ATOM | 954  | C6   | RA | 30 | -9.745  | 0.643  | -4.117  | 0.00 | 0.00 |
| ATOM | 955  | N6   | RA | 30 | -9.702  | 0.769  | -2.822  | 0.00 | 0.00 |
| ATOM | 956  | H61  | RA | 30 | -9.337  | 0.016  | -2.293  | 0.00 | 0.00 |
| ATOM | 957  | H62  | RA | 30 | -10.022 | 1.598  | -2.403  | 0.00 | 0.00 |
| ATOM | 958  | N1   | RA | 30 | -9.267  | -0.504 | -4.545  | 0.00 | 0.00 |
| ATOM | 959  | C2   | RA | 30 | -9.249  | -0.712 | -5.838  | 0.00 | 0.00 |
| ATOM | 960  | H2   | RA | 30 | -8.859  | -1.648 | -6.145  | 0.00 | 0.00 |
| ATOM | 961  | N3   | RA | 30 | -9.649  | 0.091  | -6.803  | 0.00 | 0.00 |
| ATOM | 962  | C4   | RA | 30 | -10.129 | 1.253  | -6.319  | 0.00 | 0.00 |
| ATOM | 963  | C3'  | RA | 30 | -12.834 | 2.815  | -9.208  | 0.00 | 0.00 |
| ATOM | 964  | H3'  | RA | 30 | -13.237 | 3.069  | -8.256  | 0.00 | 0.00 |
| ATOM | 965  | C2'  | RA | 30 | -11.847 | 1.679  | -9.049  | 0.00 | 0.00 |
| ATOM | 966  | 1H2' | RA | 30 | -12.212 | 0.943  | -8.370  | 0.00 | 0.00 |
| ATOM | 967  | O2'  | RA | 30 | -11.489 | 1.095  | -10.259 | 0.00 | 0.00 |
| ATOM | 968  | 2HO' | RA | 30 | -11.859 | 0.716  | -10.474 | 0.00 | 0.00 |
| ATOM | 969  | O3'  | RA | 30 | -13.845 | 2.550  | -10.135 | 0.00 | 0.00 |
| ATOM | 970  | P    | RC | 31 | -15.130 | 1.768  | -9.734  | 0.00 | 0.00 |
| ATOM | 971  | O1P  | RC | 31 | -16.010 | 1.774  | -10.875 | 0.00 | 0.00 |
| ATOM | 972  | O2P  | RC | 31 | -15.612 | 2.302  | -8.487  | 0.00 | 0.00 |
| ATOM | 973  | O5'  | RC | 31 | -14.677 | 0.292  | -9.472  | 0.00 | 0.00 |
| ATOM | 974  | C5'  | RC | 31 | -14.335 | -0.575 | -10.511 | 0.00 | 0.00 |
| ATOM | 975  | 1H5' | RC | 31 | -13.612 | -0.111 | -11.141 | 0.00 | 0.00 |
| ATOM | 976  | 2H5' | RC | 31 | -15.196 | -0.792 | -11.094 | 0.00 | 0.00 |
| ATOM | 977  | C4'  | RC | 31 | -13.760 | -1.875 | -9.984  | 0.00 | 0.00 |
| ATOM | 978  | H4'  | RC | 31 | -13.431 | -2.455 | -10.820 | 0.00 | 0.00 |
| ATOM | 979  | O4'  | RC | 31 | -12.666 | -1.660 | -9.129  | 0.00 | 0.00 |
| ATOM | 980  | C1'  | RC | 31 | -12.619 | -2.693 | -8.166  | 0.00 | 0.00 |
| ATOM | 981  | H1'  | RC | 31 | -11.719 | -3.261 | -8.297  | 0.00 | 0.00 |
| ATOM | 982  | N1   | RC | 31 | -12.652 | -2.177 | -6.780  | 0.00 | 0.00 |
| ATOM | 983  | C6   | RC | 31 | -13.262 | -1.014 | -6.462  | 0.00 | 0.00 |
| ATOM | 984  | H6   | RC | 31 | -13.726 | -0.441 | -7.226  | 0.00 | 0.00 |
| ATOM | 985  | C5   | RC | 31 | -13.277 | -0.584 | -5.193  | 0.00 | 0.00 |
| ATOM | 986  | H5   | RC | 31 | -13.747 | 0.332  | -4.951  | 0.00 | 0.00 |
| ATOM | 987  | C4   | RC | 31 | -12.664 | -1.386 | -4.223  | 0.00 | 0.00 |
| ATOM | 988  | N4   | RC | 31 | -12.649 | -1.020 | -2.994  | 0.00 | 0.00 |
| ATOM | 989  | H41  | RC | 31 | -12.169 | -1.582 | -2.343  | 0.00 | 0.00 |
| ATOM | 990  | H42  | RC | 31 | -13.026 | -0.151 | -2.751  | 0.00 | 0.00 |
| ATOM | 991  | N3   | RC | 31 | -12.097 | -2.518 | -4.494  | 0.00 | 0.00 |
| ATOM | 992  | C2   | RC | 31 | -12.078 | -2.930 | -5.770  | 0.00 | 0.00 |
| ATOM | 993  | O2   | RC | 31 | -11.543 | -3.990 | -6.004  | 0.00 | 0.00 |
| ATOM | 994  | C3'  | RC | 31 | -14.747 | -2.715 | -9.212  | 0.00 | 0.00 |
| ATOM | 995  | H3'  | RC | 31 | -15.283 | -2.086 | -8.535  | 0.00 | 0.00 |
| ATOM | 996  | C2'  | RC | 31 | -13.798 | -3.603 | -8.435  | 0.00 | 0.00 |
| ATOM | 997  | 1H2' | RC | 31 | -14.252 | -3.936 | -7.525  | 0.00 | 0.00 |
| ATOM | 998  | O2'  | RC | 31 | -13.353 | -4.697 | -9.180  | 0.00 | 0.00 |
| ATOM | 999  | 2HO' | RC | 31 | -14.048 | -5.237 | -9.298  | 0.00 | 0.00 |
| ATOM | 1000 | O3'  | RC | 31 | -15.626 | -3.411 | -10.050 | 0.00 | 0.00 |
| ATOM | 1001 | P    | RG | 32 | -16.778 | -4.295 | -9.481  | 0.00 | 0.00 |
| ATOM | 1002 | O1P  | RG | 32 | -17.622 | -4.682 | -10.571 | 0.00 | 0.00 |
| ATOM | 1003 | O2P  | RG | 32 | -17.341 | -3.611 | -8.360  | 0.00 | 0.00 |
| ATOM | 1004 | O5'  | RG | 32 | -16.048 | -5.576 | -8.997  | 0.00 | 0.00 |
| ATOM | 1005 | C5'  | RG | 32 | -16.501 | -6.333 | -7.945  | 0.00 | 0.00 |
| ATOM | 1006 | 1H5' | RG | 32 | -17.391 | -6.823 | -8.230  | 0.00 | 0.00 |
| ATOM | 1007 | 2H5' | RG | 32 | -16.697 | -5.719 | -7.119  | 0.00 | 0.00 |
| ATOM | 1008 | C4'  | RG | 32 | -15.471 | -7.342 | -7.554  | 0.00 | 0.00 |
| ATOM | 1009 | H4'  | RG | 32 | -15.228 | -7.923 | -8.409  | 0.00 | 0.00 |
| ATOM | 1010 | O4'  | RG | 32 | -14.310 | -6.728 | -7.060  | 0.00 | 0.00 |
| ATOM | 1011 | C1'  | RG | 32 | -13.894 | -7.354 | -5.867  | 0.00 | 0.00 |
| ATOM | 1012 | H1'  | RG | 32 | -12.848 | -7.558 | -5.886  | 0.00 | 0.00 |

|      |      |      |     |    |         |         |        |      |      |
|------|------|------|-----|----|---------|---------|--------|------|------|
| ATOM | 1013 | N9   | RG  | 32 | -14.169 | -6.490  | -4.715 | 0.00 | 0.00 |
| ATOM | 1014 | C8   | RG  | 32 | -14.749 | -5.269  | -4.698 | 0.00 | 0.00 |
| ATOM | 1015 | H8   | RG  | 32 | -15.095 | -4.788  | -5.580 | 0.00 | 0.00 |
| ATOM | 1016 | N7   | RG  | 32 | -14.863 | -4.750  | -3.527 | 0.00 | 0.00 |
| ATOM | 1017 | C5   | RG  | 32 | -14.295 | -5.693  | -2.692 | 0.00 | 0.00 |
| ATOM | 1018 | C6   | RG  | 32 | -14.111 | -5.717  | -1.282 | 0.00 | 0.00 |
| ATOM | 1019 | O6   | RG  | 32 | -14.422 | -4.885  | -0.461 | 0.00 | 0.00 |
| ATOM | 1020 | N1   | RG  | 32 | -13.496 | -6.844  | -0.826 | 0.00 | 0.00 |
| ATOM | 1021 | H1   | RG  | 32 | -13.374 | -6.933  | 0.153  | 0.00 | 0.00 |
| ATOM | 1022 | C2   | RG  | 32 | -13.089 | -7.830  | -1.623 | 0.00 | 0.00 |
| ATOM | 1023 | N2   | RG  | 32 | -12.535 | -8.845  | -1.065 | 0.00 | 0.00 |
| ATOM | 1024 | H21  | RG  | 32 | -12.436 | -8.914  | -0.087 | 0.00 | 0.00 |
| ATOM | 1025 | H22  | RG  | 32 | -12.227 | -9.561  | -1.659 | 0.00 | 0.00 |
| ATOM | 1026 | N3   | RG  | 32 | -13.238 | -7.854  | -2.931 | 0.00 | 0.00 |
| ATOM | 1027 | C4   | RG  | 32 | -13.854 | -6.753  | -3.415 | 0.00 | 0.00 |
| ATOM | 1028 | C3'  | RG  | 32 | -15.960 | -8.264  | -6.472 | 0.00 | 0.00 |
| ATOM | 1029 | H3'  | RG  | 32 | -16.543 | -7.711  | -5.779 | 0.00 | 0.00 |
| ATOM | 1030 | C2'  | RG  | 32 | -14.663 | -8.649  | -5.805 | 0.00 | 0.00 |
| ATOM | 1031 | 1H2' | RG  | 32 | -14.817 | -8.978  | -4.797 | 0.00 | 0.00 |
| ATOM | 1032 | O2'  | RG  | 32 | -13.967 | -9.610  | -6.529 | 0.00 | 0.00 |
| ATOM | 1033 | 2HO' | RG  | 32 | -14.322 | -10.040 | -6.873 | 0.00 | 0.00 |
| ATOM | 1034 | O3'  | RG  | 32 | -16.657 | -9.358  | -6.974 | 0.00 | 0.00 |
| ATOM | 1035 | P    | RG  | 33 | -17.841 | -9.983  | -6.198 | 0.00 | 0.00 |
| ATOM | 1036 | O1P  | RG  | 33 | -18.334 | -11.095 | -6.965 | 0.00 | 0.00 |
| ATOM | 1037 | O2P  | RG  | 33 | -18.745 | -8.929  | -5.852 | 0.00 | 0.00 |
| ATOM | 1038 | O5'  | RG  | 33 | -17.233 | -10.526 | -4.863 | 0.00 | 0.00 |
| ATOM | 1039 | C5'  | RG  | 33 | -16.451 | -11.668 | -4.814 | 0.00 | 0.00 |
| ATOM | 1040 | 1H5' | RG  | 33 | -15.609 | -11.545 | -5.442 | 0.00 | 0.00 |
| ATOM | 1041 | 2H5' | RG  | 33 | -17.009 | -12.495 | -5.165 | 0.00 | 0.00 |
| ATOM | 1042 | C4'  | RG  | 33 | -15.981 | -11.971 | -3.413 | 0.00 | 0.00 |
| ATOM | 1043 | H4'  | RG  | 33 | -15.416 | -12.868 | -3.437 | 0.00 | 0.00 |
| ATOM | 1044 | O4'  | RG  | 33 | -15.168 | -10.963 | -2.892 | 0.00 | 0.00 |
| ATOM | 1045 | C1'  | RG  | 33 | -15.462 | -10.785 | -1.530 | 0.00 | 0.00 |
| ATOM | 1046 | H1'  | RG  | 33 | -14.578 | -10.829 | -0.928 | 0.00 | 0.00 |
| ATOM | 1047 | N9   | RG  | 33 | -16.083 | -9.488  | -1.310 | 0.00 | 0.00 |
| ATOM | 1048 | C8   | RG  | 33 | -16.545 | -8.592  | -2.214 | 0.00 | 0.00 |
| ATOM | 1049 | H8   | RG  | 33 | -16.531 | -8.777  | -3.256 | 0.00 | 0.00 |
| ATOM | 1050 | N7   | RG  | 33 | -16.974 | -7.497  | -1.707 | 0.00 | 0.00 |
| ATOM | 1051 | C5   | RG  | 33 | -16.802 | -7.685  | -0.349 | 0.00 | 0.00 |
| ATOM | 1052 | C6   | RG  | 33 | -17.070 | -6.846  | 0.759  | 0.00 | 0.00 |
| ATOM | 1053 | O6   | RG  | 33 | -17.490 | -5.715  | 0.771  | 0.00 | 0.00 |
| ATOM | 1054 | N1   | RG  | 33 | -16.820 | -7.435  | 1.961  | 0.00 | 0.00 |
| ATOM | 1055 | H1   | RG  | 33 | -17.036 | -6.923  | 2.772  | 0.00 | 0.00 |
| ATOM | 1056 | C2   | RG  | 33 | -16.311 | -8.654  | 2.096  | 0.00 | 0.00 |
| ATOM | 1057 | N2   | RG  | 33 | -16.148 | -9.091  | 3.289  | 0.00 | 0.00 |
| ATOM | 1058 | H21  | RG  | 33 | -16.446 | -8.555  | 4.059  | 0.00 | 0.00 |
| ATOM | 1059 | H22  | RG  | 33 | -15.808 | -9.999  | 3.409  | 0.00 | 0.00 |
| ATOM | 1060 | N3   | RG  | 33 | -15.995 | -9.444  | 1.107  | 0.00 | 0.00 |
| ATOM | 1061 | C4   | RG  | 33 | -16.276 | -8.909  | -0.101 | 0.00 | 0.00 |
| ATOM | 1062 | C3'  | RG  | 33 | -17.097 | -12.168 | -2.439 | 0.00 | 0.00 |
| ATOM | 1063 | H3'  | RG  | 33 | -17.832 | -11.419 | -2.600 | 0.00 | 0.00 |
| ATOM | 1064 | C2'  | RG  | 33 | -16.382 | -11.905 | -1.136 | 0.00 | 0.00 |
| ATOM | 1065 | 1H2' | RG  | 33 | -17.060 | -11.615 | -0.375 | 0.00 | 0.00 |
| ATOM | 1066 | O2'  | RG  | 33 | -15.614 | -12.983 | -0.715 | 0.00 | 0.00 |
| ATOM | 1067 | 2HO' | RG  | 33 | -15.789 | -13.470 | -0.696 | 0.00 | 0.00 |
| ATOM | 1068 | O3'  | RG  | 33 | -17.646 | -13.439 | -2.499 | 0.00 | 0.00 |
| ATOM | 1069 | P    | RC3 | 34 | -19.135 | -13.680 | -2.191 | 0.00 | 0.00 |
| ATOM | 1070 | O1P  | RC3 | 34 | -19.394 | -15.077 | -2.355 | 0.00 | 0.00 |
| ATOM | 1071 | O2P  | RC3 | 34 | -19.905 | -12.751 | -2.965 | 0.00 | 0.00 |
| ATOM | 1072 | O5'  | RC3 | 34 | -19.302 | -13.323 | -0.690 | 0.00 | 0.00 |
| ATOM | 1073 | C5'  | RC3 | 34 | -18.808 | -14.126 | 0.323  | 0.00 | 0.00 |
| ATOM | 1074 | 1H5' | RC3 | 34 | -17.770 | -14.236 | 0.223  | 0.00 | 0.00 |
| ATOM | 1075 | 2H5' | RC3 | 34 | -19.251 | -15.072 | 0.251  | 0.00 | 0.00 |
| ATOM | 1076 | C4'  | RC3 | 34 | -19.086 | -13.577 | 1.683  | 0.00 | 0.00 |
| ATOM | 1077 | H4'  | RC3 | 34 | -18.706 | -14.246 | 2.400  | 0.00 | 0.00 |
| ATOM | 1078 | O4'  | RC3 | 34 | -18.478 | -12.363 | 1.887  | 0.00 | 0.00 |
| ATOM | 1079 | C1'  | RC3 | 34 | -19.289 | -11.584 | 2.672  | 0.00 | 0.00 |
| ATOM | 1080 | H1'  | RC3 | 34 | -18.830 | -11.446 | 3.594  | 0.00 | 0.00 |



|      |      |      |     |    |         |         |        |      |      |
|------|------|------|-----|----|---------|---------|--------|------|------|
| ATOM | 1081 | N1   | RC3 | 34 | -19.569 | -10.288 | 2.087  | 0.00 | 0.00 |
| ATOM | 1082 | C6   | RC3 | 34 | -19.634 | -10.108 | 0.760  | 0.00 | 0.00 |
| ATOM | 1083 | H6   | RC3 | 34 | -19.429 | -10.907 | 0.120  | 0.00 | 0.00 |
| ATOM | 1084 | C5   | RC3 | 34 | -19.955 | -8.932  | 0.256  | 0.00 | 0.00 |
| ATOM | 1085 | H5   | RC3 | 34 | -19.999 | -8.794  | -0.783 | 0.00 | 0.00 |
| ATOM | 1086 | C4   | RC3 | 34 | -20.230 | -7.922  | 1.148  | 0.00 | 0.00 |
| ATOM | 1087 | N4   | RC3 | 34 | -20.547 | -6.773  | 0.735  | 0.00 | 0.00 |
| ATOM | 1088 | H41  | RC3 | 34 | -20.661 | -6.080  | 1.400  | 0.00 | 0.00 |
| ATOM | 1089 | H42  | RC3 | 34 | -20.561 | -6.599  | -0.218 | 0.00 | 0.00 |
| ATOM | 1090 | N3   | RC3 | 34 | -20.186 | -8.068  | 2.424  | 0.00 | 0.00 |
| ATOM | 1091 | C2   | RC3 | 34 | -19.852 | -9.246  | 2.916  | 0.00 | 0.00 |
| ATOM | 1092 | O2   | RC3 | 34 | -19.829 | -9.363  | 4.110  | 0.00 | 0.00 |
| ATOM | 1093 | C3'  | RC3 | 34 | -20.522 | -13.389 | 1.951  | 0.00 | 0.00 |
| ATOM | 1094 | H3'  | RC3 | 34 | -20.962 | -13.101 | 1.124  | 0.00 | 0.00 |
| ATOM | 1095 | C2'  | RC3 | 34 | -20.520 | -12.337 | 2.877  | 0.00 | 0.00 |
| ATOM | 1096 | 1H2' | RC3 | 34 | -21.258 | -11.762 | 2.723  | 0.00 | 0.00 |
| ATOM | 1097 | O2'  | RC3 | 34 | -20.566 | -12.824 | 4.032  | 0.00 | 0.00 |
| ATOM | 1098 | 2HO' | RC3 | 34 | -20.915 | -13.058 | 4.226  | 0.00 | 0.00 |
| ATOM | 1099 | O3'  | RC3 | 34 | -21.159 | -14.412 | 2.465  | 0.00 | 0.00 |
| ATOM | 1100 | H3T  | RC3 | 34 | -21.435 | -14.457 | 2.628  | 0.00 | 0.00 |

# closed conformation - closed\_c.pdb

REMARK MD average structure 3000 - 3100 ps

REMARK 1JJM (PDB database)

REMARK sequence chain I. residues 1-23 5'(CUUGCUGAAGCGCGCACAGCAAG)3'

REMARK sequence chain II. residues 24-46 5'(CUUGCUGAAGCGCGCACAGCAAG)3'

REMARK PDB format: output from Ptraj module of AMBER-8.0

|      |    |      |     |   |         |        |         |      |      |
|------|----|------|-----|---|---------|--------|---------|------|------|
| ATOM | 1  | H5T  | RC5 | 1 | -12.417 | 19.671 | -8.595  | 0.00 | 0.00 |
| ATOM | 2  | O5'  | RC5 | 1 | -12.139 | 19.580 | -8.579  | 0.00 | 0.00 |
| ATOM | 3  | C5'  | RC5 | 1 | -10.821 | 19.430 | -8.541  | 0.00 | 0.00 |
| ATOM | 4  | 1H5' | RC5 | 1 | -10.564 | 18.644 | -9.140  | 0.00 | 0.00 |
| ATOM | 5  | 2H5' | RC5 | 1 | -10.512 | 19.232 | -7.576  | 0.00 | 0.00 |
| ATOM | 6  | C4'  | RC5 | 1 | -10.148 | 20.613 | -9.021  | 0.00 | 0.00 |
| ATOM | 7  | H4'  | RC5 | 1 | -10.544 | 20.875 | -9.956  | 0.00 | 0.00 |
| ATOM | 8  | O4'  | RC5 | 1 | -10.294 | 21.641 | -8.136  | 0.00 | 0.00 |
| ATOM | 9  | C1'  | RC5 | 1 | -9.205  | 22.472 | -8.205  | 0.00 | 0.00 |
| ATOM | 10 | H1'  | RC5 | 1 | -9.496  | 23.378 | -8.644  | 0.00 | 0.00 |
| ATOM | 11 | N1   | RC5 | 1 | -8.601  | 22.756 | -6.889  | 0.00 | 0.00 |
| ATOM | 12 | C6   | RC5 | 1 | -8.809  | 22.005 | -5.829  | 0.00 | 0.00 |
| ATOM | 13 | H6   | RC5 | 1 | -9.397  | 21.168 | -5.928  | 0.00 | 0.00 |
| ATOM | 14 | C5   | RC5 | 1 | -8.307  | 22.342 | -4.640  | 0.00 | 0.00 |
| ATOM | 15 | H5   | RC5 | 1 | -8.493  | 21.759 | -3.808  | 0.00 | 0.00 |
| ATOM | 16 | C4   | RC5 | 1 | -7.550  | 23.469 | -4.553  | 0.00 | 0.00 |
| ATOM | 17 | N4   | RC5 | 1 | -7.083  | 23.874 | -3.436  | 0.00 | 0.00 |
| ATOM | 18 | H41  | RC5 | 1 | -7.263  | 23.387 | -2.631  | 0.00 | 0.00 |
| ATOM | 19 | H42  | RC5 | 1 | -6.550  | 24.683 | -3.437  | 0.00 | 0.00 |
| ATOM | 20 | N3   | RC5 | 1 | -7.299  | 24.188 | -5.562  | 0.00 | 0.00 |
| ATOM | 21 | C2   | RC5 | 1 | -7.807  | 23.841 | -6.750  | 0.00 | 0.00 |
| ATOM | 22 | O2   | RC5 | 1 | -7.538  | 24.509 | -7.683  | 0.00 | 0.00 |
| ATOM | 23 | C3'  | RC5 | 1 | -8.708  | 20.422 | -9.151  | 0.00 | 0.00 |
| ATOM | 24 | H3'  | RC5 | 1 | -8.341  | 19.940 | -8.289  | 0.00 | 0.00 |
| ATOM | 25 | C2'  | RC5 | 1 | -8.261  | 21.806 | -9.113  | 0.00 | 0.00 |
| ATOM | 26 | 1H2' | RC5 | 1 | -7.288  | 21.865 | -8.746  | 0.00 | 0.00 |
| ATOM | 27 | O2'  | RC5 | 1 | -8.359  | 22.385 | -10.349 | 0.00 | 0.00 |
| ATOM | 28 | 2HO' | RC5 | 1 | -8.046  | 21.918 | -10.857 | 0.00 | 0.00 |
| ATOM | 29 | O3'  | RC5 | 1 | -8.378  | 19.771 | -10.321 | 0.00 | 0.00 |
| ATOM | 30 | P    | RU  | 2 | -7.044  | 19.021 | -10.440 | 0.00 | 0.00 |
| ATOM | 31 | O1P  | RU  | 2 | -7.050  | 18.395 | -11.713 | 0.00 | 0.00 |
| ATOM | 32 | O2P  | RU  | 2 | -6.845  | 18.227 | -9.265  | 0.00 | 0.00 |
| ATOM | 33 | O5'  | RU  | 2 | -5.959  | 20.102 | -10.422 | 0.00 | 0.00 |
| ATOM | 34 | C5'  | RU  | 2 | -5.654  | 20.795 | -11.546 | 0.00 | 0.00 |
| ATOM | 35 | 1H5' | RU  | 2 | -6.518  | 21.262 | -11.951 | 0.00 | 0.00 |
| ATOM | 36 | 2H5' | RU  | 2 | -5.284  | 20.143 | -12.255 | 0.00 | 0.00 |
| ATOM | 37 | C4'  | RU  | 2 | -4.622  | 21.811 | -11.256 | 0.00 | 0.00 |
| ATOM | 38 | H4'  | RU  | 2 | -4.433  | 22.306 | -12.161 | 0.00 | 0.00 |
| ATOM | 39 | O4'  | RU  | 2 | -5.043  | 22.726 | -10.345 | 0.00 | 0.00 |
| ATOM | 40 | C1'  | RU  | 2 | -3.944  | 23.187 | -9.596  | 0.00 | 0.00 |
| ATOM | 41 | H1'  | RU  | 2 | -3.836  | 24.219 | -9.749  | 0.00 | 0.00 |
| ATOM | 42 | N1   | RU  | 2 | -4.055  | 22.932 | -8.170  | 0.00 | 0.00 |
| ATOM | 43 | C6   | RU  | 2 | -4.766  | 21.924 | -7.684  | 0.00 | 0.00 |
| ATOM | 44 | H6   | RU  | 2 | -5.223  | 21.258 | -8.344  | 0.00 | 0.00 |
| ATOM | 45 | C5   | RU  | 2 | -4.870  | 21.763 | -6.371  | 0.00 | 0.00 |
| ATOM | 46 | H5   | RU  | 2 | -5.429  | 20.984 | -5.996  | 0.00 | 0.00 |
| ATOM | 47 | C4   | RU  | 2 | -4.251  | 22.618 | -5.449  | 0.00 | 0.00 |
| ATOM | 48 | O4   | RU  | 2 | -4.311  | 22.549 | -4.260  | 0.00 | 0.00 |
| ATOM | 49 | N3   | RU  | 2 | -3.531  | 23.560 | -6.007  | 0.00 | 0.00 |
| ATOM | 50 | H3   | RU  | 2 | -3.058  | 24.149 | -5.393  | 0.00 | 0.00 |
| ATOM | 51 | C2   | RU  | 2 | -3.378  | 23.749 | -7.321  | 0.00 | 0.00 |
| ATOM | 52 | O2   | RU  | 2 | -2.664  | 24.605 | -7.685  | 0.00 | 0.00 |
| ATOM | 53 | C3'  | RU  | 2 | -3.323  | 21.283 | -10.689 | 0.00 | 0.00 |
| ATOM | 54 | H3'  | RU  | 2 | -3.521  | 20.619 | -9.904  | 0.00 | 0.00 |
| ATOM | 55 | C2'  | RU  | 2 | -2.739  | 22.509 | -10.125 | 0.00 | 0.00 |
| ATOM | 56 | 1H2' | RU  | 2 | -2.025  | 22.285 | -9.361  | 0.00 | 0.00 |
| ATOM | 57 | O2'  | RU  | 2 | -2.208  | 23.323 | -11.082 | 0.00 | 0.00 |
| ATOM | 58 | 2HO' | RU  | 2 | -1.847  | 23.097 | -11.380 | 0.00 | 0.00 |
| ATOM | 59 | O3'  | RU  | 2 | -2.545  | 20.696 | -11.624 | 0.00 | 0.00 |
| ATOM | 60 | P    | RU  | 3 | -1.459  | 19.673 | -11.243 | 0.00 | 0.00 |
| ATOM | 61 | O1P  | RU  | 3 | -0.903  | 19.226 | -12.441 | 0.00 | 0.00 |

|      |     |      |    |   |        |        |         |      |      |
|------|-----|------|----|---|--------|--------|---------|------|------|
| ATOM | 62  | O2P  | RU | 3 | -2.034 | 18.737 | -10.384 | 0.00 | 0.00 |
| ATOM | 63  | O5'  | RU | 3 | -0.351 | 20.396 | -10.449 | 0.00 | 0.00 |
| ATOM | 64  | C5'  | RU | 3 | 0.526  | 21.239 | -11.035 | 0.00 | 0.00 |
| ATOM | 65  | 1H5' | RU | 3 | -0.021 | 21.942 | -11.610 | 0.00 | 0.00 |
| ATOM | 66  | 2H5' | RU | 3 | 1.156  | 20.707 | -11.658 | 0.00 | 0.00 |
| ATOM | 67  | C4'  | RU | 3 | 1.378  | 21.944 | -10.035 | 0.00 | 0.00 |
| ATOM | 68  | H4'  | RU | 3 | 1.995  | 22.607 | -10.554 | 0.00 | 0.00 |
| ATOM | 69  | O4'  | RU | 3 | 0.621  | 22.673 | -9.152  | 0.00 | 0.00 |
| ATOM | 70  | C1'  | RU | 3 | 1.329  | 22.764 | -7.937  | 0.00 | 0.00 |
| ATOM | 71  | H1'  | RU | 3 | 1.617  | 23.779 | -7.773  | 0.00 | 0.00 |
| ATOM | 72  | N1   | RU | 3 | 0.524  | 22.328 | -6.801  | 0.00 | 0.00 |
| ATOM | 73  | C6   | RU | 3 | -0.413 | 21.358 | -6.916  | 0.00 | 0.00 |
| ATOM | 74  | H6   | RU | 3 | -0.585 | 20.910 | -7.854  | 0.00 | 0.00 |
| ATOM | 75  | C5   | RU | 3 | -1.106 | 20.953 | -5.850  | 0.00 | 0.00 |
| ATOM | 76  | H5   | RU | 3 | -1.833 | 20.197 | -5.940  | 0.00 | 0.00 |
| ATOM | 77  | C4   | RU | 3 | -0.887 | 21.516 | -4.573  | 0.00 | 0.00 |
| ATOM | 78  | O4   | RU | 3 | -1.476 | 21.214 | -3.573  | 0.00 | 0.00 |
| ATOM | 79  | N3   | RU | 3 | 0.068  | 22.457 | -4.534  | 0.00 | 0.00 |
| ATOM | 80  | H3   | RU | 3 | 0.272  | 22.848 | -3.655  | 0.00 | 0.00 |
| ATOM | 81  | C2   | RU | 3 | 0.803  | 22.886 | -5.576  | 0.00 | 0.00 |
| ATOM | 82  | O2   | RU | 3 | 1.662  | 23.710 | -5.394  | 0.00 | 0.00 |
| ATOM | 83  | C3'  | RU | 3 | 2.274  | 21.048 | -9.220  | 0.00 | 0.00 |
| ATOM | 84  | H3'  | RU | 3 | 1.714  | 20.228 | -8.884  | 0.00 | 0.00 |
| ATOM | 85  | C2'  | RU | 3 | 2.589  | 21.935 | -8.068  | 0.00 | 0.00 |
| ATOM | 86  | 1H2' | RU | 3 | 2.787  | 21.355 | -7.209  | 0.00 | 0.00 |
| ATOM | 87  | O2'  | RU | 3 | 3.653  | 22.770 | -8.318  | 0.00 | 0.00 |
| ATOM | 88  | 2HO' | RU | 3 | 4.371  | 22.263 | -8.365  | 0.00 | 0.00 |
| ATOM | 89  | O3'  | RU | 3 | 3.394  | 20.622 | -9.908  | 0.00 | 0.00 |
| ATOM | 90  | P    | RG | 4 | 4.375  | 19.565 | -9.328  | 0.00 | 0.00 |
| ATOM | 91  | O1P  | RG | 4 | 5.314  | 19.235 | -10.334 | 0.00 | 0.00 |
| ATOM | 92  | O2P  | RG | 4 | 3.595  | 18.539 | -8.742  | 0.00 | 0.00 |
| ATOM | 93  | O5'  | RG | 4 | 5.154  | 20.330 | -8.236  | 0.00 | 0.00 |
| ATOM | 94  | C5'  | RG | 4 | 5.631  | 19.727 | -7.110  | 0.00 | 0.00 |
| ATOM | 95  | 1H5' | RG | 4 | 6.438  | 19.094 | -7.359  | 0.00 | 0.00 |
| ATOM | 96  | 2H5' | RG | 4 | 4.875  | 19.148 | -6.685  | 0.00 | 0.00 |
| ATOM | 97  | C4'  | RG | 4 | 6.103  | 20.744 | -6.128  | 0.00 | 0.00 |
| ATOM | 98  | H4'  | RG | 4 | 6.834  | 21.358 | -6.588  | 0.00 | 0.00 |
| ATOM | 99  | O4'  | RG | 4 | 5.038  | 21.528 | -5.676  | 0.00 | 0.00 |
| ATOM | 100 | C1'  | RG | 4 | 5.191  | 21.785 | -4.302  | 0.00 | 0.00 |
| ATOM | 101 | H1'  | RG | 4 | 5.191  | 22.842 | -4.114  | 0.00 | 0.00 |
| ATOM | 102 | N9   | RG | 4 | 4.061  | 21.182 | -3.558  | 0.00 | 0.00 |
| ATOM | 103 | C8   | RG | 4 | 3.044  | 20.405 | -4.036  | 0.00 | 0.00 |
| ATOM | 104 | H8   | RG | 4 | 2.989  | 20.095 | -5.052  | 0.00 | 0.00 |
| ATOM | 105 | N7   | RG | 4 | 2.151  | 20.089 | -3.154  | 0.00 | 0.00 |
| ATOM | 106 | C5   | RG | 4 | 2.609  | 20.704 | -1.994  | 0.00 | 0.00 |
| ATOM | 107 | C6   | RG | 4 | 2.081  | 20.730 | -0.666  | 0.00 | 0.00 |
| ATOM | 108 | O6   | RG | 4 | 1.049  | 20.243 | -0.244  | 0.00 | 0.00 |
| ATOM | 109 | N1   | RG | 4 | 2.869  | 21.413 | 0.226   | 0.00 | 0.00 |
| ATOM | 110 | H1   | RG | 4 | 2.569  | 21.440 | 1.173   | 0.00 | 0.00 |
| ATOM | 111 | C2   | RG | 4 | 4.013  | 22.032 | -0.117  | 0.00 | 0.00 |
| ATOM | 112 | N2   | RG | 4 | 4.667  | 22.609 | 0.836   | 0.00 | 0.00 |
| ATOM | 113 | H21  | RG | 4 | 4.354  | 22.505 | 1.776   | 0.00 | 0.00 |
| ATOM | 114 | H22  | RG | 4 | 5.518  | 23.068 | 0.628   | 0.00 | 0.00 |
| ATOM | 115 | N3   | RG | 4 | 4.524  | 22.069 | -1.335  | 0.00 | 0.00 |
| ATOM | 116 | C4   | RG | 4 | 3.784  | 21.366 | -2.231  | 0.00 | 0.00 |
| ATOM | 117 | C3'  | RG | 4 | 6.743  | 20.119 | -4.920  | 0.00 | 0.00 |
| ATOM | 118 | H3'  | RG | 4 | 6.176  | 19.270 | -4.623  | 0.00 | 0.00 |
| ATOM | 119 | C2'  | RG | 4 | 6.533  | 21.211 | -3.901  | 0.00 | 0.00 |
| ATOM | 120 | 1H2' | RG | 4 | 6.515  | 20.824 | -2.907  | 0.00 | 0.00 |
| ATOM | 121 | O2'  | RG | 4 | 7.501  | 22.219 | -3.983  | 0.00 | 0.00 |
| ATOM | 122 | 2HO' | RG | 4 | 7.981  | 22.185 | -3.822  | 0.00 | 0.00 |
| ATOM | 123 | O3'  | RG | 4 | 8.092  | 19.810 | -5.162  | 0.00 | 0.00 |
| ATOM | 124 | P    | RC | 5 | 8.776  | 18.557 | -4.527  | 0.00 | 0.00 |
| ATOM | 125 | O1P  | RC | 5 | 10.117 | 18.456 | -5.068  | 0.00 | 0.00 |
| ATOM | 126 | O2P  | RC | 5 | 7.880  | 17.430 | -4.667  | 0.00 | 0.00 |
| ATOM | 127 | O5'  | RC | 5 | 8.892  | 18.869 | -3.003  | 0.00 | 0.00 |
| ATOM | 128 | C5'  | RC | 5 | 9.871  | 19.729 | -2.502  | 0.00 | 0.00 |
| ATOM | 129 | 1H5' | RC | 5 | 9.845  | 20.675 | -3.006  | 0.00 | 0.00 |

|      |     |      |    |   |        |        |        |      |      |
|------|-----|------|----|---|--------|--------|--------|------|------|
| ATOM | 130 | 2H5' | RC | 5 | 10.840 | 19.290 | -2.648 | 0.00 | 0.00 |
| ATOM | 131 | C4'  | RC | 5 | 9.658  | 19.977 | -1.019 | 0.00 | 0.00 |
| ATOM | 132 | H4'  | RC | 5 | 10.451 | 20.615 | -0.661 | 0.00 | 0.00 |
| ATOM | 133 | O4'  | RC | 5 | 8.428  | 20.626 | -0.777 | 0.00 | 0.00 |
| ATOM | 134 | C1'  | RC | 5 | 7.907  | 20.190 | 0.465  | 0.00 | 0.00 |
| ATOM | 135 | H1'  | RC | 5 | 7.760  | 21.040 | 1.113  | 0.00 | 0.00 |
| ATOM | 136 | N1   | RC | 5 | 6.617  | 19.477 | 0.326  | 0.00 | 0.00 |
| ATOM | 137 | C6   | RC | 5 | 6.229  | 18.903 | -0.844 | 0.00 | 0.00 |
| ATOM | 138 | H6   | RC | 5 | 6.864  | 18.960 | -1.698 | 0.00 | 0.00 |
| ATOM | 139 | C5   | RC | 5 | 5.043  | 18.276 | -0.932 | 0.00 | 0.00 |
| ATOM | 140 | H5   | RC | 5 | 4.743  | 17.841 | -1.858 | 0.00 | 0.00 |
| ATOM | 141 | C4   | RC | 5 | 4.243  | 18.229 | 0.218  | 0.00 | 0.00 |
| ATOM | 142 | N4   | RC | 5 | 3.089  | 17.662 | 0.195  | 0.00 | 0.00 |
| ATOM | 143 | H41  | RC | 5 | 2.556  | 17.685 | 1.033  | 0.00 | 0.00 |
| ATOM | 144 | H42  | RC | 5 | 2.741  | 17.280 | -0.646 | 0.00 | 0.00 |
| ATOM | 145 | N3   | RC | 5 | 4.608  | 18.727 | 1.371  | 0.00 | 0.00 |
| ATOM | 146 | C2   | RC | 5 | 5.795  | 19.354 | 1.440  | 0.00 | 0.00 |
| ATOM | 147 | O2   | RC | 5 | 6.124  | 19.795 | 2.526  | 0.00 | 0.00 |
| ATOM | 148 | C3'  | RC | 5 | 9.650  | 18.724 | -0.159 | 0.00 | 0.00 |
| ATOM | 149 | H3'  | RC | 5 | 9.016  | 17.994 | -0.629 | 0.00 | 0.00 |
| ATOM | 150 | C2'  | RC | 5 | 8.966  | 19.282 | 1.073  | 0.00 | 0.00 |
| ATOM | 151 | 1H2' | RC | 5 | 8.519  | 18.491 | 1.650  | 0.00 | 0.00 |
| ATOM | 152 | O2'  | RC | 5 | 9.816  | 20.053 | 1.869  | 0.00 | 0.00 |
| ATOM | 153 | 2HO' | RC | 5 | 10.463 | 19.844 | 1.946  | 0.00 | 0.00 |
| ATOM | 154 | O3'  | RC | 5 | 10.917 | 18.193 | 0.135  | 0.00 | 0.00 |
| ATOM | 155 | P    | RU | 6 | 11.103 | 16.659 | 0.418  | 0.00 | 0.00 |
| ATOM | 156 | O1P  | RU | 6 | 12.500 | 16.442 | 0.734  | 0.00 | 0.00 |
| ATOM | 157 | O2P  | RU | 6 | 10.525 | 15.941 | -0.702 | 0.00 | 0.00 |
| ATOM | 158 | O5'  | RU | 6 | 10.250 | 16.323 | 1.699  | 0.00 | 0.00 |
| ATOM | 159 | C5'  | RU | 6 | 10.636 | 16.727 | 2.986  | 0.00 | 0.00 |
| ATOM | 160 | 1H5' | RU | 6 | 10.916 | 17.763 | 2.972  | 0.00 | 0.00 |
| ATOM | 161 | 2H5' | RU | 6 | 11.479 | 16.146 | 3.313  | 0.00 | 0.00 |
| ATOM | 162 | C4'  | RU | 6 | 9.527  | 16.564 | 4.008  | 0.00 | 0.00 |
| ATOM | 163 | H4'  | RU | 6 | 9.846  | 17.034 | 4.922  | 0.00 | 0.00 |
| ATOM | 164 | O4'  | RU | 6 | 8.338  | 17.196 | 3.589  | 0.00 | 0.00 |
| ATOM | 165 | C1'  | RU | 6 | 7.216  | 16.454 | 4.022  | 0.00 | 0.00 |
| ATOM | 166 | H1'  | RU | 6 | 6.577  | 17.091 | 4.612  | 0.00 | 0.00 |
| ATOM | 167 | N1   | RU | 6 | 6.397  | 15.890 | 2.913  | 0.00 | 0.00 |
| ATOM | 168 | C6   | RU | 6 | 6.872  | 15.747 | 1.647  | 0.00 | 0.00 |
| ATOM | 169 | H6   | RU | 6 | 7.871  | 16.044 | 1.431  | 0.00 | 0.00 |
| ATOM | 170 | C5   | RU | 6 | 6.093  | 15.252 | 0.665  | 0.00 | 0.00 |
| ATOM | 171 | H5   | RU | 6 | 6.467  | 15.163 | -0.327 | 0.00 | 0.00 |
| ATOM | 172 | C4   | RU | 6 | 4.743  | 14.861 | 0.907  | 0.00 | 0.00 |
| ATOM | 173 | O4   | RU | 6 | 3.989  | 14.404 | 0.073  | 0.00 | 0.00 |
| ATOM | 174 | N3   | RU | 6 | 4.332  | 15.036 | 2.189  | 0.00 | 0.00 |
| ATOM | 175 | H3   | RU | 6 | 3.402  | 14.761 | 2.406  | 0.00 | 0.00 |
| ATOM | 176 | C2   | RU | 6 | 5.104  | 15.494 | 3.216  | 0.00 | 0.00 |
| ATOM | 177 | O2   | RU | 6 | 4.658  | 15.509 | 4.350  | 0.00 | 0.00 |
| ATOM | 178 | C3'  | RU | 6 | 9.146  | 15.130 | 4.337  | 0.00 | 0.00 |
| ATOM | 179 | H3'  | RU | 6 | 9.082  | 14.570 | 3.422  | 0.00 | 0.00 |
| ATOM | 180 | C2'  | RU | 6 | 7.763  | 15.359 | 4.925  | 0.00 | 0.00 |
| ATOM | 181 | 1H2' | RU | 6 | 7.166  | 14.464 | 4.892  | 0.00 | 0.00 |
| ATOM | 182 | O2'  | RU | 6 | 7.805  | 15.889 | 6.229  | 0.00 | 0.00 |
| ATOM | 183 | 2HO' | RU | 6 | 8.235  | 15.854 | 6.551  | 0.00 | 0.00 |
| ATOM | 184 | O3'  | RU | 6 | 10.024 | 14.525 | 5.245  | 0.00 | 0.00 |
| ATOM | 185 | P    | RG | 7 | 10.065 | 12.962 | 5.437  | 0.00 | 0.00 |
| ATOM | 186 | O1P  | RG | 7 | 11.116 | 12.683 | 6.392  | 0.00 | 0.00 |
| ATOM | 187 | O2P  | RG | 7 | 10.135 | 12.359 | 4.130  | 0.00 | 0.00 |
| ATOM | 188 | O5'  | RG | 7 | 8.700  | 12.515 | 6.079  | 0.00 | 0.00 |
| ATOM | 189 | C5'  | RG | 7 | 8.365  | 12.798 | 7.407  | 0.00 | 0.00 |
| ATOM | 190 | 1H5' | RG | 7 | 8.345  | 13.859 | 7.550  | 0.00 | 0.00 |
| ATOM | 191 | 2H5' | RG | 7 | 9.096  | 12.392 | 8.065  | 0.00 | 0.00 |
| ATOM | 192 | C4'  | RG | 7 | 7.020  | 12.224 | 7.797  | 0.00 | 0.00 |
| ATOM | 193 | H4'  | RG | 7 | 6.766  | 12.627 | 8.758  | 0.00 | 0.00 |
| ATOM | 194 | O4'  | RG | 7 | 6.025  | 12.603 | 6.864  | 0.00 | 0.00 |
| ATOM | 195 | C1'  | RG | 7 | 5.431  | 11.431 | 6.366  | 0.00 | 0.00 |
| ATOM | 196 | H1'  | RG | 7 | 4.568  | 11.191 | 6.967  | 0.00 | 0.00 |
| ATOM | 197 | N9   | RG | 7 | 5.002  | 11.587 | 4.967  | 0.00 | 0.00 |

|      |     |      |    |   |        |        |        |      |      |
|------|-----|------|----|---|--------|--------|--------|------|------|
| ATOM | 198 | C8   | RG | 7 | 5.747  | 11.912 | 3.874  | 0.00 | 0.00 |
| ATOM | 199 | H8   | RG | 7 | 6.786  | 12.150 | 3.940  | 0.00 | 0.00 |
| ATOM | 200 | N7   | RG | 7 | 5.094  | 11.910 | 2.753  | 0.00 | 0.00 |
| ATOM | 201 | C5   | RG | 7 | 3.811  | 11.519 | 3.129  | 0.00 | 0.00 |
| ATOM | 202 | C6   | RG | 7 | 2.617  | 11.311 | 2.368  | 0.00 | 0.00 |
| ATOM | 203 | O6   | RG | 7 | 2.436  | 11.406 | 1.164  | 0.00 | 0.00 |
| ATOM | 204 | N1   | RG | 7 | 1.551  | 10.914 | 3.127  | 0.00 | 0.00 |
| ATOM | 205 | H1   | RG | 7 | 0.678  | 10.777 | 2.668  | 0.00 | 0.00 |
| ATOM | 206 | C2   | RG | 7 | 1.610  | 10.712 | 4.453  | 0.00 | 0.00 |
| ATOM | 207 | N2   | RG | 7 | 0.519  | 10.351 | 5.033  | 0.00 | 0.00 |
| ATOM | 208 | H21  | RG | 7 | -0.309 | 10.218 | 4.502  | 0.00 | 0.00 |
| ATOM | 209 | H22  | RG | 7 | 0.551  | 10.204 | 6.006  | 0.00 | 0.00 |
| ATOM | 210 | N3   | RG | 7 | 2.687  | 10.884 | 5.200  | 0.00 | 0.00 |
| ATOM | 211 | C4   | RG | 7 | 3.757  | 11.305 | 4.481  | 0.00 | 0.00 |
| ATOM | 212 | C3'  | RG | 7 | 7.027  | 10.704 | 7.883  | 0.00 | 0.00 |
| ATOM | 213 | H3'  | RG | 7 | 8.019  | 10.311 | 8.010  | 0.00 | 0.00 |
| ATOM | 214 | C2'  | RG | 7 | 6.460  | 10.335 | 6.532  | 0.00 | 0.00 |
| ATOM | 215 | 1H2' | RG | 7 | 7.229  | 10.443 | 5.785  | 0.00 | 0.00 |
| ATOM | 216 | O2'  | RG | 7 | 5.917  | 9.042  | 6.493  | 0.00 | 0.00 |
| ATOM | 217 | 2HO' | RG | 7 | 5.652  | 8.829  | 7.020  | 0.00 | 0.00 |
| ATOM | 218 | O3'  | RG | 7 | 6.165  | 10.256 | 8.902  | 0.00 | 0.00 |
| ATOM | 219 | P    | RA | 8 | 6.638  | 10.125 | 10.397 | 0.00 | 0.00 |
| ATOM | 220 | O1P  | RA | 8 | 5.450  | 10.044 | 11.222 | 0.00 | 0.00 |
| ATOM | 221 | O2P  | RA | 8 | 7.612  | 11.167 | 10.679 | 0.00 | 0.00 |
| ATOM | 222 | O5'  | RA | 8 | 7.394  | 8.752  | 10.497 | 0.00 | 0.00 |
| ATOM | 223 | C5'  | RA | 8 | 6.771  | 7.542  | 10.226 | 0.00 | 0.00 |
| ATOM | 224 | 1H5' | RA | 8 | 6.637  | 7.438  | 9.192  | 0.00 | 0.00 |
| ATOM | 225 | 2H5' | RA | 8 | 5.838  | 7.501  | 10.687 | 0.00 | 0.00 |
| ATOM | 226 | C4'  | RA | 8 | 7.620  | 6.433  | 10.741 | 0.00 | 0.00 |
| ATOM | 227 | H4'  | RA | 8 | 8.618  | 6.631  | 10.476 | 0.00 | 0.00 |
| ATOM | 228 | O4'  | RA | 8 | 7.538  | 6.389  | 12.123 | 0.00 | 0.00 |
| ATOM | 229 | C1'  | RA | 8 | 7.609  | 5.069  | 12.529 | 0.00 | 0.00 |
| ATOM | 230 | H1'  | RA | 8 | 8.624  | 4.768  | 12.510 | 0.00 | 0.00 |
| ATOM | 231 | N9   | RA | 8 | 7.058  | 4.811  | 13.855 | 0.00 | 0.00 |
| ATOM | 232 | C8   | RA | 8 | 7.564  | 4.011  | 14.790 | 0.00 | 0.00 |
| ATOM | 233 | H8   | RA | 8 | 8.474  | 3.519  | 14.649 | 0.00 | 0.00 |
| ATOM | 234 | N7   | RA | 8 | 6.852  | 3.892  | 15.853 | 0.00 | 0.00 |
| ATOM | 235 | C5   | RA | 8 | 5.782  | 4.676  | 15.597 | 0.00 | 0.00 |
| ATOM | 236 | C6   | RA | 8 | 4.641  | 5.026  | 16.299 | 0.00 | 0.00 |
| ATOM | 237 | N6   | RA | 8 | 4.329  | 4.614  | 17.482 | 0.00 | 0.00 |
| ATOM | 238 | H61  | RA | 8 | 3.501  | 4.921  | 17.877 | 0.00 | 0.00 |
| ATOM | 239 | H62  | RA | 8 | 4.919  | 4.010  | 17.929 | 0.00 | 0.00 |
| ATOM | 240 | N1   | RA | 8 | 3.771  | 5.826  | 15.796 | 0.00 | 0.00 |
| ATOM | 241 | C2   | RA | 8 | 4.002  | 6.275  | 14.604 | 0.00 | 0.00 |
| ATOM | 242 | H2   | RA | 8 | 3.275  | 6.904  | 14.210 | 0.00 | 0.00 |
| ATOM | 243 | N3   | RA | 8 | 5.013  | 6.041  | 13.815 | 0.00 | 0.00 |
| ATOM | 244 | C4   | RA | 8 | 5.888  | 5.231  | 14.378 | 0.00 | 0.00 |
| ATOM | 245 | C3'  | RA | 8 | 7.256  | 5.052  | 10.216 | 0.00 | 0.00 |
| ATOM | 246 | H3'  | RA | 8 | 6.420  | 5.097  | 9.547  | 0.00 | 0.00 |
| ATOM | 247 | C2'  | RA | 8 | 6.890  | 4.296  | 11.468 | 0.00 | 0.00 |
| ATOM | 248 | 1H2' | RA | 8 | 5.848  | 4.369  | 11.627 | 0.00 | 0.00 |
| ATOM | 249 | O2'  | RA | 8 | 7.288  | 2.968  | 11.506 | 0.00 | 0.00 |
| ATOM | 250 | 2HO' | RA | 8 | 6.887  | 2.501  | 10.881 | 0.00 | 0.00 |
| ATOM | 251 | O3'  | RA | 8 | 8.377  | 4.509  | 9.584  | 0.00 | 0.00 |
| ATOM | 252 | P    | RA | 9 | 8.320  | 3.916  | 8.145  | 0.00 | 0.00 |
| ATOM | 253 | O1P  | RA | 9 | 9.680  | 3.671  | 7.719  | 0.00 | 0.00 |
| ATOM | 254 | O2P  | RA | 9 | 7.493  | 4.771  | 7.339  | 0.00 | 0.00 |
| ATOM | 255 | O5'  | RA | 9 | 7.595  | 2.547  | 8.310  | 0.00 | 0.00 |
| ATOM | 256 | C5'  | RA | 9 | 8.258  | 1.421  | 8.778  | 0.00 | 0.00 |
| ATOM | 257 | 1H5' | RA | 9 | 8.770  | 1.669  | 9.686  | 0.00 | 0.00 |
| ATOM | 258 | 2H5' | RA | 9 | 8.977  | 1.109  | 8.055  | 0.00 | 0.00 |
| ATOM | 259 | C4'  | RA | 9 | 7.313  | 0.271  | 9.029  | 0.00 | 0.00 |
| ATOM | 260 | H4'  | RA | 9 | 7.899  | -0.551 | 9.376  | 0.00 | 0.00 |
| ATOM | 261 | O4'  | RA | 9 | 6.392  | 0.619  | 10.025 | 0.00 | 0.00 |
| ATOM | 262 | C1'  | RA | 9 | 5.104  | 0.251  | 9.618  | 0.00 | 0.00 |
| ATOM | 263 | H1'  | RA | 9 | 4.929  | -0.773 | 9.882  | 0.00 | 0.00 |
| ATOM | 264 | N9   | RA | 9 | 4.069  | 1.106  | 10.227 | 0.00 | 0.00 |
| ATOM | 265 | C8   | RA | 9 | 2.944  | 1.620  | 9.662  | 0.00 | 0.00 |

|      |     |      |    |    |        |        |        |      |      |
|------|-----|------|----|----|--------|--------|--------|------|------|
| ATOM | 266 | H8   | RA | 9  | 2.708  | 1.481  | 8.639  | 0.00 | 0.00 |
| ATOM | 267 | N7   | RA | 9  | 2.199  | 2.303  | 10.460 | 0.00 | 0.00 |
| ATOM | 268 | C5   | RA | 9  | 2.869  | 2.204  | 11.661 | 0.00 | 0.00 |
| ATOM | 269 | C6   | RA | 9  | 2.628  | 2.668  | 12.948 | 0.00 | 0.00 |
| ATOM | 270 | N6   | RA | 9  | 1.614  | 3.388  | 13.308 | 0.00 | 0.00 |
| ATOM | 271 | H61  | RA | 9  | 1.561  | 3.681  | 14.238 | 0.00 | 0.00 |
| ATOM | 272 | H62  | RA | 9  | 0.937  | 3.631  | 12.648 | 0.00 | 0.00 |
| ATOM | 273 | N1   | RA | 9  | 3.455  | 2.397  | 13.931 | 0.00 | 0.00 |
| ATOM | 274 | C2   | RA | 9  | 4.506  | 1.669  | 13.662 | 0.00 | 0.00 |
| ATOM | 275 | H2   | RA | 9  | 5.154  | 1.460  | 14.472 | 0.00 | 0.00 |
| ATOM | 276 | N3   | RA | 9  | 4.854  | 1.148  | 12.519 | 0.00 | 0.00 |
| ATOM | 277 | C4   | RA | 9  | 3.997  | 1.465  | 11.536 | 0.00 | 0.00 |
| ATOM | 278 | C3'  | RA | 9  | 6.544  | -0.168 | 7.790  | 0.00 | 0.00 |
| ATOM | 279 | H3'  | RA | 9  | 6.941  | 0.291  | 6.909  | 0.00 | 0.00 |
| ATOM | 280 | C2'  | RA | 9  | 5.163  | 0.348  | 8.110  | 0.00 | 0.00 |
| ATOM | 281 | 1H2' | RA | 9  | 5.109  | 1.374  | 7.835  | 0.00 | 0.00 |
| ATOM | 282 | O2'  | RA | 9  | 4.135  | -0.365 | 7.495  | 0.00 | 0.00 |
| ATOM | 283 | 2HO' | RA | 9  | 4.476  | -0.904 | 6.864  | 0.00 | 0.00 |
| ATOM | 284 | O3'  | RA | 9  | 6.628  | -1.569 | 7.745  | 0.00 | 0.00 |
| ATOM | 285 | P    | RG | 10 | 6.475  | -2.358 | 6.404  | 0.00 | 0.00 |
| ATOM | 286 | O1P  | RG | 10 | 5.311  | -1.864 | 5.698  | 0.00 | 0.00 |
| ATOM | 287 | O2P  | RG | 10 | 6.546  | -3.760 | 6.725  | 0.00 | 0.00 |
| ATOM | 288 | O5'  | RG | 10 | 7.725  | -1.958 | 5.562  | 0.00 | 0.00 |
| ATOM | 289 | C5'  | RG | 10 | 9.023  | -2.298 | 5.945  | 0.00 | 0.00 |
| ATOM | 290 | 1H5' | RG | 10 | 9.026  | -2.887 | 6.829  | 0.00 | 0.00 |
| ATOM | 291 | 2H5' | RG | 10 | 9.561  | -1.404 | 6.148  | 0.00 | 0.00 |
| ATOM | 292 | C4'  | RG | 10 | 9.754  | -3.075 | 4.869  | 0.00 | 0.00 |
| ATOM | 293 | H4'  | RG | 10 | 10.760 | -3.230 | 5.207  | 0.00 | 0.00 |
| ATOM | 294 | O4'  | RG | 10 | 9.173  | -4.337 | 4.646  | 0.00 | 0.00 |
| ATOM | 295 | C1'  | RG | 10 | 9.298  | -4.686 | 3.284  | 0.00 | 0.00 |
| ATOM | 296 | H1'  | RG | 10 | 9.832  | -5.614 | 3.188  | 0.00 | 0.00 |
| ATOM | 297 | N9   | RG | 10 | 7.976  | -4.860 | 2.656  | 0.00 | 0.00 |
| ATOM | 298 | C8   | RG | 10 | 6.757  | -4.414 | 3.068  | 0.00 | 0.00 |
| ATOM | 299 | H8   | RG | 10 | 6.644  | -3.839 | 3.956  | 0.00 | 0.00 |
| ATOM | 300 | N7   | RG | 10 | 5.763  | -4.782 | 2.323  | 0.00 | 0.00 |
| ATOM | 301 | C5   | RG | 10 | 6.366  | -5.527 | 1.316  | 0.00 | 0.00 |
| ATOM | 302 | C6   | RG | 10 | 5.827  | -6.233 | 0.195  | 0.00 | 0.00 |
| ATOM | 303 | O6   | RG | 10 | 4.659  | -6.391 | -0.126 | 0.00 | 0.00 |
| ATOM | 304 | N1   | RG | 10 | 6.780  | -6.812 | -0.600 | 0.00 | 0.00 |
| ATOM | 305 | H1   | RG | 10 | 6.475  | -7.292 | -1.416 | 0.00 | 0.00 |
| ATOM | 306 | C2   | RG | 10 | 8.093  | -6.752 | -0.345 | 0.00 | 0.00 |
| ATOM | 307 | N2   | RG | 10 | 8.881  | -7.316 | -1.190 | 0.00 | 0.00 |
| ATOM | 308 | H21  | RG | 10 | 8.508  | -7.731 | -2.013 | 0.00 | 0.00 |
| ATOM | 309 | H22  | RG | 10 | 9.847  | -7.297 | -1.009 | 0.00 | 0.00 |
| ATOM | 310 | N3   | RG | 10 | 8.634  | -6.156 | 0.700  | 0.00 | 0.00 |
| ATOM | 311 | C4   | RG | 10 | 7.720  | -5.554 | 1.504  | 0.00 | 0.00 |
| ATOM | 312 | C3'  | RG | 10 | 9.814  | -2.386 | 3.516  | 0.00 | 0.00 |
| ATOM | 313 | H3'  | RG | 10 | 8.849  | -1.989 | 3.274  | 0.00 | 0.00 |
| ATOM | 314 | C2'  | RG | 10 | 10.093 | -3.578 | 2.623  | 0.00 | 0.00 |
| ATOM | 315 | 1H2' | RG | 10 | 9.754  | -3.399 | 1.622  | 0.00 | 0.00 |
| ATOM | 316 | O2'  | RG | 10 | 11.440 | -3.944 | 2.631  | 0.00 | 0.00 |
| ATOM | 317 | 2HO' | RG | 10 | 11.839 | -3.486 | 2.541  | 0.00 | 0.00 |
| ATOM | 318 | O3'  | RG | 10 | 10.829 | -1.408 | 3.440  | 0.00 | 0.00 |
| ATOM | 319 | P    | RC | 11 | 10.782 | -0.259 | 2.379  | 0.00 | 0.00 |
| ATOM | 320 | O1P  | RC | 11 | 11.988 | 0.547  | 2.564  | 0.00 | 0.00 |
| ATOM | 321 | O2P  | RC | 11 | 9.493  | 0.404  | 2.468  | 0.00 | 0.00 |
| ATOM | 322 | O5'  | RC | 11 | 10.857 | -0.952 | 0.962  | 0.00 | 0.00 |
| ATOM | 323 | C5'  | RC | 11 | 12.077 | -1.365 | 0.411  | 0.00 | 0.00 |
| ATOM | 324 | 1H5' | RC | 11 | 12.575 | -2.039 | 1.078  | 0.00 | 0.00 |
| ATOM | 325 | 2H5' | RC | 11 | 12.709 | -0.508 | 0.272  | 0.00 | 0.00 |
| ATOM | 326 | C4'  | RC | 11 | 11.893 | -2.042 | -0.930 | 0.00 | 0.00 |
| ATOM | 327 | H4'  | RC | 11 | 12.866 | -2.323 | -1.289 | 0.00 | 0.00 |
| ATOM | 328 | O4'  | RC | 11 | 11.100 | -3.211 | -0.856 | 0.00 | 0.00 |
| ATOM | 329 | C1'  | RC | 11 | 10.408 | -3.377 | -2.080 | 0.00 | 0.00 |
| ATOM | 330 | H1'  | RC | 11 | 10.709 | -4.301 | -2.541 | 0.00 | 0.00 |
| ATOM | 331 | N1   | RC | 11 | 8.938  | -3.387 | -1.890 | 0.00 | 0.00 |
| ATOM | 332 | C6   | RC | 11 | 8.340  | -2.729 | -0.859 | 0.00 | 0.00 |
| ATOM | 333 | H6   | RC | 11 | 8.932  | -2.176 | -0.172 | 0.00 | 0.00 |

|      |     |      |    |    |        |        |         |      |      |
|------|-----|------|----|----|--------|--------|---------|------|------|
| ATOM | 334 | C5   | RC | 11 | 7.002  | -2.765 | -0.727  | 0.00 | 0.00 |
| ATOM | 335 | H5   | RC | 11 | 6.523  | -2.252 | 0.071   | 0.00 | 0.00 |
| ATOM | 336 | C4   | RC | 11 | 6.269  | -3.488 | -1.680  | 0.00 | 0.00 |
| ATOM | 337 | N4   | RC | 11 | 4.989  | -3.588 | -1.583  | 0.00 | 0.00 |
| ATOM | 338 | H41  | RC | 11 | 4.526  | -4.147 | -2.257  | 0.00 | 0.00 |
| ATOM | 339 | H42  | RC | 11 | 4.530  | -3.223 | -0.792  | 0.00 | 0.00 |
| ATOM | 340 | N3   | RC | 11 | 6.819  | -4.118 | -2.677  | 0.00 | 0.00 |
| ATOM | 341 | C2   | RC | 11 | 8.150  | -4.061 | -2.809  | 0.00 | 0.00 |
| ATOM | 342 | O2   | RC | 11 | 8.645  | -4.615 | -3.771  | 0.00 | 0.00 |
| ATOM | 343 | C3'  | RC | 11 | 11.242 | -1.172 | -1.979  | 0.00 | 0.00 |
| ATOM | 344 | H3'  | RC | 11 | 10.367 | -0.725 | -1.550  | 0.00 | 0.00 |
| ATOM | 345 | C2'  | RC | 11 | 10.825 | -2.232 | -2.984  | 0.00 | 0.00 |
| ATOM | 346 | 1H2' | RC | 11 | 10.014 | -1.886 | -3.597  | 0.00 | 0.00 |
| ATOM | 347 | O2'  | RC | 11 | 11.898 | -2.681 | -3.767  | 0.00 | 0.00 |
| ATOM | 348 | 2HO' | RC | 11 | 12.014 | -2.472 | -4.228  | 0.00 | 0.00 |
| ATOM | 349 | O3'  | RC | 11 | 12.093 | -0.196 | -2.515  | 0.00 | 0.00 |
| ATOM | 350 | P    | RG | 12 | 11.508 | 1.070  | -3.241  | 0.00 | 0.00 |
| ATOM | 351 | O1P  | RG | 12 | 12.624 | 1.912  | -3.634  | 0.00 | 0.00 |
| ATOM | 352 | O2P  | RG | 12 | 10.458 | 1.640  | -2.416  | 0.00 | 0.00 |
| ATOM | 353 | O5'  | RG | 12 | 10.814 | 0.539  | -4.552  | 0.00 | 0.00 |
| ATOM | 354 | C5'  | RG | 12 | 11.556 | 0.170  | -5.688  | 0.00 | 0.00 |
| ATOM | 355 | 1H5' | RG | 12 | 12.241 | -0.608 | -5.444  | 0.00 | 0.00 |
| ATOM | 356 | 2H5' | RG | 12 | 12.129 | 1.000  | -6.036  | 0.00 | 0.00 |
| ATOM | 357 | C4'  | RG | 12 | 10.672 | -0.301 | -6.822  | 0.00 | 0.00 |
| ATOM | 358 | H4'  | RG | 12 | 11.301 | -0.515 | -7.671  | 0.00 | 0.00 |
| ATOM | 359 | O4'  | RG | 12 | 9.952  | -1.464 | -6.494  | 0.00 | 0.00 |
| ATOM | 360 | C1'  | RG | 12 | 8.697  | -1.423 | -7.145  | 0.00 | 0.00 |
| ATOM | 361 | H1'  | RG | 12 | 8.555  | -2.280 | -7.779  | 0.00 | 0.00 |
| ATOM | 362 | N9   | RG | 12 | 7.618  | -1.413 | -6.143  | 0.00 | 0.00 |
| ATOM | 363 | C8   | RG | 12 | 7.623  | -0.920 | -4.874  | 0.00 | 0.00 |
| ATOM | 364 | H8   | RG | 12 | 8.467  | -0.421 | -4.464  | 0.00 | 0.00 |
| ATOM | 365 | N7   | RG | 12 | 6.527  | -1.108 | -4.217  | 0.00 | 0.00 |
| ATOM | 366 | C5   | RG | 12 | 5.711  | -1.763 | -5.127  | 0.00 | 0.00 |
| ATOM | 367 | C6   | RG | 12 | 4.372  | -2.247 | -5.022  | 0.00 | 0.00 |
| ATOM | 368 | O6   | RG | 12 | 3.607  | -2.246 | -4.075  | 0.00 | 0.00 |
| ATOM | 369 | N1   | RG | 12 | 3.901  | -2.798 | -6.179  | 0.00 | 0.00 |
| ATOM | 370 | H1   | RG | 12 | 2.963  | -3.134 | -6.190  | 0.00 | 0.00 |
| ATOM | 371 | C2   | RG | 12 | 4.622  | -2.883 | -7.302  | 0.00 | 0.00 |
| ATOM | 372 | N2   | RG | 12 | 4.042  | -3.418 | -8.317  | 0.00 | 0.00 |
| ATOM | 373 | H21  | RG | 12 | 3.099  | -3.717 | -8.245  | 0.00 | 0.00 |
| ATOM | 374 | H22  | RG | 12 | 4.573  | -3.521 | -9.133  | 0.00 | 0.00 |
| ATOM | 375 | N3   | RG | 12 | 5.869  | -2.467 | -7.444  | 0.00 | 0.00 |
| ATOM | 376 | C4   | RG | 12 | 6.364  | -1.914 | -6.319  | 0.00 | 0.00 |
| ATOM | 377 | C3'  | RG | 12 | 9.644  | 0.721  | -7.248  | 0.00 | 0.00 |
| ATOM | 378 | H3'  | RG | 12 | 9.150  | 1.123  | -6.378  | 0.00 | 0.00 |
| ATOM | 379 | C2'  | RG | 12 | 8.668  | -0.166 | -7.992  | 0.00 | 0.00 |
| ATOM | 380 | 1H2' | RG | 12 | 7.684  | 0.269  | -8.022  | 0.00 | 0.00 |
| ATOM | 381 | O2'  | RG | 12 | 9.114  | -0.488 | -9.293  | 0.00 | 0.00 |
| ATOM | 382 | 2HO' | RG | 12 | 9.200  | -0.139 | -9.648  | 0.00 | 0.00 |
| ATOM | 383 | O3'  | RG | 12 | 10.179 | 1.746  | -8.055  | 0.00 | 0.00 |
| ATOM | 384 | P    | RC | 13 | 9.549  | 3.181  | -8.055  | 0.00 | 0.00 |
| ATOM | 385 | O1P  | RC | 13 | 10.360 | 3.989  | -8.952  | 0.00 | 0.00 |
| ATOM | 386 | O2P  | RC | 13 | 9.355  | 3.619  | -6.684  | 0.00 | 0.00 |
| ATOM | 387 | O5'  | RC | 13 | 8.124  | 3.006  | -8.682  | 0.00 | 0.00 |
| ATOM | 388 | C5'  | RC | 13 | 7.952  | 2.831  | -10.064 | 0.00 | 0.00 |
| ATOM | 389 | 1H5' | RC | 13 | 8.543  | 2.002  | -10.403 | 0.00 | 0.00 |
| ATOM | 390 | 2H5' | RC | 13 | 8.278  | 3.717  | -10.566 | 0.00 | 0.00 |
| ATOM | 391 | C4'  | RC | 13 | 6.503  | 2.557  | -10.430 | 0.00 | 0.00 |
| ATOM | 392 | H4'  | RC | 13 | 6.435  | 2.487  | -11.504 | 0.00 | 0.00 |
| ATOM | 393 | O4'  | RC | 13 | 6.036  | 1.354  | -9.865  | 0.00 | 0.00 |
| ATOM | 394 | C1'  | RC | 13 | 4.645  | 1.470  | -9.616  | 0.00 | 0.00 |
| ATOM | 395 | H1'  | RC | 13 | 4.115  | 0.738  | -10.200 | 0.00 | 0.00 |
| ATOM | 396 | N1   | RC | 13 | 4.326  | 1.257  | -8.180  | 0.00 | 0.00 |
| ATOM | 397 | C6   | RC | 13 | 5.170  | 1.616  | -7.182  | 0.00 | 0.00 |
| ATOM | 398 | H6   | RC | 13 | 6.127  | 2.018  | -7.417  | 0.00 | 0.00 |
| ATOM | 399 | C5   | RC | 13 | 4.798  | 1.493  | -5.896  | 0.00 | 0.00 |
| ATOM | 400 | H5   | RC | 13 | 5.466  | 1.761  | -5.120  | 0.00 | 0.00 |
| ATOM | 401 | C4   | RC | 13 | 3.528  | 0.974  | -5.629  | 0.00 | 0.00 |

|      |     |      |    |    |        |        |         |      |      |
|------|-----|------|----|----|--------|--------|---------|------|------|
| ATOM | 402 | N4   | RC | 13 | 3.126  | 0.817  | -4.412  | 0.00 | 0.00 |
| ATOM | 403 | H41  | RC | 13 | 2.223  | 0.440  | -4.267  | 0.00 | 0.00 |
| ATOM | 404 | H42  | RC | 13 | 3.715  | 1.065  | -3.669  | 0.00 | 0.00 |
| ATOM | 405 | N3   | RC | 13 | 2.699  | 0.617  | -6.565  | 0.00 | 0.00 |
| ATOM | 406 | C2   | RC | 13 | 3.080  | 0.751  | -7.847  | 0.00 | 0.00 |
| ATOM | 407 | O2   | RC | 13 | 2.288  | 0.419  | -8.704  | 0.00 | 0.00 |
| ATOM | 408 | C3'  | RC | 13 | 5.540  | 3.618  | -9.958  | 0.00 | 0.00 |
| ATOM | 409 | H3'  | RC | 13 | 5.753  | 3.825  | -8.923  | 0.00 | 0.00 |
| ATOM | 410 | C2'  | RC | 13 | 4.230  | 2.863  | -10.056 | 0.00 | 0.00 |
| ATOM | 411 | 1H2' | RC | 13 | 3.487  | 3.291  | -9.407  | 0.00 | 0.00 |
| ATOM | 412 | O2'  | RC | 13 | 3.756  | 2.779  | -11.368 | 0.00 | 0.00 |
| ATOM | 413 | 2HO' | RC | 13 | 3.509  | 3.338  | -11.608 | 0.00 | 0.00 |
| ATOM | 414 | O3'  | RC | 13 | 5.584  | 4.794  | -10.722 | 0.00 | 0.00 |
| ATOM | 415 | P    | RG | 14 | 5.103  | 6.153  | -10.107 | 0.00 | 0.00 |
| ATOM | 416 | O1P  | RG | 14 | 5.424  | 7.196  | -11.067 | 0.00 | 0.00 |
| ATOM | 417 | O2P  | RG | 14 | 5.636  | 6.261  | -8.754  | 0.00 | 0.00 |
| ATOM | 418 | O5'  | RG | 14 | 3.542  | 6.048  | -9.970  | 0.00 | 0.00 |
| ATOM | 419 | C5'  | RG | 14 | 2.702  | 6.140  | -11.086 | 0.00 | 0.00 |
| ATOM | 420 | 1H5' | RG | 14 | 3.050  | 5.498  | -11.873 | 0.00 | 0.00 |
| ATOM | 421 | 2H5' | RG | 14 | 2.710  | 7.148  | -11.456 | 0.00 | 0.00 |
| ATOM | 422 | C4'  | RG | 14 | 1.277  | 5.745  | -10.755 | 0.00 | 0.00 |
| ATOM | 423 | H4'  | RG | 14 | 0.704  | 5.779  | -11.663 | 0.00 | 0.00 |
| ATOM | 424 | O4'  | RG | 14 | 1.203  | 4.434  | -10.231 | 0.00 | 0.00 |
| ATOM | 425 | C1'  | RG | 14 | 0.173  | 4.384  | -9.265  | 0.00 | 0.00 |
| ATOM | 426 | H1'  | RG | 14 | -0.527 | 3.601  | -9.504  | 0.00 | 0.00 |
| ATOM | 427 | N9   | RG | 14 | 0.707  | 4.114  | -7.914  | 0.00 | 0.00 |
| ATOM | 428 | C8   | RG | 14 | 1.905  | 4.463  | -7.364  | 0.00 | 0.00 |
| ATOM | 429 | H8   | RG | 14 | 2.664  | 4.958  | -7.922  | 0.00 | 0.00 |
| ATOM | 430 | N7   | RG | 14 | 2.056  | 4.110  | -6.126  | 0.00 | 0.00 |
| ATOM | 431 | C5   | RG | 14 | 0.840  | 3.503  | -5.810  | 0.00 | 0.00 |
| ATOM | 432 | C6   | RG | 14 | 0.345  | 2.935  | -4.593  | 0.00 | 0.00 |
| ATOM | 433 | O6   | RG | 14 | 0.897  | 2.808  | -3.513  | 0.00 | 0.00 |
| ATOM | 434 | N1   | RG | 14 | -0.951 | 2.497  | -4.688  | 0.00 | 0.00 |
| ATOM | 435 | H1   | RG | 14 | -1.377 | 2.133  | -3.864  | 0.00 | 0.00 |
| ATOM | 436 | C2   | RG | 14 | -1.683 | 2.571  | -5.813  | 0.00 | 0.00 |
| ATOM | 437 | N2   | RG | 14 | -2.887 | 2.127  | -5.748  | 0.00 | 0.00 |
| ATOM | 438 | H21  | RG | 14 | -3.257 | 1.813  | -4.881  | 0.00 | 0.00 |
| ATOM | 439 | H22  | RG | 14 | -3.448 | 2.156  | -6.556  | 0.00 | 0.00 |
| ATOM | 440 | N3   | RG | 14 | -1.269 | 3.063  | -6.967  | 0.00 | 0.00 |
| ATOM | 441 | C4   | RG | 14 | 0.010  | 3.520  | -6.902  | 0.00 | 0.00 |
| ATOM | 442 | C3'  | RG | 14 | 0.586  | 6.652  | -9.764  | 0.00 | 0.00 |
| ATOM | 443 | H3'  | RG | 14 | 1.255  | 6.842  | -8.941  | 0.00 | 0.00 |
| ATOM | 444 | C2'  | RG | 14 | -0.529 | 5.729  | -9.306  | 0.00 | 0.00 |
| ATOM | 445 | 1H2' | RG | 14 | -0.889 | 6.010  | -8.331  | 0.00 | 0.00 |
| ATOM | 446 | O2'  | RG | 14 | -1.586 | 5.629  | -10.229 | 0.00 | 0.00 |
| ATOM | 447 | 2HO' | RG | 14 | -1.906 | 6.088  | -10.329 | 0.00 | 0.00 |
| ATOM | 448 | O3'  | RG | 14 | 0.116  | 7.849  | -10.330 | 0.00 | 0.00 |
| ATOM | 449 | P    | RC | 15 | -0.175 | 9.119  | -9.453  | 0.00 | 0.00 |
| ATOM | 450 | O1P  | RC | 15 | -0.518 | 10.208 | -10.345 | 0.00 | 0.00 |
| ATOM | 451 | O2P  | RC | 15 | 0.944  | 9.297  | -8.559  | 0.00 | 0.00 |
| ATOM | 452 | O5'  | RC | 15 | -1.434 | 8.777  | -8.582  | 0.00 | 0.00 |
| ATOM | 453 | C5'  | RC | 15 | -2.709 | 8.718  | -9.141  | 0.00 | 0.00 |
| ATOM | 454 | 1H5' | RC | 15 | -2.672 | 8.171  | -10.054 | 0.00 | 0.00 |
| ATOM | 455 | 2H5' | RC | 15 | -3.053 | 9.708  | -9.356  | 0.00 | 0.00 |
| ATOM | 456 | C4'  | RC | 15 | -3.712 | 8.039  | -8.223  | 0.00 | 0.00 |
| ATOM | 457 | H4'  | RC | 15 | -4.636 | 7.929  | -8.764  | 0.00 | 0.00 |
| ATOM | 458 | O4'  | RC | 15 | -3.288 | 6.745  | -7.837  | 0.00 | 0.00 |
| ATOM | 459 | C1'  | RC | 15 | -3.752 | 6.471  | -6.524  | 0.00 | 0.00 |
| ATOM | 460 | H1'  | RC | 15 | -4.345 | 5.570  | -6.533  | 0.00 | 0.00 |
| ATOM | 461 | N1   | RC | 15 | -2.650 | 6.307  | -5.539  | 0.00 | 0.00 |
| ATOM | 462 | C6   | RC | 15 | -1.428 | 6.884  | -5.698  | 0.00 | 0.00 |
| ATOM | 463 | H6   | RC | 15 | -1.228 | 7.463  | -6.567  | 0.00 | 0.00 |
| ATOM | 464 | C5   | RC | 15 | -0.475 | 6.733  | -4.766  | 0.00 | 0.00 |
| ATOM | 465 | H5   | RC | 15 | 0.479  | 7.184  | -4.895  | 0.00 | 0.00 |
| ATOM | 466 | C4   | RC | 15 | -0.795 | 5.989  | -3.629  | 0.00 | 0.00 |
| ATOM | 467 | N4   | RC | 15 | 0.071  | 5.817  | -2.692  | 0.00 | 0.00 |
| ATOM | 468 | H41  | RC | 15 | -0.186 | 5.264  | -1.914  | 0.00 | 0.00 |
| ATOM | 469 | H42  | RC | 15 | 0.970  | 6.190  | -2.783  | 0.00 | 0.00 |



|      |     |      |    |    |        |        |        |      |      |
|------|-----|------|----|----|--------|--------|--------|------|------|
| ATOM | 470 | N3   | RC | 15 | -1.960 | 5.438  | -3.443 | 0.00 | 0.00 |
| ATOM | 471 | C2   | RC | 15 | -2.904 | 5.593  | -4.381 | 0.00 | 0.00 |
| ATOM | 472 | O2   | RC | 15 | -3.997 | 5.099  | -4.166 | 0.00 | 0.00 |
| ATOM | 473 | C3'  | RC | 15 | -4.024 | 8.786  | -6.938 | 0.00 | 0.00 |
| ATOM | 474 | H3'  | RC | 15 | -3.102 | 9.107  | -6.487 | 0.00 | 0.00 |
| ATOM | 475 | C2'  | RC | 15 | -4.638 | 7.643  | -6.141 | 0.00 | 0.00 |
| ATOM | 476 | 1H2' | RC | 15 | -4.606 | 7.848  | -5.085 | 0.00 | 0.00 |
| ATOM | 477 | O2'  | RC | 15 | -5.947 | 7.327  | -6.554 | 0.00 | 0.00 |
| ATOM | 478 | 2HO' | RC | 15 | -6.355 | 7.637  | -6.491 | 0.00 | 0.00 |
| ATOM | 479 | O3'  | RC | 15 | -4.903 | 9.869  | -7.098 | 0.00 | 0.00 |
| ATOM | 480 | P    | RA | 16 | -4.979 | 11.029 | -6.036 | 0.00 | 0.00 |
| ATOM | 481 | O1P  | RA | 16 | -6.008 | 11.962 | -6.476 | 0.00 | 0.00 |
| ATOM | 482 | O2P  | RA | 16 | -3.628 | 11.532 | -5.808 | 0.00 | 0.00 |
| ATOM | 483 | O5'  | RA | 16 | -5.463 | 10.383 | -4.679 | 0.00 | 0.00 |
| ATOM | 484 | C5'  | RA | 16 | -6.779 | 9.925  | -4.489 | 0.00 | 0.00 |
| ATOM | 485 | 1H5' | RA | 16 | -7.062 | 9.258  | -5.279 | 0.00 | 0.00 |
| ATOM | 486 | 2H5' | RA | 16 | -7.460 | 10.755 | -4.492 | 0.00 | 0.00 |
| ATOM | 487 | C4'  | RA | 16 | -6.920 | 9.185  | -3.168 | 0.00 | 0.00 |
| ATOM | 488 | H4'  | RA | 16 | -7.928 | 8.820  | -3.084 | 0.00 | 0.00 |
| ATOM | 489 | O4'  | RA | 16 | -6.047 | 8.080  | -3.062 | 0.00 | 0.00 |
| ATOM | 490 | C1'  | RA | 16 | -5.563 | 7.998  | -1.732 | 0.00 | 0.00 |
| ATOM | 491 | H1'  | RA | 16 | -5.739 | 7.014  | -1.336 | 0.00 | 0.00 |
| ATOM | 492 | N9   | RA | 16 | -4.119 | 8.279  | -1.673 | 0.00 | 0.00 |
| ATOM | 493 | C8   | RA | 16 | -3.316 | 8.883  | -2.593 | 0.00 | 0.00 |
| ATOM | 494 | H8   | RA | 16 | -3.687 | 9.273  | -3.514 | 0.00 | 0.00 |
| ATOM | 495 | N7   | RA | 16 | -2.070 | 8.951  | -2.258 | 0.00 | 0.00 |
| ATOM | 496 | C5   | RA | 16 | -2.047 | 8.339  | -1.013 | 0.00 | 0.00 |
| ATOM | 497 | C6   | RA | 16 | -1.052 | 8.051  | -0.064 | 0.00 | 0.00 |
| ATOM | 498 | N6   | RA | 16 | 0.216  | 8.315  | -0.196 | 0.00 | 0.00 |
| ATOM | 499 | H61  | RA | 16 | 0.808  | 8.074  | 0.549  | 0.00 | 0.00 |
| ATOM | 500 | H62  | RA | 16 | 0.516  | 8.791  | -1.004 | 0.00 | 0.00 |
| ATOM | 501 | N1   | RA | 16 | -1.354 | 7.479  | 1.087  | 0.00 | 0.00 |
| ATOM | 502 | C2   | RA | 16 | -2.609 | 7.181  | 1.316  | 0.00 | 0.00 |
| ATOM | 503 | H2   | RA | 16 | -2.822 | 6.716  | 2.249  | 0.00 | 0.00 |
| ATOM | 504 | N3   | RA | 16 | -3.648 | 7.375  | 0.530  | 0.00 | 0.00 |
| ATOM | 505 | C4   | RA | 16 | -3.296 | 7.963  | -0.637 | 0.00 | 0.00 |
| ATOM | 506 | C3'  | RA | 16 | -6.669 | 10.055 | -1.958 | 0.00 | 0.00 |
| ATOM | 507 | H3'  | RA | 16 | -5.792 | 10.639 | -2.136 | 0.00 | 0.00 |
| ATOM | 508 | C2'  | RA | 16 | -6.348 | 9.001  | -0.914 | 0.00 | 0.00 |
| ATOM | 509 | 1H2' | RA | 16 | -5.749 | 9.414  | -0.122 | 0.00 | 0.00 |
| ATOM | 510 | O2'  | RA | 16 | -7.494 | 8.377  | -0.393 | 0.00 | 0.00 |
| ATOM | 511 | 2HO' | RA | 16 | -7.832 | 8.651  | -0.117 | 0.00 | 0.00 |
| ATOM | 512 | O3'  | RA | 16 | -7.771 | 10.833 | -1.610 | 0.00 | 0.00 |
| ATOM | 513 | P    | RC | 17 | -7.592 | 12.240 | -0.990 | 0.00 | 0.00 |
| ATOM | 514 | O1P  | RC | 17 | -8.912 | 12.789 | -0.814 | 0.00 | 0.00 |
| ATOM | 515 | O2P  | RC | 17 | -6.635 | 12.956 | -1.804 | 0.00 | 0.00 |
| ATOM | 516 | O5'  | RC | 17 | -6.947 | 11.994 | 0.422  | 0.00 | 0.00 |
| ATOM | 517 | C5'  | RC | 17 | -7.665 | 11.454 | 1.492  | 0.00 | 0.00 |
| ATOM | 518 | 1H5' | RC | 17 | -8.206 | 10.594 | 1.164  | 0.00 | 0.00 |
| ATOM | 519 | 2H5' | RC | 17 | -8.373 | 12.172 | 1.835  | 0.00 | 0.00 |
| ATOM | 520 | C4'  | RC | 17 | -6.751 | 11.051 | 2.642  | 0.00 | 0.00 |
| ATOM | 521 | H4'  | RC | 17 | -7.356 | 10.599 | 3.404  | 0.00 | 0.00 |
| ATOM | 522 | O4'  | RC | 17 | -5.783 | 10.105 | 2.233  | 0.00 | 0.00 |
| ATOM | 523 | C1'  | RC | 17 | -4.593 | 10.311 | 2.967  | 0.00 | 0.00 |
| ATOM | 524 | H1'  | RC | 17 | -4.338 | 9.405  | 3.486  | 0.00 | 0.00 |
| ATOM | 525 | N1   | RC | 17 | -3.442 | 10.684 | 2.103  | 0.00 | 0.00 |
| ATOM | 526 | C6   | RC | 17 | -3.605 | 11.273 | 0.890  | 0.00 | 0.00 |
| ATOM | 527 | H6   | RC | 17 | -4.587 | 11.419 | 0.505  | 0.00 | 0.00 |
| ATOM | 528 | C5   | RC | 17 | -2.538 | 11.672 | 0.178  | 0.00 | 0.00 |
| ATOM | 529 | H5   | RC | 17 | -2.672 | 12.137 | -0.769 | 0.00 | 0.00 |
| ATOM | 530 | C4   | RC | 17 | -1.273 | 11.471 | 0.736  | 0.00 | 0.00 |
| ATOM | 531 | N4   | RC | 17 | -0.223 | 11.853 | 0.102  | 0.00 | 0.00 |
| ATOM | 532 | H41  | RC | 17 | 0.656  | 11.701 | 0.523  | 0.00 | 0.00 |
| ATOM | 533 | H42  | RC | 17 | -0.314 | 12.291 | -0.776 | 0.00 | 0.00 |
| ATOM | 534 | N3   | RC | 17 | -1.082 | 10.902 | 1.892  | 0.00 | 0.00 |
| ATOM | 535 | C2   | RC | 17 | -2.156 | 10.491 | 2.594  | 0.00 | 0.00 |
| ATOM | 536 | O2   | RC | 17 | -1.961 | 9.962  | 3.672  | 0.00 | 0.00 |
| ATOM | 537 | C3'  | RC | 17 | -5.976 | 12.182 | 3.286  | 0.00 | 0.00 |

|      |     |      |    |    |        |        |        |      |      |
|------|-----|------|----|----|--------|--------|--------|------|------|
| ATOM | 538 | H3'  | RC | 17 | -5.565 | 12.785 | 2.503  | 0.00 | 0.00 |
| ATOM | 539 | C2'  | RC | 17 | -4.875 | 11.408 | 3.979  | 0.00 | 0.00 |
| ATOM | 540 | 1H2' | RC | 17 | -4.010 | 12.021 | 4.128  | 0.00 | 0.00 |
| ATOM | 541 | O2'  | RC | 17 | -5.267 | 10.815 | 5.180  | 0.00 | 0.00 |
| ATOM | 542 | 2HO' | RC | 17 | -5.091 | 10.775 | 5.581  | 0.00 | 0.00 |
| ATOM | 543 | O3'  | RC | 17 | -6.728 | 12.981 | 4.163  | 0.00 | 0.00 |
| ATOM | 544 | P    | RG | 18 | -6.197 | 14.374 | 4.674  | 0.00 | 0.00 |
| ATOM | 545 | O1P  | RG | 18 | -7.311 | 15.063 | 5.310  | 0.00 | 0.00 |
| ATOM | 546 | O2P  | RG | 18 | -5.509 | 15.035 | 3.579  | 0.00 | 0.00 |
| ATOM | 547 | O5'  | RG | 18 | -5.113 | 14.096 | 5.780  | 0.00 | 0.00 |
| ATOM | 548 | C5'  | RG | 18 | -5.454 | 13.649 | 7.067  | 0.00 | 0.00 |
| ATOM | 549 | 1H5' | RG | 18 | -5.943 | 12.700 | 6.987  | 0.00 | 0.00 |
| ATOM | 550 | 2H5' | RG | 18 | -6.126 | 14.346 | 7.523  | 0.00 | 0.00 |
| ATOM | 551 | C4'  | RG | 18 | -4.234 | 13.506 | 7.971  | 0.00 | 0.00 |
| ATOM | 552 | H4'  | RG | 18 | -4.577 | 13.201 | 8.945  | 0.00 | 0.00 |
| ATOM | 553 | O4'  | RG | 18 | -3.319 | 12.537 | 7.496  | 0.00 | 0.00 |
| ATOM | 554 | C1'  | RG | 18 | -1.999 | 12.990 | 7.707  | 0.00 | 0.00 |
| ATOM | 555 | H1'  | RG | 18 | -1.406 | 12.241 | 8.200  | 0.00 | 0.00 |
| ATOM | 556 | N9   | RG | 18 | -1.343 | 13.327 | 6.434  | 0.00 | 0.00 |
| ATOM | 557 | C8   | RG | 18 | -1.907 | 13.466 | 5.201  | 0.00 | 0.00 |
| ATOM | 558 | H8   | RG | 18 | -2.956 | 13.367 | 5.041  | 0.00 | 0.00 |
| ATOM | 559 | N7   | RG | 18 | -1.087 | 13.755 | 4.246  | 0.00 | 0.00 |
| ATOM | 560 | C5   | RG | 18 | 0.130  | 13.844 | 4.901  | 0.00 | 0.00 |
| ATOM | 561 | C6   | RG | 18 | 1.427  | 14.170 | 4.415  | 0.00 | 0.00 |
| ATOM | 562 | O6   | RG | 18 | 1.776  | 14.410 | 3.279  | 0.00 | 0.00 |
| ATOM | 563 | N1   | RG | 18 | 2.384  | 14.226 | 5.395  | 0.00 | 0.00 |
| ATOM | 564 | H1   | RG | 18 | 3.292  | 14.528 | 5.137  | 0.00 | 0.00 |
| ATOM | 565 | C2   | RG | 18 | 2.142  | 13.933 | 6.677  | 0.00 | 0.00 |
| ATOM | 566 | N2   | RG | 18 | 3.126  | 14.004 | 7.506  | 0.00 | 0.00 |
| ATOM | 567 | H21  | RG | 18 | 4.031  | 14.251 | 7.204  | 0.00 | 0.00 |
| ATOM | 568 | H22  | RG | 18 | 2.954  | 13.771 | 8.446  | 0.00 | 0.00 |
| ATOM | 569 | N3   | RG | 18 | 0.964  | 13.606 | 7.170  | 0.00 | 0.00 |
| ATOM | 570 | C4   | RG | 18 | -0.016 | 13.584 | 6.236  | 0.00 | 0.00 |
| ATOM | 571 | C3'  | RG | 18 | -3.443 | 14.788 | 8.134  | 0.00 | 0.00 |
| ATOM | 572 | H3'  | RG | 18 | -3.305 | 15.239 | 7.166  | 0.00 | 0.00 |
| ATOM | 573 | C2'  | RG | 18 | -2.112 | 14.217 | 8.598  | 0.00 | 0.00 |
| ATOM | 574 | 1H2' | RG | 18 | -1.302 | 14.906 | 8.438  | 0.00 | 0.00 |
| ATOM | 575 | O2'  | RG | 18 | -2.125 | 13.808 | 9.945  | 0.00 | 0.00 |
| ATOM | 576 | 2HO' | RG | 18 | -2.468 | 14.068 | 10.341 | 0.00 | 0.00 |
| ATOM | 577 | O3'  | RG | 18 | -4.003 | 15.700 | 9.049  | 0.00 | 0.00 |
| ATOM | 578 | P    | RG | 19 | -3.781 | 17.247 | 8.879  | 0.00 | 0.00 |
| ATOM | 579 | O1P  | RG | 19 | -4.452 | 17.912 | 9.992  | 0.00 | 0.00 |
| ATOM | 580 | O2P  | RG | 19 | -4.176 | 17.597 | 7.521  | 0.00 | 0.00 |
| ATOM | 581 | O5'  | RG | 19 | -2.229 | 17.481 | 9.018  | 0.00 | 0.00 |
| ATOM | 582 | C5'  | RG | 19 | -1.576 | 17.384 | 10.260 | 0.00 | 0.00 |
| ATOM | 583 | 1H5' | RG | 19 | -1.745 | 16.418 | 10.683 | 0.00 | 0.00 |
| ATOM | 584 | 2H5' | RG | 19 | -1.967 | 18.111 | 10.938 | 0.00 | 0.00 |
| ATOM | 585 | C4'  | RG | 19 | -0.087 | 17.607 | 10.129 | 0.00 | 0.00 |
| ATOM | 586 | H4'  | RG | 19 | 0.344  | 17.517 | 11.113 | 0.00 | 0.00 |
| ATOM | 587 | O4'  | RG | 19 | 0.530  | 16.659 | 9.295  | 0.00 | 0.00 |
| ATOM | 588 | C1'  | RG | 19 | 1.543  | 17.315 | 8.549  | 0.00 | 0.00 |
| ATOM | 589 | H1'  | RG | 19 | 2.480  | 16.799 | 8.636  | 0.00 | 0.00 |
| ATOM | 590 | N9   | RG | 19 | 1.172  | 17.355 | 7.122  | 0.00 | 0.00 |
| ATOM | 591 | C8   | RG | 19 | -0.002 | 17.016 | 6.525  | 0.00 | 0.00 |
| ATOM | 592 | H8   | RG | 19 | -0.849 | 16.698 | 7.084  | 0.00 | 0.00 |
| ATOM | 593 | N7   | RG | 19 | -0.006 | 17.103 | 5.236  | 0.00 | 0.00 |
| ATOM | 594 | C5   | RG | 19 | 1.272  | 17.560 | 4.942  | 0.00 | 0.00 |
| ATOM | 595 | C6   | RG | 19 | 1.907  | 17.857 | 3.699  | 0.00 | 0.00 |
| ATOM | 596 | O6   | RG | 19 | 1.483  | 17.711 | 2.566  | 0.00 | 0.00 |
| ATOM | 597 | N1   | RG | 19 | 3.159  | 18.383 | 3.848  | 0.00 | 0.00 |
| ATOM | 598 | H1   | RG | 19 | 3.644  | 18.635 | 3.019  | 0.00 | 0.00 |
| ATOM | 599 | C2   | RG | 19 | 3.773  | 18.536 | 5.027  | 0.00 | 0.00 |
| ATOM | 600 | N2   | RG | 19 | 4.948  | 19.071 | 5.003  | 0.00 | 0.00 |
| ATOM | 601 | H21  | RG | 19 | 5.353  | 19.363 | 4.143  | 0.00 | 0.00 |
| ATOM | 602 | H22  | RG | 19 | 5.390  | 19.242 | 5.870  | 0.00 | 0.00 |
| ATOM | 603 | N3   | RG | 19 | 3.254  | 18.219 | 6.202  | 0.00 | 0.00 |
| ATOM | 604 | C4   | RG | 19 | 1.986  | 17.742 | 6.096  | 0.00 | 0.00 |
| ATOM | 605 | C3'  | RG | 19 | 0.270  | 18.974 | 9.598  | 0.00 | 0.00 |

|      |     |      |    |    |        |        |        |      |      |
|------|-----|------|----|----|--------|--------|--------|------|------|
| ATOM | 606 | H3'  | RG | 19 | -0.351 | 19.205 | 8.755  | 0.00 | 0.00 |
| ATOM | 607 | C2'  | RG | 19 | 1.682  | 18.718 | 9.110  | 0.00 | 0.00 |
| ATOM | 608 | 1H2' | RG | 19 | 1.976  | 19.423 | 8.353  | 0.00 | 0.00 |
| ATOM | 609 | O2'  | RG | 19 | 2.624  | 18.698 | 10.161 | 0.00 | 0.00 |
| ATOM | 610 | 2HO' | RG | 19 | 2.544  | 19.201 | 10.673 | 0.00 | 0.00 |
| ATOM | 611 | O3'  | RG | 19 | 0.229  | 19.975 | 10.573 | 0.00 | 0.00 |
| ATOM | 612 | P    | RC | 20 | -0.158 | 21.436 | 10.215 | 0.00 | 0.00 |
| ATOM | 613 | O1P  | RC | 20 | -0.029 | 22.229 | 11.415 | 0.00 | 0.00 |
| ATOM | 614 | O2P  | RC | 20 | -1.436 | 21.385 | 9.549  | 0.00 | 0.00 |
| ATOM | 615 | O5'  | RC | 20 | 0.914  | 21.927 | 9.194  | 0.00 | 0.00 |
| ATOM | 616 | C5'  | RC | 20 | 2.201  | 22.282 | 9.603  | 0.00 | 0.00 |
| ATOM | 617 | 1H5' | RC | 20 | 2.657  | 21.445 | 10.083 | 0.00 | 0.00 |
| ATOM | 618 | 2H5' | RC | 20 | 2.151  | 23.086 | 10.306 | 0.00 | 0.00 |
| ATOM | 619 | C4'  | RC | 20 | 3.062  | 22.726 | 8.447  | 0.00 | 0.00 |
| ATOM | 620 | H4'  | RC | 20 | 4.021  | 23.009 | 8.834  | 0.00 | 0.00 |
| ATOM | 621 | O4'  | RC | 20 | 3.242  | 21.701 | 7.503  | 0.00 | 0.00 |
| ATOM | 622 | C1'  | RC | 20 | 3.394  | 22.268 | 6.220  | 0.00 | 0.00 |
| ATOM | 623 | H1'  | RC | 20 | 4.373  | 22.055 | 5.845  | 0.00 | 0.00 |
| ATOM | 624 | N1   | RC | 20 | 2.396  | 21.767 | 5.243  | 0.00 | 0.00 |
| ATOM | 625 | C6   | RC | 20 | 1.170  | 21.322 | 5.615  | 0.00 | 0.00 |
| ATOM | 626 | H6   | RC | 20 | 0.914  | 21.280 | 6.648  | 0.00 | 0.00 |
| ATOM | 627 | C5   | RC | 20 | 0.284  | 20.920 | 4.688  | 0.00 | 0.00 |
| ATOM | 628 | H5   | RC | 20 | -0.676 | 20.571 | 4.983  | 0.00 | 0.00 |
| ATOM | 629 | C4   | RC | 20 | 0.668  | 20.995 | 3.341  | 0.00 | 0.00 |
| ATOM | 630 | N4   | RC | 20 | -0.142 | 20.631 | 2.418  | 0.00 | 0.00 |
| ATOM | 631 | H41  | RC | 20 | 0.184  | 20.702 | 1.493  | 0.00 | 0.00 |
| ATOM | 632 | H42  | RC | 20 | -1.047 | 20.337 | 2.661  | 0.00 | 0.00 |
| ATOM | 633 | N3   | RC | 20 | 1.836  | 21.418 | 2.959  | 0.00 | 0.00 |
| ATOM | 634 | C2   | RC | 20 | 2.718  | 21.815 | 3.892  | 0.00 | 0.00 |
| ATOM | 635 | O2   | RC | 20 | 3.793  | 22.211 | 3.506  | 0.00 | 0.00 |
| ATOM | 636 | C3'  | RC | 20 | 2.483  | 23.892 | 7.689  | 0.00 | 0.00 |
| ATOM | 637 | H3'  | RC | 20 | 1.443  | 23.712 | 7.511  | 0.00 | 0.00 |
| ATOM | 638 | C2'  | RC | 20 | 3.249  | 23.761 | 6.391  | 0.00 | 0.00 |
| ATOM | 639 | 1H2' | RC | 20 | 2.699  | 24.193 | 5.581  | 0.00 | 0.00 |
| ATOM | 640 | O2'  | RC | 20 | 4.515  | 24.325 | 6.481  | 0.00 | 0.00 |
| ATOM | 641 | 2HO' | RC | 20 | 4.446  | 25.117 | 6.673  | 0.00 | 0.00 |
| ATOM | 642 | O3'  | RC | 20 | 2.668  | 25.125 | 8.327  | 0.00 | 0.00 |
| ATOM | 643 | P    | RA | 21 | 1.937  | 26.409 | 7.839  | 0.00 | 0.00 |
| ATOM | 644 | O1P  | RA | 21 | 2.336  | 27.479 | 8.730  | 0.00 | 0.00 |
| ATOM | 645 | O2P  | RA | 21 | 0.532  | 26.109 | 7.685  | 0.00 | 0.00 |
| ATOM | 646 | O5'  | RA | 21 | 2.574  | 26.697 | 6.429  | 0.00 | 0.00 |
| ATOM | 647 | C5'  | RA | 21 | 1.826  | 27.117 | 5.347  | 0.00 | 0.00 |
| ATOM | 648 | 1H5' | RA | 21 | 1.485  | 28.091 | 5.525  | 0.00 | 0.00 |
| ATOM | 649 | 2H5' | RA | 21 | 0.993  | 26.491 | 5.215  | 0.00 | 0.00 |
| ATOM | 650 | C4'  | RA | 21 | 2.656  | 27.112 | 4.095  | 0.00 | 0.00 |
| ATOM | 651 | H4'  | RA | 21 | 3.598  | 27.551 | 4.327  | 0.00 | 0.00 |
| ATOM | 652 | O4'  | RA | 21 | 2.853  | 25.818 | 3.605  | 0.00 | 0.00 |
| ATOM | 653 | C1'  | RA | 21 | 2.803  | 25.827 | 2.190  | 0.00 | 0.00 |
| ATOM | 654 | H1'  | RA | 21 | 3.683  | 25.375 | 1.791  | 0.00 | 0.00 |
| ATOM | 655 | N9   | RA | 21 | 1.640  | 25.071 | 1.710  | 0.00 | 0.00 |
| ATOM | 656 | C8   | RA | 21 | 0.586  | 24.599 | 2.419  | 0.00 | 0.00 |
| ATOM | 657 | H8   | RA | 21 | 0.476  | 24.772 | 3.464  | 0.00 | 0.00 |
| ATOM | 658 | N7   | RA | 21 | -0.277 | 23.934 | 1.725  | 0.00 | 0.00 |
| ATOM | 659 | C5   | RA | 21 | 0.264  | 23.948 | 0.446  | 0.00 | 0.00 |
| ATOM | 660 | C6   | RA | 21 | -0.095 | 23.405 | -0.800 | 0.00 | 0.00 |
| ATOM | 661 | N6   | RA | 21 | -1.141 | 22.661 | -1.011 | 0.00 | 0.00 |
| ATOM | 662 | H61  | RA | 21 | -1.289 | 22.310 | -1.922 | 0.00 | 0.00 |
| ATOM | 663 | H62  | RA | 21 | -1.753 | 22.474 | -0.263 | 0.00 | 0.00 |
| ATOM | 664 | N1   | RA | 21 | 0.641  | 23.594 | -1.871 | 0.00 | 0.00 |
| ATOM | 665 | C2   | RA | 21 | 1.721  | 24.314 | -1.736 | 0.00 | 0.00 |
| ATOM | 666 | H2   | RA | 21 | 2.290  | 24.452 | -2.622 | 0.00 | 0.00 |
| ATOM | 667 | N3   | RA | 21 | 2.200  | 24.879 | -0.648 | 0.00 | 0.00 |
| ATOM | 668 | C4   | RA | 21 | 1.419  | 24.654 | 0.425  | 0.00 | 0.00 |
| ATOM | 669 | C3'  | RA | 21 | 2.016  | 27.876 | 2.964  | 0.00 | 0.00 |
| ATOM | 670 | H3'  | RA | 21 | 0.988  | 27.611 | 2.916  | 0.00 | 0.00 |
| ATOM | 671 | C2'  | RA | 21 | 2.726  | 27.271 | 1.784  | 0.00 | 0.00 |
| ATOM | 672 | 1H2' | RA | 21 | 2.170  | 27.390 | 0.872  | 0.00 | 0.00 |
| ATOM | 673 | O2'  | RA | 21 | 4.021  | 27.743 | 1.639  | 0.00 | 0.00 |

|      |     |      |     |    |        |        |        |      |      |
|------|-----|------|-----|----|--------|--------|--------|------|------|
| ATOM | 674 | 2HO' | RA  | 21 | 4.170  | 28.015 | 1.238  | 0.00 | 0.00 |
| ATOM | 675 | O3'  | RA  | 21 | 2.191  | 29.241 | 3.095  | 0.00 | 0.00 |
| ATOM | 676 | P    | RA  | 22 | 1.174  | 30.236 | 2.480  | 0.00 | 0.00 |
| ATOM | 677 | O1P  | RA  | 22 | 1.600  | 31.551 | 2.839  | 0.00 | 0.00 |
| ATOM | 678 | O2P  | RA  | 22 | -0.132 | 29.817 | 2.853  | 0.00 | 0.00 |
| ATOM | 679 | O5'  | RA  | 22 | 1.295  | 30.067 | 0.944  | 0.00 | 0.00 |
| ATOM | 680 | C5'  | RA  | 22 | 2.381  | 30.511 | 0.250  | 0.00 | 0.00 |
| ATOM | 681 | 1H5' | RA  | 22 | 3.261  | 30.117 | 0.674  | 0.00 | 0.00 |
| ATOM | 682 | 2H5' | RA  | 22 | 2.442  | 31.561 | 0.331  | 0.00 | 0.00 |
| ATOM | 683 | C4'  | RA  | 22 | 2.301  | 30.116 | -1.199 | 0.00 | 0.00 |
| ATOM | 684 | H4'  | RA  | 22 | 3.150  | 30.486 | -1.682 | 0.00 | 0.00 |
| ATOM | 685 | O4'  | RA  | 22 | 2.270  | 28.740 | -1.379 | 0.00 | 0.00 |
| ATOM | 686 | C1'  | RA  | 22 | 1.468  | 28.447 | -2.499 | 0.00 | 0.00 |
| ATOM | 687 | H1'  | RA  | 22 | 2.017  | 27.916 | -3.209 | 0.00 | 0.00 |
| ATOM | 688 | N9   | RA  | 22 | 0.329  | 27.661 | -2.140 | 0.00 | 0.00 |
| ATOM | 689 | C8   | RA  | 22 | -0.280 | 27.548 | -0.953 | 0.00 | 0.00 |
| ATOM | 690 | H8   | RA  | 22 | 0.018  | 28.082 | -0.091 | 0.00 | 0.00 |
| ATOM | 691 | N7   | RA  | 22 | -1.254 | 26.731 | -0.961 | 0.00 | 0.00 |
| ATOM | 692 | C5   | RA  | 22 | -1.300 | 26.289 | -2.265 | 0.00 | 0.00 |
| ATOM | 693 | C6   | RA  | 22 | -2.088 | 25.403 | -2.995 | 0.00 | 0.00 |
| ATOM | 694 | N6   | RA  | 22 | -3.056 | 24.706 | -2.527 | 0.00 | 0.00 |
| ATOM | 695 | H61  | RA  | 22 | -3.514 | 24.090 | -3.135 | 0.00 | 0.00 |
| ATOM | 696 | H62  | RA  | 22 | -3.273 | 24.763 | -1.585 | 0.00 | 0.00 |
| ATOM | 697 | N1   | RA  | 22 | -1.903 | 25.206 | -4.279 | 0.00 | 0.00 |
| ATOM | 698 | C2   | RA  | 22 | -0.942 | 25.853 | -4.839 | 0.00 | 0.00 |
| ATOM | 699 | H2   | RA  | 22 | -0.814 | 25.681 | -5.868 | 0.00 | 0.00 |
| ATOM | 700 | N3   | RA  | 22 | -0.123 | 26.699 | -4.292 | 0.00 | 0.00 |
| ATOM | 701 | C4   | RA  | 22 | -0.351 | 26.865 | -2.989 | 0.00 | 0.00 |
| ATOM | 702 | C3'  | RA  | 22 | 1.104  | 30.643 | -1.914 | 0.00 | 0.00 |
| ATOM | 703 | H3'  | RA  | 22 | 0.275  | 30.475 | -1.316 | 0.00 | 0.00 |
| ATOM | 704 | C2'  | RA  | 22 | 1.051  | 29.727 | -3.095 | 0.00 | 0.00 |
| ATOM | 705 | 1H2' | RA  | 22 | 0.089  | 29.658 | -3.514 | 0.00 | 0.00 |
| ATOM | 706 | O2'  | RA  | 22 | 1.937  | 30.059 | -4.061 | 0.00 | 0.00 |
| ATOM | 707 | 2HO' | RA  | 22 | 1.944  | 30.474 | -4.266 | 0.00 | 0.00 |
| ATOM | 708 | O3'  | RA  | 22 | 1.218  | 31.950 | -2.256 | 0.00 | 0.00 |
| ATOM | 709 | P    | RG3 | 23 | -0.014 | 32.829 | -2.424 | 0.00 | 0.00 |
| ATOM | 710 | O1P  | RG3 | 23 | 0.429  | 34.132 | -2.665 | 0.00 | 0.00 |
| ATOM | 711 | O2P  | RG3 | 23 | -0.850 | 32.579 | -1.328 | 0.00 | 0.00 |
| ATOM | 712 | O5'  | RG3 | 23 | -0.758 | 32.334 | -3.698 | 0.00 | 0.00 |
| ATOM | 713 | C5'  | RG3 | 23 | -0.324 | 32.591 | -4.950 | 0.00 | 0.00 |
| ATOM | 714 | 1H5' | RG3 | 23 | 0.659  | 32.255 | -5.011 | 0.00 | 0.00 |
| ATOM | 715 | 2H5' | RG3 | 23 | -0.338 | 33.605 | -5.122 | 0.00 | 0.00 |
| ATOM | 716 | C4'  | RG3 | 23 | -1.160 | 31.949 | -6.017 | 0.00 | 0.00 |
| ATOM | 717 | H4'  | RG3 | 23 | -0.758 | 32.179 | -6.937 | 0.00 | 0.00 |
| ATOM | 718 | O4'  | RG3 | 23 | -1.181 | 30.620 | -5.883 | 0.00 | 0.00 |
| ATOM | 719 | C1'  | RG3 | 23 | -2.414 | 30.197 | -6.240 | 0.00 | 0.00 |
| ATOM | 720 | H1'  | RG3 | 23 | -2.390 | 29.677 | -7.108 | 0.00 | 0.00 |
| ATOM | 721 | N9   | RG3 | 23 | -2.972 | 29.356 | -5.241 | 0.00 | 0.00 |
| ATOM | 722 | C8   | RG3 | 23 | -2.900 | 29.478 | -3.918 | 0.00 | 0.00 |
| ATOM | 723 | H8   | RG3 | 23 | -2.322 | 30.204 | -3.418 | 0.00 | 0.00 |
| ATOM | 724 | N7   | RG3 | 23 | -3.605 | 28.637 | -3.300 | 0.00 | 0.00 |
| ATOM | 725 | C5   | RG3 | 23 | -4.200 | 27.911 | -4.306 | 0.00 | 0.00 |
| ATOM | 726 | C6   | RG3 | 23 | -5.130 | 26.864 | -4.286 | 0.00 | 0.00 |
| ATOM | 727 | O6   | RG3 | 23 | -5.624 | 26.336 | -3.351 | 0.00 | 0.00 |
| ATOM | 728 | N1   | RG3 | 23 | -5.506 | 26.419 | -5.507 | 0.00 | 0.00 |
| ATOM | 729 | H1   | RG3 | 23 | -6.165 | 25.698 | -5.557 | 0.00 | 0.00 |
| ATOM | 730 | C2   | RG3 | 23 | -5.065 | 26.917 | -6.623 | 0.00 | 0.00 |
| ATOM | 731 | N2   | RG3 | 23 | -5.530 | 26.414 | -7.700 | 0.00 | 0.00 |
| ATOM | 732 | H21  | RG3 | 23 | -6.213 | 25.727 | -7.677 | 0.00 | 0.00 |
| ATOM | 733 | H22  | RG3 | 23 | -5.215 | 26.777 | -8.529 | 0.00 | 0.00 |
| ATOM | 734 | N3   | RG3 | 23 | -4.203 | 27.874 | -6.694 | 0.00 | 0.00 |
| ATOM | 735 | C4   | RG3 | 23 | -3.803 | 28.337 | -5.500 | 0.00 | 0.00 |
| ATOM | 736 | C3'  | RG3 | 23 | -2.553 | 32.392 | -6.058 | 0.00 | 0.00 |
| ATOM | 737 | H3'  | RG3 | 23 | -2.797 | 32.587 | -5.238 | 0.00 | 0.00 |
| ATOM | 738 | C2'  | RG3 | 23 | -3.194 | 31.373 | -6.473 | 0.00 | 0.00 |
| ATOM | 739 | 1H2' | RG3 | 23 | -3.889 | 31.291 | -6.066 | 0.00 | 0.00 |
| ATOM | 740 | O2'  | RG3 | 23 | -3.442 | 31.580 | -7.555 | 0.00 | 0.00 |
| ATOM | 741 | 2HO' | RG3 | 23 | -3.862 | 31.551 | -7.694 | 0.00 | 0.00 |

|      |     |      |     |    |        |         |         |      |      |
|------|-----|------|-----|----|--------|---------|---------|------|------|
| ATOM | 742 | O3'  | RG3 | 23 | -2.878 | 33.300  | -6.797  | 0.00 | 0.00 |
| ATOM | 743 | H3T  | RG3 | 23 | -3.327 | 33.425  | -6.913  | 0.00 | 0.00 |
| ATOM | 744 | H5T  | RC5 | 24 | 5.947  | -21.452 | -6.840  | 0.00 | 0.00 |
| ATOM | 745 | O5'  | RC5 | 24 | 5.634  | -21.871 | -7.146  | 0.00 | 0.00 |
| ATOM | 746 | C5'  | RC5 | 24 | 5.797  | -22.001 | -8.506  | 0.00 | 0.00 |
| ATOM | 747 | 1H5' | RC5 | 24 | 6.494  | -22.759 | -8.696  | 0.00 | 0.00 |
| ATOM | 748 | 2H5' | RC5 | 24 | 6.172  | -21.102 | -8.898  | 0.00 | 0.00 |
| ATOM | 749 | C4'  | RC5 | 24 | 4.540  | -22.334 | -9.233  | 0.00 | 0.00 |
| ATOM | 750 | H4'  | RC5 | 24 | 4.749  | -22.332 | -10.273 | 0.00 | 0.00 |
| ATOM | 751 | O4'  | RC5 | 24 | 4.073  | -23.598 | -8.895  | 0.00 | 0.00 |
| ATOM | 752 | C1'  | RC5 | 24 | 2.663  | -23.616 | -8.992  | 0.00 | 0.00 |
| ATOM | 753 | H1'  | RC5 | 24 | 2.374  | -24.340 | -9.730  | 0.00 | 0.00 |
| ATOM | 754 | N1   | RC5 | 24 | 2.021  | -23.972 | -7.701  | 0.00 | 0.00 |
| ATOM | 755 | C6   | RC5 | 24 | 2.645  | -23.832 | -6.523  | 0.00 | 0.00 |
| ATOM | 756 | H6   | RC5 | 24 | 3.619  | -23.438 | -6.502  | 0.00 | 0.00 |
| ATOM | 757 | C5   | RC5 | 24 | 2.046  | -24.204 | -5.386  | 0.00 | 0.00 |
| ATOM | 758 | H5   | RC5 | 24 | 2.543  | -24.101 | -4.467  | 0.00 | 0.00 |
| ATOM | 759 | C4   | RC5 | 24 | 0.771  | -24.747 | -5.467  | 0.00 | 0.00 |
| ATOM | 760 | N4   | RC5 | 24 | 0.166  | -25.147 | -4.415  | 0.00 | 0.00 |
| ATOM | 761 | H41  | RC5 | 24 | 0.597  | -25.067 | -3.550  | 0.00 | 0.00 |
| ATOM | 762 | H42  | RC5 | 24 | -0.737 | -25.491 | -4.508  | 0.00 | 0.00 |
| ATOM | 763 | N3   | RC5 | 24 | 0.138  | -24.871 | -6.583  | 0.00 | 0.00 |
| ATOM | 764 | C2   | RC5 | 24 | 0.741  | -24.467 | -7.708  | 0.00 | 0.00 |
| ATOM | 765 | O2   | RC5 | 24 | 0.123  | -24.566 | -8.734  | 0.00 | 0.00 |
| ATOM | 766 | C3'  | RC5 | 24 | 3.393  | -21.384 | -9.019  | 0.00 | 0.00 |
| ATOM | 767 | H3'  | RC5 | 24 | 3.282  | -21.201 | -7.974  | 0.00 | 0.00 |
| ATOM | 768 | C2'  | RC5 | 24 | 2.257  | -22.249 | -9.475  | 0.00 | 0.00 |
| ATOM | 769 | 1H2' | RC5 | 24 | 1.349  | -21.935 | -9.029  | 0.00 | 0.00 |
| ATOM | 770 | O2'  | RC5 | 24 | 2.147  | -22.300 | -10.853 | 0.00 | 0.00 |
| ATOM | 771 | 2HO' | RC5 | 24 | 2.290  | -21.606 | -11.172 | 0.00 | 0.00 |
| ATOM | 772 | O3'  | RC5 | 24 | 3.507  | -20.185 | -9.725  | 0.00 | 0.00 |
| ATOM | 773 | P    | RU  | 25 | 2.706  | -18.902 | -9.309  | 0.00 | 0.00 |
| ATOM | 774 | O1P  | RU  | 25 | 3.106  | -17.819 | -10.185 | 0.00 | 0.00 |
| ATOM | 775 | O2P  | RU  | 25 | 2.803  | -18.710 | -7.874  | 0.00 | 0.00 |
| ATOM | 776 | O5'  | RU  | 25 | 1.208  | -19.234 | -9.601  | 0.00 | 0.00 |
| ATOM | 777 | C5'  | RU  | 25 | 0.681  | -19.218 | -10.896 | 0.00 | 0.00 |
| ATOM | 778 | 1H5' | RU  | 25 | 1.203  | -19.920 | -11.518 | 0.00 | 0.00 |
| ATOM | 779 | 2H5' | RU  | 25 | 0.772  | -18.242 | -11.316 | 0.00 | 0.00 |
| ATOM | 780 | C4'  | RU  | 25 | -0.776 | -19.608 | -10.880 | 0.00 | 0.00 |
| ATOM | 781 | H4'  | RU  | 25 | -1.142 | -19.591 | -11.890 | 0.00 | 0.00 |
| ATOM | 782 | O4'  | RU  | 25 | -0.985 | -20.894 | -10.348 | 0.00 | 0.00 |
| ATOM | 783 | C1'  | RU  | 25 | -2.223 | -20.916 | -9.658  | 0.00 | 0.00 |
| ATOM | 784 | H1'  | RU  | 25 | -2.862 | -21.658 | -10.104 | 0.00 | 0.00 |
| ATOM | 785 | N1   | RU  | 25 | -2.061 | -21.230 | -8.222  | 0.00 | 0.00 |
| ATOM | 786 | C6   | RU  | 25 | -0.896 | -21.015 | -7.552  | 0.00 | 0.00 |
| ATOM | 787 | H6   | RU  | 25 | -0.089 | -20.553 | -8.060  | 0.00 | 0.00 |
| ATOM | 788 | C5   | RU  | 25 | -0.745 | -21.412 | -6.277  | 0.00 | 0.00 |
| ATOM | 789 | H5   | RU  | 25 | 0.171  | -21.257 | -5.767  | 0.00 | 0.00 |
| ATOM | 790 | C4   | RU  | 25 | -1.799 | -22.057 | -5.570  | 0.00 | 0.00 |
| ATOM | 791 | O4   | RU  | 25 | -1.734 | -22.477 | -4.441  | 0.00 | 0.00 |
| ATOM | 792 | N3   | RU  | 25 | -2.946 | -22.179 | -6.273  | 0.00 | 0.00 |
| ATOM | 793 | H3   | RU  | 25 | -3.721 | -22.573 | -5.797  | 0.00 | 0.00 |
| ATOM | 794 | C2   | RU  | 25 | -3.141 | -21.784 | -7.564  | 0.00 | 0.00 |
| ATOM | 795 | O2   | RU  | 25 | -4.226 | -21.917 | -8.066  | 0.00 | 0.00 |
| ATOM | 796 | C3'  | RU  | 25 | -1.639 | -18.672 | -10.055 | 0.00 | 0.00 |
| ATOM | 797 | H3'  | RU  | 25 | -1.159 | -18.505 | -9.104  | 0.00 | 0.00 |
| ATOM | 798 | C2'  | RU  | 25 | -2.859 | -19.546 | -9.849  | 0.00 | 0.00 |
| ATOM | 799 | 1H2' | RU  | 25 | -3.421 | -19.245 | -8.983  | 0.00 | 0.00 |
| ATOM | 800 | O2'  | RU  | 25 | -3.683 | -19.594 | -10.982 | 0.00 | 0.00 |
| ATOM | 801 | 2HO' | RU  | 25 | -4.236 | -19.381 | -10.967 | 0.00 | 0.00 |
| ATOM | 802 | O3'  | RU  | 25 | -1.913 | -17.452 | -10.696 | 0.00 | 0.00 |
| ATOM | 803 | P    | RU  | 26 | -2.279 | -16.153 | -9.887  | 0.00 | 0.00 |
| ATOM | 804 | O1P  | RU  | 26 | -2.452 | -15.076 | -10.860 | 0.00 | 0.00 |
| ATOM | 805 | O2P  | RU  | 26 | -1.289 | -15.992 | -8.809  | 0.00 | 0.00 |
| ATOM | 806 | O5'  | RU  | 26 | -3.677 | -16.470 | -9.234  | 0.00 | 0.00 |
| ATOM | 807 | C5'  | RU  | 26 | -4.858 | -16.485 | -10.003 | 0.00 | 0.00 |
| ATOM | 808 | 1H5' | RU  | 26 | -4.701 | -17.078 | -10.884 | 0.00 | 0.00 |
| ATOM | 809 | 2H5' | RU  | 26 | -5.100 | -15.487 | -10.317 | 0.00 | 0.00 |

|      |     |      |    |    |         |         |        |      |      |
|------|-----|------|----|----|---------|---------|--------|------|------|
| ATOM | 810 | C4'  | RU | 26 | -6.044  | -17.051 | -9.238 | 0.00 | 0.00 |
| ATOM | 811 | H4'  | RU | 26 | -6.881  | -17.097 | -9.919 | 0.00 | 0.00 |
| ATOM | 812 | O4'  | RU | 26 | -5.793  | -18.354 | -8.751 | 0.00 | 0.00 |
| ATOM | 813 | C1'  | RU | 26 | -6.487  | -18.539 | -7.532 | 0.00 | 0.00 |
| ATOM | 814 | H1'  | RU | 26 | -7.185  | -19.356 | -7.636 | 0.00 | 0.00 |
| ATOM | 815 | N1   | RU | 26 | -5.571  | -18.841 | -6.400 | 0.00 | 0.00 |
| ATOM | 816 | C6   | RU | 26 | -4.271  | -18.420 | -6.378 | 0.00 | 0.00 |
| ATOM | 817 | H6   | RU | 26 | -3.897  | -17.819 | -7.177 | 0.00 | 0.00 |
| ATOM | 818 | C5   | RU | 26 | -3.465  | -18.748 | -5.345 | 0.00 | 0.00 |
| ATOM | 819 | H5   | RU | 26 | -2.453  | -18.419 | -5.337 | 0.00 | 0.00 |
| ATOM | 820 | C4   | RU | 26 | -3.932  | -19.518 | -4.230 | 0.00 | 0.00 |
| ATOM | 821 | O4   | RU | 26 | -3.274  | -19.863 | -3.272 | 0.00 | 0.00 |
| ATOM | 822 | N3   | RU | 26 | -5.242  | -19.861 | -4.311 | 0.00 | 0.00 |
| ATOM | 823 | H3   | RU | 26 | -5.612  | -20.368 | -3.539 | 0.00 | 0.00 |
| ATOM | 824 | C2   | RU | 26 | -6.092  | -19.553 | -5.330 | 0.00 | 0.00 |
| ATOM | 825 | O2   | RU | 26 | -7.247  | -19.898 | -5.260 | 0.00 | 0.00 |
| ATOM | 826 | C3'  | RU | 26 | -6.464  | -16.223 | -8.038 | 0.00 | 0.00 |
| ATOM | 827 | H3'  | RU | 26 | -5.590  | -15.946 | -7.470 | 0.00 | 0.00 |
| ATOM | 828 | C2'  | RU | 26 | -7.278  | -17.260 | -7.275 | 0.00 | 0.00 |
| ATOM | 829 | 1H2' | RU | 26 | -7.323  | -17.021 | -6.231 | 0.00 | 0.00 |
| ATOM | 830 | O2'  | RU | 26 | -8.570  | -17.428 | -7.805 | 0.00 | 0.00 |
| ATOM | 831 | 2HO' | RU | 26 | -9.037  | -17.451 | -7.468 | 0.00 | 0.00 |
| ATOM | 832 | O3'  | RU | 26 | -7.212  | -15.095 | -8.411 | 0.00 | 0.00 |
| ATOM | 833 | P    | RG | 27 | -7.372  | -13.855 | -7.458 | 0.00 | 0.00 |
| ATOM | 834 | O1P  | RG | 27 | -8.199  | -12.879 | -8.149 | 0.00 | 0.00 |
| ATOM | 835 | O2P  | RG | 27 | -6.057  | -13.441 | -7.007 | 0.00 | 0.00 |
| ATOM | 836 | O5'  | RG | 27 | -8.151  | -14.362 | -6.193 | 0.00 | 0.00 |
| ATOM | 837 | C5'  | RG | 27 | -9.543  | -14.525 | -6.196 | 0.00 | 0.00 |
| ATOM | 838 | 1H5' | RG | 27 | -9.830  | -15.177 | -6.993 | 0.00 | 0.00 |
| ATOM | 839 | 2H5' | RG | 27 | -10.004 | -13.577 | -6.355 | 0.00 | 0.00 |
| ATOM | 840 | C4'  | RG | 27 | -10.053 | -15.079 | -4.888 | 0.00 | 0.00 |
| ATOM | 841 | H4'  | RG | 27 | -11.128 | -15.127 | -4.951 | 0.00 | 0.00 |
| ATOM | 842 | O4'  | RG | 27 | -9.559  | -16.372 | -4.630 | 0.00 | 0.00 |
| ATOM | 843 | C1'  | RG | 27 | -9.440  | -16.537 | -3.225 | 0.00 | 0.00 |
| ATOM | 844 | H1'  | RG | 27 | -10.040 | -17.370 | -2.895 | 0.00 | 0.00 |
| ATOM | 845 | N9   | RG | 27 | -8.040  | -16.798 | -2.842 | 0.00 | 0.00 |
| ATOM | 846 | C8   | RG | 27 | -6.894  | -16.457 | -3.491 | 0.00 | 0.00 |
| ATOM | 847 | H8   | RG | 27 | -6.891  | -15.933 | -4.422 | 0.00 | 0.00 |
| ATOM | 848 | N7   | RG | 27 | -5.804  | -16.822 | -2.882 | 0.00 | 0.00 |
| ATOM | 849 | C5   | RG | 27 | -6.262  | -17.411 | -1.711 | 0.00 | 0.00 |
| ATOM | 850 | C6   | RG | 27 | -5.571  | -17.960 | -0.584 | 0.00 | 0.00 |
| ATOM | 851 | O6   | RG | 27 | -4.378  | -18.108 | -0.407 | 0.00 | 0.00 |
| ATOM | 852 | N1   | RG | 27 | -6.402  | -18.350 | 0.429  | 0.00 | 0.00 |
| ATOM | 853 | H1   | RG | 27 | -5.984  | -18.721 | 1.251  | 0.00 | 0.00 |
| ATOM | 854 | C2   | RG | 27 | -7.737  | -18.261 | 0.367  | 0.00 | 0.00 |
| ATOM | 855 | N2   | RG | 27 | -8.401  | -18.625 | 1.409  | 0.00 | 0.00 |
| ATOM | 856 | H21  | RG | 27 | -7.915  | -18.920 | 2.221  | 0.00 | 0.00 |
| ATOM | 857 | H22  | RG | 27 | -9.381  | -18.536 | 1.376  | 0.00 | 0.00 |
| ATOM | 858 | N3   | RG | 27 | -8.427  | -17.785 | -0.652 | 0.00 | 0.00 |
| ATOM | 859 | C4   | RG | 27 | -7.633  | -17.371 | -1.669 | 0.00 | 0.00 |
| ATOM | 860 | C3'  | RG | 27 | -9.687  | -14.250 | -3.666 | 0.00 | 0.00 |
| ATOM | 861 | H3'  | RG | 27 | -8.631  | -14.042 | -3.701 | 0.00 | 0.00 |
| ATOM | 862 | C2'  | RG | 27 | -9.953  | -15.264 | -2.572 | 0.00 | 0.00 |
| ATOM | 863 | 1H2' | RG | 27 | -9.402  | -15.017 | -1.682 | 0.00 | 0.00 |
| ATOM | 864 | O2'  | RG | 27 | -11.318 | -15.423 | -2.289 | 0.00 | 0.00 |
| ATOM | 865 | 2HO' | RG | 27 | -11.655 | -14.872 | -2.163 | 0.00 | 0.00 |
| ATOM | 866 | O3'  | RG | 27 | -10.424 | -13.069 | -3.519 | 0.00 | 0.00 |
| ATOM | 867 | P    | RC | 28 | -9.849  | -11.852 | -2.707 | 0.00 | 0.00 |
| ATOM | 868 | O1P  | RC | 28 | -10.804 | -10.760 | -2.813 | 0.00 | 0.00 |
| ATOM | 869 | O2P  | RC | 28 | -8.477  | -11.621 | -3.144 | 0.00 | 0.00 |
| ATOM | 870 | O5'  | RC | 28 | -9.799  | -12.311 | -1.201 | 0.00 | 0.00 |
| ATOM | 871 | C5'  | RC | 28 | -10.976 | -12.476 | -0.440 | 0.00 | 0.00 |
| ATOM | 872 | 1H5' | RC | 28 | -11.679 | -13.076 | -0.988 | 0.00 | 0.00 |
| ATOM | 873 | 2H5' | RC | 28 | -11.419 | -11.518 | -0.250 | 0.00 | 0.00 |
| ATOM | 874 | C4'  | RC | 28 | -10.699 | -13.139 | 0.897  | 0.00 | 0.00 |
| ATOM | 875 | H4'  | RC | 28 | -11.642 | -13.301 | 1.396  | 0.00 | 0.00 |
| ATOM | 876 | O4'  | RC | 28 | -10.044 | -14.383 | 0.742  | 0.00 | 0.00 |
| ATOM | 877 | C1'  | RC | 28 | -9.209  | -14.604 | 1.865  | 0.00 | 0.00 |

|      |     |      |    |    |         |         |        |      |      |
|------|-----|------|----|----|---------|---------|--------|------|------|
| ATOM | 878 | H1'  | RC | 28 | -9.530  | -15.497 | 2.378  | 0.00 | 0.00 |
| ATOM | 879 | N1   | RC | 28 | -7.779  | -14.769 | 1.506  | 0.00 | 0.00 |
| ATOM | 880 | C6   | RC | 28 | -7.253  | -14.263 | 0.358  | 0.00 | 0.00 |
| ATOM | 881 | H6   | RC | 28 | -7.890  | -13.761 | -0.331 | 0.00 | 0.00 |
| ATOM | 882 | C5   | RC | 28 | -5.933  | -14.390 | 0.105  | 0.00 | 0.00 |
| ATOM | 883 | H5   | RC | 28 | -5.528  | -14.001 | -0.798 | 0.00 | 0.00 |
| ATOM | 884 | C4   | RC | 28 | -5.138  | -15.031 | 1.069  | 0.00 | 0.00 |
| ATOM | 885 | N4   | RC | 28 | -3.874  | -15.203 | 0.875  | 0.00 | 0.00 |
| ATOM | 886 | H41  | RC | 28 | -3.366  | -15.729 | 1.543  | 0.00 | 0.00 |
| ATOM | 887 | H42  | RC | 28 | -3.459  | -14.860 | 0.045  | 0.00 | 0.00 |
| ATOM | 888 | N3   | RC | 28 | -5.611  | -15.507 | 2.185  | 0.00 | 0.00 |
| ATOM | 889 | C2   | RC | 28 | -6.930  | -15.389 | 2.420  | 0.00 | 0.00 |
| ATOM | 890 | O2   | RC | 28 | -7.342  | -15.835 | 3.471  | 0.00 | 0.00 |
| ATOM | 891 | C3'  | RC | 28 | -9.820  | -12.312 | 1.824  | 0.00 | 0.00 |
| ATOM | 892 | H3'  | RC | 28 | -8.965  | -11.955 | 1.272  | 0.00 | 0.00 |
| ATOM | 893 | C2'  | RC | 28 | -9.393  | -13.406 | 2.790  | 0.00 | 0.00 |
| ATOM | 894 | 1H2' | RC | 28 | -8.475  | -13.131 | 3.286  | 0.00 | 0.00 |
| ATOM | 895 | O2'  | RC | 28 | -10.392 | -13.728 | 3.729  | 0.00 | 0.00 |
| ATOM | 896 | 2HO' | RC | 28 | -10.420 | -13.547 | 4.155  | 0.00 | 0.00 |
| ATOM | 897 | O3'  | RC | 28 | -10.497 | -11.262 | 2.481  | 0.00 | 0.00 |
| ATOM | 898 | P    | RU | 29 | -9.722  | -10.013 | 3.015  | 0.00 | 0.00 |
| ATOM | 899 | O1P  | RU | 29 | -10.698 | -9.143  | 3.658  | 0.00 | 0.00 |
| ATOM | 900 | O2P  | RU | 29 | -8.926  | -9.488  | 1.919  | 0.00 | 0.00 |
| ATOM | 901 | O5'  | RU | 29 | -8.718  | -10.544 | 4.119  | 0.00 | 0.00 |
| ATOM | 902 | C5'  | RU | 29 | -9.153  | -10.966 | 5.380  | 0.00 | 0.00 |
| ATOM | 903 | 1H5' | RU | 29 | -9.972  | -11.649 | 5.264  | 0.00 | 0.00 |
| ATOM | 904 | 2H5' | RU | 29 | -9.501  | -10.121 | 5.942  | 0.00 | 0.00 |
| ATOM | 905 | C4'  | RU | 29 | -8.042  | -11.655 | 6.156  | 0.00 | 0.00 |
| ATOM | 906 | H4'  | RU | 29 | -8.473  | -12.063 | 7.053  | 0.00 | 0.00 |
| ATOM | 907 | O4'  | RU | 29 | -7.458  | -12.718 | 5.430  | 0.00 | 0.00 |
| ATOM | 908 | C1'  | RU | 29 | -6.092  | -12.830 | 5.773  | 0.00 | 0.00 |
| ATOM | 909 | H1'  | RU | 29 | -5.911  | -13.803 | 6.192  | 0.00 | 0.00 |
| ATOM | 910 | N1   | RU | 29 | -5.177  | -12.653 | 4.623  | 0.00 | 0.00 |
| ATOM | 911 | C6   | RU | 29 | -5.524  | -11.940 | 3.517  | 0.00 | 0.00 |
| ATOM | 912 | H6   | RU | 29 | -6.487  | -11.488 | 3.462  | 0.00 | 0.00 |
| ATOM | 913 | C5   | RU | 29 | -4.657  | -11.788 | 2.496  | 0.00 | 0.00 |
| ATOM | 914 | H5   | RU | 29 | -4.938  | -11.209 | 1.650  | 0.00 | 0.00 |
| ATOM | 915 | C4   | RU | 29 | -3.343  | -12.350 | 2.528  | 0.00 | 0.00 |
| ATOM | 916 | O4   | RU | 29 | -2.523  | -12.268 | 1.642  | 0.00 | 0.00 |
| ATOM | 917 | N3   | RU | 29 | -3.054  | -13.035 | 3.666  | 0.00 | 0.00 |
| ATOM | 918 | H3   | RU | 29 | -2.139  | -13.412 | 3.742  | 0.00 | 0.00 |
| ATOM | 919 | C2   | RU | 29 | -3.901  | -13.197 | 4.727  | 0.00 | 0.00 |
| ATOM | 920 | O2   | RU | 29 | -3.505  | -13.789 | 5.713  | 0.00 | 0.00 |
| ATOM | 921 | C3'  | RU | 29 | -6.910  | -10.750 | 6.585  | 0.00 | 0.00 |
| ATOM | 922 | H3'  | RU | 29 | -6.628  | -10.122 | 5.765  | 0.00 | 0.00 |
| ATOM | 923 | C2'  | RU | 29 | -5.823  | -11.778 | 6.829  | 0.00 | 0.00 |
| ATOM | 924 | 1H2' | RU | 29 | -4.861  | -11.346 | 6.710  | 0.00 | 0.00 |
| ATOM | 925 | O2'  | RU | 29 | -5.932  | -12.389 | 8.063  | 0.00 | 0.00 |
| ATOM | 926 | 2HO' | RU | 29 | -6.072  | -11.806 | 8.611  | 0.00 | 0.00 |
| ATOM | 927 | O3'  | RU | 29 | -7.224  | -10.002 | 7.735  | 0.00 | 0.00 |
| ATOM | 928 | P    | RG | 30 | -6.381  | -8.749  | 8.178  | 0.00 | 0.00 |
| ATOM | 929 | O1P  | RG | 30 | -7.108  | -8.082  | 9.236  | 0.00 | 0.00 |
| ATOM | 930 | O2P  | RG | 30 | -6.026  | -7.997  | 6.994  | 0.00 | 0.00 |
| ATOM | 931 | O5'  | RG | 30 | -5.047  | -9.295  | 8.785  | 0.00 | 0.00 |
| ATOM | 932 | C5'  | RG | 30 | -4.993  | -9.947  | 10.019 | 0.00 | 0.00 |
| ATOM | 933 | 1H5' | RG | 30 | -5.597  | -10.830 | 9.986  | 0.00 | 0.00 |
| ATOM | 934 | 2H5' | RG | 30 | -5.377  | -9.319  | 10.795 | 0.00 | 0.00 |
| ATOM | 935 | C4'  | RG | 30 | -3.580  | -10.334 | 10.403 | 0.00 | 0.00 |
| ATOM | 936 | H4'  | RG | 30 | -3.635  | -10.961 | 11.273 | 0.00 | 0.00 |
| ATOM | 937 | O4'  | RG | 30 | -2.962  | -11.070 | 9.362  | 0.00 | 0.00 |
| ATOM | 938 | C1'  | RG | 30 | -1.816  | -10.376 | 8.932  | 0.00 | 0.00 |
| ATOM | 939 | H1'  | RG | 30 | -0.949  | -10.774 | 9.437  | 0.00 | 0.00 |
| ATOM | 940 | N9   | RG | 30 | -1.619  | -10.482 | 7.480  | 0.00 | 0.00 |
| ATOM | 941 | C8   | RG | 30 | -2.403  | -10.021 | 6.469  | 0.00 | 0.00 |
| ATOM | 942 | H8   | RG | 30 | -3.326  | -9.541  | 6.679  | 0.00 | 0.00 |
| ATOM | 943 | N7   | RG | 30 | -1.931  | -10.194 | 5.280  | 0.00 | 0.00 |
| ATOM | 944 | C5   | RG | 30 | -0.713  | -10.798 | 5.503  | 0.00 | 0.00 |
| ATOM | 945 | C6   | RG | 30 | 0.318   | -11.198 | 4.609  | 0.00 | 0.00 |

|      |      |      |    |    |        |         |        |      |      |
|------|------|------|----|----|--------|---------|--------|------|------|
| ATOM | 946  | O6   | RG | 30 | 0.365  | -11.130 | 3.391  | 0.00 | 0.00 |
| ATOM | 947  | N1   | RG | 30 | 1.405  | -11.723 | 5.239  | 0.00 | 0.00 |
| ATOM | 948  | H1   | RG | 30 | 2.155  | -12.032 | 4.671  | 0.00 | 0.00 |
| ATOM | 949  | C2   | RG | 30 | 1.500  | -11.857 | 6.576  | 0.00 | 0.00 |
| ATOM | 950  | N2   | RG | 30 | 2.590  | -12.339 | 7.049  | 0.00 | 0.00 |
| ATOM | 951  | H21  | RG | 30 | 3.333  | -12.569 | 6.431  | 0.00 | 0.00 |
| ATOM | 952  | H22  | RG | 30 | 2.659  | -12.446 | 8.031  | 0.00 | 0.00 |
| ATOM | 953  | N3   | RG | 30 | 0.566  | -11.515 | 7.440  | 0.00 | 0.00 |
| ATOM | 954  | C4   | RG | 30 | -0.523 | -10.978 | 6.847  | 0.00 | 0.00 |
| ATOM | 955  | C3'  | RG | 30 | -2.703 | -9.134  | 10.724 | 0.00 | 0.00 |
| ATOM | 956  | H3'  | RG | 30 | -3.291 | -8.268  | 10.973 | 0.00 | 0.00 |
| ATOM | 957  | C2'  | RG | 30 | -1.989 | -8.936  | 9.384  | 0.00 | 0.00 |
| ATOM | 958  | 1H2' | RG | 30 | -2.661 | -8.415  | 8.721  | 0.00 | 0.00 |
| ATOM | 959  | O2'  | RG | 30 | -0.770 | -8.231  | 9.472  | 0.00 | 0.00 |
| ATOM | 960  | 2HO' | RG | 30 | -0.969 | -7.320  | 9.585  | 0.00 | 0.00 |
| ATOM | 961  | O3'  | RG | 30 | -1.798 | -9.457  | 11.763 | 0.00 | 0.00 |
| ATOM | 962  | P    | RA | 31 | -2.197 | -9.357  | 13.285 | 0.00 | 0.00 |
| ATOM | 963  | O1P  | RA | 31 | -1.213 | -10.120 | 14.048 | 0.00 | 0.00 |
| ATOM | 964  | O2P  | RA | 31 | -3.605 | -9.675  | 13.441 | 0.00 | 0.00 |
| ATOM | 965  | O5'  | RA | 31 | -1.979 | -7.846  | 13.620 | 0.00 | 0.00 |
| ATOM | 966  | C5'  | RA | 31 | -3.019 | -6.958  | 13.781 | 0.00 | 0.00 |
| ATOM | 967  | 1H5' | RA | 31 | -3.508 | -7.143  | 14.706 | 0.00 | 0.00 |
| ATOM | 968  | 2H5' | RA | 31 | -3.723 | -7.092  | 12.999 | 0.00 | 0.00 |
| ATOM | 969  | C4'  | RA | 31 | -2.555 | -5.520  | 13.733 | 0.00 | 0.00 |
| ATOM | 970  | H4'  | RA | 31 | -3.395 | -4.881  | 13.864 | 0.00 | 0.00 |
| ATOM | 971  | O4'  | RA | 31 | -1.626 | -5.224  | 14.730 | 0.00 | 0.00 |
| ATOM | 972  | C1'  | RA | 31 | -0.786 | -4.198  | 14.265 | 0.00 | 0.00 |
| ATOM | 973  | H1'  | RA | 31 | -0.961 | -3.312  | 14.832 | 0.00 | 0.00 |
| ATOM | 974  | N9   | RA | 31 | 0.589  | -4.599  | 14.486 | 0.00 | 0.00 |
| ATOM | 975  | C8   | RA | 31 | 1.425  | -5.276  | 13.714 | 0.00 | 0.00 |
| ATOM | 976  | H8   | RA | 31 | 1.133  | -5.637  | 12.793 | 0.00 | 0.00 |
| ATOM | 977  | N7   | RA | 31 | 2.594  | -5.451  | 14.205 | 0.00 | 0.00 |
| ATOM | 978  | C5   | RA | 31 | 2.524  | -4.835  | 15.390 | 0.00 | 0.00 |
| ATOM | 979  | C6   | RA | 31 | 3.407  | -4.601  | 16.414 | 0.00 | 0.00 |
| ATOM | 980  | N6   | RA | 31 | 4.624  | -4.994  | 16.469 | 0.00 | 0.00 |
| ATOM | 981  | H61  | RA | 31 | 5.148  | -4.764  | 17.239 | 0.00 | 0.00 |
| ATOM | 982  | H62  | RA | 31 | 4.988  | -5.489  | 15.750 | 0.00 | 0.00 |
| ATOM | 983  | N1   | RA | 31 | 3.047  | -3.940  | 17.448 | 0.00 | 0.00 |
| ATOM | 984  | C2   | RA | 31 | 1.834  | -3.505  | 17.476 | 0.00 | 0.00 |
| ATOM | 985  | H2   | RA | 31 | 1.565  | -2.975  | 18.320 | 0.00 | 0.00 |
| ATOM | 986  | N3   | RA | 31 | 0.897  | -3.634  | 16.602 | 0.00 | 0.00 |
| ATOM | 987  | C4   | RA | 31 | 1.308  | -4.312  | 15.569 | 0.00 | 0.00 |
| ATOM | 988  | C3'  | RA | 31 | -1.912 | -5.149  | 12.422 | 0.00 | 0.00 |
| ATOM | 989  | H3'  | RA | 31 | -1.212 | -5.924  | 12.159 | 0.00 | 0.00 |
| ATOM | 990  | C2'  | RA | 31 | -1.138 | -3.904  | 12.831 | 0.00 | 0.00 |
| ATOM | 991  | 1H2' | RA | 31 | -0.275 | -3.772  | 12.222 | 0.00 | 0.00 |
| ATOM | 992  | O2'  | RA | 31 | -1.922 | -2.748  | 12.821 | 0.00 | 0.00 |
| ATOM | 993  | 2HO' | RA | 31 | -1.822 | -2.337  | 12.085 | 0.00 | 0.00 |
| ATOM | 994  | O3'  | RA | 31 | -2.868 | -4.957  | 11.407 | 0.00 | 0.00 |
| ATOM | 995  | P    | RA | 32 | -2.459 | -4.840  | 9.898  | 0.00 | 0.00 |
| ATOM | 996  | O1P  | RA | 32 | -3.643 | -5.083  | 9.089  | 0.00 | 0.00 |
| ATOM | 997  | O2P  | RA | 32 | -1.275 | -5.655  | 9.676  | 0.00 | 0.00 |
| ATOM | 998  | O5'  | RA | 32 | -2.042 | -3.333  | 9.720  | 0.00 | 0.00 |
| ATOM | 999  | C5'  | RA | 32 | -2.983 | -2.302  | 9.757  | 0.00 | 0.00 |
| ATOM | 1000 | 1H5' | RA | 32 | -3.577 | -2.396  | 10.644 | 0.00 | 0.00 |
| ATOM | 1001 | 2H5' | RA | 32 | -3.626 | -2.386  | 8.912  | 0.00 | 0.00 |
| ATOM | 1002 | C4'  | RA | 32 | -2.344 | -0.923  | 9.755  | 0.00 | 0.00 |
| ATOM | 1003 | H4'  | RA | 32 | -3.117 | -0.210  | 9.952  | 0.00 | 0.00 |
| ATOM | 1004 | O4'  | RA | 32 | -1.377 | -0.836  | 10.784 | 0.00 | 0.00 |
| ATOM | 1005 | C1'  | RA | 32 | -0.121 | -0.546  | 10.209 | 0.00 | 0.00 |
| ATOM | 1006 | H1'  | RA | 32 | 0.033  | 0.518   | 10.243 | 0.00 | 0.00 |
| ATOM | 1007 | N9   | RA | 32 | 0.997  | -1.199  | 10.909 | 0.00 | 0.00 |
| ATOM | 1008 | C8   | RA | 32 | 2.005  | -1.938  | 10.414 | 0.00 | 0.00 |
| ATOM | 1009 | H8   | RA | 32 | 2.037  | -2.211  | 9.402  | 0.00 | 0.00 |
| ATOM | 1010 | N7   | RA | 32 | 2.911  | -2.281  | 11.264 | 0.00 | 0.00 |
| ATOM | 1011 | C5   | RA | 32 | 2.486  | -1.697  | 12.419 | 0.00 | 0.00 |
| ATOM | 1012 | C6   | RA | 32 | 2.979  | -1.624  | 13.720 | 0.00 | 0.00 |
| ATOM | 1013 | N6   | RA | 32 | 4.069  | -2.167  | 14.147 | 0.00 | 0.00 |



|      |      |      |    |    |        |        |        |      |      |
|------|------|------|----|----|--------|--------|--------|------|------|
| ATOM | 1014 | H61  | RA | 32 | 4.315  | -2.025 | 15.084 | 0.00 | 0.00 |
| ATOM | 1015 | H62  | RA | 32 | 4.642  | -2.633 | 13.526 | 0.00 | 0.00 |
| ATOM | 1016 | N1   | RA | 32 | 2.337  | -0.982 | 14.645 | 0.00 | 0.00 |
| ATOM | 1017 | C2   | RA | 32 | 1.237  | -0.385 | 14.294 | 0.00 | 0.00 |
| ATOM | 1018 | H2   | RA | 32 | 0.744  | 0.137  | 15.053 | 0.00 | 0.00 |
| ATOM | 1019 | N3   | RA | 32 | 0.652  | -0.354 | 13.120 | 0.00 | 0.00 |
| ATOM | 1020 | C4   | RA | 32 | 1.333  | -1.032 | 12.209 | 0.00 | 0.00 |
| ATOM | 1021 | C3'  | RA | 32 | -1.670 | -0.553 | 8.444  | 0.00 | 0.00 |
| ATOM | 1022 | H3'  | RA | 32 | -2.076 | -1.105 | 7.617  | 0.00 | 0.00 |
| ATOM | 1023 | C2'  | RA | 32 | -0.247 | -0.958 | 8.763  | 0.00 | 0.00 |
| ATOM | 1024 | 1H2' | RA | 32 | -0.174 | -2.025 | 8.698  | 0.00 | 0.00 |
| ATOM | 1025 | O2'  | RA | 32 | 0.715  | -0.359 | 7.944  | 0.00 | 0.00 |
| ATOM | 1026 | 2HO' | RA | 32 | 0.303  | 0.143  | 7.301  | 0.00 | 0.00 |
| ATOM | 1027 | O3'  | RA | 32 | -1.830 | 0.831  | 8.276  | 0.00 | 0.00 |
| ATOM | 1028 | P    | RG | 33 | -1.723 | 1.557  | 6.888  | 0.00 | 0.00 |
| ATOM | 1029 | O1P  | RG | 33 | -0.616 | 0.974  | 6.148  | 0.00 | 0.00 |
| ATOM | 1030 | O2P  | RG | 33 | -1.704 | 2.980  | 7.166  | 0.00 | 0.00 |
| ATOM | 1031 | O5'  | RG | 33 | -3.048 | 1.223  | 6.119  | 0.00 | 0.00 |
| ATOM | 1032 | C5'  | RG | 33 | -4.317 | 1.578  | 6.576  | 0.00 | 0.00 |
| ATOM | 1033 | 1H5' | RG | 33 | -4.253 | 2.330  | 7.330  | 0.00 | 0.00 |
| ATOM | 1034 | 2H5' | RG | 33 | -4.764 | 0.721  | 7.011  | 0.00 | 0.00 |
| ATOM | 1035 | C4'  | RG | 33 | -5.224 | 2.084  | 5.483  | 0.00 | 0.00 |
| ATOM | 1036 | H4'  | RG | 33 | -6.198 | 2.223  | 5.900  | 0.00 | 0.00 |
| ATOM | 1037 | O4'  | RG | 33 | -4.786 | 3.327  | 5.001  | 0.00 | 0.00 |
| ATOM | 1038 | C1'  | RG | 33 | -4.980 | 3.394  | 3.599  | 0.00 | 0.00 |
| ATOM | 1039 | H1'  | RG | 33 | -5.540 | 4.270  | 3.331  | 0.00 | 0.00 |
| ATOM | 1040 | N9   | RG | 33 | -3.694 | 3.459  | 2.896  | 0.00 | 0.00 |
| ATOM | 1041 | C8   | RG | 33 | -2.437 | 3.347  | 3.406  | 0.00 | 0.00 |
| ATOM | 1042 | H8   | RG | 33 | -2.259 | 3.152  | 4.437  | 0.00 | 0.00 |
| ATOM | 1043 | N7   | RG | 33 | -1.484 | 3.523  | 2.544  | 0.00 | 0.00 |
| ATOM | 1044 | C5   | RG | 33 | -2.160 | 3.779  | 1.362  | 0.00 | 0.00 |
| ATOM | 1045 | C6   | RG | 33 | -1.680 | 4.108  | 0.058  | 0.00 | 0.00 |
| ATOM | 1046 | O6   | RG | 33 | -0.527 | 4.250  | -0.331 | 0.00 | 0.00 |
| ATOM | 1047 | N1   | RG | 33 | -2.684 | 4.314  | -0.851 | 0.00 | 0.00 |
| ATOM | 1048 | H1   | RG | 33 | -2.420 | 4.553  | -1.780 | 0.00 | 0.00 |
| ATOM | 1049 | C2   | RG | 33 | -3.995 | 4.234  | -0.550 | 0.00 | 0.00 |
| ATOM | 1050 | N2   | RG | 33 | -4.834 | 4.429  | -1.518 | 0.00 | 0.00 |
| ATOM | 1051 | H21  | RG | 33 | -5.803 | 4.358  | -1.317 | 0.00 | 0.00 |
| ATOM | 1052 | H22  | RG | 33 | -4.483 | 4.605  | -2.432 | 0.00 | 0.00 |
| ATOM | 1053 | N3   | RG | 33 | -4.484 | 3.958  | 0.642  | 0.00 | 0.00 |
| ATOM | 1054 | C4   | RG | 33 | -3.515 | 3.729  | 1.566  | 0.00 | 0.00 |
| ATOM | 1055 | C3'  | RG | 33 | -5.374 | 1.164  | 4.286  | 0.00 | 0.00 |
| ATOM | 1056 | H3'  | RG | 33 | -4.417 | 0.748  | 4.051  | 0.00 | 0.00 |
| ATOM | 1057 | C2'  | RG | 33 | -5.772 | 2.155  | 3.214  | 0.00 | 0.00 |
| ATOM | 1058 | 1H2' | RG | 33 | -5.496 | 1.802  | 2.246  | 0.00 | 0.00 |
| ATOM | 1059 | O2'  | RG | 33 | -7.132 | 2.469  | 3.259  | 0.00 | 0.00 |
| ATOM | 1060 | 2HO' | RG | 33 | -7.494 | 2.111  | 3.199  | 0.00 | 0.00 |
| ATOM | 1061 | O3'  | RG | 33 | -6.349 | 0.176  | 4.483  | 0.00 | 0.00 |
| ATOM | 1062 | P    | RC | 34 | -6.280 | -1.199 | 3.752  | 0.00 | 0.00 |
| ATOM | 1063 | O1P  | RC | 34 | -7.468 | -1.935 | 4.116  | 0.00 | 0.00 |
| ATOM | 1064 | O2P  | RC | 34 | -4.997 | -1.781 | 4.041  | 0.00 | 0.00 |
| ATOM | 1065 | O5'  | RC | 34 | -6.337 | -0.882 | 2.221  | 0.00 | 0.00 |
| ATOM | 1066 | C5'  | RC | 34 | -7.533 | -0.570 | 1.569  | 0.00 | 0.00 |
| ATOM | 1067 | 1H5' | RC | 34 | -7.998 | 0.274  | 2.036  | 0.00 | 0.00 |
| ATOM | 1068 | 2H5' | RC | 34 | -8.203 | -1.404 | 1.632  | 0.00 | 0.00 |
| ATOM | 1069 | C4'  | RC | 34 | -7.323 | -0.263 | 0.100  | 0.00 | 0.00 |
| ATOM | 1070 | H4'  | RC | 34 | -8.273 | -0.047 | -0.343 | 0.00 | 0.00 |
| ATOM | 1071 | O4'  | RC | 34 | -6.465 | 0.844  | -0.077 | 0.00 | 0.00 |
| ATOM | 1072 | C1'  | RC | 34 | -5.827 | 0.717  | -1.333 | 0.00 | 0.00 |
| ATOM | 1073 | H1'  | RC | 34 | -6.188 | 1.487  | -1.987 | 0.00 | 0.00 |
| ATOM | 1074 | N1   | RC | 34 | -4.354 | 0.810  | -1.243 | 0.00 | 0.00 |
| ATOM | 1075 | C6   | RC | 34 | -3.664 | 0.436  | -0.130 | 0.00 | 0.00 |
| ATOM | 1076 | H6   | RC | 34 | -4.193 | 0.093  | 0.727  | 0.00 | 0.00 |
| ATOM | 1077 | C5   | RC | 34 | -2.319 | 0.515  | -0.115 | 0.00 | 0.00 |
| ATOM | 1078 | H5   | RC | 34 | -1.772 | 0.221  | 0.751  | 0.00 | 0.00 |
| ATOM | 1079 | C4   | RC | 34 | -1.677 | 0.972  | -1.281 | 0.00 | 0.00 |
| ATOM | 1080 | N4   | RC | 34 | -0.391 | 1.068  | -1.324 | 0.00 | 0.00 |
| ATOM | 1081 | H41  | RC | 34 | -0.000 | 1.379  | -2.175 | 0.00 | 0.00 |

|      |      |      |    |    |        |        |        |      |      |
|------|------|------|----|----|--------|--------|--------|------|------|
| ATOM | 1082 | H42  | RC | 34 | 0.145  | 0.788  | -0.552 | 0.00 | 0.00 |
| ATOM | 1083 | N3   | RC | 34 | -2.317 | 1.350  | -2.350 | 0.00 | 0.00 |
| ATOM | 1084 | C2   | RC | 34 | -3.659 | 1.254  | -2.357 | 0.00 | 0.00 |
| ATOM | 1085 | O2   | RC | 34 | -4.240 | 1.560  | -3.384 | 0.00 | 0.00 |
| ATOM | 1086 | C3'  | RC | 34 | -6.706 | -1.392 | -0.691 | 0.00 | 0.00 |
| ATOM | 1087 | H3'  | RC | 34 | -5.860 | -1.741 | -0.140 | 0.00 | 0.00 |
| ATOM | 1088 | C2'  | RC | 34 | -6.238 | -0.630 | -1.906 | 0.00 | 0.00 |
| ATOM | 1089 | 1H2' | RC | 34 | -5.414 | -1.127 | -2.359 | 0.00 | 0.00 |
| ATOM | 1090 | O2'  | RC | 34 | -7.256 | -0.411 | -2.823 | 0.00 | 0.00 |
| ATOM | 1091 | 2HO' | RC | 34 | -7.399 | -0.934 | -3.194 | 0.00 | 0.00 |
| ATOM | 1092 | O3'  | RC | 34 | -7.599 | -2.441 | -0.991 | 0.00 | 0.00 |
| ATOM | 1093 | P    | RG | 35 | -7.069 | -3.853 | -1.443 | 0.00 | 0.00 |
| ATOM | 1094 | O1P  | RG | 35 | -8.202 | -4.771 | -1.505 | 0.00 | 0.00 |
| ATOM | 1095 | O2P  | RG | 35 | -5.913 | -4.201 | -0.625 | 0.00 | 0.00 |
| ATOM | 1096 | O5'  | RG | 35 | -6.536 | -3.634 | -2.913 | 0.00 | 0.00 |
| ATOM | 1097 | C5'  | RG | 35 | -7.390 | -3.562 | -4.025 | 0.00 | 0.00 |
| ATOM | 1098 | 1H5' | RG | 35 | -8.086 | -2.752 | -3.901 | 0.00 | 0.00 |
| ATOM | 1099 | 2H5' | RG | 35 | -7.942 | -4.477 | -4.122 | 0.00 | 0.00 |
| ATOM | 1100 | C4'  | RG | 35 | -6.603 | -3.350 | -5.306 | 0.00 | 0.00 |
| ATOM | 1101 | H4'  | RG | 35 | -7.291 | -3.363 | -6.134 | 0.00 | 0.00 |
| ATOM | 1102 | O4'  | RG | 35 | -5.906 | -2.125 | -5.319 | 0.00 | 0.00 |
| ATOM | 1103 | C1'  | RG | 35 | -4.710 | -2.282 | -6.080 | 0.00 | 0.00 |
| ATOM | 1104 | H1'  | RG | 35 | -4.685 | -1.595 | -6.911 | 0.00 | 0.00 |
| ATOM | 1105 | N9   | RG | 35 | -3.528 | -2.023 | -5.239 | 0.00 | 0.00 |
| ATOM | 1106 | C8   | RG | 35 | -3.366 | -2.231 | -3.898 | 0.00 | 0.00 |
| ATOM | 1107 | H8   | RG | 35 | -4.125 | -2.674 | -3.291 | 0.00 | 0.00 |
| ATOM | 1108 | N7   | RG | 35 | -2.214 | -1.858 | -3.440 | 0.00 | 0.00 |
| ATOM | 1109 | C5   | RG | 35 | -1.552 | -1.365 | -4.562 | 0.00 | 0.00 |
| ATOM | 1110 | C6   | RG | 35 | -0.247 | -0.788 | -4.725 | 0.00 | 0.00 |
| ATOM | 1111 | O6   | RG | 35 | 0.608  | -0.524 | -3.889 | 0.00 | 0.00 |
| ATOM | 1112 | N1   | RG | 35 | 0.055  | -0.497 | -6.033 | 0.00 | 0.00 |
| ATOM | 1113 | H1   | RG | 35 | 0.960  | -0.134 | -6.227 | 0.00 | 0.00 |
| ATOM | 1114 | C2   | RG | 35 | -0.792 | -0.709 | -7.056 | 0.00 | 0.00 |
| ATOM | 1115 | N2   | RG | 35 | -0.377 | -0.385 | -8.228 | 0.00 | 0.00 |
| ATOM | 1116 | H21  | RG | 35 | 0.550  | -0.053 | -8.347 | 0.00 | 0.00 |
| ATOM | 1117 | H22  | RG | 35 | -0.984 | -0.526 | -8.979 | 0.00 | 0.00 |
| ATOM | 1118 | N3   | RG | 35 | -2.013 | -1.202 | -6.952 | 0.00 | 0.00 |
| ATOM | 1119 | C4   | RG | 35 | -2.339 | -1.515 | -5.673 | 0.00 | 0.00 |
| ATOM | 1120 | C3'  | RG | 35 | -5.548 | -4.410 | -5.550 | 0.00 | 0.00 |
| ATOM | 1121 | H3'  | RG | 35 | -4.956 | -4.547 | -4.658 | 0.00 | 0.00 |
| ATOM | 1122 | C2'  | RG | 35 | -4.700 | -3.710 | -6.606 | 0.00 | 0.00 |
| ATOM | 1123 | 1H2' | RG | 35 | -3.700 | -4.112 | -6.641 | 0.00 | 0.00 |
| ATOM | 1124 | O2'  | RG | 35 | -5.298 | -3.735 | -7.876 | 0.00 | 0.00 |
| ATOM | 1125 | 2HO' | RG | 35 | -4.930 | -3.888 | -8.359 | 0.00 | 0.00 |
| ATOM | 1126 | O3'  | RG | 35 | -6.098 | -5.641 | -5.963 | 0.00 | 0.00 |
| ATOM | 1127 | P    | RC | 36 | -5.341 | -6.998 | -5.734 | 0.00 | 0.00 |
| ATOM | 1128 | O1P  | RC | 36 | -6.246 | -8.070 | -6.152 | 0.00 | 0.00 |
| ATOM | 1129 | O2P  | RC | 36 | -4.814 | -7.027 | -4.360 | 0.00 | 0.00 |
| ATOM | 1130 | O5'  | RC | 36 | -4.118 | -6.960 | -6.729 | 0.00 | 0.00 |
| ATOM | 1131 | C5'  | RC | 36 | -4.293 | -7.089 | -8.121 | 0.00 | 0.00 |
| ATOM | 1132 | 1H5' | RC | 36 | -5.053 | -6.409 | -8.459 | 0.00 | 0.00 |
| ATOM | 1133 | 2H5' | RC | 36 | -4.601 | -8.093 | -8.355 | 0.00 | 0.00 |
| ATOM | 1134 | C4'  | RC | 36 | -3.015 | -6.793 | -8.893 | 0.00 | 0.00 |
| ATOM | 1135 | H4'  | RC | 36 | -3.219 | -6.919 | -9.946 | 0.00 | 0.00 |
| ATOM | 1136 | O4'  | RC | 36 | -2.556 | -5.471 | -8.672 | 0.00 | 0.00 |
| ATOM | 1137 | C1'  | RC | 36 | -1.136 | -5.457 | -8.685 | 0.00 | 0.00 |
| ATOM | 1138 | H1'  | RC | 36 | -0.792 | -4.787 | -9.458 | 0.00 | 0.00 |
| ATOM | 1139 | N1   | RC | 36 | -0.565 | -5.020 | -7.375 | 0.00 | 0.00 |
| ATOM | 1140 | C6   | RC | 36 | -1.213 | -5.223 | -6.196 | 0.00 | 0.00 |
| ATOM | 1141 | H6   | RC | 36 | -2.140 | -5.749 | -6.192 | 0.00 | 0.00 |
| ATOM | 1142 | C5   | RC | 36 | -0.698 | -4.768 | -5.042 | 0.00 | 0.00 |
| ATOM | 1143 | H5   | RC | 36 | -1.218 | -4.916 | -4.122 | 0.00 | 0.00 |
| ATOM | 1144 | C4   | RC | 36 | 0.548  | -4.129 | -5.105 | 0.00 | 0.00 |
| ATOM | 1145 | N4   | RC | 36 | 1.102  | -3.698 | -4.037 | 0.00 | 0.00 |
| ATOM | 1146 | H41  | RC | 36 | 1.980  | -3.257 | -4.119 | 0.00 | 0.00 |
| ATOM | 1147 | H42  | RC | 36 | 0.661  | -3.830 | -3.169 | 0.00 | 0.00 |
| ATOM | 1148 | N3   | RC | 36 | 1.201  | -3.929 | -6.221 | 0.00 | 0.00 |
| ATOM | 1149 | C2   | RC | 36 | 0.667  | -4.381 | -7.370 | 0.00 | 0.00 |

|      |      |      |    |    |        |         |         |      |      |
|------|------|------|----|----|--------|---------|---------|------|------|
| ATOM | 1150 | O2   | RC | 36 | 1.303  | -4.215  | -8.395  | 0.00 | 0.00 |
| ATOM | 1151 | C3'  | RC | 36 | -1.866 | -7.709  | -8.535  | 0.00 | 0.00 |
| ATOM | 1152 | H3'  | RC | 36 | -1.799 | -7.808  | -7.462  | 0.00 | 0.00 |
| ATOM | 1153 | C2'  | RC | 36 | -0.695 | -6.870  | -9.037  | 0.00 | 0.00 |
| ATOM | 1154 | 1H2' | RC | 36 | 0.219  | -7.142  | -8.541  | 0.00 | 0.00 |
| ATOM | 1155 | O2'  | RC | 36 | -0.531 | -6.953  | -10.435 | 0.00 | 0.00 |
| ATOM | 1156 | 2HO' | RC | 36 | -0.348 | -7.510  | -10.651 | 0.00 | 0.00 |
| ATOM | 1157 | O3'  | RC | 36 | -1.949 | -8.975  | -9.148  | 0.00 | 0.00 |
| ATOM | 1158 | P    | RG | 37 | -1.224 | -10.230 | -8.533  | 0.00 | 0.00 |
| ATOM | 1159 | O1P  | RG | 37 | -1.583 | -11.402 | -9.325  | 0.00 | 0.00 |
| ATOM | 1160 | O2P  | RG | 37 | -1.468 | -10.244 | -7.100  | 0.00 | 0.00 |
| ATOM | 1161 | O5'  | RG | 37 | 0.309  | -9.948  | -8.735  | 0.00 | 0.00 |
| ATOM | 1162 | C5'  | RG | 37 | 0.936  | -10.100 | -9.977  | 0.00 | 0.00 |
| ATOM | 1163 | 1H5' | RG | 37 | 0.419  | -9.534  | -10.725 | 0.00 | 0.00 |
| ATOM | 1164 | 2H5' | RG | 37 | 0.917  | -11.133 | -10.261 | 0.00 | 0.00 |
| ATOM | 1165 | C4'  | RG | 37 | 2.381  | -9.623  | -9.918  | 0.00 | 0.00 |
| ATOM | 1166 | H4'  | RG | 37 | 2.812  | -9.760  | -10.894 | 0.00 | 0.00 |
| ATOM | 1167 | O4'  | RG | 37 | 2.500  | -8.257  | -9.575  | 0.00 | 0.00 |
| ATOM | 1168 | C1'  | RG | 37 | 3.669  | -8.077  | -8.798  | 0.00 | 0.00 |
| ATOM | 1169 | H1'  | RG | 37 | 4.311  | -7.337  | -9.243  | 0.00 | 0.00 |
| ATOM | 1170 | N9   | RG | 37 | 3.319  | -7.625  | -7.439  | 0.00 | 0.00 |
| ATOM | 1171 | C8   | RG | 37 | 2.175  | -7.816  | -6.727  | 0.00 | 0.00 |
| ATOM | 1172 | H8   | RG | 37 | 1.357  | -8.389  | -7.098  | 0.00 | 0.00 |
| ATOM | 1173 | N7   | RG | 37 | 2.153  | -7.235  | -5.568  | 0.00 | 0.00 |
| ATOM | 1174 | C5   | RG | 37 | 3.410  | -6.648  | -5.475  | 0.00 | 0.00 |
| ATOM | 1175 | C6   | RG | 37 | 4.035  | -5.885  | -4.442  | 0.00 | 0.00 |
| ATOM | 1176 | O6   | RG | 37 | 3.579  | -5.491  | -3.383  | 0.00 | 0.00 |
| ATOM | 1177 | N1   | RG | 37 | 5.338  | -5.574  | -4.712  | 0.00 | 0.00 |
| ATOM | 1178 | H1   | RG | 37 | 5.855  | -5.113  | -4.001  | 0.00 | 0.00 |
| ATOM | 1179 | C2   | RG | 37 | 5.960  | -5.892  | -5.858  | 0.00 | 0.00 |
| ATOM | 1180 | N2   | RG | 37 | 7.197  | -5.569  | -5.964  | 0.00 | 0.00 |
| ATOM | 1181 | H21  | RG | 37 | 7.663  | -5.143  | -5.205  | 0.00 | 0.00 |
| ATOM | 1182 | H22  | RG | 37 | 7.656  | -5.782  | -6.810  | 0.00 | 0.00 |
| ATOM | 1183 | N3   | RG | 37 | 5.416  | -6.549  | -6.863  | 0.00 | 0.00 |
| ATOM | 1184 | C4   | RG | 37 | 4.135  | -6.914  | -6.610  | 0.00 | 0.00 |
| ATOM | 1185 | C3'  | RG | 37 | 3.233  | -10.381 | -8.924  | 0.00 | 0.00 |
| ATOM | 1186 | H3'  | RG | 37 | 2.705  | -10.452 | -7.990  | 0.00 | 0.00 |
| ATOM | 1187 | C2'  | RG | 37 | 4.394  | -9.409  | -8.761  | 0.00 | 0.00 |
| ATOM | 1188 | 1H2' | RG | 37 | 4.899  | -9.554  | -7.824  | 0.00 | 0.00 |
| ATOM | 1189 | O2'  | RG | 37 | 5.308  | -9.462  | -9.831  | 0.00 | 0.00 |
| ATOM | 1190 | 2HO' | RG | 37 | 5.496  | -10.015 | -10.015 | 0.00 | 0.00 |
| ATOM | 1191 | O3'  | RG | 37 | 3.630  | -11.642 | -9.395  | 0.00 | 0.00 |
| ATOM | 1192 | P    | RC | 38 | 3.846  | -12.836 | -8.422  | 0.00 | 0.00 |
| ATOM | 1193 | O1P  | RC | 38 | 4.147  | -14.015 | -9.199  | 0.00 | 0.00 |
| ATOM | 1194 | O2P  | RC | 38 | 2.721  | -12.871 | -7.522  | 0.00 | 0.00 |
| ATOM | 1195 | O5'  | RC | 38 | 5.108  | -12.464 | -7.593  | 0.00 | 0.00 |
| ATOM | 1196 | C5'  | RC | 38 | 6.384  | -12.508 | -8.141  | 0.00 | 0.00 |
| ATOM | 1197 | 1H5' | RC | 38 | 6.390  | -11.983 | -9.065  | 0.00 | 0.00 |
| ATOM | 1198 | 2H5' | RC | 38 | 6.673  | -13.522 | -8.321  | 0.00 | 0.00 |
| ATOM | 1199 | C4'  | RC | 38 | 7.396  | -11.875 | -7.232  | 0.00 | 0.00 |
| ATOM | 1200 | H4'  | RC | 38 | 8.356  | -11.954 | -7.703  | 0.00 | 0.00 |
| ATOM | 1201 | O4'  | RC | 38 | 7.112  | -10.515 | -6.970  | 0.00 | 0.00 |
| ATOM | 1202 | C1'  | RC | 38 | 7.589  | -10.192 | -5.685  | 0.00 | 0.00 |
| ATOM | 1203 | H1'  | RC | 38 | 8.349  | -9.442  | -5.776  | 0.00 | 0.00 |
| ATOM | 1204 | N1   | RC | 38 | 6.521  | -9.689  | -4.784  | 0.00 | 0.00 |
| ATOM | 1205 | C6   | RC | 38 | 5.233  | -10.105 | -4.885  | 0.00 | 0.00 |
| ATOM | 1206 | H6   | RC | 38 | 4.971  | -10.756 | -5.676  | 0.00 | 0.00 |
| ATOM | 1207 | C5   | RC | 38 | 4.297  | -9.683  | -4.014  | 0.00 | 0.00 |
| ATOM | 1208 | H5   | RC | 38 | 3.288  | -9.998  | -4.108  | 0.00 | 0.00 |
| ATOM | 1209 | C4   | RC | 38 | 4.709  | -8.817  | -2.998  | 0.00 | 0.00 |
| ATOM | 1210 | N4   | RC | 38 | 3.859  | -8.378  | -2.137  | 0.00 | 0.00 |
| ATOM | 1211 | H41  | RC | 38 | 4.158  | -7.719  | -1.472  | 0.00 | 0.00 |
| ATOM | 1212 | H42  | RC | 38 | 2.916  | -8.626  | -2.220  | 0.00 | 0.00 |
| ATOM | 1213 | N3   | RC | 38 | 5.939  | -8.412  | -2.876  | 0.00 | 0.00 |
| ATOM | 1214 | C2   | RC | 38 | 6.865  | -8.837  | -3.753  | 0.00 | 0.00 |
| ATOM | 1215 | O2   | RC | 38 | 8.007  | -8.462  | -3.594  | 0.00 | 0.00 |
| ATOM | 1216 | C3'  | RC | 38 | 7.494  | -12.528 | -5.886  | 0.00 | 0.00 |
| ATOM | 1217 | H3'  | RC | 38 | 6.516  | -12.641 | -5.469  | 0.00 | 0.00 |

|      |      |      |    |    |        |         |        |      |      |
|------|------|------|----|----|--------|---------|--------|------|------|
| ATOM | 1218 | C2'  | RC | 38 | 8.209  | -11.450 | -5.120 | 0.00 | 0.00 |
| ATOM | 1219 | 1H2' | RC | 38 | 8.013  | -11.542 | -4.078 | 0.00 | 0.00 |
| ATOM | 1220 | O2'  | RC | 38 | 9.576  | -11.421 | -5.376 | 0.00 | 0.00 |
| ATOM | 1221 | 2HO' | RC | 38 | 9.919  | -11.489 | -4.965 | 0.00 | 0.00 |
| ATOM | 1222 | O3'  | RC | 38 | 8.166  | -13.767 | -5.905 | 0.00 | 0.00 |
| ATOM | 1223 | P    | RA | 39 | 7.924  | -14.836 | -4.779 | 0.00 | 0.00 |
| ATOM | 1224 | O1P  | RA | 39 | 8.683  | -16.024 | -5.130 | 0.00 | 0.00 |
| ATOM | 1225 | O2P  | RA | 39 | 6.494  | -14.959 | -4.550 | 0.00 | 0.00 |
| ATOM | 1226 | O5'  | RA | 39 | 8.546  | -14.214 | -3.481 | 0.00 | 0.00 |
| ATOM | 1227 | C5'  | RA | 39 | 9.929  | -14.139 | -3.293 | 0.00 | 0.00 |
| ATOM | 1228 | 1H5' | RA | 39 | 10.389 | -13.609 | -4.103 | 0.00 | 0.00 |
| ATOM | 1229 | 2H5' | RA | 39 | 10.340 | -15.122 | -3.270 | 0.00 | 0.00 |
| ATOM | 1230 | C4'  | RA | 39 | 10.264 | -13.434 | -1.992 | 0.00 | 0.00 |
| ATOM | 1231 | H4'  | RA | 39 | 11.332 | -13.403 | -1.894 | 0.00 | 0.00 |
| ATOM | 1232 | O4'  | RA | 39 | 9.766  | -12.121 | -1.962 | 0.00 | 0.00 |
| ATOM | 1233 | C1'  | RA | 39 | 9.379  | -11.789 | -0.649 | 0.00 | 0.00 |
| ATOM | 1234 | H1'  | RA | 39 | 9.915  | -10.936 | -0.298 | 0.00 | 0.00 |
| ATOM | 1235 | N9   | RA | 39 | 7.939  | -11.472 | -0.590 | 0.00 | 0.00 |
| ATOM | 1236 | C8   | RA | 39 | 6.918  | -11.933 | -1.361 | 0.00 | 0.00 |
| ATOM | 1237 | H8   | RA | 39 | 7.068  | -12.618 | -2.157 | 0.00 | 0.00 |
| ATOM | 1238 | N7   | RA | 39 | 5.759  | -11.463 | -1.048 | 0.00 | 0.00 |
| ATOM | 1239 | C5   | RA | 39 | 6.031  | -10.650 | 0.039  | 0.00 | 0.00 |
| ATOM | 1240 | C6   | RA | 39 | 5.280  | -9.842  | 0.902  | 0.00 | 0.00 |
| ATOM | 1241 | N6   | RA | 39 | 4.002  | -9.654  | 0.833  | 0.00 | 0.00 |
| ATOM | 1242 | H61  | RA | 39 | 3.589  | -9.035  | 1.475  | 0.00 | 0.00 |
| ATOM | 1243 | H62  | RA | 39 | 3.489  | -10.084 | 0.113  | 0.00 | 0.00 |
| ATOM | 1244 | N1   | RA | 39 | 5.837  | -9.200  | 1.896  | 0.00 | 0.00 |
| ATOM | 1245 | C2   | RA | 39 | 7.129  | -9.319  | 2.052  | 0.00 | 0.00 |
| ATOM | 1246 | H2   | RA | 39 | 7.554  | -8.805  | 2.875  | 0.00 | 0.00 |
| ATOM | 1247 | N3   | RA | 39 | 7.969  | -10.028 | 1.340  | 0.00 | 0.00 |
| ATOM | 1248 | C4   | RA | 39 | 7.351  | -10.669 | 0.329  | 0.00 | 0.00 |
| ATOM | 1249 | C3'  | RA | 39 | 9.706  | -14.119 | -0.763 | 0.00 | 0.00 |
| ATOM | 1250 | H3'  | RA | 39 | 8.698  | -14.425 | -0.939 | 0.00 | 0.00 |
| ATOM | 1251 | C2'  | RA | 39 | 9.712  | -12.979 | 0.226  | 0.00 | 0.00 |
| ATOM | 1252 | 1H2' | RA | 39 | 8.977  | -13.128 | 0.994  | 0.00 | 0.00 |
| ATOM | 1253 | O2'  | RA | 39 | 10.974 | -12.788 | 0.798  | 0.00 | 0.00 |
| ATOM | 1254 | 2HO' | RA | 39 | 11.390 | -13.537 | 0.862  | 0.00 | 0.00 |
| ATOM | 1255 | O3'  | RA | 39 | 10.498 | -15.183 | -0.324 | 0.00 | 0.00 |
| ATOM | 1256 | P    | RC | 40 | 9.854  | -16.484 | 0.225  | 0.00 | 0.00 |
| ATOM | 1257 | O1P  | RC | 40 | 10.928 | -17.361 | 0.633  | 0.00 | 0.00 |
| ATOM | 1258 | O2P  | RC | 40 | 8.908  | -16.949 | -0.765 | 0.00 | 0.00 |
| ATOM | 1259 | O5'  | RC | 40 | 9.048  | -16.052 | 1.501  | 0.00 | 0.00 |
| ATOM | 1260 | C5'  | RC | 40 | 9.675  | -15.779 | 2.716  | 0.00 | 0.00 |
| ATOM | 1261 | 1H5' | RC | 40 | 10.396 | -15.002 | 2.584  | 0.00 | 0.00 |
| ATOM | 1262 | 2H5' | RC | 40 | 10.175 | -16.652 | 3.064  | 0.00 | 0.00 |
| ATOM | 1263 | C4'  | RC | 40 | 8.696  | -15.354 | 3.793  | 0.00 | 0.00 |
| ATOM | 1264 | H4'  | RC | 40 | 9.231  | -15.278 | 4.719  | 0.00 | 0.00 |
| ATOM | 1265 | O4'  | RC | 40 | 8.102  | -14.114 | 3.499  | 0.00 | 0.00 |
| ATOM | 1266 | C1'  | RC | 40 | 6.900  | -14.026 | 4.238  | 0.00 | 0.00 |
| ATOM | 1267 | H1'  | RC | 40 | 7.040  | -13.363 | 5.074  | 0.00 | 0.00 |
| ATOM | 1268 | N1   | RC | 40 | 5.766  | -13.543 | 3.439  | 0.00 | 0.00 |
| ATOM | 1269 | C6   | RC | 40 | 5.645  | -13.849 | 2.123  | 0.00 | 0.00 |
| ATOM | 1270 | H6   | RC | 40 | 6.429  | -14.369 | 1.627  | 0.00 | 0.00 |
| ATOM | 1271 | C5   | RC | 40 | 4.537  | -13.509 | 1.464  | 0.00 | 0.00 |
| ATOM | 1272 | H5   | RC | 40 | 4.450  | -13.758 | 0.434  | 0.00 | 0.00 |
| ATOM | 1273 | C4   | RC | 40 | 3.536  | -12.832 | 2.168  | 0.00 | 0.00 |
| ATOM | 1274 | N4   | RC | 40 | 2.459  | -12.477 | 1.587  | 0.00 | 0.00 |
| ATOM | 1275 | H41  | RC | 40 | 1.767  | -12.024 | 2.127  | 0.00 | 0.00 |
| ATOM | 1276 | H42  | RC | 40 | 2.361  | -12.628 | 0.622  | 0.00 | 0.00 |
| ATOM | 1277 | N3   | RC | 40 | 3.625  | -12.529 | 3.434  | 0.00 | 0.00 |
| ATOM | 1278 | C2   | RC | 40 | 4.732  | -12.885 | 4.088  | 0.00 | 0.00 |
| ATOM | 1279 | O2   | RC | 40 | 4.778  | -12.621 | 5.276  | 0.00 | 0.00 |
| ATOM | 1280 | C3'  | RC | 40 | 7.537  | -16.296 | 4.005  | 0.00 | 0.00 |
| ATOM | 1281 | H3'  | RC | 40 | 7.090  | -16.506 | 3.054  | 0.00 | 0.00 |
| ATOM | 1282 | C2'  | RC | 40 | 6.604  | -15.406 | 4.784  | 0.00 | 0.00 |
| ATOM | 1283 | 1H2' | RC | 40 | 5.598  | -15.691 | 4.587  | 0.00 | 0.00 |
| ATOM | 1284 | O2'  | RC | 40 | 6.884  | -15.399 | 6.148  | 0.00 | 0.00 |
| ATOM | 1285 | 2HO' | RC | 40 | 6.897  | -16.218 | 6.427  | 0.00 | 0.00 |

|      |      |      |    |    |        |         |        |      |      |
|------|------|------|----|----|--------|---------|--------|------|------|
| ATOM | 1286 | O3'  | RC | 40 | 7.852  | -17.492 | 4.675  | 0.00 | 0.00 |
| ATOM | 1287 | P    | RG | 41 | 6.803  | -18.652 | 4.808  | 0.00 | 0.00 |
| ATOM | 1288 | O1P  | RG | 41 | 7.502  | -19.867 | 5.193  | 0.00 | 0.00 |
| ATOM | 1289 | O2P  | RG | 41 | 5.974  | -18.676 | 3.609  | 0.00 | 0.00 |
| ATOM | 1290 | O5'  | RG | 41 | 5.853  | -18.246 | 6.007  | 0.00 | 0.00 |
| ATOM | 1291 | C5'  | RG | 41 | 6.207  | -18.459 | 7.353  | 0.00 | 0.00 |
| ATOM | 1292 | 1H5' | RG | 41 | 7.095  | -17.902 | 7.589  | 0.00 | 0.00 |
| ATOM | 1293 | 2H5' | RG | 41 | 6.403  | -19.503 | 7.510  | 0.00 | 0.00 |
| ATOM | 1294 | C4'  | RG | 41 | 5.082  | -18.040 | 8.294  | 0.00 | 0.00 |
| ATOM | 1295 | H4'  | RG | 41 | 5.410  | -18.219 | 9.303  | 0.00 | 0.00 |
| ATOM | 1296 | O4'  | RG | 41 | 4.750  | -16.672 | 8.176  | 0.00 | 0.00 |
| ATOM | 1297 | C1'  | RG | 41 | 3.357  | -16.527 | 8.412  | 0.00 | 0.00 |
| ATOM | 1298 | H1'  | RG | 41 | 3.176  | -15.811 | 9.198  | 0.00 | 0.00 |
| ATOM | 1299 | N9   | RG | 41 | 2.667  | -16.072 | 7.194  | 0.00 | 0.00 |
| ATOM | 1300 | C8   | RG | 41 | 3.112  | -16.077 | 5.913  | 0.00 | 0.00 |
| ATOM | 1301 | H8   | RG | 41 | 4.079  | -16.437 | 5.663  | 0.00 | 0.00 |
| ATOM | 1302 | N7   | RG | 41 | 2.279  | -15.607 | 5.048  | 0.00 | 0.00 |
| ATOM | 1303 | C5   | RG | 41 | 1.169  | -15.285 | 5.812  | 0.00 | 0.00 |
| ATOM | 1304 | C6   | RG | 41 | -0.105 | -14.760 | 5.454  | 0.00 | 0.00 |
| ATOM | 1305 | O6   | RG | 41 | -0.526 | -14.413 | 4.362  | 0.00 | 0.00 |
| ATOM | 1306 | N1   | RG | 41 | -0.952 | -14.636 | 6.518  | 0.00 | 0.00 |
| ATOM | 1307 | H1   | RG | 41 | -1.859 | -14.292 | 6.326  | 0.00 | 0.00 |
| ATOM | 1308 | C2   | RG | 41 | -0.630 | -14.955 | 7.780  | 0.00 | 0.00 |
| ATOM | 1309 | N2   | RG | 41 | -1.534 | -14.818 | 8.675  | 0.00 | 0.00 |
| ATOM | 1310 | H21  | RG | 41 | -2.447 | -14.556 | 8.436  | 0.00 | 0.00 |
| ATOM | 1311 | H22  | RG | 41 | -1.312 | -15.085 | 9.590  | 0.00 | 0.00 |
| ATOM | 1312 | N3   | RG | 41 | 0.532  | -15.425 | 8.162  | 0.00 | 0.00 |
| ATOM | 1313 | C4   | RG | 41 | 1.399  | -15.580 | 7.127  | 0.00 | 0.00 |
| ATOM | 1314 | C3'  | RG | 41 | 3.781  | -18.804 | 8.089  | 0.00 | 0.00 |
| ATOM | 1315 | H3'  | RG | 41 | 3.534  | -18.807 | 7.042  | 0.00 | 0.00 |
| ATOM | 1316 | C2'  | RG | 41 | 2.827  | -17.885 | 8.827  | 0.00 | 0.00 |
| ATOM | 1317 | 1H2' | RG | 41 | 1.811  | -18.045 | 8.511  | 0.00 | 0.00 |
| ATOM | 1318 | O2'  | RG | 41 | 2.920  | -17.983 | 10.221 | 0.00 | 0.00 |
| ATOM | 1319 | 2HO' | RG | 41 | 2.618  | -18.187 | 10.575 | 0.00 | 0.00 |
| ATOM | 1320 | O3'  | RG | 41 | 3.794  | -20.114 | 8.613  | 0.00 | 0.00 |
| ATOM | 1321 | P    | RG | 42 | 2.854  | -21.225 | 8.033  | 0.00 | 0.00 |
| ATOM | 1322 | O1P  | RG | 42 | 3.084  | -22.437 | 8.805  | 0.00 | 0.00 |
| ATOM | 1323 | O2P  | RG | 42 | 3.067  | -21.272 | 6.590  | 0.00 | 0.00 |
| ATOM | 1324 | O5'  | RG | 42 | 1.385  | -20.734 | 8.300  | 0.00 | 0.00 |
| ATOM | 1325 | C5'  | RG | 42 | 0.820  | -20.747 | 9.591  | 0.00 | 0.00 |
| ATOM | 1326 | 1H5' | RG | 42 | 1.419  | -20.161 | 10.258 | 0.00 | 0.00 |
| ATOM | 1327 | 2H5' | RG | 42 | 0.790  | -21.750 | 9.957  | 0.00 | 0.00 |
| ATOM | 1328 | C4'  | RG | 42 | -0.587 | -20.194 | 9.605  | 0.00 | 0.00 |
| ATOM | 1329 | H4'  | RG | 42 | -0.947 | -20.226 | 10.620 | 0.00 | 0.00 |
| ATOM | 1330 | O4'  | RG | 42 | -0.650 | -18.863 | 9.140  | 0.00 | 0.00 |
| ATOM | 1331 | C1'  | RG | 42 | -1.855 | -18.680 | 8.439  | 0.00 | 0.00 |
| ATOM | 1332 | H1'  | RG | 42 | -2.423 | -17.870 | 8.864  | 0.00 | 0.00 |
| ATOM | 1333 | N9   | RG | 42 | -1.610 | -18.368 | 7.015  | 0.00 | 0.00 |
| ATOM | 1334 | C8   | RG | 42 | -0.499 | -18.586 | 6.258  | 0.00 | 0.00 |
| ATOM | 1335 | H8   | RG | 42 | 0.373  | -19.043 | 6.655  | 0.00 | 0.00 |
| ATOM | 1336 | N7   | RG | 42 | -0.597 | -18.177 | 5.033  | 0.00 | 0.00 |
| ATOM | 1337 | C5   | RG | 42 | -1.879 | -17.662 | 4.960  | 0.00 | 0.00 |
| ATOM | 1338 | C6   | RG | 42 | -2.603 | -17.073 | 3.877  | 0.00 | 0.00 |
| ATOM | 1339 | O6   | RG | 42 | -2.254 | -16.843 | 2.727  | 0.00 | 0.00 |
| ATOM | 1340 | N1   | RG | 42 | -3.889 | -16.749 | 4.211  | 0.00 | 0.00 |
| ATOM | 1341 | H1   | RG | 42 | -4.476 | -16.390 | 3.497  | 0.00 | 0.00 |
| ATOM | 1342 | C2   | RG | 42 | -4.418 | -16.939 | 5.430  | 0.00 | 0.00 |
| ATOM | 1343 | N2   | RG | 42 | -5.663 | -16.637 | 5.571  | 0.00 | 0.00 |
| ATOM | 1344 | H21  | RG | 42 | -6.183 | -16.316 | 4.788  | 0.00 | 0.00 |
| ATOM | 1345 | H22  | RG | 42 | -6.090 | -16.814 | 6.440  | 0.00 | 0.00 |
| ATOM | 1346 | N3   | RG | 42 | -3.779 | -17.442 | 6.468  | 0.00 | 0.00 |
| ATOM | 1347 | C4   | RG | 42 | -2.507 | -17.786 | 6.173  | 0.00 | 0.00 |
| ATOM | 1348 | C3'  | RG | 42 | -1.549 | -20.991 | 8.759  | 0.00 | 0.00 |
| ATOM | 1349 | H3'  | RG | 42 | -1.107 | -21.206 | 7.801  | 0.00 | 0.00 |
| ATOM | 1350 | C2'  | RG | 42 | -2.649 | -19.965 | 8.593  | 0.00 | 0.00 |
| ATOM | 1351 | 1H2' | RG | 42 | -3.252 | -20.171 | 7.730  | 0.00 | 0.00 |
| ATOM | 1352 | O2'  | RG | 42 | -3.451 | -19.847 | 9.743  | 0.00 | 0.00 |
| ATOM | 1353 | 2HO' | RG | 42 | -3.666 | -20.336 | 9.985  | 0.00 | 0.00 |

|      |      |      |    |    |         |         |        |      |      |
|------|------|------|----|----|---------|---------|--------|------|------|
| ATOM | 1354 | O3'  | RG | 42 | -1.984  | -22.158 | 9.408  | 0.00 | 0.00 |
| ATOM | 1355 | P    | RC | 43 | -2.484  | -23.387 | 8.596  | 0.00 | 0.00 |
| ATOM | 1356 | O1P  | RC | 43 | -2.791  | -24.435 | 9.552  | 0.00 | 0.00 |
| ATOM | 1357 | O2P  | RC | 43 | -1.519  | -23.649 | 7.548  | 0.00 | 0.00 |
| ATOM | 1358 | O5'  | RC | 43 | -3.825  | -22.945 | 7.929  | 0.00 | 0.00 |
| ATOM | 1359 | C5'  | RC | 43 | -5.006  | -22.803 | 8.666  | 0.00 | 0.00 |
| ATOM | 1360 | 1H5' | RC | 43 | -4.826  | -22.172 | 9.511  | 0.00 | 0.00 |
| ATOM | 1361 | 2H5' | RC | 43 | -5.321  | -23.758 | 9.033  | 0.00 | 0.00 |
| ATOM | 1362 | C4'  | RC | 43 | -6.117  | -22.214 | 7.837  | 0.00 | 0.00 |
| ATOM | 1363 | H4'  | RC | 43 | -6.986  | -22.123 | 8.463  | 0.00 | 0.00 |
| ATOM | 1364 | O4'  | RC | 43 | -5.802  | -20.933 | 7.341  | 0.00 | 0.00 |
| ATOM | 1365 | C1'  | RC | 43 | -6.477  | -20.736 | 6.109  | 0.00 | 0.00 |
| ATOM | 1366 | H1'  | RC | 43 | -7.155  | -19.906 | 6.201  | 0.00 | 0.00 |
| ATOM | 1367 | N1   | RC | 43 | -5.553  | -20.461 | 4.981  | 0.00 | 0.00 |
| ATOM | 1368 | C6   | RC | 43 | -4.273  | -20.899 | 4.972  | 0.00 | 0.00 |
| ATOM | 1369 | H6   | RC | 43 | -3.900  | -21.428 | 5.815  | 0.00 | 0.00 |
| ATOM | 1370 | C5   | RC | 43 | -3.489  | -20.696 | 3.895  | 0.00 | 0.00 |
| ATOM | 1371 | H5   | RC | 43 | -2.493  | -21.058 | 3.877  | 0.00 | 0.00 |
| ATOM | 1372 | C4   | RC | 43 | -4.050  | -20.011 | 2.806  | 0.00 | 0.00 |
| ATOM | 1373 | N4   | RC | 43 | -3.351  | -19.777 | 1.750  | 0.00 | 0.00 |
| ATOM | 1374 | H41  | RC | 43 | -3.757  | -19.246 | 1.025  | 0.00 | 0.00 |
| ATOM | 1375 | H42  | RC | 43 | -2.415  | -20.073 | 1.724  | 0.00 | 0.00 |
| ATOM | 1376 | N3   | RC | 43 | -5.268  | -19.565 | 2.796  | 0.00 | 0.00 |
| ATOM | 1377 | C2   | RC | 43 | -6.044  | -19.787 | 3.875  | 0.00 | 0.00 |
| ATOM | 1378 | O2   | RC | 43 | -7.193  | -19.404 | 3.835  | 0.00 | 0.00 |
| ATOM | 1379 | C3'  | RC | 43 | -6.519  | -23.038 | 6.638  | 0.00 | 0.00 |
| ATOM | 1380 | H3'  | RC | 43 | -5.637  | -23.304 | 6.086  | 0.00 | 0.00 |
| ATOM | 1381 | C2'  | RC | 43 | -7.292  | -21.996 | 5.853  | 0.00 | 0.00 |
| ATOM | 1382 | 1H2' | RC | 43 | -7.320  | -22.240 | 4.808  | 0.00 | 0.00 |
| ATOM | 1383 | O2'  | RC | 43 | -8.588  | -21.805 | 6.361  | 0.00 | 0.00 |
| ATOM | 1384 | 2HO' | RC | 43 | -8.907  | -22.460 | 6.538  | 0.00 | 0.00 |
| ATOM | 1385 | O3'  | RC | 43 | -7.286  | -24.163 | 6.972  | 0.00 | 0.00 |
| ATOM | 1386 | P    | RA | 44 | -7.384  | -25.384 | 5.995  | 0.00 | 0.00 |
| ATOM | 1387 | O1P  | RA | 44 | -8.150  | -26.421 | 6.656  | 0.00 | 0.00 |
| ATOM | 1388 | O2P  | RA | 44 | -6.056  | -25.708 | 5.526  | 0.00 | 0.00 |
| ATOM | 1389 | O5'  | RA | 44 | -8.202  | -24.861 | 4.762  | 0.00 | 0.00 |
| ATOM | 1390 | C5'  | RA | 44 | -9.585  | -24.705 | 4.807  | 0.00 | 0.00 |
| ATOM | 1391 | 1H5' | RA | 44 | -9.850  | -24.082 | 5.632  | 0.00 | 0.00 |
| ATOM | 1392 | 2H5' | RA | 44 | -10.042 | -25.656 | 4.950  | 0.00 | 0.00 |
| ATOM | 1393 | C4'  | RA | 44 | -10.140 | -24.100 | 3.532  | 0.00 | 0.00 |
| ATOM | 1394 | H4'  | RA | 44 | -11.198 | -23.981 | 3.659  | 0.00 | 0.00 |
| ATOM | 1395 | O4'  | RA | 44 | -9.585  | -22.837 | 3.238  | 0.00 | 0.00 |
| ATOM | 1396 | C1'  | RA | 44 | -9.497  | -22.688 | 1.833  | 0.00 | 0.00 |
| ATOM | 1397 | H1'  | RA | 44 | -10.014 | -21.805 | 1.508  | 0.00 | 0.00 |
| ATOM | 1398 | N9   | RA | 44 | -8.091  | -22.587 | 1.405  | 0.00 | 0.00 |
| ATOM | 1399 | C8   | RA | 44 | -6.967  | -23.007 | 2.052  | 0.00 | 0.00 |
| ATOM | 1400 | H8   | RA | 44 | -7.004  | -23.529 | 2.982  | 0.00 | 0.00 |
| ATOM | 1401 | N7   | RA | 44 | -5.861  | -22.715 | 1.448  | 0.00 | 0.00 |
| ATOM | 1402 | C5   | RA | 44 | -6.297  | -22.086 | 0.287  | 0.00 | 0.00 |
| ATOM | 1403 | C6   | RA | 44 | -5.670  | -21.519 | -0.831 | 0.00 | 0.00 |
| ATOM | 1404 | N6   | RA | 44 | -4.379  | -21.410 | -0.990 | 0.00 | 0.00 |
| ATOM | 1405 | H61  | RA | 44 | -4.050  | -20.950 | -1.800 | 0.00 | 0.00 |
| ATOM | 1406 | H62  | RA | 44 | -3.782  | -21.710 | -0.270 | 0.00 | 0.00 |
| ATOM | 1407 | N1   | RA | 44 | -6.363  | -21.024 | -1.838 | 0.00 | 0.00 |
| ATOM | 1408 | C2   | RA | 44 | -7.674  | -21.063 | -1.751 | 0.00 | 0.00 |
| ATOM | 1409 | H2   | RA | 44 | -8.207  | -20.655 | -2.575 | 0.00 | 0.00 |
| ATOM | 1410 | N3   | RA | 44 | -8.409  | -21.544 | -0.763 | 0.00 | 0.00 |
| ATOM | 1411 | C4   | RA | 44 | -7.649  | -22.035 | 0.236  | 0.00 | 0.00 |
| ATOM | 1412 | C3'  | RA | 44 | -9.923  | -24.950 | 2.298  | 0.00 | 0.00 |
| ATOM | 1413 | H3'  | RA | 44 | -8.901  | -25.272 | 2.272  | 0.00 | 0.00 |
| ATOM | 1414 | C2'  | RA | 44 | -10.155 | -23.905 | 1.222  | 0.00 | 0.00 |
| ATOM | 1415 | 1H2' | RA | 44 | -9.678  | -24.192 | 0.303  | 0.00 | 0.00 |
| ATOM | 1416 | O2'  | RA | 44 | -11.514 | -23.616 | 1.008  | 0.00 | 0.00 |
| ATOM | 1417 | 2HO' | RA | 44 | -11.831 | -23.878 | 0.802  | 0.00 | 0.00 |
| ATOM | 1418 | O3'  | RA | 44 | -10.795 | -26.039 | 2.196  | 0.00 | 0.00 |
| ATOM | 1419 | P    | RA | 45 | -10.433 | -27.293 | 1.332  | 0.00 | 0.00 |
| ATOM | 1420 | O1P  | RA | 45 | -11.506 | -28.255 | 1.507  | 0.00 | 0.00 |
| ATOM | 1421 | O2P  | RA | 45 | -9.082  | -27.695 | 1.652  | 0.00 | 0.00 |

|      |      |      |     |    |         |         |         |      |      |
|------|------|------|-----|----|---------|---------|---------|------|------|
| ATOM | 1422 | O5'  | RA  | 45 | -10.435 | -26.801 | -0.154  | 0.00 | 0.00 |
| ATOM | 1423 | C5'  | RA  | 45 | -11.633 | -26.544 | -0.829  | 0.00 | 0.00 |
| ATOM | 1424 | 1H5' | RA  | 45 | -12.239 | -25.895 | -0.238  | 0.00 | 0.00 |
| ATOM | 1425 | 2H5' | RA  | 45 | -12.163 | -27.455 | -0.965  | 0.00 | 0.00 |
| ATOM | 1426 | C4'  | RA  | 45 | -11.404 | -25.913 | -2.186  | 0.00 | 0.00 |
| ATOM | 1427 | H4'  | RA  | 45 | -12.362 | -25.717 | -2.625  | 0.00 | 0.00 |
| ATOM | 1428 | O4'  | RA  | 45 | -10.696 | -24.698 | -2.088  | 0.00 | 0.00 |
| ATOM | 1429 | C1'  | RA  | 45 | -9.885  | -24.553 | -3.238  | 0.00 | 0.00 |
| ATOM | 1430 | H1'  | RA  | 45 | -10.094 | -23.629 | -3.741  | 0.00 | 0.00 |
| ATOM | 1431 | N9   | RA  | 45 | -8.466  | -24.566 | -2.869  | 0.00 | 0.00 |
| ATOM | 1432 | C8   | RA  | 45 | -7.862  | -25.097 | -1.769  | 0.00 | 0.00 |
| ATOM | 1433 | H8   | RA  | 45 | -8.405  | -25.587 | -0.993  | 0.00 | 0.00 |
| ATOM | 1434 | N7   | RA  | 45 | -6.573  | -24.972 | -1.759  | 0.00 | 0.00 |
| ATOM | 1435 | C5   | RA  | 45 | -6.308  | -24.300 | -2.946  | 0.00 | 0.00 |
| ATOM | 1436 | C6   | RA  | 45 | -5.156  | -23.815 | -3.594  | 0.00 | 0.00 |
| ATOM | 1437 | N6   | RA  | 45 | -3.949  | -23.884 | -3.110  | 0.00 | 0.00 |
| ATOM | 1438 | H61  | RA  | 45 | -3.207  | -23.474 | -3.627  | 0.00 | 0.00 |
| ATOM | 1439 | H62  | RA  | 45 | -3.824  | -24.269 | -2.216  | 0.00 | 0.00 |
| ATOM | 1440 | N1   | RA  | 45 | -5.228  | -23.236 | -4.775  | 0.00 | 0.00 |
| ATOM | 1441 | C2   | RA  | 45 | -6.406  | -23.119 | -5.328  | 0.00 | 0.00 |
| ATOM | 1442 | H2   | RA  | 45 | -6.434  | -22.639 | -6.277  | 0.00 | 0.00 |
| ATOM | 1443 | N3   | RA  | 45 | -7.574  | -23.503 | -4.854  | 0.00 | 0.00 |
| ATOM | 1444 | C4   | RA  | 45 | -7.455  | -24.081 | -3.639  | 0.00 | 0.00 |
| ATOM | 1445 | C3'  | RA  | 45 | -10.631 | -26.768 | -3.159  | 0.00 | 0.00 |
| ATOM | 1446 | H3'  | RA  | 45 | -9.759  | -27.159 | -2.670  | 0.00 | 0.00 |
| ATOM | 1447 | C2'  | RA  | 45 | -10.203 | -25.711 | -4.159  | 0.00 | 0.00 |
| ATOM | 1448 | 1H2' | RA  | 45 | -9.346  | -26.031 | -4.721  | 0.00 | 0.00 |
| ATOM | 1449 | O2'  | RA  | 45 | -11.241 | -25.324 | -5.016  | 0.00 | 0.00 |
| ATOM | 1450 | 2HO' | RA  | 45 | -11.693 | -25.937 | -5.236  | 0.00 | 0.00 |
| ATOM | 1451 | O3'  | RA  | 45 | -11.385 | -27.789 | -3.740  | 0.00 | 0.00 |
| ATOM | 1452 | P    | RG3 | 46 | -10.687 | -29.060 | -4.331  | 0.00 | 0.00 |
| ATOM | 1453 | O1P  | RG3 | 46 | -11.738 | -29.953 | -4.796  | 0.00 | 0.00 |
| ATOM | 1454 | O2P  | RG3 | 46 | -9.741  | -29.562 | -3.354  | 0.00 | 0.00 |
| ATOM | 1455 | O5'  | RG3 | 46 | -9.861  | -28.559 | -5.569  | 0.00 | 0.00 |
| ATOM | 1456 | C5'  | RG3 | 46 | -10.473 | -28.222 | -6.782  | 0.00 | 0.00 |
| ATOM | 1457 | 1H5' | RG3 | 46 | -11.208 | -27.478 | -6.615  | 0.00 | 0.00 |
| ATOM | 1458 | 2H5' | RG3 | 46 | -10.960 | -29.077 | -7.186  | 0.00 | 0.00 |
| ATOM | 1459 | C4'  | RG3 | 46 | -9.495  | -27.688 | -7.805  | 0.00 | 0.00 |
| ATOM | 1460 | H4'  | RG3 | 46 | -10.048 | -27.448 | -8.689  | 0.00 | 0.00 |
| ATOM | 1461 | O4'  | RG3 | 46 | -8.829  | -26.529 | -7.372  | 0.00 | 0.00 |
| ATOM | 1462 | C1'  | RG3 | 46 | -7.518  | -26.542 | -7.881  | 0.00 | 0.00 |
| ATOM | 1463 | H1'  | RG3 | 46 | -7.338  | -25.669 | -8.471  | 0.00 | 0.00 |
| ATOM | 1464 | N9   | RG3 | 46 | -6.530  | -26.581 | -6.803  | 0.00 | 0.00 |
| ATOM | 1465 | C8   | RG3 | 46 | -6.637  | -27.100 | -5.549  | 0.00 | 0.00 |
| ATOM | 1466 | H8   | RG3 | 46 | -7.558  | -27.483 | -5.176  | 0.00 | 0.00 |
| ATOM | 1467 | N7   | RG3 | 46 | -5.547  | -27.062 | -4.862  | 0.00 | 0.00 |
| ATOM | 1468 | C5   | RG3 | 46 | -4.631  | -26.490 | -5.738  | 0.00 | 0.00 |
| ATOM | 1469 | C6   | RG3 | 46 | -3.238  | -26.211 | -5.607  | 0.00 | 0.00 |
| ATOM | 1470 | O6   | RG3 | 46 | -2.496  | -26.404 | -4.662  | 0.00 | 0.00 |
| ATOM | 1471 | N1   | RG3 | 46 | -2.678  | -25.655 | -6.724  | 0.00 | 0.00 |
| ATOM | 1472 | H1   | RG3 | 46 | -1.706  | -25.444 | -6.700  | 0.00 | 0.00 |
| ATOM | 1473 | C2   | RG3 | 46 | -3.362  | -25.403 | -7.843  | 0.00 | 0.00 |
| ATOM | 1474 | N2   | RG3 | 46 | -2.701  | -24.900 | -8.831  | 0.00 | 0.00 |
| ATOM | 1475 | H21  | RG3 | 46 | -1.723  | -24.787 | -8.785  | 0.00 | 0.00 |
| ATOM | 1476 | H22  | RG3 | 46 | -3.192  | -24.698 | -9.666  | 0.00 | 0.00 |
| ATOM | 1477 | N3   | RG3 | 46 | -4.647  | -25.634 | -8.010  | 0.00 | 0.00 |
| ATOM | 1478 | C4   | RG3 | 46 | -5.231  | -26.187 | -6.919  | 0.00 | 0.00 |
| ATOM | 1479 | C3'  | RG3 | 46 | -8.432  | -28.664 | -8.204  | 0.00 | 0.00 |
| ATOM | 1480 | H3'  | RG3 | 46 | -8.040  | -29.143 | -7.344  | 0.00 | 0.00 |
| ATOM | 1481 | C2'  | RG3 | 46 | -7.384  | -27.755 | -8.766  | 0.00 | 0.00 |
| ATOM | 1482 | 1H2' | RG3 | 46 | -6.417  | -28.198 | -8.689  | 0.00 | 0.00 |
| ATOM | 1483 | O2'  | RG3 | 46 | -7.636  | -27.395 | -10.089 | 0.00 | 0.00 |
| ATOM | 1484 | 2HO' | RG3 | 46 | -7.489  | -27.676 | -10.524 | 0.00 | 0.00 |
| ATOM | 1485 | O3'  | RG3 | 46 | -8.858  | -29.568 | -9.150  | 0.00 | 0.00 |
| ATOM | 1486 | H3T  | RG3 | 46 | -8.845  | -29.972 | -9.146  | 0.00 | 0.00 |

# 3R-bulged-out conformation - 3R\_bulged\_out\_c.pdb

REMARK MD average structure 26700 - 26800 ps

REMARK 1XPF (PDB database)

REMARK sequence chain I. residues 1-23 5'(CUUGCUGAGGUGCACACAGCAAG)3'

REMARK sequence chain II. residues 24-46 5'(CUUGCUGAGGUGCACACAGCAAG)3'

REMARK PDB format: output from Ptraj module of AMBER-8.0

|      |    |      |     |   |         |        |         |      |      |
|------|----|------|-----|---|---------|--------|---------|------|------|
| ATOM | 1  | H5T  | RC5 | 1 | -12.002 | 24.760 | -4.840  | 0.00 | 0.00 |
| ATOM | 2  | O5'  | RC5 | 1 | -11.617 | 25.065 | -4.972  | 0.00 | 0.00 |
| ATOM | 3  | C5'  | RC5 | 1 | -10.368 | 24.541 | -5.091  | 0.00 | 0.00 |
| ATOM | 4  | 1H5' | RC5 | 1 | -10.356 | 23.863 | -5.873  | 0.00 | 0.00 |
| ATOM | 5  | 2H5' | RC5 | 1 | -10.136 | 24.034 | -4.225  | 0.00 | 0.00 |
| ATOM | 6  | C4'  | RC5 | 1 | -9.372  | 25.599 | -5.341  | 0.00 | 0.00 |
| ATOM | 7  | H4'  | RC5 | 1 | -9.690  | 26.171 | -6.167  | 0.00 | 0.00 |
| ATOM | 8  | O4'  | RC5 | 1 | -9.212  | 26.404 | -4.235  | 0.00 | 0.00 |
| ATOM | 9  | C1'  | RC5 | 1 | -7.922  | 26.926 | -4.237  | 0.00 | 0.00 |
| ATOM | 10 | H1'  | RC5 | 1 | -7.991  | 27.960 | -4.464  | 0.00 | 0.00 |
| ATOM | 11 | N1   | RC5 | 1 | -7.249  | 26.775 | -2.932  | 0.00 | 0.00 |
| ATOM | 12 | C6   | RC5 | 1 | -7.568  | 25.827 | -2.070  | 0.00 | 0.00 |
| ATOM | 13 | H6   | RC5 | 1 | -8.327  | 25.159 | -2.329  | 0.00 | 0.00 |
| ATOM | 14 | C5   | RC5 | 1 | -6.945  | 25.765 | -0.891  | 0.00 | 0.00 |
| ATOM | 15 | H5   | RC5 | 1 | -7.202  | 25.034 | -0.212  | 0.00 | 0.00 |
| ATOM | 16 | C4   | RC5 | 1 | -5.971  | 26.690 | -0.599  | 0.00 | 0.00 |
| ATOM | 17 | N4   | RC5 | 1 | -5.364  | 26.695 | 0.525   | 0.00 | 0.00 |
| ATOM | 18 | H41  | RC5 | 1 | -4.697  | 27.375 | 0.705   | 0.00 | 0.00 |
| ATOM | 19 | H42  | RC5 | 1 | -5.574  | 26.025 | 1.174   | 0.00 | 0.00 |
| ATOM | 20 | N3   | RC5 | 1 | -5.639  | 27.594 | -1.421  | 0.00 | 0.00 |
| ATOM | 21 | C2   | RC5 | 1 | -6.258  | 27.645 | -2.598  | 0.00 | 0.00 |
| ATOM | 22 | O2   | RC5 | 1 | -5.903  | 28.476 | -3.368  | 0.00 | 0.00 |
| ATOM | 23 | C3'  | RC5 | 1 | -8.012  | 25.051 | -5.625  | 0.00 | 0.00 |
| ATOM | 24 | H3'  | RC5 | 1 | -7.799  | 24.292 | -4.935  | 0.00 | 0.00 |
| ATOM | 25 | C2'  | RC5 | 1 | -7.174  | 26.229 | -5.331  | 0.00 | 0.00 |
| ATOM | 26 | 1H2' | RC5 | 1 | -6.214  | 25.933 | -5.017  | 0.00 | 0.00 |
| ATOM | 27 | O2'  | RC5 | 1 | -7.113  | 27.073 | -6.397  | 0.00 | 0.00 |
| ATOM | 28 | 2HO' | RC5 | 1 | -6.870  | 26.820 | -6.935  | 0.00 | 0.00 |
| ATOM | 29 | O3'  | RC5 | 1 | -7.888  | 24.579 | -6.916  | 0.00 | 0.00 |
| ATOM | 30 | P    | RU  | 2 | -6.767  | 23.558 | -7.293  | 0.00 | 0.00 |
| ATOM | 31 | O1P  | RU  | 2 | -7.005  | 23.141 | -8.656  | 0.00 | 0.00 |
| ATOM | 32 | O2P  | RU  | 2 | -6.715  | 22.558 | -6.259  | 0.00 | 0.00 |
| ATOM | 33 | O5'  | RU  | 2 | -5.432  | 24.365 | -7.232  | 0.00 | 0.00 |
| ATOM | 34 | C5'  | RU  | 2 | -5.031  | 25.207 | -8.264  | 0.00 | 0.00 |
| ATOM | 35 | 1H5' | RU  | 2 | -5.777  | 25.955 | -8.426  | 0.00 | 0.00 |
| ATOM | 36 | 2H5' | RU  | 2 | -4.921  | 24.660 | -9.173  | 0.00 | 0.00 |
| ATOM | 37 | C4'  | RU  | 2 | -3.699  | 25.857 | -7.956  | 0.00 | 0.00 |
| ATOM | 38 | H4'  | RU  | 2 | -3.413  | 26.463 | -8.792  | 0.00 | 0.00 |
| ATOM | 39 | O4'  | RU  | 2 | -3.753  | 26.679 | -6.815  | 0.00 | 0.00 |
| ATOM | 40 | C1'  | RU  | 2 | -2.489  | 26.672 | -6.166  | 0.00 | 0.00 |
| ATOM | 41 | H1'  | RU  | 2 | -2.061  | 27.656 | -6.203  | 0.00 | 0.00 |
| ATOM | 42 | N1   | RU  | 2 | -2.582  | 26.258 | -4.750  | 0.00 | 0.00 |
| ATOM | 43 | C6   | RU  | 2 | -3.546  | 25.414 | -4.311  | 0.00 | 0.00 |
| ATOM | 44 | H6   | RU  | 2 | -4.216  | 24.988 | -5.015  | 0.00 | 0.00 |
| ATOM | 45 | C5   | RU  | 2 | -3.656  | 25.118 | -3.002  | 0.00 | 0.00 |
| ATOM | 46 | H5   | RU  | 2 | -4.421  | 24.467 | -2.667  | 0.00 | 0.00 |
| ATOM | 47 | C4   | RU  | 2 | -2.772  | 25.659 | -2.032  | 0.00 | 0.00 |
| ATOM | 48 | O4   | RU  | 2 | -2.812  | 25.437 | -0.844  | 0.00 | 0.00 |
| ATOM | 49 | N3   | RU  | 2 | -1.804  | 26.445 | -2.548  | 0.00 | 0.00 |
| ATOM | 50 | H3   | RU  | 2 | -1.161  | 26.830 | -1.904  | 0.00 | 0.00 |
| ATOM | 51 | C2   | RU  | 2 | -1.642  | 26.747 | -3.865  | 0.00 | 0.00 |
| ATOM | 52 | O2   | RU  | 2 | -0.691  | 27.406 | -4.196  | 0.00 | 0.00 |
| ATOM | 53 | C3'  | RU  | 2 | -2.572  | 24.873 | -7.704  | 0.00 | 0.00 |
| ATOM | 54 | H3'  | RU  | 2 | -2.933  | 24.093 | -7.061  | 0.00 | 0.00 |
| ATOM | 55 | C2'  | RU  | 2 | -1.591  | 25.747 | -6.949  | 0.00 | 0.00 |
| ATOM | 56 | 1H2' | RU  | 2 | -0.983  | 25.152 | -6.297  | 0.00 | 0.00 |
| ATOM | 57 | O2'  | RU  | 2 | -0.786  | 26.496 | -7.821  | 0.00 | 0.00 |
| ATOM | 58 | 2HO' | RU  | 2 | -0.405  | 25.923 | -8.329  | 0.00 | 0.00 |
| ATOM | 59 | O3'  | RU  | 2 | -2.043  | 24.337 | -8.890  | 0.00 | 0.00 |
| ATOM | 60 | P    | RU  | 3 | -1.092  | 23.099 | -8.875  | 0.00 | 0.00 |
| ATOM | 61 | O1P  | RU  | 3 | -0.791  | 22.754 | -10.239 | 0.00 | 0.00 |



|      |     |      |    |   |        |        |        |      |      |
|------|-----|------|----|---|--------|--------|--------|------|------|
| ATOM | 62  | O2P  | RU | 3 | -1.654 | 22.114 | -8.001 | 0.00 | 0.00 |
| ATOM | 63  | O5'  | RU | 3 | 0.210  | 23.677 | -8.247 | 0.00 | 0.00 |
| ATOM | 64  | C5'  | RU | 3 | 1.032  | 22.925 | -7.453 | 0.00 | 0.00 |
| ATOM | 65  | 1H5' | RU | 3 | 1.531  | 22.208 | -8.052 | 0.00 | 0.00 |
| ATOM | 66  | 2H5' | RU | 3 | 0.467  | 22.434 | -6.713 | 0.00 | 0.00 |
| ATOM | 67  | C4'  | RU | 3 | 2.042  | 23.802 | -6.766 | 0.00 | 0.00 |
| ATOM | 68  | H4'  | RU | 3 | 2.616  | 24.339 | -7.488 | 0.00 | 0.00 |
| ATOM | 69  | O4'  | RU | 3 | 1.419  | 24.714 | -5.896 | 0.00 | 0.00 |
| ATOM | 70  | C1'  | RU | 3 | 2.172  | 24.827 | -4.704 | 0.00 | 0.00 |
| ATOM | 71  | H1'  | RU | 3 | 2.408  | 25.856 | -4.521 | 0.00 | 0.00 |
| ATOM | 72  | N1   | RU | 3 | 1.428  | 24.315 | -3.520 | 0.00 | 0.00 |
| ATOM | 73  | C6   | RU | 3 | 0.310  | 23.544 | -3.650 | 0.00 | 0.00 |
| ATOM | 74  | H6   | RU | 3 | -0.021 | 23.264 | -4.620 | 0.00 | 0.00 |
| ATOM | 75  | C5   | RU | 3 | -0.402 | 23.156 | -2.563 | 0.00 | 0.00 |
| ATOM | 76  | H5   | RU | 3 | -1.284 | 22.572 | -2.675 | 0.00 | 0.00 |
| ATOM | 77  | C4   | RU | 3 | -0.019 | 23.514 | -1.237 | 0.00 | 0.00 |
| ATOM | 78  | O4   | RU | 3 | -0.614 | 23.217 | -0.217 | 0.00 | 0.00 |
| ATOM | 79  | N3   | RU | 3 | 1.103  | 24.269 | -1.187 | 0.00 | 0.00 |
| ATOM | 80  | H3   | RU | 3 | 1.415  | 24.530 | -0.283 | 0.00 | 0.00 |
| ATOM | 81  | C2   | RU | 3 | 1.848  | 24.694 | -2.253 | 0.00 | 0.00 |
| ATOM | 82  | O2   | RU | 3 | 2.835  | 25.364 | -2.051 | 0.00 | 0.00 |
| ATOM | 83  | C3'  | RU | 3 | 2.997  | 23.010 | -5.926 | 0.00 | 0.00 |
| ATOM | 84  | H3'  | RU | 3 | 2.437  | 22.264 | -5.404 | 0.00 | 0.00 |
| ATOM | 85  | C2'  | RU | 3 | 3.455  | 24.060 | -4.954 | 0.00 | 0.00 |
| ATOM | 86  | 1H2' | RU | 3 | 3.819  | 23.609 | -4.060 | 0.00 | 0.00 |
| ATOM | 87  | O2'  | RU | 3 | 4.413  | 24.910 | -5.516 | 0.00 | 0.00 |
| ATOM | 88  | 2HO' | RU | 3 | 4.836  | 24.907 | -5.580 | 0.00 | 0.00 |
| ATOM | 89  | O3'  | RU | 3 | 4.031  | 22.433 | -6.676 | 0.00 | 0.00 |
| ATOM | 90  | P    | RG | 4 | 4.716  | 21.123 | -6.232 | 0.00 | 0.00 |
| ATOM | 91  | O1P  | RG | 4 | 5.695  | 20.796 | -7.251 | 0.00 | 0.00 |
| ATOM | 92  | O2P  | RG | 4 | 3.692  | 20.156 | -5.910 | 0.00 | 0.00 |
| ATOM | 93  | O5'  | RG | 4 | 5.451  | 21.458 | -4.902 | 0.00 | 0.00 |
| ATOM | 94  | C5'  | RG | 4 | 6.653  | 22.178 | -4.904 | 0.00 | 0.00 |
| ATOM | 95  | 1H5' | RG | 4 | 6.531  | 23.095 | -5.437 | 0.00 | 0.00 |
| ATOM | 96  | 2H5' | RG | 4 | 7.413  | 21.611 | -5.389 | 0.00 | 0.00 |
| ATOM | 97  | C4'  | RG | 4 | 7.136  | 22.488 | -3.502 | 0.00 | 0.00 |
| ATOM | 98  | H4'  | RG | 4 | 8.060  | 23.034 | -3.585 | 0.00 | 0.00 |
| ATOM | 99  | O4'  | RG | 4 | 6.206  | 23.275 | -2.798 | 0.00 | 0.00 |
| ATOM | 100 | C1'  | RG | 4 | 6.245  | 22.923 | -1.429 | 0.00 | 0.00 |
| ATOM | 101 | H1'  | RG | 4 | 6.454  | 23.786 | -0.828 | 0.00 | 0.00 |
| ATOM | 102 | N9   | RG | 4 | 4.960  | 22.355 | -0.990 | 0.00 | 0.00 |
| ATOM | 103 | C8   | RG | 4 | 3.946  | 21.844 | -1.737 | 0.00 | 0.00 |
| ATOM | 104 | H8   | RG | 4 | 3.991  | 21.780 | -2.803 | 0.00 | 0.00 |
| ATOM | 105 | N7   | RG | 4 | 2.916  | 21.470 | -1.053 | 0.00 | 0.00 |
| ATOM | 106 | C5   | RG | 4 | 3.284  | 21.717 | 0.264  | 0.00 | 0.00 |
| ATOM | 107 | C6   | RG | 4 | 2.593  | 21.520 | 1.500  | 0.00 | 0.00 |
| ATOM | 108 | O6   | RG | 4 | 1.464  | 21.111 | 1.697  | 0.00 | 0.00 |
| ATOM | 109 | N1   | RG | 4 | 3.356  | 21.826 | 2.600  | 0.00 | 0.00 |
| ATOM | 110 | H1   | RG | 4 | 2.952  | 21.682 | 3.499  | 0.00 | 0.00 |
| ATOM | 111 | C2   | RG | 4 | 4.602  | 22.304 | 2.536  | 0.00 | 0.00 |
| ATOM | 112 | N2   | RG | 4 | 5.198  | 22.527 | 3.661  | 0.00 | 0.00 |
| ATOM | 113 | H21  | RG | 4 | 4.733  | 22.308 | 4.503  | 0.00 | 0.00 |
| ATOM | 114 | H22  | RG | 4 | 6.111  | 22.893 | 3.642  | 0.00 | 0.00 |
| ATOM | 115 | N3   | RG | 4 | 5.262  | 22.552 | 1.420  | 0.00 | 0.00 |
| ATOM | 116 | C4   | RG | 4 | 4.552  | 22.229 | 0.308  | 0.00 | 0.00 |
| ATOM | 117 | C3'  | RG | 4 | 7.378  | 21.262 | -2.639 | 0.00 | 0.00 |
| ATOM | 118 | H3'  | RG | 4 | 6.538  | 20.592 | -2.727 | 0.00 | 0.00 |
| ATOM | 119 | C2'  | RG | 4 | 7.354  | 21.908 | -1.267 | 0.00 | 0.00 |
| ATOM | 120 | 1H2' | RG | 4 | 7.127  | 21.195 | -0.495 | 0.00 | 0.00 |
| ATOM | 121 | O2'  | RG | 4 | 8.546  | 22.585 | -0.973 | 0.00 | 0.00 |
| ATOM | 122 | 2HO' | RG | 4 | 9.071  | 22.250 | -1.078 | 0.00 | 0.00 |
| ATOM | 123 | O3'  | RG | 4 | 8.587  | 20.607 | -2.919 | 0.00 | 0.00 |
| ATOM | 124 | P    | RC | 5 | 8.773  | 19.078 | -2.616 | 0.00 | 0.00 |
| ATOM | 125 | O1P  | RC | 5 | 10.106 | 18.704 | -3.052 | 0.00 | 0.00 |
| ATOM | 126 | O2P  | RC | 5 | 7.638  | 18.365 | -3.171 | 0.00 | 0.00 |
| ATOM | 127 | O5'  | RC | 5 | 8.702  | 18.931 | -1.062 | 0.00 | 0.00 |
| ATOM | 128 | C5'  | RC | 5 | 9.760  | 19.332 | -0.242 | 0.00 | 0.00 |
| ATOM | 129 | 1H5' | RC | 5 | 10.058 | 20.327 | -0.489 | 0.00 | 0.00 |

|      |     |      |    |   |        |        |        |      |      |
|------|-----|------|----|---|--------|--------|--------|------|------|
| ATOM | 130 | 2H5' | RC | 5 | 10.593 | 18.688 | -0.402 | 0.00 | 0.00 |
| ATOM | 131 | C4'  | RC | 5 | 9.391  | 19.302 | 1.232  | 0.00 | 0.00 |
| ATOM | 132 | H4'  | RC | 5 | 10.218 | 19.703 | 1.785  | 0.00 | 0.00 |
| ATOM | 133 | O4'  | RC | 5 | 8.255  | 20.097 | 1.492  | 0.00 | 0.00 |
| ATOM | 134 | C1'  | RC | 5 | 7.545  | 19.529 | 2.574  | 0.00 | 0.00 |
| ATOM | 135 | H1'  | RC | 5 | 7.474  | 20.241 | 3.376  | 0.00 | 0.00 |
| ATOM | 136 | N1   | RC | 5 | 6.180  | 19.094 | 2.199  | 0.00 | 0.00 |
| ATOM | 137 | C6   | RC | 5 | 5.807  | 18.883 | 0.910  | 0.00 | 0.00 |
| ATOM | 138 | H6   | RC | 5 | 6.504  | 19.022 | 0.123  | 0.00 | 0.00 |
| ATOM | 139 | C5   | RC | 5 | 4.548  | 18.505 | 0.624  | 0.00 | 0.00 |
| ATOM | 140 | H5   | RC | 5 | 4.249  | 18.349 | -0.383 | 0.00 | 0.00 |
| ATOM | 141 | C4   | RC | 5 | 3.661  | 18.347 | 1.695  | 0.00 | 0.00 |
| ATOM | 142 | N4   | RC | 5 | 2.439  | 18.019 | 1.483  | 0.00 | 0.00 |
| ATOM | 143 | H41  | RC | 5 | 1.846  | 17.966 | 2.270  | 0.00 | 0.00 |
| ATOM | 144 | H42  | RC | 5 | 2.119  | 17.905 | 0.566  | 0.00 | 0.00 |
| ATOM | 145 | N3   | RC | 5 | 4.003  | 18.514 | 2.942  | 0.00 | 0.00 |
| ATOM | 146 | C2   | RC | 5 | 5.261  | 18.877 | 3.218  | 0.00 | 0.00 |
| ATOM | 147 | O2   | RC | 5 | 5.575  | 19.007 | 4.387  | 0.00 | 0.00 |
| ATOM | 148 | C3'  | RC | 5 | 9.093  | 17.931 | 1.808  | 0.00 | 0.00 |
| ATOM | 149 | H3'  | RC | 5 | 8.421  | 17.415 | 1.146  | 0.00 | 0.00 |
| ATOM | 150 | C2'  | RC | 5 | 8.367  | 18.353 | 3.065  | 0.00 | 0.00 |
| ATOM | 151 | 1H2' | RC | 5 | 7.754  | 17.558 | 3.449  | 0.00 | 0.00 |
| ATOM | 152 | O2'  | RC | 5 | 9.242  | 18.813 | 4.058  | 0.00 | 0.00 |
| ATOM | 153 | 2HO' | RC | 5 | 9.863  | 18.435 | 4.082  | 0.00 | 0.00 |
| ATOM | 154 | O3'  | RC | 5 | 10.245 | 17.177 | 2.095  | 0.00 | 0.00 |
| ATOM | 155 | P    | RU | 6 | 10.182 | 15.612 | 2.192  | 0.00 | 0.00 |
| ATOM | 156 | O1P  | RU | 6 | 11.515 | 15.132 | 2.535  | 0.00 | 0.00 |
| ATOM | 157 | O2P  | RU | 6 | 9.561  | 15.130 | 0.972  | 0.00 | 0.00 |
| ATOM | 158 | O5'  | RU | 6 | 9.212  | 15.271 | 3.391  | 0.00 | 0.00 |
| ATOM | 159 | C5'  | RU | 6 | 9.599  | 15.422 | 4.730  | 0.00 | 0.00 |
| ATOM | 160 | 1H5' | RU | 6 | 9.919  | 16.432 | 4.897  | 0.00 | 0.00 |
| ATOM | 161 | 2H5' | RU | 6 | 10.409 | 14.755 | 4.946  | 0.00 | 0.00 |
| ATOM | 162 | C4'  | RU | 6 | 8.454  | 15.114 | 5.672  | 0.00 | 0.00 |
| ATOM | 163 | H4'  | RU | 6 | 8.791  | 15.315 | 6.672  | 0.00 | 0.00 |
| ATOM | 164 | O4'  | RU | 6 | 7.309  | 15.894 | 5.426  | 0.00 | 0.00 |
| ATOM | 165 | C1'  | RU | 6 | 6.162  | 15.166 | 5.822  | 0.00 | 0.00 |
| ATOM | 166 | H1'  | RU | 6 | 5.725  | 15.641 | 6.684  | 0.00 | 0.00 |
| ATOM | 167 | N1   | RU | 6 | 5.137  | 15.086 | 4.765  | 0.00 | 0.00 |
| ATOM | 168 | C6   | RU | 6 | 5.460  | 15.122 | 3.434  | 0.00 | 0.00 |
| ATOM | 169 | H6   | RU | 6 | 6.483  | 15.220 | 3.153  | 0.00 | 0.00 |
| ATOM | 170 | C5   | RU | 6 | 4.491  | 15.042 | 2.492  | 0.00 | 0.00 |
| ATOM | 171 | H5   | RU | 6 | 4.731  | 15.084 | 1.455  | 0.00 | 0.00 |
| ATOM | 172 | C4   | RU | 6 | 3.105  | 14.904 | 2.841  | 0.00 | 0.00 |
| ATOM | 173 | O4   | RU | 6 | 2.179  | 14.813 | 2.065  | 0.00 | 0.00 |
| ATOM | 174 | N3   | RU | 6 | 2.874  | 14.860 | 4.172  | 0.00 | 0.00 |
| ATOM | 175 | H3   | RU | 6 | 1.931  | 14.724 | 4.463  | 0.00 | 0.00 |
| ATOM | 176 | C2   | RU | 6 | 3.816  | 14.914 | 5.158  | 0.00 | 0.00 |
| ATOM | 177 | O2   | RU | 6 | 3.477  | 14.793 | 6.316  | 0.00 | 0.00 |
| ATOM | 178 | C3'  | RU | 6 | 8.015  | 13.668 | 5.612  | 0.00 | 0.00 |
| ATOM | 179 | H3'  | RU | 6 | 7.928  | 13.365 | 4.586  | 0.00 | 0.00 |
| ATOM | 180 | C2'  | RU | 6 | 6.630  | 13.774 | 6.229  | 0.00 | 0.00 |
| ATOM | 181 | 1H2' | RU | 6 | 5.992  | 13.008 | 5.837  | 0.00 | 0.00 |
| ATOM | 182 | O2'  | RU | 6 | 6.669  | 13.709 | 7.627  | 0.00 | 0.00 |
| ATOM | 183 | 2HO' | RU | 6 | 7.028  | 12.983 | 7.831  | 0.00 | 0.00 |
| ATOM | 184 | O3'  | RU | 6 | 8.900  | 12.836 | 6.318  | 0.00 | 0.00 |
| ATOM | 185 | P    | RG | 7 | 8.747  | 11.277 | 6.311  | 0.00 | 0.00 |
| ATOM | 186 | O1P  | RG | 7 | 9.884  | 10.719 | 7.013  | 0.00 | 0.00 |
| ATOM | 187 | O2P  | RG | 7 | 8.487  | 10.863 | 4.951  | 0.00 | 0.00 |
| ATOM | 188 | O5'  | RG | 7 | 7.478  | 11.030 | 7.195  | 0.00 | 0.00 |
| ATOM | 189 | C5'  | RG | 7 | 6.681  | 9.901  | 7.080  | 0.00 | 0.00 |
| ATOM | 190 | 1H5' | RG | 7 | 7.221  | 9.071  | 7.439  | 0.00 | 0.00 |
| ATOM | 191 | 2H5' | RG | 7 | 6.441  | 9.738  | 6.072  | 0.00 | 0.00 |
| ATOM | 192 | C4'  | RG | 7 | 5.397  | 10.078 | 7.875  | 0.00 | 0.00 |
| ATOM | 193 | H4'  | RG | 7 | 5.650  | 10.462 | 8.846  | 0.00 | 0.00 |
| ATOM | 194 | O4'  | RG | 7 | 4.537  | 10.974 | 7.200  | 0.00 | 0.00 |
| ATOM | 195 | C1'  | RG | 7 | 3.377  | 10.280 | 6.789  | 0.00 | 0.00 |
| ATOM | 196 | H1'  | RG | 7 | 2.600  | 10.436 | 7.521  | 0.00 | 0.00 |
| ATOM | 197 | N9   | RG | 7 | 2.904  | 10.743 | 5.475  | 0.00 | 0.00 |

|      |     |      |    |   |        |        |        |      |      |
|------|-----|------|----|---|--------|--------|--------|------|------|
| ATOM | 198 | C8   | RG | 7 | 3.631  | 11.040 | 4.372  | 0.00 | 0.00 |
| ATOM | 199 | H8   | RG | 7 | 4.695  | 10.985 | 4.363  | 0.00 | 0.00 |
| ATOM | 200 | N7   | RG | 7 | 2.919  | 11.385 | 3.341  | 0.00 | 0.00 |
| ATOM | 201 | C5   | RG | 7 | 1.615  | 11.305 | 3.796  | 0.00 | 0.00 |
| ATOM | 202 | C6   | RG | 7 | 0.363  | 11.535 | 3.139  | 0.00 | 0.00 |
| ATOM | 203 | O6   | RG | 7 | 0.140  | 11.874 | 1.991  | 0.00 | 0.00 |
| ATOM | 204 | N1   | RG | 7 | -0.719 | 11.326 | 3.939  | 0.00 | 0.00 |
| ATOM | 205 | H1   | RG | 7 | -1.623 | 11.476 | 3.548  | 0.00 | 0.00 |
| ATOM | 206 | C2   | RG | 7 | -0.627 | 10.930 | 5.216  | 0.00 | 0.00 |
| ATOM | 207 | N2   | RG | 7 | -1.730 | 10.782 | 5.862  | 0.00 | 0.00 |
| ATOM | 208 | H21  | RG | 7 | -2.605 | 10.930 | 5.414  | 0.00 | 0.00 |
| ATOM | 209 | H22  | RG | 7 | -1.686 | 10.503 | 6.806  | 0.00 | 0.00 |
| ATOM | 210 | N3   | RG | 7 | 0.504  | 10.675 | 5.861  | 0.00 | 0.00 |
| ATOM | 211 | C4   | RG | 7 | 1.600  | 10.896 | 5.098  | 0.00 | 0.00 |
| ATOM | 212 | C3'  | RG | 7 | 4.644  | 8.760  | 8.030  | 0.00 | 0.00 |
| ATOM | 213 | H3'  | RG | 7 | 5.309  | 7.912  | 8.002  | 0.00 | 0.00 |
| ATOM | 214 | C2'  | RG | 7 | 3.740  | 8.809  | 6.808  | 0.00 | 0.00 |
| ATOM | 215 | 1H2' | RG | 7 | 4.313  | 8.585  | 5.926  | 0.00 | 0.00 |
| ATOM | 216 | O2'  | RG | 7 | 2.625  | 7.951  | 6.886  | 0.00 | 0.00 |
| ATOM | 217 | 2HO' | RG | 7 | 2.912  | 7.068  | 6.881  | 0.00 | 0.00 |
| ATOM | 218 | O3'  | RG | 7 | 3.880  | 8.772  | 9.206  | 0.00 | 0.00 |
| ATOM | 219 | P    | RA | 8 | 4.467  | 8.291  | 10.574 | 0.00 | 0.00 |
| ATOM | 220 | O1P  | RA | 8 | 3.428  | 8.445  | 11.563 | 0.00 | 0.00 |
| ATOM | 221 | O2P  | RA | 8 | 5.751  | 8.933  | 10.788 | 0.00 | 0.00 |
| ATOM | 222 | O5'  | RA | 8 | 4.728  | 6.762  | 10.399 | 0.00 | 0.00 |
| ATOM | 223 | C5'  | RA | 8 | 3.749  | 5.891  | 9.921  | 0.00 | 0.00 |
| ATOM | 224 | 1H5' | RA | 8 | 3.535  | 6.144  | 8.914  | 0.00 | 0.00 |
| ATOM | 225 | 2H5' | RA | 8 | 2.859  | 5.985  | 10.484 | 0.00 | 0.00 |
| ATOM | 226 | C4'  | RA | 8 | 4.251  | 4.476  | 9.991  | 0.00 | 0.00 |
| ATOM | 227 | H4'  | RA | 8 | 5.261  | 4.464  | 9.658  | 0.00 | 0.00 |
| ATOM | 228 | O4'  | RA | 8 | 4.181  | 4.032  | 11.303 | 0.00 | 0.00 |
| ATOM | 229 | C1'  | RA | 8 | 3.949  | 2.658  | 11.352 | 0.00 | 0.00 |
| ATOM | 230 | H1'  | RA | 8 | 4.814  | 2.174  | 11.724 | 0.00 | 0.00 |
| ATOM | 231 | N9   | RA | 8 | 2.828  | 2.305  | 12.212 | 0.00 | 0.00 |
| ATOM | 232 | C8   | RA | 8 | 2.783  | 1.358  | 13.107 | 0.00 | 0.00 |
| ATOM | 233 | H8   | RA | 8 | 3.616  | 0.800  | 13.303 | 0.00 | 0.00 |
| ATOM | 234 | N7   | RA | 8 | 1.650  | 1.206  | 13.688 | 0.00 | 0.00 |
| ATOM | 235 | C5   | RA | 8 | 0.872  | 2.102  | 13.117 | 0.00 | 0.00 |
| ATOM | 236 | C6   | RA | 8 | -0.450 | 2.453  | 13.246 | 0.00 | 0.00 |
| ATOM | 237 | N6   | RA | 8 | -1.296 | 1.973  | 14.073 | 0.00 | 0.00 |
| ATOM | 238 | H61  | RA | 8 | -2.199 | 2.292  | 14.070 | 0.00 | 0.00 |
| ATOM | 239 | H62  | RA | 8 | -1.011 | 1.326  | 14.683 | 0.00 | 0.00 |
| ATOM | 240 | N1   | RA | 8 | -0.950 | 3.339  | 12.525 | 0.00 | 0.00 |
| ATOM | 241 | C2   | RA | 8 | -0.160 | 3.892  | 11.679 | 0.00 | 0.00 |
| ATOM | 242 | H2   | RA | 8 | -0.571 | 4.622  | 11.118 | 0.00 | 0.00 |
| ATOM | 243 | N3   | RA | 8 | 1.101  | 3.684  | 11.448 | 0.00 | 0.00 |
| ATOM | 244 | C4   | RA | 8 | 1.572  | 2.763  | 12.203 | 0.00 | 0.00 |
| ATOM | 245 | C3'  | RA | 8 | 3.473  | 3.471  | 9.165  | 0.00 | 0.00 |
| ATOM | 246 | H3'  | RA | 8 | 2.434  | 3.695  | 9.208  | 0.00 | 0.00 |
| ATOM | 247 | C2'  | RA | 8 | 3.732  | 2.195  | 9.933  | 0.00 | 0.00 |
| ATOM | 248 | 1H2' | RA | 8 | 2.889  | 1.542  | 9.872  | 0.00 | 0.00 |
| ATOM | 249 | O2'  | RA | 8 | 4.874  | 1.542  | 9.499  | 0.00 | 0.00 |
| ATOM | 250 | 2HO' | RA | 8 | 4.944  | 1.637  | 8.634  | 0.00 | 0.00 |
| ATOM | 251 | O3'  | RA | 8 | 3.910  | 3.273  | 7.857  | 0.00 | 0.00 |
| ATOM | 252 | P    | RG | 9 | 3.257  | 3.955  | 6.636  | 0.00 | 0.00 |
| ATOM | 253 | O1P  | RG | 9 | 3.752  | 3.261  | 5.471  | 0.00 | 0.00 |
| ATOM | 254 | O2P  | RG | 9 | 3.489  | 5.384  | 6.729  | 0.00 | 0.00 |
| ATOM | 255 | O5'  | RG | 9 | 1.719  | 3.689  | 6.744  | 0.00 | 0.00 |
| ATOM | 256 | C5'  | RG | 9 | 1.139  | 2.456  | 6.399  | 0.00 | 0.00 |
| ATOM | 257 | 1H5' | RG | 9 | 1.549  | 2.098  | 5.486  | 0.00 | 0.00 |
| ATOM | 258 | 2H5' | RG | 9 | 0.104  | 2.605  | 6.267  | 0.00 | 0.00 |
| ATOM | 259 | C4'  | RG | 9 | 1.317  | 1.413  | 7.468  | 0.00 | 0.00 |
| ATOM | 260 | H4'  | RG | 9 | 2.346  | 1.347  | 7.704  | 0.00 | 0.00 |
| ATOM | 261 | O4'  | RG | 9 | 0.585  | 1.736  | 8.607  | 0.00 | 0.00 |
| ATOM | 262 | C1'  | RG | 9 | 0.256  | 0.582  | 9.306  | 0.00 | 0.00 |
| ATOM | 263 | H1'  | RG | 9 | 0.804  | 0.538  | 10.213 | 0.00 | 0.00 |
| ATOM | 264 | N9   | RG | 9 | -1.139 | 0.557  | 9.667  | 0.00 | 0.00 |
| ATOM | 265 | C8   | RG | 9 | -2.169 | 1.063  | 9.054  | 0.00 | 0.00 |

|      |     |      |    |    |        |        |        |      |      |
|------|-----|------|----|----|--------|--------|--------|------|------|
| ATOM | 266 | H8   | RG | 9  | -2.058 | 1.577  | 8.167  | 0.00 | 0.00 |
| ATOM | 267 | N7   | RG | 9  | -3.280 | 0.903  | 9.655  | 0.00 | 0.00 |
| ATOM | 268 | C5   | RG | 9  | -2.963 | 0.207  | 10.745 | 0.00 | 0.00 |
| ATOM | 269 | C6   | RG | 9  | -3.744 | -0.272 | 11.804 | 0.00 | 0.00 |
| ATOM | 270 | O6   | RG | 9  | -4.908 | -0.174 | 12.003 | 0.00 | 0.00 |
| ATOM | 271 | N1   | RG | 9  | -3.057 | -0.934 | 12.694 | 0.00 | 0.00 |
| ATOM | 272 | H1   | RG | 9  | -3.553 | -1.314 | 13.431 | 0.00 | 0.00 |
| ATOM | 273 | C2   | RG | 9  | -1.765 | -1.114 | 12.596 | 0.00 | 0.00 |
| ATOM | 274 | N2   | RG | 9  | -1.240 | -1.716 | 13.531 | 0.00 | 0.00 |
| ATOM | 275 | H21  | RG | 9  | -1.795 | -2.065 | 14.240 | 0.00 | 0.00 |
| ATOM | 276 | H22  | RG | 9  | -0.299 | -1.826 | 13.487 | 0.00 | 0.00 |
| ATOM | 277 | N3   | RG | 9  | -1.000 | -0.676 | 11.646 | 0.00 | 0.00 |
| ATOM | 278 | C4   | RG | 9  | -1.657 | -0.021 | 10.744 | 0.00 | 0.00 |
| ATOM | 279 | C3'  | RG | 9  | 0.882  | 0.025  | 7.063  | 0.00 | 0.00 |
| ATOM | 280 | H3'  | RG | 9  | -0.037 | 0.080  | 6.527  | 0.00 | 0.00 |
| ATOM | 281 | C2'  | RG | 9  | 0.633  | -0.586 | 8.419  | 0.00 | 0.00 |
| ATOM | 282 | 1H2' | RG | 9  | -0.157 | -1.287 | 8.371  | 0.00 | 0.00 |
| ATOM | 283 | O2'  | RG | 9  | 1.763  | -1.170 | 8.940  | 0.00 | 0.00 |
| ATOM | 284 | 2HO' | RG | 9  | 2.025  | -1.812 | 8.351  | 0.00 | 0.00 |
| ATOM | 285 | O3'  | RG | 9  | 1.869  | -0.614 | 6.310  | 0.00 | 0.00 |
| ATOM | 286 | P    | RG | 10 | 1.653  | -2.035 | 5.687  | 0.00 | 0.00 |
| ATOM | 287 | O1P  | RG | 10 | 0.616  | -1.920 | 4.687  | 0.00 | 0.00 |
| ATOM | 288 | O2P  | RG | 10 | 1.499  | -2.981 | 6.772  | 0.00 | 0.00 |
| ATOM | 289 | O5'  | RG | 10 | 3.003  | -2.335 | 4.950  | 0.00 | 0.00 |
| ATOM | 290 | C5'  | RG | 10 | 4.190  | -2.514 | 5.661  | 0.00 | 0.00 |
| ATOM | 291 | 1H5' | RG | 10 | 4.030  | -3.225 | 6.429  | 0.00 | 0.00 |
| ATOM | 292 | 2H5' | RG | 10 | 4.477  | -1.590 | 6.105  | 0.00 | 0.00 |
| ATOM | 293 | C4'  | RG | 10 | 5.332  | -2.986 | 4.791  | 0.00 | 0.00 |
| ATOM | 294 | H4'  | RG | 10 | 6.238  | -2.893 | 5.357  | 0.00 | 0.00 |
| ATOM | 295 | O4'  | RG | 10 | 5.187  | -4.345 | 4.448  | 0.00 | 0.00 |
| ATOM | 296 | C1'  | RG | 10 | 5.350  | -4.504 | 3.059  | 0.00 | 0.00 |
| ATOM | 297 | H1'  | RG | 10 | 5.946  | -5.371 | 2.851  | 0.00 | 0.00 |
| ATOM | 298 | N9   | RG | 10 | 4.042  | -4.687 | 2.402  | 0.00 | 0.00 |
| ATOM | 299 | C8   | RG | 10 | 2.792  | -4.712 | 2.951  | 0.00 | 0.00 |
| ATOM | 300 | H8   | RG | 10 | 2.620  | -4.540 | 3.992  | 0.00 | 0.00 |
| ATOM | 301 | N7   | RG | 10 | 1.832  | -4.986 | 2.117  | 0.00 | 0.00 |
| ATOM | 302 | C5   | RG | 10 | 2.499  | -5.190 | 0.915  | 0.00 | 0.00 |
| ATOM | 303 | C6   | RG | 10 | 2.027  | -5.570 | -0.382 | 0.00 | 0.00 |
| ATOM | 304 | O6   | RG | 10 | 0.893  | -5.842 | -0.744 | 0.00 | 0.00 |
| ATOM | 305 | N1   | RG | 10 | 3.014  | -5.635 | -1.328 | 0.00 | 0.00 |
| ATOM | 306 | H1   | RG | 10 | 2.742  | -5.899 | -2.252 | 0.00 | 0.00 |
| ATOM | 307 | C2   | RG | 10 | 4.309  | -5.400 | -1.068 | 0.00 | 0.00 |
| ATOM | 308 | N2   | RG | 10 | 5.119  | -5.465 | -2.078 | 0.00 | 0.00 |
| ATOM | 309 | H21  | RG | 10 | 4.767  | -5.680 | -2.984 | 0.00 | 0.00 |
| ATOM | 310 | H22  | RG | 10 | 6.076  | -5.283 | -1.902 | 0.00 | 0.00 |
| ATOM | 311 | N3   | RG | 10 | 4.804  | -5.061 | 0.112  | 0.00 | 0.00 |
| ATOM | 312 | C4   | RG | 10 | 3.846  | -4.978 | 1.079  | 0.00 | 0.00 |
| ATOM | 313 | C3'  | RG | 10 | 5.515  | -2.208 | 3.515  | 0.00 | 0.00 |
| ATOM | 314 | H3'  | RG | 10 | 4.569  | -1.890 | 3.127  | 0.00 | 0.00 |
| ATOM | 315 | C2'  | RG | 10 | 6.085  | -3.266 | 2.591  | 0.00 | 0.00 |
| ATOM | 316 | 1H2' | RG | 10 | 5.859  | -3.027 | 1.567  | 0.00 | 0.00 |
| ATOM | 317 | O2'  | RG | 10 | 7.465  | -3.447 | 2.771  | 0.00 | 0.00 |
| ATOM | 318 | 2HO' | RG | 10 | 7.801  | -3.002 | 2.972  | 0.00 | 0.00 |
| ATOM | 319 | O3'  | RG | 10 | 6.387  | -1.125 | 3.694  | 0.00 | 0.00 |
| ATOM | 320 | P    | RU | 11 | 6.148  | 0.249  | 2.993  | 0.00 | 0.00 |
| ATOM | 321 | O1P  | RU | 11 | 7.240  | 1.125  | 3.371  | 0.00 | 0.00 |
| ATOM | 322 | O2P  | RU | 11 | 4.788  | 0.661  | 3.292  | 0.00 | 0.00 |
| ATOM | 323 | O5'  | RU | 11 | 6.247  | -0.013 | 1.445  | 0.00 | 0.00 |
| ATOM | 324 | C5'  | RU | 11 | 7.479  | -0.233 | 0.820  | 0.00 | 0.00 |
| ATOM | 325 | 1H5' | RU | 11 | 8.017  | -0.986 | 1.351  | 0.00 | 0.00 |
| ATOM | 326 | 2H5' | RU | 11 | 8.054  | 0.664  | 0.848  | 0.00 | 0.00 |
| ATOM | 327 | C4'  | RU | 11 | 7.342  | -0.667 | -0.624 | 0.00 | 0.00 |
| ATOM | 328 | H4'  | RU | 11 | 8.332  | -0.776 | -1.030 | 0.00 | 0.00 |
| ATOM | 329 | O4'  | RU | 11 | 6.669  | -1.905 | -0.753 | 0.00 | 0.00 |
| ATOM | 330 | C1'  | RU | 11 | 5.940  | -1.914 | -1.967 | 0.00 | 0.00 |
| ATOM | 331 | H1'  | RU | 11 | 6.273  | -2.732 | -2.588 | 0.00 | 0.00 |
| ATOM | 332 | N1   | RU | 11 | 4.469  | -2.042 | -1.769 | 0.00 | 0.00 |
| ATOM | 333 | C6   | RU | 11 | 3.867  | -1.806 | -0.561 | 0.00 | 0.00 |

|      |     |      |    |    |        |        |         |      |      |
|------|-----|------|----|----|--------|--------|---------|------|------|
| ATOM | 334 | H6   | RU | 11 | 4.461  | -1.509 | 0.276   | 0.00 | 0.00 |
| ATOM | 335 | C5   | RU | 11 | 2.533  | -1.949 | -0.415  | 0.00 | 0.00 |
| ATOM | 336 | H5   | RU | 11 | 2.078  | -1.761 | 0.528   | 0.00 | 0.00 |
| ATOM | 337 | C4   | RU | 11 | 1.693  | -2.354 | -1.503  | 0.00 | 0.00 |
| ATOM | 338 | O4   | RU | 11 | 0.488  | -2.517 | -1.457  | 0.00 | 0.00 |
| ATOM | 339 | N3   | RU | 11 | 2.361  | -2.575 | -2.666  | 0.00 | 0.00 |
| ATOM | 340 | H3   | RU | 11 | 1.814  | -2.851 | -3.445  | 0.00 | 0.00 |
| ATOM | 341 | C2   | RU | 11 | 3.707  | -2.425 | -2.868  | 0.00 | 0.00 |
| ATOM | 342 | O2   | RU | 11 | 4.175  | -2.618 | -3.978  | 0.00 | 0.00 |
| ATOM | 343 | C3'  | RU | 11 | 6.580  | 0.302  | -1.507  | 0.00 | 0.00 |
| ATOM | 344 | H3'  | RU | 11 | 5.658  | 0.554  | -1.011  | 0.00 | 0.00 |
| ATOM | 345 | C2'  | RU | 11 | 6.279  | -0.610 | -2.678  | 0.00 | 0.00 |
| ATOM | 346 | 1H2' | RU | 11 | 5.449  | -0.235 | -3.247  | 0.00 | 0.00 |
| ATOM | 347 | O2'  | RU | 11 | 7.390  | -0.827 | -3.510  | 0.00 | 0.00 |
| ATOM | 348 | 2HO' | RU | 11 | 7.649  | -0.553 | -3.735  | 0.00 | 0.00 |
| ATOM | 349 | O3'  | RU | 11 | 7.294  | 1.469  | -1.882  | 0.00 | 0.00 |
| ATOM | 350 | P    | RG | 12 | 6.538  | 2.711  | -2.494  | 0.00 | 0.00 |
| ATOM | 351 | O1P  | RG | 12 | 7.483  | 3.829  | -2.604  | 0.00 | 0.00 |
| ATOM | 352 | O2P  | RG | 12 | 5.308  | 2.920  | -1.737  | 0.00 | 0.00 |
| ATOM | 353 | O5'  | RG | 12 | 6.116  | 2.296  | -3.954  | 0.00 | 0.00 |
| ATOM | 354 | C5'  | RG | 12 | 7.055  | 2.151  | -4.995  | 0.00 | 0.00 |
| ATOM | 355 | 1H5' | RG | 12 | 7.795  | 1.418  | -4.734  | 0.00 | 0.00 |
| ATOM | 356 | 2H5' | RG | 12 | 7.560  | 3.084  | -5.163  | 0.00 | 0.00 |
| ATOM | 357 | C4'  | RG | 12 | 6.367  | 1.736  | -6.285  | 0.00 | 0.00 |
| ATOM | 358 | H4'  | RG | 12 | 7.120  | 1.603  | -7.046  | 0.00 | 0.00 |
| ATOM | 359 | O4'  | RG | 12 | 5.651  | 0.523  | -6.162  | 0.00 | 0.00 |
| ATOM | 360 | C1'  | RG | 12 | 4.452  | 0.614  | -6.910  | 0.00 | 0.00 |
| ATOM | 361 | H1'  | RG | 12 | 4.391  | -0.203 | -7.609  | 0.00 | 0.00 |
| ATOM | 362 | N9   | RG | 12 | 3.278  | 0.515  | -6.018  | 0.00 | 0.00 |
| ATOM | 363 | C8   | RG | 12 | 3.181  | 0.780  | -4.686  | 0.00 | 0.00 |
| ATOM | 364 | H8   | RG | 12 | 3.995  | 1.180  | -4.129  | 0.00 | 0.00 |
| ATOM | 365 | N7   | RG | 12 | 2.039  | 0.481  | -4.146  | 0.00 | 0.00 |
| ATOM | 366 | C5   | RG | 12 | 1.290  | 0.013  | -5.219  | 0.00 | 0.00 |
| ATOM | 367 | C6   | RG | 12 | -0.058 | -0.477 | -5.307  | 0.00 | 0.00 |
| ATOM | 368 | O6   | RG | 12 | -0.884 | -0.650 | -4.422  | 0.00 | 0.00 |
| ATOM | 369 | N1   | RG | 12 | -0.451 | -0.785 | -6.581  | 0.00 | 0.00 |
| ATOM | 370 | H1   | RG | 12 | -1.386 | -1.112 | -6.703  | 0.00 | 0.00 |
| ATOM | 371 | C2   | RG | 12 | 0.352  | -0.672 | -7.654  | 0.00 | 0.00 |
| ATOM | 372 | N2   | RG | 12 | -0.160 | -0.972 | -8.801  | 0.00 | 0.00 |
| ATOM | 373 | H21  | RG | 12 | -1.113 | -1.241 | -8.859  | 0.00 | 0.00 |
| ATOM | 374 | H22  | RG | 12 | 0.402  | -0.874 | -9.598  | 0.00 | 0.00 |
| ATOM | 375 | N3   | RG | 12 | 1.615  | -0.266 | -7.619  | 0.00 | 0.00 |
| ATOM | 376 | C4   | RG | 12 | 2.033  | 0.070  | -6.372  | 0.00 | 0.00 |
| ATOM | 377 | C3'  | RG | 12 | 5.396  | 2.777  | -6.796  | 0.00 | 0.00 |
| ATOM | 378 | H3'  | RG | 12 | 4.815  | 3.166  | -5.976  | 0.00 | 0.00 |
| ATOM | 379 | C2'  | RG | 12 | 4.492  | 1.926  | -7.678  | 0.00 | 0.00 |
| ATOM | 380 | 1H2' | RG | 12 | 3.508  | 2.355  | -7.764  | 0.00 | 0.00 |
| ATOM | 381 | O2'  | RG | 12 | 5.040  | 1.689  | -8.946  | 0.00 | 0.00 |
| ATOM | 382 | 2HO' | RG | 12 | 5.359  | 2.278  | -9.216  | 0.00 | 0.00 |
| ATOM | 383 | O3'  | RG | 12 | 6.070  | 3.795  | -7.502  | 0.00 | 0.00 |
| ATOM | 384 | P    | RC | 13 | 5.619  | 5.286  | -7.448  | 0.00 | 0.00 |
| ATOM | 385 | O1P  | RC | 13 | 6.616  | 6.072  | -8.156  | 0.00 | 0.00 |
| ATOM | 386 | O2P  | RC | 13 | 5.320  | 5.620  | -6.063  | 0.00 | 0.00 |
| ATOM | 387 | O5'  | RC | 13 | 4.283  | 5.312  | -8.268  | 0.00 | 0.00 |
| ATOM | 388 | C5'  | RC | 13 | 4.276  | 5.231  | -9.666  | 0.00 | 0.00 |
| ATOM | 389 | 1H5' | RC | 13 | 4.926  | 4.447  | -9.987  | 0.00 | 0.00 |
| ATOM | 390 | 2H5' | RC | 13 | 4.635  | 6.150  | -10.078 | 0.00 | 0.00 |
| ATOM | 391 | C4'  | RC | 13 | 2.896  | 4.960  | -10.212 | 0.00 | 0.00 |
| ATOM | 392 | H4'  | RC | 13 | 2.955  | 4.933  | -11.283 | 0.00 | 0.00 |
| ATOM | 393 | O4'  | RC | 13 | 2.384  | 3.726  | -9.753  | 0.00 | 0.00 |
| ATOM | 394 | C1'  | RC | 13 | 0.978  | 3.815  | -9.638  | 0.00 | 0.00 |
| ATOM | 395 | H1'  | RC | 13 | 0.517  | 3.123  | -10.318 | 0.00 | 0.00 |
| ATOM | 396 | N1   | RC | 13 | 0.519  | 3.502  | -8.264  | 0.00 | 0.00 |
| ATOM | 397 | C6   | RC | 13 | 1.227  | 3.882  | -7.161  | 0.00 | 0.00 |
| ATOM | 398 | H6   | RC | 13 | 2.150  | 4.406  | -7.276  | 0.00 | 0.00 |
| ATOM | 399 | C5   | RC | 13 | 0.776  | 3.591  | -5.924  | 0.00 | 0.00 |
| ATOM | 400 | H5   | RC | 13 | 1.332  | 3.886  | -5.066  | 0.00 | 0.00 |
| ATOM | 401 | C4   | RC | 13 | -0.450 | 2.910  | -5.835  | 0.00 | 0.00 |

|      |     |      |    |    |        |        |         |      |      |
|------|-----|------|----|----|--------|--------|---------|------|------|
| ATOM | 402 | N4   | RC | 13 | -0.940 | 2.599  | -4.684  | 0.00 | 0.00 |
| ATOM | 403 | H41  | RC | 13 | -1.788 | 2.092  | -4.652  | 0.00 | 0.00 |
| ATOM | 404 | H42  | RC | 13 | -0.472 | 2.878  | -3.868  | 0.00 | 0.00 |
| ATOM | 405 | N3   | RC | 13 | -1.153 | 2.548  | -6.877  | 0.00 | 0.00 |
| ATOM | 406 | C2   | RC | 13 | -0.681 | 2.828  | -8.107  | 0.00 | 0.00 |
| ATOM | 407 | O2   | RC | 13 | -1.354 | 2.491  | -9.067  | 0.00 | 0.00 |
| ATOM | 408 | C3'  | RC | 13 | 1.875  | 6.007  | -9.844  | 0.00 | 0.00 |
| ATOM | 409 | H3'  | RC | 13 | 1.977  | 6.228  | -8.802  | 0.00 | 0.00 |
| ATOM | 410 | C2'  | RC | 13 | 0.588  | 5.219  | -10.057 | 0.00 | 0.00 |
| ATOM | 411 | 1H2' | RC | 13 | -0.204 | 5.603  | -9.455  | 0.00 | 0.00 |
| ATOM | 412 | O2'  | RC | 13 | 0.213  | 5.175  | -11.401 | 0.00 | 0.00 |
| ATOM | 413 | 2HO' | RC | 13 | 0.101  | 5.778  | -11.668 | 0.00 | 0.00 |
| ATOM | 414 | O3'  | RC | 13 | 1.970  | 7.179  | -10.615 | 0.00 | 0.00 |
| ATOM | 415 | P    | RA | 14 | 1.375  | 8.527  | -10.088 | 0.00 | 0.00 |
| ATOM | 416 | O1P  | RA | 14 | 1.761  | 9.565  | -11.021 | 0.00 | 0.00 |
| ATOM | 417 | O2P  | RA | 14 | 1.749  | 8.668  | -8.698  | 0.00 | 0.00 |
| ATOM | 418 | O5'  | RA | 14 | -0.187 | 8.348  | -10.148 | 0.00 | 0.00 |
| ATOM | 419 | C5'  | RA | 14 | -0.895 | 8.441  | -11.349 | 0.00 | 0.00 |
| ATOM | 420 | 1H5' | RA | 14 | -0.509 | 7.747  | -12.063 | 0.00 | 0.00 |
| ATOM | 421 | 2H5' | RA | 14 | -0.800 | 9.426  | -11.752 | 0.00 | 0.00 |
| ATOM | 422 | C4'  | RA | 14 | -2.372 | 8.150  | -11.141 | 0.00 | 0.00 |
| ATOM | 423 | H4'  | RA | 14 | -2.863 | 8.263  | -12.092 | 0.00 | 0.00 |
| ATOM | 424 | O4'  | RA | 14 | -2.577 | 6.835  | -10.671 | 0.00 | 0.00 |
| ATOM | 425 | C1'  | RA | 14 | -3.677 | 6.821  | -9.787  | 0.00 | 0.00 |
| ATOM | 426 | H1'  | RA | 14 | -4.422 | 6.116  | -10.115 | 0.00 | 0.00 |
| ATOM | 427 | N9   | RA | 14 | -3.244 | 6.452  | -8.427  | 0.00 | 0.00 |
| ATOM | 428 | C8   | RA | 14 | -2.099 | 6.752  | -7.768  | 0.00 | 0.00 |
| ATOM | 429 | H8   | RA | 14 | -1.345 | 7.343  | -8.205  | 0.00 | 0.00 |
| ATOM | 430 | N7   | RA | 14 | -2.007 | 6.273  | -6.565  | 0.00 | 0.00 |
| ATOM | 431 | C5   | RA | 14 | -3.208 | 5.624  | -6.411  | 0.00 | 0.00 |
| ATOM | 432 | C6   | RA | 14 | -3.812 | 4.899  | -5.372  | 0.00 | 0.00 |
| ATOM | 433 | N6   | RA | 14 | -3.286 | 4.627  | -4.209  | 0.00 | 0.00 |
| ATOM | 434 | H61  | RA | 14 | -3.781 | 4.065  | -3.572  | 0.00 | 0.00 |
| ATOM | 435 | H62  | RA | 14 | -2.382 | 4.930  | -4.019  | 0.00 | 0.00 |
| ATOM | 436 | N1   | RA | 14 | -5.029 | 4.442  | -5.503  | 0.00 | 0.00 |
| ATOM | 437 | C2   | RA | 14 | -5.643 | 4.653  | -6.646  | 0.00 | 0.00 |
| ATOM | 438 | H2   | RA | 14 | -6.614 | 4.246  | -6.718  | 0.00 | 0.00 |
| ATOM | 439 | N3   | RA | 14 | -5.205 | 5.285  | -7.710  | 0.00 | 0.00 |
| ATOM | 440 | C4   | RA | 14 | -3.972 | 5.758  | -7.527  | 0.00 | 0.00 |
| ATOM | 441 | C3'  | RA | 14 | -3.072 | 9.073  | -10.162 | 0.00 | 0.00 |
| ATOM | 442 | H3'  | RA | 14 | -2.449 | 9.204  | -9.294  | 0.00 | 0.00 |
| ATOM | 443 | C2'  | RA | 14 | -4.272 | 8.214  | -9.804  | 0.00 | 0.00 |
| ATOM | 444 | 1H2' | RA | 14 | -4.667 | 8.470  | -8.840  | 0.00 | 0.00 |
| ATOM | 445 | O2'  | RA | 14 | -5.284 | 8.292  | -10.771 | 0.00 | 0.00 |
| ATOM | 446 | 2HO' | RA | 14 | -5.541 | 9.161  | -10.819 | 0.00 | 0.00 |
| ATOM | 447 | O3'  | RA | 14 | -3.414 | 10.323 | -10.695 | 0.00 | 0.00 |
| ATOM | 448 | P    | RC | 15 | -3.920 | 11.492 | -10.034 | 0.00 | 0.00 |
| ATOM | 449 | O1P  | RC | 15 | -5.265 | 11.418 | -10.139 | 0.00 | 0.00 |
| ATOM | 450 | O2P  | RC | 15 | -3.338 | 12.537 | -10.620 | 0.00 | 0.00 |
| ATOM | 451 | O5'  | RC | 15 | -3.393 | 11.390 | -8.547  | 0.00 | 0.00 |
| ATOM | 452 | C5'  | RC | 15 | -4.122 | 11.802 | -7.416  | 0.00 | 0.00 |
| ATOM | 453 | 1H5' | RC | 15 | -4.525 | 12.772 | -7.590  | 0.00 | 0.00 |
| ATOM | 454 | 2H5' | RC | 15 | -3.449 | 11.867 | -6.593  | 0.00 | 0.00 |
| ATOM | 455 | C4'  | RC | 15 | -5.247 | 10.863 | -7.040  | 0.00 | 0.00 |
| ATOM | 456 | H4'  | RC | 15 | -5.964 | 10.828 | -7.830  | 0.00 | 0.00 |
| ATOM | 457 | O4'  | RC | 15 | -4.797 | 9.557  | -6.782  | 0.00 | 0.00 |
| ATOM | 458 | C1'  | RC | 15 | -5.602 | 8.936  | -5.796  | 0.00 | 0.00 |
| ATOM | 459 | H1'  | RC | 15 | -6.107 | 8.084  | -6.215  | 0.00 | 0.00 |
| ATOM | 460 | N1   | RC | 15 | -4.785 | 8.481  | -4.633  | 0.00 | 0.00 |
| ATOM | 461 | C6   | RC | 15 | -3.485 | 8.842  | -4.481  | 0.00 | 0.00 |
| ATOM | 462 | H6   | RC | 15 | -3.020 | 9.491  | -5.184  | 0.00 | 0.00 |
| ATOM | 463 | C5   | RC | 15 | -2.772 | 8.368  | -3.443  | 0.00 | 0.00 |
| ATOM | 464 | H5   | RC | 15 | -1.749 | 8.644  | -3.327  | 0.00 | 0.00 |
| ATOM | 465 | C4   | RC | 15 | -3.420 | 7.518  | -2.542  | 0.00 | 0.00 |
| ATOM | 466 | N4   | RC | 15 | -2.771 | 7.009  | -1.559  | 0.00 | 0.00 |
| ATOM | 467 | H41  | RC | 15 | -3.257 | 6.402  | -0.954  | 0.00 | 0.00 |
| ATOM | 468 | H42  | RC | 15 | -1.818 | 7.228  | -1.453  | 0.00 | 0.00 |
| ATOM | 469 | N3   | RC | 15 | -4.670 | 7.165  | -2.660  | 0.00 | 0.00 |

|      |     |      |    |    |         |        |        |      |      |
|------|-----|------|----|----|---------|--------|--------|------|------|
| ATOM | 470 | C2   | RC | 15 | -5.368  | 7.630  | -3.705 | 0.00 | 0.00 |
| ATOM | 471 | O2   | RC | 15 | -6.530  | 7.284  | -3.797 | 0.00 | 0.00 |
| ATOM | 472 | C3'  | RC | 15 | -5.946  | 11.274 | -5.762 | 0.00 | 0.00 |
| ATOM | 473 | H3'  | RC | 15 | -5.201  | 11.497 | -5.026 | 0.00 | 0.00 |
| ATOM | 474 | C2'  | RC | 15 | -6.634  | 9.972  | -5.399 | 0.00 | 0.00 |
| ATOM | 475 | 1H2' | RC | 15 | -6.869  | 9.927  | -4.353 | 0.00 | 0.00 |
| ATOM | 476 | O2'  | RC | 15 | -7.784  | 9.757  | -6.167 | 0.00 | 0.00 |
| ATOM | 477 | 2HO' | RC | 15 | -8.163  | 10.327 | -6.261 | 0.00 | 0.00 |
| ATOM | 478 | O3'  | RC | 15 | -6.850  | 12.318 | -5.928 | 0.00 | 0.00 |
| ATOM | 479 | P    | RA | 16 | -7.096  | 13.371 | -4.800 | 0.00 | 0.00 |
| ATOM | 480 | O1P  | RA | 16 | -8.111  | 14.276 | -5.265 | 0.00 | 0.00 |
| ATOM | 481 | O2P  | RA | 16 | -5.823  | 13.891 | -4.401 | 0.00 | 0.00 |
| ATOM | 482 | O5'  | RA | 16 | -7.663  | 12.566 | -3.594 | 0.00 | 0.00 |
| ATOM | 483 | C5'  | RA | 16 | -8.982  | 12.115 | -3.549 | 0.00 | 0.00 |
| ATOM | 484 | 1H5' | RA | 16 | -9.187  | 11.550 | -4.432 | 0.00 | 0.00 |
| ATOM | 485 | 2H5' | RA | 16 | -9.652  | 12.942 | -3.500 | 0.00 | 0.00 |
| ATOM | 486 | C4'  | RA | 16 | -9.223  | 11.237 | -2.337 | 0.00 | 0.00 |
| ATOM | 487 | H4'  | RA | 16 | -10.242 | 10.913 | -2.364 | 0.00 | 0.00 |
| ATOM | 488 | O4'  | RA | 16 | -8.389  | 10.113 | -2.340 | 0.00 | 0.00 |
| ATOM | 489 | C1'  | RA | 16 | -8.048  | 9.794  | -1.019 | 0.00 | 0.00 |
| ATOM | 490 | H1'  | RA | 16 | -8.323  | 8.784  | -0.796 | 0.00 | 0.00 |
| ATOM | 491 | N9   | RA | 16 | -6.608  | 9.962  | -0.812 | 0.00 | 0.00 |
| ATOM | 492 | C8   | RA | 16 | -5.712  | 10.656 | -1.555 | 0.00 | 0.00 |
| ATOM | 493 | H8   | RA | 16 | -5.986  | 11.191 | -2.425 | 0.00 | 0.00 |
| ATOM | 494 | N7   | RA | 16 | -4.494  | 10.576 | -1.142 | 0.00 | 0.00 |
| ATOM | 495 | C5   | RA | 16 | -4.601  | 9.782  | -0.015 | 0.00 | 0.00 |
| ATOM | 496 | C6   | RA | 16 | -3.698  | 9.285  | 0.928  | 0.00 | 0.00 |
| ATOM | 497 | N6   | RA | 16 | -2.414  | 9.456  | 0.917  | 0.00 | 0.00 |
| ATOM | 498 | H61  | RA | 16 | -1.886  | 9.062  | 1.636  | 0.00 | 0.00 |
| ATOM | 499 | H62  | RA | 16 | -2.007  | 9.981  | 0.202  | 0.00 | 0.00 |
| ATOM | 500 | N1   | RA | 16 | -4.119  | 8.575  | 1.947  | 0.00 | 0.00 |
| ATOM | 501 | C2   | RA | 16 | -5.403  | 8.318  | 2.031  | 0.00 | 0.00 |
| ATOM | 502 | H2   | RA | 16 | -5.705  | 7.744  | 2.861  | 0.00 | 0.00 |
| ATOM | 503 | N3   | RA | 16 | -6.357  | 8.680  | 1.211  | 0.00 | 0.00 |
| ATOM | 504 | C4   | RA | 16 | -5.889  | 9.424  | 0.198  | 0.00 | 0.00 |
| ATOM | 505 | C3'  | RA | 16 | -9.009  | 11.923 | -1.005 | 0.00 | 0.00 |
| ATOM | 506 | H3'  | RA | 16 | -8.097  | 12.482 | -1.050 | 0.00 | 0.00 |
| ATOM | 507 | C2'  | RA | 16 | -8.829  | 10.724 | -0.111 | 0.00 | 0.00 |
| ATOM | 508 | 1H2' | RA | 16 | -8.276  | 10.977 | 0.772  | 0.00 | 0.00 |
| ATOM | 509 | O2'  | RA | 16 | -10.043 | 10.101 | 0.224  | 0.00 | 0.00 |
| ATOM | 510 | 2HO' | RA | 16 | -10.412 | 10.282 | 0.389  | 0.00 | 0.00 |
| ATOM | 511 | O3'  | RA | 16 | -10.091 | 12.718 | -0.599 | 0.00 | 0.00 |
| ATOM | 512 | P    | RC | 17 | -9.887  | 13.966 | 0.295  | 0.00 | 0.00 |
| ATOM | 513 | O1P  | RC | 17 | -11.200 | 14.499 | 0.605  | 0.00 | 0.00 |
| ATOM | 514 | O2P  | RC | 17 | -8.915  | 14.816 | -0.364 | 0.00 | 0.00 |
| ATOM | 515 | O5'  | RC | 17 | -9.241  | 13.447 | 1.631  | 0.00 | 0.00 |
| ATOM | 516 | C5'  | RC | 17 | -9.977  | 12.717 | 2.579  | 0.00 | 0.00 |
| ATOM | 517 | 1H5' | RC | 17 | -10.463 | 11.891 | 2.105  | 0.00 | 0.00 |
| ATOM | 518 | 2H5' | RC | 17 | -10.732 | 13.349 | 3.011  | 0.00 | 0.00 |
| ATOM | 519 | C4'  | RC | 17 | -9.088  | 12.194 | 3.689  | 0.00 | 0.00 |
| ATOM | 520 | H4'  | RC | 17 | -9.702  | 11.650 | 4.386  | 0.00 | 0.00 |
| ATOM | 521 | O4'  | RC | 17 | -8.084  | 11.325 | 3.209  | 0.00 | 0.00 |
| ATOM | 522 | C1'  | RC | 17 | -6.916  | 11.467 | 4.004  | 0.00 | 0.00 |
| ATOM | 523 | H1'  | RC | 17 | -6.677  | 10.521 | 4.458  | 0.00 | 0.00 |
| ATOM | 524 | N1   | RC | 17 | -5.750  | 11.919 | 3.194  | 0.00 | 0.00 |
| ATOM | 525 | C6   | RC | 17 | -5.892  | 12.617 | 2.038  | 0.00 | 0.00 |
| ATOM | 526 | H6   | RC | 17 | -6.863  | 12.868 | 1.685  | 0.00 | 0.00 |
| ATOM | 527 | C5   | RC | 17 | -4.803  | 13.003 | 1.339  | 0.00 | 0.00 |
| ATOM | 528 | H5   | RC | 17 | -4.921  | 13.541 | 0.430  | 0.00 | 0.00 |
| ATOM | 529 | C4   | RC | 17 | -3.539  | 12.665 | 1.843  | 0.00 | 0.00 |
| ATOM | 530 | N4   | RC | 17 | -2.477  | 12.984 | 1.192  | 0.00 | 0.00 |
| ATOM | 531 | H41  | RC | 17 | -1.601  | 12.687 | 1.544  | 0.00 | 0.00 |
| ATOM | 532 | H42  | RC | 17 | -2.572  | 13.457 | 0.346  | 0.00 | 0.00 |
| ATOM | 533 | N3   | RC | 17 | -3.377  | 12.008 | 2.954  | 0.00 | 0.00 |
| ATOM | 534 | C2   | RC | 17 | -4.469  | 11.628 | 3.645  | 0.00 | 0.00 |
| ATOM | 535 | O2   | RC | 17 | -4.290  | 11.029 | 4.685  | 0.00 | 0.00 |
| ATOM | 536 | C3'  | RC | 17 | -8.369  | 13.278 | 4.456  | 0.00 | 0.00 |
| ATOM | 537 | H3'  | RC | 17 | -7.933  | 13.970 | 3.758  | 0.00 | 0.00 |

|      |     |      |    |    |         |        |        |      |      |
|------|-----|------|----|----|---------|--------|--------|------|------|
| ATOM | 538 | C2'  | RC | 17 | -7.264  | 12.463 | 5.103  | 0.00 | 0.00 |
| ATOM | 539 | 1H2' | RC | 17 | -6.426  | 13.082 | 5.359  | 0.00 | 0.00 |
| ATOM | 540 | O2'  | RC | 17 | -7.716  | 11.740 | 6.220  | 0.00 | 0.00 |
| ATOM | 541 | 2HO' | RC | 17 | -8.088  | 12.153 | 6.685  | 0.00 | 0.00 |
| ATOM | 542 | O3'  | RC | 17 | -9.208  | 13.925 | 5.392  | 0.00 | 0.00 |
| ATOM | 543 | P    | RA | 18 | -8.907  | 15.381 | 5.887  | 0.00 | 0.00 |
| ATOM | 544 | O1P  | RA | 18 | -10.006 | 15.782 | 6.759  | 0.00 | 0.00 |
| ATOM | 545 | O2P  | RA | 18 | -8.583  | 16.195 | 4.727  | 0.00 | 0.00 |
| ATOM | 546 | O5'  | RA | 18 | -7.604  | 15.236 | 6.751  | 0.00 | 0.00 |
| ATOM | 547 | C5'  | RA | 18 | -7.637  | 14.717 | 8.051  | 0.00 | 0.00 |
| ATOM | 548 | 1H5' | RA | 18 | -8.123  | 13.765 | 8.033  | 0.00 | 0.00 |
| ATOM | 549 | 2H5' | RA | 18 | -8.192  | 15.372 | 8.691  | 0.00 | 0.00 |
| ATOM | 550 | C4'  | RA | 18 | -6.245  | 14.540 | 8.616  | 0.00 | 0.00 |
| ATOM | 551 | H4'  | RA | 18 | -6.345  | 14.119 | 9.599  | 0.00 | 0.00 |
| ATOM | 552 | O4'  | RA | 18 | -5.458  | 13.675 | 7.835  | 0.00 | 0.00 |
| ATOM | 553 | C1'  | RA | 18 | -4.105  | 14.093 | 7.907  | 0.00 | 0.00 |
| ATOM | 554 | H1'  | RA | 18 | -3.488  | 13.297 | 8.283  | 0.00 | 0.00 |
| ATOM | 555 | N9   | RA | 18 | -3.598  | 14.472 | 6.581  | 0.00 | 0.00 |
| ATOM | 556 | C8   | RA | 18 | -4.282  | 14.931 | 5.496  | 0.00 | 0.00 |
| ATOM | 557 | H8   | RA | 18 | -5.337  | 15.096 | 5.512  | 0.00 | 0.00 |
| ATOM | 558 | N7   | RA | 18 | -3.548  | 15.143 | 4.445  | 0.00 | 0.00 |
| ATOM | 559 | C5   | RA | 18 | -2.266  | 14.824 | 4.889  | 0.00 | 0.00 |
| ATOM | 560 | C6   | RA | 18 | -0.978  | 14.822 | 4.313  | 0.00 | 0.00 |
| ATOM | 561 | N6   | RA | 18 | -0.701  | 15.105 | 3.069  | 0.00 | 0.00 |
| ATOM | 562 | H61  | RA | 18 | 0.241   | 15.065 | 2.765  | 0.00 | 0.00 |
| ATOM | 563 | H62  | RA | 18 | -1.438  | 15.350 | 2.463  | 0.00 | 0.00 |
| ATOM | 564 | N1   | RA | 18 | 0.092   | 14.497 | 5.020  | 0.00 | 0.00 |
| ATOM | 565 | C2   | RA | 18 | -0.088  | 14.163 | 6.278  | 0.00 | 0.00 |
| ATOM | 566 | H2   | RA | 18 | 0.794   | 13.906 | 6.819  | 0.00 | 0.00 |
| ATOM | 567 | N3   | RA | 18 | -1.219  | 14.104 | 6.955  | 0.00 | 0.00 |
| ATOM | 568 | C4   | RA | 18 | -2.287  | 14.444 | 6.194  | 0.00 | 0.00 |
| ATOM | 569 | C3'  | RA | 18 | -5.458  | 15.826 | 8.739  | 0.00 | 0.00 |
| ATOM | 570 | H3'  | RA | 18 | -5.546  | 16.369 | 7.821  | 0.00 | 0.00 |
| ATOM | 571 | C2'  | RA | 18 | -4.062  | 15.267 | 8.865  | 0.00 | 0.00 |
| ATOM | 572 | 1H2' | RA | 18 | -3.330  | 15.983 | 8.560  | 0.00 | 0.00 |
| ATOM | 573 | O2'  | RA | 18 | -3.790  | 14.794 | 10.142 | 0.00 | 0.00 |
| ATOM | 574 | 2HO' | RA | 18 | -3.954  | 15.205 | 10.642 | 0.00 | 0.00 |
| ATOM | 575 | O3'  | RA | 18 | -5.831  | 16.613 | 9.839  | 0.00 | 0.00 |
| ATOM | 576 | P    | RG | 19 | -5.519  | 18.135 | 9.894  | 0.00 | 0.00 |
| ATOM | 577 | O1P  | RG | 19 | -6.163  | 18.652 | 11.085 | 0.00 | 0.00 |
| ATOM | 578 | O2P  | RG | 19 | -5.841  | 18.715 | 8.609  | 0.00 | 0.00 |
| ATOM | 579 | O5'  | RG | 19 | -3.963  | 18.245 | 10.083 | 0.00 | 0.00 |
| ATOM | 580 | C5'  | RG | 19 | -3.352  | 17.999 | 11.317 | 0.00 | 0.00 |
| ATOM | 581 | 1H5' | RG | 19 | -3.651  | 17.045 | 11.693 | 0.00 | 0.00 |
| ATOM | 582 | 2H5' | RG | 19 | -3.659  | 18.737 | 12.016 | 0.00 | 0.00 |
| ATOM | 583 | C4'  | RG | 19 | -1.843  | 18.028 | 11.223 | 0.00 | 0.00 |
| ATOM | 584 | H4'  | RG | 19 | -1.437  | 17.750 | 12.173 | 0.00 | 0.00 |
| ATOM | 585 | O4'  | RG | 19 | -1.360  | 17.129 | 10.254 | 0.00 | 0.00 |
| ATOM | 586 | C1'  | RG | 19 | -0.208  | 17.668 | 9.645  | 0.00 | 0.00 |
| ATOM | 587 | H1'  | RG | 19 | 0.634   | 17.023 | 9.785  | 0.00 | 0.00 |
| ATOM | 588 | N9   | RG | 19 | -0.392  | 17.831 | 8.192  | 0.00 | 0.00 |
| ATOM | 589 | C8   | RG | 19 | -1.542  | 17.907 | 7.480  | 0.00 | 0.00 |
| ATOM | 590 | H8   | RG | 19 | -2.502  | 17.881 | 7.938  | 0.00 | 0.00 |
| ATOM | 591 | N7   | RG | 19 | -1.375  | 17.985 | 6.200  | 0.00 | 0.00 |
| ATOM | 592 | C5   | RG | 19 | 0.005   | 18.002 | 6.053  | 0.00 | 0.00 |
| ATOM | 593 | C6   | RG | 19 | 0.833   | 18.095 | 4.897  | 0.00 | 0.00 |
| ATOM | 594 | O6   | RG | 19 | 0.519   | 18.141 | 3.719  | 0.00 | 0.00 |
| ATOM | 595 | N1   | RG | 19 | 2.169   | 18.170 | 5.193  | 0.00 | 0.00 |
| ATOM | 596 | H1   | RG | 19 | 2.794   | 18.311 | 4.435  | 0.00 | 0.00 |
| ATOM | 597 | C2   | RG | 19 | 2.665   | 18.120 | 6.437  | 0.00 | 0.00 |
| ATOM | 598 | N2   | RG | 19 | 3.939   | 18.250 | 6.562  | 0.00 | 0.00 |
| ATOM | 599 | H21  | RG | 19 | 4.492   | 18.448 | 5.766  | 0.00 | 0.00 |
| ATOM | 600 | H22  | RG | 19 | 4.329   | 18.275 | 7.464  | 0.00 | 0.00 |
| ATOM | 601 | N3   | RG | 19 | 1.944   | 17.997 | 7.531  | 0.00 | 0.00 |
| ATOM | 602 | C4   | RG | 19 | 0.613   | 17.942 | 7.275  | 0.00 | 0.00 |
| ATOM | 603 | C3'  | RG | 19 | -1.288  | 19.383 | 10.852 | 0.00 | 0.00 |
| ATOM | 604 | H3'  | RG | 19 | -1.872  | 19.803 | 10.061 | 0.00 | 0.00 |
| ATOM | 605 | C2'  | RG | 19 | 0.072   | 18.989 | 10.324 | 0.00 | 0.00 |



|      |     |      |    |    |        |        |        |      |      |
|------|-----|------|----|----|--------|--------|--------|------|------|
| ATOM | 606 | 1H2' | RG | 19 | 0.440  | 19.720 | 9.637  | 0.00 | 0.00 |
| ATOM | 607 | O2'  | RG | 19 | 0.992  | 18.779 | 11.357 | 0.00 | 0.00 |
| ATOM | 608 | 2HO' | RG | 19 | 1.054  | 19.233 | 11.763 | 0.00 | 0.00 |
| ATOM | 609 | O3'  | RG | 19 | -1.221 | 20.252 | 11.949 | 0.00 | 0.00 |
| ATOM | 610 | P    | RC | 20 | -1.260 | 21.809 | 11.770 | 0.00 | 0.00 |
| ATOM | 611 | O1P  | RC | 20 | -1.280 | 22.385 | 13.105 | 0.00 | 0.00 |
| ATOM | 612 | O2P  | RC | 20 | -2.325 | 22.145 | 10.846 | 0.00 | 0.00 |
| ATOM | 613 | O5'  | RC | 20 | 0.107  | 22.184 | 11.082 | 0.00 | 0.00 |
| ATOM | 614 | C5'  | RC | 20 | 1.310  | 22.244 | 11.805 | 0.00 | 0.00 |
| ATOM | 615 | 1H5' | RC | 20 | 1.448  | 21.336 | 12.352 | 0.00 | 0.00 |
| ATOM | 616 | 2H5' | RC | 20 | 1.268  | 23.061 | 12.494 | 0.00 | 0.00 |
| ATOM | 617 | C4'  | RC | 20 | 2.505  | 22.449 | 10.889 | 0.00 | 0.00 |
| ATOM | 618 | H4'  | RC | 20 | 3.388  | 22.450 | 11.502 | 0.00 | 0.00 |
| ATOM | 619 | O4'  | RC | 20 | 2.617  | 21.407 | 9.933  | 0.00 | 0.00 |
| ATOM | 620 | C1'  | RC | 20 | 3.195  | 21.930 | 8.755  | 0.00 | 0.00 |
| ATOM | 621 | H1'  | RC | 20 | 4.114  | 21.410 | 8.547  | 0.00 | 0.00 |
| ATOM | 622 | N1   | RC | 20 | 2.301  | 21.786 | 7.574  | 0.00 | 0.00 |
| ATOM | 623 | C6   | RC | 20 | 0.944  | 21.730 | 7.686  | 0.00 | 0.00 |
| ATOM | 624 | H6   | RC | 20 | 0.492  | 21.785 | 8.645  | 0.00 | 0.00 |
| ATOM | 625 | C5   | RC | 20 | 0.179  | 21.591 | 6.593  | 0.00 | 0.00 |
| ATOM | 626 | H5   | RC | 20 | -0.880 | 21.529 | 6.678  | 0.00 | 0.00 |
| ATOM | 627 | C4   | RC | 20 | 0.826  | 21.530 | 5.359  | 0.00 | 0.00 |
| ATOM | 628 | N4   | RC | 20 | 0.141  | 21.374 | 4.283  | 0.00 | 0.00 |
| ATOM | 629 | H41  | RC | 20 | 0.637  | 21.295 | 3.444  | 0.00 | 0.00 |
| ATOM | 630 | H42  | RC | 20 | -0.834 | 21.274 | 4.335  | 0.00 | 0.00 |
| ATOM | 631 | N3   | RC | 20 | 2.116  | 21.608 | 5.222  | 0.00 | 0.00 |
| ATOM | 632 | C2   | RC | 20 | 2.873  | 21.754 | 6.312  | 0.00 | 0.00 |
| ATOM | 633 | O2   | RC | 20 | 4.059  | 21.891 | 6.141  | 0.00 | 0.00 |
| ATOM | 634 | C3'  | RC | 20 | 2.478  | 23.736 | 10.102 | 0.00 | 0.00 |
| ATOM | 635 | H3'  | RC | 20 | 1.510  | 23.873 | 9.653  | 0.00 | 0.00 |
| ATOM | 636 | C2'  | RC | 20 | 3.497  | 23.392 | 9.031  | 0.00 | 0.00 |
| ATOM | 637 | 1H2' | RC | 20 | 3.357  | 23.996 | 8.155  | 0.00 | 0.00 |
| ATOM | 638 | O2'  | RC | 20 | 4.826  | 23.478 | 9.489  | 0.00 | 0.00 |
| ATOM | 639 | 2HO' | RC | 20 | 5.016  | 24.035 | 9.652  | 0.00 | 0.00 |
| ATOM | 640 | O3'  | RC | 20 | 2.852  | 24.865 | 10.865 | 0.00 | 0.00 |
| ATOM | 641 | P    | RA | 21 | 2.419  | 26.309 | 10.426 | 0.00 | 0.00 |
| ATOM | 642 | O1P  | RA | 21 | 2.862  | 27.237 | 11.460 | 0.00 | 0.00 |
| ATOM | 643 | O2P  | RA | 21 | 1.003  | 26.273 | 10.091 | 0.00 | 0.00 |
| ATOM | 644 | O5'  | RA | 21 | 3.210  | 26.611 | 9.104  | 0.00 | 0.00 |
| ATOM | 645 | C5'  | RA | 21 | 4.578  | 26.935 | 9.117  | 0.00 | 0.00 |
| ATOM | 646 | 1H5' | RA | 21 | 5.125  | 26.182 | 9.641  | 0.00 | 0.00 |
| ATOM | 647 | 2H5' | RA | 21 | 4.714  | 27.866 | 9.622  | 0.00 | 0.00 |
| ATOM | 648 | C4'  | RA | 21 | 5.136  | 27.047 | 7.716  | 0.00 | 0.00 |
| ATOM | 649 | H4'  | RA | 21 | 6.185  | 27.277 | 7.796  | 0.00 | 0.00 |
| ATOM | 650 | O4'  | RA | 21 | 5.009  | 25.847 | 6.979  | 0.00 | 0.00 |
| ATOM | 651 | C1'  | RA | 21 | 4.800  | 26.171 | 5.617  | 0.00 | 0.00 |
| ATOM | 652 | H1'  | RA | 21 | 5.545  | 25.701 | 5.010  | 0.00 | 0.00 |
| ATOM | 653 | N9   | RA | 21 | 3.475  | 25.715 | 5.164  | 0.00 | 0.00 |
| ATOM | 654 | C8   | RA | 21 | 2.371  | 25.422 | 5.898  | 0.00 | 0.00 |
| ATOM | 655 | H8   | RA | 21 | 2.342  | 25.555 | 6.954  | 0.00 | 0.00 |
| ATOM | 656 | N7   | RA | 21 | 1.364  | 24.991 | 5.209  | 0.00 | 0.00 |
| ATOM | 657 | C5   | RA | 21 | 1.844  | 25.017 | 3.901  | 0.00 | 0.00 |
| ATOM | 658 | C6   | RA | 21 | 1.324  | 24.676 | 2.640  | 0.00 | 0.00 |
| ATOM | 659 | N6   | RA | 21 | 0.136  | 24.196 | 2.415  | 0.00 | 0.00 |
| ATOM | 660 | H61  | RA | 21 | -0.102 | 23.938 | 1.490  | 0.00 | 0.00 |
| ATOM | 661 | H62  | RA | 21 | -0.461 | 24.009 | 3.174  | 0.00 | 0.00 |
| ATOM | 662 | N1   | RA | 21 | 2.033  | 24.846 | 1.539  | 0.00 | 0.00 |
| ATOM | 663 | C2   | RA | 21 | 3.243  | 25.330 | 1.657  | 0.00 | 0.00 |
| ATOM | 664 | H2   | RA | 21 | 3.781  | 25.458 | 0.754  | 0.00 | 0.00 |
| ATOM | 665 | N3   | RA | 21 | 3.867  | 25.699 | 2.758  | 0.00 | 0.00 |
| ATOM | 666 | C4   | RA | 21 | 3.114  | 25.495 | 3.862  | 0.00 | 0.00 |
| ATOM | 667 | C3'  | RA | 21 | 4.483  | 28.123 | 6.876  | 0.00 | 0.00 |
| ATOM | 668 | H3'  | RA | 21 | 3.414  | 28.032 | 6.966  | 0.00 | 0.00 |
| ATOM | 669 | C2'  | RA | 21 | 4.916  | 27.672 | 5.499  | 0.00 | 0.00 |
| ATOM | 670 | 1H2' | RA | 21 | 4.264  | 28.053 | 4.736  | 0.00 | 0.00 |
| ATOM | 671 | O2'  | RA | 21 | 6.248  | 27.997 | 5.212  | 0.00 | 0.00 |
| ATOM | 672 | 2HO' | RA | 21 | 6.409  | 28.614 | 5.359  | 0.00 | 0.00 |
| ATOM | 673 | O3'  | RA | 21 | 4.916  | 29.417 | 7.211  | 0.00 | 0.00 |

|      |     |      |     |    |        |        |        |      |      |
|------|-----|------|-----|----|--------|--------|--------|------|------|
| ATOM | 674 | P    | RA  | 22 | 4.065  | 30.677 | 6.830  | 0.00 | 0.00 |
| ATOM | 675 | O1P  | RA  | 22 | 4.721  | 31.843 | 7.408  | 0.00 | 0.00 |
| ATOM | 676 | O2P  | RA  | 22 | 2.682  | 30.414 | 7.177  | 0.00 | 0.00 |
| ATOM | 677 | O5'  | RA  | 22 | 4.125  | 30.792 | 5.263  | 0.00 | 0.00 |
| ATOM | 678 | C5'  | RA  | 22 | 5.266  | 31.243 | 4.618  | 0.00 | 0.00 |
| ATOM | 679 | 1H5' | RA  | 22 | 6.114  | 30.691 | 4.934  | 0.00 | 0.00 |
| ATOM | 680 | 2H5' | RA  | 22 | 5.450  | 32.262 | 4.861  | 0.00 | 0.00 |
| ATOM | 681 | C4'  | RA  | 22 | 5.129  | 31.117 | 3.124  | 0.00 | 0.00 |
| ATOM | 682 | H4'  | RA  | 22 | 6.038  | 31.443 | 2.707  | 0.00 | 0.00 |
| ATOM | 683 | O4'  | RA  | 22 | 4.885  | 29.811 | 2.702  | 0.00 | 0.00 |
| ATOM | 684 | C1'  | RA  | 22 | 4.051  | 29.820 | 1.558  | 0.00 | 0.00 |
| ATOM | 685 | H1'  | RA  | 22 | 4.499  | 29.301 | 0.754  | 0.00 | 0.00 |
| ATOM | 686 | N9   | RA  | 22 | 2.783  | 29.174 | 1.820  | 0.00 | 0.00 |
| ATOM | 687 | C8   | RA  | 22 | 2.156  | 28.973 | 2.997  | 0.00 | 0.00 |
| ATOM | 688 | H8   | RA  | 22 | 2.558  | 29.311 | 3.924  | 0.00 | 0.00 |
| ATOM | 689 | N7   | RA  | 22 | 1.036  | 28.336 | 2.896  | 0.00 | 0.00 |
| ATOM | 690 | C5   | RA  | 22 | 0.903  | 28.121 | 1.533  | 0.00 | 0.00 |
| ATOM | 691 | C6   | RA  | 22 | -0.035 | 27.498 | 0.694  | 0.00 | 0.00 |
| ATOM | 692 | N6   | RA  | 22 | -1.112 | 26.904 | 1.088  | 0.00 | 0.00 |
| ATOM | 693 | H61  | RA  | 22 | -1.690 | 26.463 | 0.414  | 0.00 | 0.00 |
| ATOM | 694 | H62  | RA  | 22 | -1.282 | 26.851 | 2.054  | 0.00 | 0.00 |
| ATOM | 695 | N1   | RA  | 22 | 0.115  | 27.475 | -0.618 | 0.00 | 0.00 |
| ATOM | 696 | C2   | RA  | 22 | 1.185  | 28.025 | -1.105 | 0.00 | 0.00 |
| ATOM | 697 | H2   | RA  | 22 | 1.276  | 27.984 | -2.157 | 0.00 | 0.00 |
| ATOM | 698 | N3   | RA  | 22 | 2.166  | 28.615 | -0.455 | 0.00 | 0.00 |
| ATOM | 699 | C4   | RA  | 22 | 1.961  | 28.631 | 0.873  | 0.00 | 0.00 |
| ATOM | 700 | C3'  | RA  | 22 | 4.034  | 31.917 | 2.528  | 0.00 | 0.00 |
| ATOM | 701 | H3'  | RA  | 22 | 3.157  | 31.775 | 3.078  | 0.00 | 0.00 |
| ATOM | 702 | C2'  | RA  | 22 | 3.859  | 31.235 | 1.196  | 0.00 | 0.00 |
| ATOM | 703 | 1H2' | RA  | 22 | 2.901  | 31.400 | 0.764  | 0.00 | 0.00 |
| ATOM | 704 | O2'  | RA  | 22 | 4.846  | 31.580 | 0.319  | 0.00 | 0.00 |
| ATOM | 705 | 2HO' | RA  | 22 | 5.062  | 32.278 | 0.409  | 0.00 | 0.00 |
| ATOM | 706 | O3'  | RA  | 22 | 4.378  | 33.235 | 2.425  | 0.00 | 0.00 |
| ATOM | 707 | P    | RG3 | 23 | 3.308  | 34.295 | 2.411  | 0.00 | 0.00 |
| ATOM | 708 | O1P  | RG3 | 23 | 3.973  | 35.538 | 2.348  | 0.00 | 0.00 |
| ATOM | 709 | O2P  | RG3 | 23 | 2.443  | 34.061 | 3.480  | 0.00 | 0.00 |
| ATOM | 710 | O5'  | RG3 | 23 | 2.513  | 34.042 | 1.087  | 0.00 | 0.00 |
| ATOM | 711 | C5'  | RG3 | 23 | 3.017  | 34.407 | -0.137 | 0.00 | 0.00 |
| ATOM | 712 | 1H5' | RG3 | 23 | 3.958  | 33.974 | -0.270 | 0.00 | 0.00 |
| ATOM | 713 | 2H5' | RG3 | 23 | 3.131  | 35.445 | -0.161 | 0.00 | 0.00 |
| ATOM | 714 | C4'  | RG3 | 23 | 2.123  | 33.974 | -1.279 | 0.00 | 0.00 |
| ATOM | 715 | H4'  | RG3 | 23 | 2.568  | 34.271 | -2.174 | 0.00 | 0.00 |
| ATOM | 716 | O4'  | RG3 | 23 | 1.921  | 32.622 | -1.337 | 0.00 | 0.00 |
| ATOM | 717 | C1'  | RG3 | 23 | 0.637  | 32.349 | -1.816 | 0.00 | 0.00 |
| ATOM | 718 | H1'  | RG3 | 23 | 0.659  | 31.783 | -2.707 | 0.00 | 0.00 |
| ATOM | 719 | N9   | RG3 | 23 | -0.128 | 31.618 | -0.848 | 0.00 | 0.00 |
| ATOM | 720 | C8   | RG3 | 23 | -0.038 | 31.639 | 0.494  | 0.00 | 0.00 |
| ATOM | 721 | H8   | RG3 | 23 | 0.686  | 32.202 | 1.019  | 0.00 | 0.00 |
| ATOM | 722 | N7   | RG3 | 23 | -0.925 | 30.938 | 1.076  | 0.00 | 0.00 |
| ATOM | 723 | C5   | RG3 | 23 | -1.666 | 30.414 | 0.035  | 0.00 | 0.00 |
| ATOM | 724 | C6   | RG3 | 23 | -2.816 | 29.596 | 0.010  | 0.00 | 0.00 |
| ATOM | 725 | O6   | RG3 | 23 | -3.423 | 29.130 | 0.938  | 0.00 | 0.00 |
| ATOM | 726 | N1   | RG3 | 23 | -3.284 | 29.340 | -1.240 | 0.00 | 0.00 |
| ATOM | 727 | H1   | RG3 | 23 | -4.089 | 28.783 | -1.329 | 0.00 | 0.00 |
| ATOM | 728 | C2   | RG3 | 23 | -2.732 | 29.804 | -2.340 | 0.00 | 0.00 |
| ATOM | 729 | N2   | RG3 | 23 | -3.318 | 29.536 | -3.453 | 0.00 | 0.00 |
| ATOM | 730 | H21  | RG3 | 23 | -4.194 | 29.092 | -3.467 | 0.00 | 0.00 |
| ATOM | 731 | H22  | RG3 | 23 | -2.932 | 29.917 | -4.257 | 0.00 | 0.00 |
| ATOM | 732 | N3   | RG3 | 23 | -1.672 | 30.554 | -2.374 | 0.00 | 0.00 |
| ATOM | 733 | C4   | RG3 | 23 | -1.181 | 30.829 | -1.147 | 0.00 | 0.00 |
| ATOM | 734 | C3'  | RG3 | 23 | 0.784  | 34.575 | -1.249 | 0.00 | 0.00 |
| ATOM | 735 | H3'  | RG3 | 23 | 0.436  | 34.569 | -0.265 | 0.00 | 0.00 |
| ATOM | 736 | C2'  | RG3 | 23 | -0.014 | 33.634 | -2.107 | 0.00 | 0.00 |
| ATOM | 737 | 1H2' | RG3 | 23 | -1.018 | 33.622 | -1.834 | 0.00 | 0.00 |
| ATOM | 738 | O2'  | RG3 | 23 | 0.101  | 33.906 | -3.455 | 0.00 | 0.00 |
| ATOM | 739 | 2HO' | RG3 | 23 | -0.105 | 34.102 | -3.723 | 0.00 | 0.00 |
| ATOM | 740 | O3'  | RG3 | 23 | 0.747  | 35.831 | -1.759 | 0.00 | 0.00 |
| ATOM | 741 | H3T  | RG3 | 23 | 0.404  | 35.882 | -2.098 | 0.00 | 0.00 |

|      |     |      |     |    |        |         |         |      |      |
|------|-----|------|-----|----|--------|---------|---------|------|------|
| ATOM | 742 | H5T  | RC5 | 24 | 11.967 | -22.885 | -11.527 | 0.00 | 0.00 |
| ATOM | 743 | O5'  | RC5 | 24 | 11.628 | -22.777 | -11.567 | 0.00 | 0.00 |
| ATOM | 744 | C5'  | RC5 | 24 | 10.699 | -21.829 | -11.268 | 0.00 | 0.00 |
| ATOM | 745 | 1H5' | RC5 | 24 | 10.810 | -21.023 | -11.911 | 0.00 | 0.00 |
| ATOM | 746 | 2H5' | RC5 | 24 | 10.856 | -21.501 | -10.304 | 0.00 | 0.00 |
| ATOM | 747 | C4'  | RC5 | 24 | 9.329  | -22.358 | -11.401 | 0.00 | 0.00 |
| ATOM | 748 | H4'  | RC5 | 24 | 9.213  | -22.770 | -12.354 | 0.00 | 0.00 |
| ATOM | 749 | O4'  | RC5 | 24 | 9.117  | -23.318 | -10.424 | 0.00 | 0.00 |
| ATOM | 750 | C1'  | RC5 | 24 | 8.041  | -22.952 | -9.636  | 0.00 | 0.00 |
| ATOM | 751 | H1'  | RC5 | 24 | 7.165  | -23.312 | -10.105 | 0.00 | 0.00 |
| ATOM | 752 | N1   | RC5 | 24 | 8.133  | -23.539 | -8.297  | 0.00 | 0.00 |
| ATOM | 753 | C6   | RC5 | 24 | 8.591  | -22.864 | -7.241  | 0.00 | 0.00 |
| ATOM | 754 | H6   | RC5 | 24 | 8.958  | -21.899 | -7.371  | 0.00 | 0.00 |
| ATOM | 755 | C5   | RC5 | 24 | 8.589  | -23.409 | -6.031  | 0.00 | 0.00 |
| ATOM | 756 | H5   | RC5 | 24 | 8.941  | -22.877 | -5.209  | 0.00 | 0.00 |
| ATOM | 757 | C4   | RC5 | 24 | 8.095  | -24.682 | -5.904  | 0.00 | 0.00 |
| ATOM | 758 | N4   | RC5 | 24 | 8.044  | -25.253 | -4.771  | 0.00 | 0.00 |
| ATOM | 759 | H41  | RC5 | 24 | 7.611  | -26.116 | -4.724  | 0.00 | 0.00 |
| ATOM | 760 | H42  | RC5 | 24 | 8.338  | -24.791 | -3.982  | 0.00 | 0.00 |
| ATOM | 761 | N3   | RC5 | 24 | 7.637  | -25.350 | -6.900  | 0.00 | 0.00 |
| ATOM | 762 | C2   | RC5 | 24 | 7.641  | -24.796 | -8.104  | 0.00 | 0.00 |
| ATOM | 763 | O2   | RC5 | 24 | 7.178  | -25.438 | -9.002  | 0.00 | 0.00 |
| ATOM | 764 | C3'  | RC5 | 24 | 8.293  | -21.297 | -11.215 | 0.00 | 0.00 |
| ATOM | 765 | H3'  | RC5 | 24 | 8.675  | -20.330 | -11.425 | 0.00 | 0.00 |
| ATOM | 766 | C2'  | RC5 | 24 | 8.006  | -21.468 | -9.745  | 0.00 | 0.00 |
| ATOM | 767 | 1H2' | RC5 | 24 | 8.811  | -21.038 | -9.208  | 0.00 | 0.00 |
| ATOM | 768 | O2'  | RC5 | 24 | 6.822  | -20.935 | -9.301  | 0.00 | 0.00 |
| ATOM | 769 | 2HO' | RC5 | 24 | 6.470  | -20.425 | -9.974  | 0.00 | 0.00 |
| ATOM | 770 | O3'  | RC5 | 24 | 7.222  | -21.602 | -12.042 | 0.00 | 0.00 |
| ATOM | 771 | P    | RU  | 25 | 6.098  | -20.625 | -12.400 | 0.00 | 0.00 |
| ATOM | 772 | O1P  | RU  | 25 | 6.232  | -20.332 | -13.767 | 0.00 | 0.00 |
| ATOM | 773 | O2P  | RU  | 25 | 6.064  | -19.554 | -11.436 | 0.00 | 0.00 |
| ATOM | 774 | O5'  | RU  | 25 | 4.854  | -21.459 | -12.179 | 0.00 | 0.00 |
| ATOM | 775 | C5'  | RU  | 25 | 4.455  | -22.423 | -13.084 | 0.00 | 0.00 |
| ATOM | 776 | 1H5' | RU  | 25 | 5.298  | -22.932 | -13.462 | 0.00 | 0.00 |
| ATOM | 777 | 2H5' | RU  | 25 | 3.965  | -21.957 | -13.891 | 0.00 | 0.00 |
| ATOM | 778 | C4'  | RU  | 25 | 3.525  | -23.429 | -12.483 | 0.00 | 0.00 |
| ATOM | 779 | H4'  | RU  | 25 | 3.179  | -24.070 | -13.261 | 0.00 | 0.00 |
| ATOM | 780 | O4'  | RU  | 25 | 4.176  | -24.211 | -11.528 | 0.00 | 0.00 |
| ATOM | 781 | C1'  | RU  | 25 | 3.227  | -24.670 | -10.608 | 0.00 | 0.00 |
| ATOM | 782 | H1'  | RU  | 25 | 3.137  | -25.731 | -10.688 | 0.00 | 0.00 |
| ATOM | 783 | N1   | RU  | 25 | 3.615  | -24.340 | -9.231  | 0.00 | 0.00 |
| ATOM | 784 | C6   | RU  | 25 | 4.384  | -23.274 | -8.924  | 0.00 | 0.00 |
| ATOM | 785 | H6   | RU  | 25 | 4.701  | -22.623 | -9.693  | 0.00 | 0.00 |
| ATOM | 786 | C5   | RU  | 25 | 4.763  | -23.056 | -7.664  | 0.00 | 0.00 |
| ATOM | 787 | H5   | RU  | 25 | 5.379  | -22.229 | -7.436  | 0.00 | 0.00 |
| ATOM | 788 | C4   | RU  | 25 | 4.390  | -23.923 | -6.610  | 0.00 | 0.00 |
| ATOM | 789 | O4   | RU  | 25 | 4.743  | -23.844 | -5.467  | 0.00 | 0.00 |
| ATOM | 790 | N3   | RU  | 25 | 3.574  | -24.917 | -6.983  | 0.00 | 0.00 |
| ATOM | 791 | H3   | RU  | 25 | 3.252  | -25.516 | -6.274  | 0.00 | 0.00 |
| ATOM | 792 | C2   | RU  | 25 | 3.148  | -25.161 | -8.233  | 0.00 | 0.00 |
| ATOM | 793 | O2   | RU  | 25 | 2.377  | -26.064 | -8.417  | 0.00 | 0.00 |
| ATOM | 794 | C3'  | RU  | 25 | 2.331  | -22.857 | -11.789 | 0.00 | 0.00 |
| ATOM | 795 | H3'  | RU  | 25 | 2.647  | -22.075 | -11.136 | 0.00 | 0.00 |
| ATOM | 796 | C2'  | RU  | 25 | 1.911  | -24.051 | -10.977 | 0.00 | 0.00 |
| ATOM | 797 | 1H2' | RU  | 25 | 1.367  | -23.755 | -10.118 | 0.00 | 0.00 |
| ATOM | 798 | O2'  | RU  | 25 | 1.196  | -24.975 | -11.736 | 0.00 | 0.00 |
| ATOM | 799 | 2HO' | RU  | 25 | 0.705  | -24.623 | -12.183 | 0.00 | 0.00 |
| ATOM | 800 | O3'  | RU  | 25 | 1.334  | -22.418 | -12.659 | 0.00 | 0.00 |
| ATOM | 801 | P    | RU  | 26 | 0.299  | -21.329 | -12.216 | 0.00 | 0.00 |
| ATOM | 802 | O1P  | RU  | 26 | -0.591 | -21.113 | -13.324 | 0.00 | 0.00 |
| ATOM | 803 | O2P  | RU  | 26 | 1.030  | -20.201 | -11.680 | 0.00 | 0.00 |
| ATOM | 804 | O5'  | RU  | 26 | -0.516 | -21.974 | -11.054 | 0.00 | 0.00 |
| ATOM | 805 | C5'  | RU  | 26 | -1.500 | -22.934 | -11.282 | 0.00 | 0.00 |
| ATOM | 806 | 1H5' | RU  | 26 | -1.095 | -23.718 | -11.883 | 0.00 | 0.00 |
| ATOM | 807 | 2H5' | RU  | 26 | -2.308 | -22.498 | -11.810 | 0.00 | 0.00 |
| ATOM | 808 | C4'  | RU  | 26 | -2.049 | -23.511 | -10.012 | 0.00 | 0.00 |
| ATOM | 809 | H4'  | RU  | 26 | -2.787 | -24.241 | -10.266 | 0.00 | 0.00 |

|      |     |      |    |    |        |         |        |      |      |
|------|-----|------|----|----|--------|---------|--------|------|------|
| ATOM | 810 | O4'  | RU | 26 | -1.054 | -24.117 | -9.240 | 0.00 | 0.00 |
| ATOM | 811 | C1'  | RU | 26 | -1.485 | -24.119 | -7.903 | 0.00 | 0.00 |
| ATOM | 812 | H1'  | RU | 26 | -1.772 | -25.118 | -7.628 | 0.00 | 0.00 |
| ATOM | 813 | N1   | RU | 26 | -0.434 | -23.634 | -6.982 | 0.00 | 0.00 |
| ATOM | 814 | C6   | RU | 26 | 0.416  | -22.627 | -7.307 | 0.00 | 0.00 |
| ATOM | 815 | H6   | RU | 26 | 0.350  | -22.193 | -8.270 | 0.00 | 0.00 |
| ATOM | 816 | C5   | RU | 26 | 1.321  | -22.170 | -6.430 | 0.00 | 0.00 |
| ATOM | 817 | H5   | RU | 26 | 1.984  | -21.387 | -6.704 | 0.00 | 0.00 |
| ATOM | 818 | C4   | RU | 26 | 1.440  | -22.713 | -5.126 | 0.00 | 0.00 |
| ATOM | 819 | O4   | RU | 26 | 2.233  | -22.368 | -4.276 | 0.00 | 0.00 |
| ATOM | 820 | N3   | RU | 26 | 0.561  | -23.707 | -4.873 | 0.00 | 0.00 |
| ATOM | 821 | H3   | RU | 26 | 0.579  | -24.095 | -3.969 | 0.00 | 0.00 |
| ATOM | 822 | C2   | RU | 26 | -0.387 | -24.185 | -5.724 | 0.00 | 0.00 |
| ATOM | 823 | O2   | RU | 26 | -1.144 | -25.050 | -5.344 | 0.00 | 0.00 |
| ATOM | 824 | C3'  | RU | 26 | -2.702 | -22.489 | -9.124 | 0.00 | 0.00 |
| ATOM | 825 | H3'  | RU | 26 | -2.055 | -21.639 | -9.035 | 0.00 | 0.00 |
| ATOM | 826 | C2'  | RU | 26 | -2.722 | -23.251 | -7.819 | 0.00 | 0.00 |
| ATOM | 827 | 1H2' | RU | 26 | -2.661 | -22.570 | -6.998 | 0.00 | 0.00 |
| ATOM | 828 | O2'  | RU | 26 | -3.837 | -24.083 | -7.697 | 0.00 | 0.00 |
| ATOM | 829 | 2HO' | RU | 26 | -4.552 | -23.555 | -7.616 | 0.00 | 0.00 |
| ATOM | 830 | O3'  | RU | 26 | -3.966 | -22.112 | -9.587 | 0.00 | 0.00 |
| ATOM | 831 | P    | RG | 27 | -4.781 | -20.952 | -8.920 | 0.00 | 0.00 |
| ATOM | 832 | O1P  | RG | 27 | -5.957 | -20.743 | -9.729 | 0.00 | 0.00 |
| ATOM | 833 | O2P  | RG | 27 | -3.889 | -19.834 | -8.664 | 0.00 | 0.00 |
| ATOM | 834 | O5'  | RG | 27 | -5.243 | -21.573 | -7.557 | 0.00 | 0.00 |
| ATOM | 835 | C5'  | RG | 27 | -5.250 | -20.853 | -6.367 | 0.00 | 0.00 |
| ATOM | 836 | 1H5' | RG | 27 | -6.009 | -20.119 | -6.405 | 0.00 | 0.00 |
| ATOM | 837 | 2H5' | RG | 27 | -4.312 | -20.376 | -6.228 | 0.00 | 0.00 |
| ATOM | 838 | C4'  | RG | 27 | -5.503 | -21.780 | -5.197 | 0.00 | 0.00 |
| ATOM | 839 | H4'  | RG | 27 | -6.379 | -22.366 | -5.390 | 0.00 | 0.00 |
| ATOM | 840 | O4'  | RG | 27 | -4.419 | -22.645 | -4.993 | 0.00 | 0.00 |
| ATOM | 841 | C1'  | RG | 27 | -4.152 | -22.767 | -3.613 | 0.00 | 0.00 |
| ATOM | 842 | H1'  | RG | 27 | -4.095 | -23.800 | -3.327 | 0.00 | 0.00 |
| ATOM | 843 | N9   | RG | 27 | -2.864 | -22.126 | -3.278 | 0.00 | 0.00 |
| ATOM | 844 | C8   | RG | 27 | -2.043 | -21.366 | -4.064 | 0.00 | 0.00 |
| ATOM | 845 | H8   | RG | 27 | -2.293 | -21.101 | -5.067 | 0.00 | 0.00 |
| ATOM | 846 | N7   | RG | 27 | -0.953 | -20.977 | -3.488 | 0.00 | 0.00 |
| ATOM | 847 | C5   | RG | 27 | -1.046 | -21.526 | -2.215 | 0.00 | 0.00 |
| ATOM | 848 | C6   | RG | 27 | -0.165 | -21.474 | -1.095 | 0.00 | 0.00 |
| ATOM | 849 | O6   | RG | 27 | 0.925  | -20.936 | -1.003 | 0.00 | 0.00 |
| ATOM | 850 | N1   | RG | 27 | -0.634 | -22.148 | 0.008  | 0.00 | 0.00 |
| ATOM | 851 | H1   | RG | 27 | -0.067 | -22.132 | 0.825  | 0.00 | 0.00 |
| ATOM | 852 | C2   | RG | 27 | -1.803 | -22.807 | 0.042  | 0.00 | 0.00 |
| ATOM | 853 | N2   | RG | 27 | -2.118 | -23.385 | 1.155  | 0.00 | 0.00 |
| ATOM | 854 | H21  | RG | 27 | -1.536 | -23.270 | 1.950  | 0.00 | 0.00 |
| ATOM | 855 | H22  | RG | 27 | -2.967 | -23.891 | 1.199  | 0.00 | 0.00 |
| ATOM | 856 | N3   | RG | 27 | -2.651 | -22.889 | -0.971 | 0.00 | 0.00 |
| ATOM | 857 | C4   | RG | 27 | -2.220 | -22.221 | -2.078 | 0.00 | 0.00 |
| ATOM | 858 | C3'  | RG | 27 | -5.705 | -21.036 | -3.893 | 0.00 | 0.00 |
| ATOM | 859 | H3'  | RG | 27 | -5.000 | -20.228 | -3.838 | 0.00 | 0.00 |
| ATOM | 860 | C2'  | RG | 27 | -5.319 | -22.111 | -2.896 | 0.00 | 0.00 |
| ATOM | 861 | 1H2' | RG | 27 | -5.032 | -21.683 | -1.954 | 0.00 | 0.00 |
| ATOM | 862 | O2'  | RG | 27 | -6.329 | -23.079 | -2.718 | 0.00 | 0.00 |
| ATOM | 863 | 2HO' | RG | 27 | -6.484 | -23.206 | -2.126 | 0.00 | 0.00 |
| ATOM | 864 | O3'  | RG | 27 | -7.021 | -20.587 | -3.723 | 0.00 | 0.00 |
| ATOM | 865 | P    | RC | 28 | -7.337 | -19.301 | -2.890 | 0.00 | 0.00 |
| ATOM | 866 | O1P  | RC | 28 | -8.775 | -19.112 | -2.928 | 0.00 | 0.00 |
| ATOM | 867 | O2P  | RC | 28 | -6.477 | -18.233 | -3.370 | 0.00 | 0.00 |
| ATOM | 868 | O5'  | RC | 28 | -6.924 | -19.642 | -1.414 | 0.00 | 0.00 |
| ATOM | 869 | C5'  | RC | 28 | -7.669 | -20.534 | -0.624 | 0.00 | 0.00 |
| ATOM | 870 | 1H5' | RC | 28 | -7.772 | -21.462 | -1.139 | 0.00 | 0.00 |
| ATOM | 871 | 2H5' | RC | 28 | -8.647 | -20.148 | -0.454 | 0.00 | 0.00 |
| ATOM | 872 | C4'  | RC | 28 | -7.014 | -20.787 | 0.717  | 0.00 | 0.00 |
| ATOM | 873 | H4'  | RC | 28 | -7.634 | -21.472 | 1.266  | 0.00 | 0.00 |
| ATOM | 874 | O4'  | RC | 28 | -5.718 | -21.338 | 0.580  | 0.00 | 0.00 |
| ATOM | 875 | C1'  | RC | 28 | -4.902 | -20.870 | 1.627  | 0.00 | 0.00 |
| ATOM | 876 | H1'  | RC | 28 | -4.544 | -21.715 | 2.183  | 0.00 | 0.00 |
| ATOM | 877 | N1   | RC | 28 | -3.737 | -20.070 | 1.142  | 0.00 | 0.00 |

|      |     |      |    |    |        |         |        |      |      |
|------|-----|------|----|----|--------|---------|--------|------|------|
| ATOM | 878 | C6   | RC | 28 | -3.690 | -19.510 | -0.095 | 0.00 | 0.00 |
| ATOM | 879 | H6   | RC | 28 | -4.510 | -19.625 | -0.764 | 0.00 | 0.00 |
| ATOM | 880 | C5   | RC | 28 | -2.596 | -18.837 | -0.502 | 0.00 | 0.00 |
| ATOM | 881 | H5   | RC | 28 | -2.547 | -18.416 | -1.477 | 0.00 | 0.00 |
| ATOM | 882 | C4   | RC | 28 | -1.533 | -18.734 | 0.402  | 0.00 | 0.00 |
| ATOM | 883 | N4   | RC | 28 | -0.437 | -18.147 | 0.063  | 0.00 | 0.00 |
| ATOM | 884 | H41  | RC | 28 | 0.313  | -18.178 | 0.703  | 0.00 | 0.00 |
| ATOM | 885 | H42  | RC | 28 | -0.353 | -17.771 | -0.838 | 0.00 | 0.00 |
| ATOM | 886 | N3   | RC | 28 | -1.570 | -19.239 | 1.604  | 0.00 | 0.00 |
| ATOM | 887 | C2   | RC | 28 | -2.669 | -19.896 | 2.000  | 0.00 | 0.00 |
| ATOM | 888 | O2   | RC | 28 | -2.687 | -20.335 | 3.133  | 0.00 | 0.00 |
| ATOM | 889 | C3'  | RC | 28 | -6.856 | -19.555 | 1.574  | 0.00 | 0.00 |
| ATOM | 890 | H3'  | RC | 28 | -6.460 | -18.751 | 0.981  | 0.00 | 0.00 |
| ATOM | 891 | C2'  | RC | 28 | -5.790 | -20.032 | 2.533  | 0.00 | 0.00 |
| ATOM | 892 | 1H2' | RC | 28 | -5.265 | -19.196 | 2.960  | 0.00 | 0.00 |
| ATOM | 893 | O2'  | RC | 28 | -6.307 | -20.869 | 3.540  | 0.00 | 0.00 |
| ATOM | 894 | 2HO' | RC | 28 | -6.707 | -20.752 | 3.818  | 0.00 | 0.00 |
| ATOM | 895 | O3'  | RC | 28 | -8.036 | -19.168 | 2.245  | 0.00 | 0.00 |
| ATOM | 896 | P    | RU | 29 | -8.263 | -17.691 | 2.697  | 0.00 | 0.00 |
| ATOM | 897 | O1P  | RU | 29 | -9.551 | -17.624 | 3.363  | 0.00 | 0.00 |
| ATOM | 898 | O2P  | RU | 29 | -8.035 | -16.845 | 1.551  | 0.00 | 0.00 |
| ATOM | 899 | O5'  | RU | 29 | -7.142 | -17.379 | 3.758  | 0.00 | 0.00 |
| ATOM | 900 | C5'  | RU | 29 | -7.205 | -17.913 | 5.053  | 0.00 | 0.00 |
| ATOM | 901 | 1H5' | RU | 29 | -7.332 | -18.975 | 5.020  | 0.00 | 0.00 |
| ATOM | 902 | 2H5' | RU | 29 | -8.067 | -17.510 | 5.544  | 0.00 | 0.00 |
| ATOM | 903 | C4'  | RU | 29 | -5.978 | -17.585 | 5.874  | 0.00 | 0.00 |
| ATOM | 904 | H4'  | RU | 29 | -6.083 | -18.050 | 6.837  | 0.00 | 0.00 |
| ATOM | 905 | O4'  | RU | 29 | -4.787 | -18.078 | 5.296  | 0.00 | 0.00 |
| ATOM | 906 | C1'  | RU | 29 | -3.714 | -17.235 | 5.655  | 0.00 | 0.00 |
| ATOM | 907 | H1'  | RU | 29 | -2.998 | -17.782 | 6.247  | 0.00 | 0.00 |
| ATOM | 908 | N1   | RU | 29 | -2.999 | -16.674 | 4.485  | 0.00 | 0.00 |
| ATOM | 909 | C6   | RU | 29 | -3.599 | -16.533 | 3.265  | 0.00 | 0.00 |
| ATOM | 910 | H6   | RU | 29 | -4.616 | -16.832 | 3.147  | 0.00 | 0.00 |
| ATOM | 911 | C5   | RU | 29 | -2.908 | -16.034 | 2.214  | 0.00 | 0.00 |
| ATOM | 912 | H5   | RU | 29 | -3.359 | -15.938 | 1.255  | 0.00 | 0.00 |
| ATOM | 913 | C4   | RU | 29 | -1.539 | -15.633 | 2.339  | 0.00 | 0.00 |
| ATOM | 914 | O4   | RU | 29 | -0.842 | -15.207 | 1.447  | 0.00 | 0.00 |
| ATOM | 915 | N3   | RU | 29 | -1.035 | -15.758 | 3.587  | 0.00 | 0.00 |
| ATOM | 916 | H3   | RU | 29 | -0.099 | -15.462 | 3.730  | 0.00 | 0.00 |
| ATOM | 917 | C2   | RU | 29 | -1.692 | -16.250 | 4.671  | 0.00 | 0.00 |
| ATOM | 918 | O2   | RU | 29 | -1.129 | -16.278 | 5.748  | 0.00 | 0.00 |
| ATOM | 919 | C3'  | RU | 29 | -5.742 | -16.100 | 6.093  | 0.00 | 0.00 |
| ATOM | 920 | H3'  | RU | 29 | -5.835 | -15.585 | 5.153  | 0.00 | 0.00 |
| ATOM | 921 | C2'  | RU | 29 | -4.284 | -16.126 | 6.514  | 0.00 | 0.00 |
| ATOM | 922 | 1H2' | RU | 29 | -3.822 | -15.176 | 6.326  | 0.00 | 0.00 |
| ATOM | 923 | O2'  | RU | 29 | -4.143 | -16.493 | 7.859  | 0.00 | 0.00 |
| ATOM | 924 | 2HO' | RU | 29 | -4.696 | -16.210 | 8.288  | 0.00 | 0.00 |
| ATOM | 925 | O3'  | RU | 29 | -6.576 | -15.545 | 7.083  | 0.00 | 0.00 |
| ATOM | 926 | P    | RG | 30 | -6.917 | -14.012 | 7.090  | 0.00 | 0.00 |
| ATOM | 927 | O1P  | RG | 30 | -7.768 | -13.767 | 8.250  | 0.00 | 0.00 |
| ATOM | 928 | O2P  | RG | 30 | -7.414 | -13.645 | 5.776  | 0.00 | 0.00 |
| ATOM | 929 | O5'  | RG | 30 | -5.541 | -13.281 | 7.297  | 0.00 | 0.00 |
| ATOM | 930 | C5'  | RG | 30 | -4.916 | -13.196 | 8.545  | 0.00 | 0.00 |
| ATOM | 931 | 1H5' | RG | 30 | -4.724 | -14.181 | 8.914  | 0.00 | 0.00 |
| ATOM | 932 | 2H5' | RG | 30 | -5.561 | -12.693 | 9.237  | 0.00 | 0.00 |
| ATOM | 933 | C4'  | RG | 30 | -3.621 | -12.416 | 8.483  | 0.00 | 0.00 |
| ATOM | 934 | H4'  | RG | 30 | -3.215 | -12.359 | 9.476  | 0.00 | 0.00 |
| ATOM | 935 | O4'  | RG | 30 | -2.670 | -13.019 | 7.647  | 0.00 | 0.00 |
| ATOM | 936 | C1'  | RG | 30 | -1.801 | -12.012 | 7.155  | 0.00 | 0.00 |
| ATOM | 937 | H1'  | RG | 30 | -0.817 | -12.127 | 7.578  | 0.00 | 0.00 |
| ATOM | 938 | N9   | RG | 30 | -1.691 | -12.103 | 5.689  | 0.00 | 0.00 |
| ATOM | 939 | C8   | RG | 30 | -2.665 | -12.324 | 4.765  | 0.00 | 0.00 |
| ATOM | 940 | H8   | RG | 30 | -3.678 | -12.501 | 5.046  | 0.00 | 0.00 |
| ATOM | 941 | N7   | RG | 30 | -2.243 | -12.311 | 3.538  | 0.00 | 0.00 |
| ATOM | 942 | C5   | RG | 30 | -0.878 | -12.059 | 3.655  | 0.00 | 0.00 |
| ATOM | 943 | C6   | RG | 30 | 0.160  | -11.915 | 2.672  | 0.00 | 0.00 |
| ATOM | 944 | O6   | RG | 30 | 0.096  | -12.010 | 1.453  | 0.00 | 0.00 |
| ATOM | 945 | N1   | RG | 30 | 1.392  | -11.644 | 3.215  | 0.00 | 0.00 |

|      |      |      |    |    |        |         |        |      |      |
|------|------|------|----|----|--------|---------|--------|------|------|
| ATOM | 946  | H1   | RG | 30 | 2.171  | -11.564 | 2.604  | 0.00 | 0.00 |
| ATOM | 947  | C2   | RG | 30 | 1.612  | -11.522 | 4.532  | 0.00 | 0.00 |
| ATOM | 948  | N2   | RG | 30 | 2.831  | -11.299 | 4.893  | 0.00 | 0.00 |
| ATOM | 949  | H21  | RG | 30 | 3.547  | -11.208 | 4.212  | 0.00 | 0.00 |
| ATOM | 950  | H22  | RG | 30 | 3.007  | -11.208 | 5.852  | 0.00 | 0.00 |
| ATOM | 951  | N3   | RG | 30 | 0.691  | -11.644 | 5.479  | 0.00 | 0.00 |
| ATOM | 952  | C4   | RG | 30 | -0.544 | -11.910 | 4.974  | 0.00 | 0.00 |
| ATOM | 953  | C3'  | RG | 30 | -3.795 | -11.003 | 7.977  | 0.00 | 0.00 |
| ATOM | 954  | H3'  | RG | 30 | -4.413 | -11.015 | 7.096  | 0.00 | 0.00 |
| ATOM | 955  | C2'  | RG | 30 | -2.366 | -10.663 | 7.578  | 0.00 | 0.00 |
| ATOM | 956  | 1H2' | RG | 30 | -2.368 | -9.960  | 6.774  | 0.00 | 0.00 |
| ATOM | 957  | O2'  | RG | 30 | -1.615 | -10.182 | 8.658  | 0.00 | 0.00 |
| ATOM | 958  | 2HO' | RG | 30 | -1.959 | -9.448  | 8.912  | 0.00 | 0.00 |
| ATOM | 959  | O3'  | RG | 30 | -4.304 | -10.128 | 8.953  | 0.00 | 0.00 |
| ATOM | 960  | P    | RA | 31 | -5.331 | -9.013  | 8.590  | 0.00 | 0.00 |
| ATOM | 961  | O1P  | RA | 31 | -5.523 | -8.207  | 9.786  | 0.00 | 0.00 |
| ATOM | 962  | O2P  | RA | 31 | -6.470 | -9.641  | 7.965  | 0.00 | 0.00 |
| ATOM | 963  | O5'  | RA | 31 | -4.599 | -8.151  | 7.507  | 0.00 | 0.00 |
| ATOM | 964  | C5'  | RA | 31 | -4.885 | -6.804  | 7.311  | 0.00 | 0.00 |
| ATOM | 965  | 1H5' | RA | 31 | -4.400 | -6.214  | 8.054  | 0.00 | 0.00 |
| ATOM | 966  | 2H5' | RA | 31 | -5.939 | -6.651  | 7.397  | 0.00 | 0.00 |
| ATOM | 967  | C4'  | RA | 31 | -4.444 | -6.359  | 5.938  | 0.00 | 0.00 |
| ATOM | 968  | H4'  | RA | 31 | -4.651 | -5.307  | 5.841  | 0.00 | 0.00 |
| ATOM | 969  | O4'  | RA | 31 | -3.054 | -6.531  | 5.782  | 0.00 | 0.00 |
| ATOM | 970  | C1'  | RA | 31 | -2.791 | -6.838  | 4.455  | 0.00 | 0.00 |
| ATOM | 971  | H1'  | RA | 31 | -2.879 | -5.954  | 3.885  | 0.00 | 0.00 |
| ATOM | 972  | N9   | RA | 31 | -1.461 | -7.441  | 4.200  | 0.00 | 0.00 |
| ATOM | 973  | C8   | RA | 31 | -1.108 | -8.256  | 3.169  | 0.00 | 0.00 |
| ATOM | 974  | H8   | RA | 31 | -1.815 | -8.638  | 2.472  | 0.00 | 0.00 |
| ATOM | 975  | N7   | RA | 31 | 0.159  | -8.499  | 3.063  | 0.00 | 0.00 |
| ATOM | 976  | C5   | RA | 31 | 0.700  | -7.792  | 4.122  | 0.00 | 0.00 |
| ATOM | 977  | C6   | RA | 31 | 2.008  | -7.591  | 4.617  | 0.00 | 0.00 |
| ATOM | 978  | N6   | RA | 31 | 3.107  | -8.064  | 4.097  | 0.00 | 0.00 |
| ATOM | 979  | H61  | RA | 31 | 3.974  | -7.835  | 4.506  | 0.00 | 0.00 |
| ATOM | 980  | H62  | RA | 31 | 3.045  | -8.505  | 3.219  | 0.00 | 0.00 |
| ATOM | 981  | N1   | RA | 31 | 2.228  | -6.854  | 5.686  | 0.00 | 0.00 |
| ATOM | 982  | C2   | RA | 31 | 1.190  | -6.300  | 6.256  | 0.00 | 0.00 |
| ATOM | 983  | H2   | RA | 31 | 1.396  | -5.702  | 7.109  | 0.00 | 0.00 |
| ATOM | 984  | N3   | RA | 31 | -0.083 | -6.383  | 5.914  | 0.00 | 0.00 |
| ATOM | 985  | C4   | RA | 31 | -0.275 | -7.157  | 4.828  | 0.00 | 0.00 |
| ATOM | 986  | C3'  | RA | 31 | -5.119 | -7.121  | 4.805  | 0.00 | 0.00 |
| ATOM | 987  | H3'  | RA | 31 | -5.753 | -7.895  | 5.173  | 0.00 | 0.00 |
| ATOM | 988  | C2'  | RA | 31 | -3.934 | -7.735  | 4.111  | 0.00 | 0.00 |
| ATOM | 989  | 1H2' | RA | 31 | -3.753 | -8.670  | 4.528  | 0.00 | 0.00 |
| ATOM | 990  | O2'  | RA | 31 | -4.123 | -7.859  | 2.774  | 0.00 | 0.00 |
| ATOM | 991  | 2HO' | RA | 31 | -4.771 | -8.032  | 2.617  | 0.00 | 0.00 |
| ATOM | 992  | O3'  | RA | 31 | -5.812 | -6.252  | 3.937  | 0.00 | 0.00 |
| ATOM | 993  | P    | RG | 32 | -7.336 | -5.946  | 4.113  | 0.00 | 0.00 |
| ATOM | 994  | O1P  | RG | 32 | -8.021 | -7.190  | 4.444  | 0.00 | 0.00 |
| ATOM | 995  | O2P  | RG | 32 | -7.781 | -5.203  | 2.931  | 0.00 | 0.00 |
| ATOM | 996  | O5'  | RG | 32 | -7.453 | -4.991  | 5.364  | 0.00 | 0.00 |
| ATOM | 997  | C5'  | RG | 32 | -6.958 | -3.674  | 5.334  | 0.00 | 0.00 |
| ATOM | 998  | 1H5' | RG | 32 | -7.500 | -3.101  | 4.607  | 0.00 | 0.00 |
| ATOM | 999  | 2H5' | RG | 32 | -5.920 | -3.659  | 5.061  | 0.00 | 0.00 |
| ATOM | 1000 | C4'  | RG | 32 | -7.127 | -3.022  | 6.689  | 0.00 | 0.00 |
| ATOM | 1001 | H4'  | RG | 32 | -8.168 | -2.924  | 6.931  | 0.00 | 0.00 |
| ATOM | 1002 | O4'  | RG | 32 | -6.498 | -3.796  | 7.684  | 0.00 | 0.00 |
| ATOM | 1003 | C1'  | RG | 32 | -6.157 | -2.973  | 8.764  | 0.00 | 0.00 |
| ATOM | 1004 | H1'  | RG | 32 | -6.864 | -3.103  | 9.563  | 0.00 | 0.00 |
| ATOM | 1005 | N9   | RG | 32 | -4.820 | -3.340  | 9.255  | 0.00 | 0.00 |
| ATOM | 1006 | C8   | RG | 32 | -4.484 | -3.678  | 10.519 | 0.00 | 0.00 |
| ATOM | 1007 | H8   | RG | 32 | -5.209 | -3.720  | 11.295 | 0.00 | 0.00 |
| ATOM | 1008 | N7   | RG | 32 | -3.234 | -3.962  | 10.678 | 0.00 | 0.00 |
| ATOM | 1009 | C5   | RG | 32 | -2.682 | -3.774  | 9.424  | 0.00 | 0.00 |
| ATOM | 1010 | C6   | RG | 32 | -1.341 | -3.910  | 8.940  | 0.00 | 0.00 |
| ATOM | 1011 | O6   | RG | 32 | -0.334 | -4.233  | 9.545  | 0.00 | 0.00 |
| ATOM | 1012 | N1   | RG | 32 | -1.205 | -3.629  | 7.620  | 0.00 | 0.00 |
| ATOM | 1013 | H1   | RG | 32 | -0.298 | -3.697  | 7.220  | 0.00 | 0.00 |

|      |      |      |    |    |         |        |        |      |      |
|------|------|------|----|----|---------|--------|--------|------|------|
| ATOM | 1014 | C2   | RG | 32 | -2.219  | -3.231 | 6.842  | 0.00 | 0.00 |
| ATOM | 1015 | N2   | RG | 32 | -1.942  | -2.888 | 5.642  | 0.00 | 0.00 |
| ATOM | 1016 | H21  | RG | 32 | -1.002  | -2.906 | 5.325  | 0.00 | 0.00 |
| ATOM | 1017 | H22  | RG | 32 | -2.686  | -2.573 | 5.084  | 0.00 | 0.00 |
| ATOM | 1018 | N3   | RG | 32 | -3.464  | -3.069 | 7.244  | 0.00 | 0.00 |
| ATOM | 1019 | C4   | RG | 32 | -3.648  | -3.381 | 8.548  | 0.00 | 0.00 |
| ATOM | 1020 | C3'  | RG | 32 | -6.465  | -1.658 | 6.779  | 0.00 | 0.00 |
| ATOM | 1021 | H3'  | RG | 32 | -5.515  | -1.692 | 6.272  | 0.00 | 0.00 |
| ATOM | 1022 | C2'  | RG | 32 | -6.247  | -1.536 | 8.280  | 0.00 | 0.00 |
| ATOM | 1023 | 1H2' | RG | 32 | -5.336  | -1.003 | 8.462  | 0.00 | 0.00 |
| ATOM | 1024 | O2'  | RG | 32 | -7.324  | -0.917 | 8.919  | 0.00 | 0.00 |
| ATOM | 1025 | 2HO' | RG | 32 | -7.414  | -0.100 | 8.544  | 0.00 | 0.00 |
| ATOM | 1026 | O3'  | RG | 32 | -7.266  | -0.639 | 6.220  | 0.00 | 0.00 |
| ATOM | 1027 | P    | RG | 33 | -6.719  | 0.800  | 6.040  | 0.00 | 0.00 |
| ATOM | 1028 | O1P  | RG | 33 | -5.517  | 0.718  | 5.272  | 0.00 | 0.00 |
| ATOM | 1029 | O2P  | RG | 33 | -6.706  | 1.428  | 7.321  | 0.00 | 0.00 |
| ATOM | 1030 | O5'  | RG | 33 | -7.782  | 1.534  | 5.156  | 0.00 | 0.00 |
| ATOM | 1031 | C5'  | RG | 33 | -9.014  | 1.932  | 5.655  | 0.00 | 0.00 |
| ATOM | 1032 | 1H5' | RG | 33 | -8.879  | 2.482  | 6.543  | 0.00 | 0.00 |
| ATOM | 1033 | 2H5' | RG | 33 | -9.573  | 1.068  | 5.886  | 0.00 | 0.00 |
| ATOM | 1034 | C4'  | RG | 33 | -9.806  | 2.797  | 4.687  | 0.00 | 0.00 |
| ATOM | 1035 | H4'  | RG | 33 | -10.800 | 2.874  | 5.068  | 0.00 | 0.00 |
| ATOM | 1036 | O4'  | RG | 33 | -9.282  | 4.094  | 4.605  | 0.00 | 0.00 |
| ATOM | 1037 | C1'  | RG | 33 | -9.233  | 4.499  | 3.247  | 0.00 | 0.00 |
| ATOM | 1038 | H1'  | RG | 33 | -9.624  | 5.496  | 3.123  | 0.00 | 0.00 |
| ATOM | 1039 | N9   | RG | 33 | -7.840  | 4.495  | 2.784  | 0.00 | 0.00 |
| ATOM | 1040 | C8   | RG | 33 | -6.724  | 4.121  | 3.469  | 0.00 | 0.00 |
| ATOM | 1041 | H8   | RG | 33 | -6.768  | 3.727  | 4.462  | 0.00 | 0.00 |
| ATOM | 1042 | N7   | RG | 33 | -5.614  | 4.296  | 2.821  | 0.00 | 0.00 |
| ATOM | 1043 | C5   | RG | 33 | -6.021  | 4.849  | 1.612  | 0.00 | 0.00 |
| ATOM | 1044 | C6   | RG | 33 | -5.273  | 5.279  | 0.471  | 0.00 | 0.00 |
| ATOM | 1045 | O6   | RG | 33 | -4.067  | 5.271  | 0.308  | 0.00 | 0.00 |
| ATOM | 1046 | N1   | RG | 33 | -6.050  | 5.769  | -0.545 | 0.00 | 0.00 |
| ATOM | 1047 | H1   | RG | 33 | -5.587  | 6.126  | -1.352 | 0.00 | 0.00 |
| ATOM | 1048 | C2   | RG | 33 | -7.389  | 5.862  | -0.474 | 0.00 | 0.00 |
| ATOM | 1049 | N2   | RG | 33 | -7.989  | 6.338  | -1.509 | 0.00 | 0.00 |
| ATOM | 1050 | H21  | RG | 33 | -7.472  | 6.631  | -2.310 | 0.00 | 0.00 |
| ATOM | 1051 | H22  | RG | 33 | -8.982  | 6.404  | -1.484 | 0.00 | 0.00 |
| ATOM | 1052 | N3   | RG | 33 | -8.129  | 5.482  | 0.559  | 0.00 | 0.00 |
| ATOM | 1053 | C4   | RG | 33 | -7.387  | 4.974  | 1.580  | 0.00 | 0.00 |
| ATOM | 1054 | C3'  | RG | 33 | -9.907  | 2.242  | 3.281  | 0.00 | 0.00 |
| ATOM | 1055 | H3'  | RG | 33 | -8.971  | 1.803  | 2.995  | 0.00 | 0.00 |
| ATOM | 1056 | C2'  | RG | 33 | -10.101 | 3.516  | 2.482  | 0.00 | 0.00 |
| ATOM | 1057 | 1H2' | RG | 33 | -9.768  | 3.398  | 1.468  | 0.00 | 0.00 |
| ATOM | 1058 | O2'  | RG | 33 | -11.427 | 3.982  | 2.523  | 0.00 | 0.00 |
| ATOM | 1059 | 2HO' | RG | 33 | -11.812 | 3.751  | 2.650  | 0.00 | 0.00 |
| ATOM | 1060 | O3'  | RG | 33 | -10.966 | 1.336  | 3.125  | 0.00 | 0.00 |
| ATOM | 1061 | P    | RU | 34 | -10.919 | 0.216  | 2.035  | 0.00 | 0.00 |
| ATOM | 1062 | O1P  | RU | 34 | -12.159 | -0.531 | 2.129  | 0.00 | 0.00 |
| ATOM | 1063 | O2P  | RU | 34 | -9.662  | -0.494 | 2.176  | 0.00 | 0.00 |
| ATOM | 1064 | O5'  | RU | 34 | -10.907 | 0.941  | 0.648  | 0.00 | 0.00 |
| ATOM | 1065 | C5'  | RU | 34 | -12.063 | 1.532  | 0.109  | 0.00 | 0.00 |
| ATOM | 1066 | 1H5' | RU | 34 | -12.398 | 2.332  | 0.731  | 0.00 | 0.00 |
| ATOM | 1067 | 2H5' | RU | 34 | -12.842 | 0.808  | 0.039  | 0.00 | 0.00 |
| ATOM | 1068 | C4'  | RU | 34 | -11.820 | 2.082  | -1.275 | 0.00 | 0.00 |
| ATOM | 1069 | H4'  | RU | 34 | -12.765 | 2.418  | -1.663 | 0.00 | 0.00 |
| ATOM | 1070 | O4'  | RU | 34 | -10.907 | 3.156  | -1.289 | 0.00 | 0.00 |
| ATOM | 1071 | C1'  | RU | 34 | -10.235 | 3.153  | -2.538 | 0.00 | 0.00 |
| ATOM | 1072 | H1'  | RU | 34 | -10.452 | 4.070  | -3.056 | 0.00 | 0.00 |
| ATOM | 1073 | N1   | RU | 34 | -8.764  | 3.035  | -2.389 | 0.00 | 0.00 |
| ATOM | 1074 | C6   | RU | 34 | -8.178  | 2.483  | -1.282 | 0.00 | 0.00 |
| ATOM | 1075 | H6   | RU | 34 | -8.792  | 2.115  | -0.493 | 0.00 | 0.00 |
| ATOM | 1076 | C5   | RU | 34 | -6.835  | 2.424  | -1.165 | 0.00 | 0.00 |
| ATOM | 1077 | H5   | RU | 34 | -6.389  | 2.010  | -0.287 | 0.00 | 0.00 |
| ATOM | 1078 | C4   | RU | 34 | -5.971  | 2.938  | -2.185 | 0.00 | 0.00 |
| ATOM | 1079 | O4   | RU | 34 | -4.755  | 2.967  | -2.140 | 0.00 | 0.00 |
| ATOM | 1080 | N3   | RU | 34 | -6.620  | 3.473  | -3.251 | 0.00 | 0.00 |
| ATOM | 1081 | H3   | RU | 34 | -6.054  | 3.821  | -3.988 | 0.00 | 0.00 |

|      |      |      |    |    |         |        |         |      |      |
|------|------|------|----|----|---------|--------|---------|------|------|
| ATOM | 1082 | C2   | RU | 34 | -7.973  | 3.520  | -3.424  | 0.00 | 0.00 |
| ATOM | 1083 | O2   | RU | 34 | -8.426  | 3.971  | -4.463  | 0.00 | 0.00 |
| ATOM | 1084 | C3'  | RU | 34 | -11.253 | 1.067  | -2.243  | 0.00 | 0.00 |
| ATOM | 1085 | H3'  | RU | 34 | -10.392 | 0.612  | -1.787  | 0.00 | 0.00 |
| ATOM | 1086 | C2'  | RU | 34 | -10.797 | 1.993  | -3.350  | 0.00 | 0.00 |
| ATOM | 1087 | 1H2' | RU | 34 | -10.046 | 1.530  | -3.956  | 0.00 | 0.00 |
| ATOM | 1088 | O2'  | RU | 34 | -11.849 | 2.464  | -4.149  | 0.00 | 0.00 |
| ATOM | 1089 | 2HO' | RU | 34 | -11.746 | 2.492  | -4.774  | 0.00 | 0.00 |
| ATOM | 1090 | O3'  | RU | 34 | -12.185 | 0.090  | -2.637  | 0.00 | 0.00 |
| ATOM | 1091 | P    | RG | 35 | -11.697 | -1.315 | -3.134  | 0.00 | 0.00 |
| ATOM | 1092 | O1P  | RG | 35 | -12.882 | -2.122 | -3.361  | 0.00 | 0.00 |
| ATOM | 1093 | O2P  | RG | 35 | -10.677 | -1.799 | -2.215  | 0.00 | 0.00 |
| ATOM | 1094 | O5'  | RG | 35 | -11.012 | -1.063 | -4.513  | 0.00 | 0.00 |
| ATOM | 1095 | C5'  | RG | 35 | -11.748 | -0.713 | -5.643  | 0.00 | 0.00 |
| ATOM | 1096 | 1H5' | RG | 35 | -12.383 | 0.123  | -5.430  | 0.00 | 0.00 |
| ATOM | 1097 | 2H5' | RG | 35 | -12.367 | -1.531 | -5.932  | 0.00 | 0.00 |
| ATOM | 1098 | C4'  | RG | 35 | -10.847 | -0.370 | -6.805  | 0.00 | 0.00 |
| ATOM | 1099 | H4'  | RG | 35 | -11.456 | -0.101 | -7.645  | 0.00 | 0.00 |
| ATOM | 1100 | O4'  | RG | 35 | -10.004 | 0.713  | -6.497  | 0.00 | 0.00 |
| ATOM | 1101 | C1'  | RG | 35 | -8.785  | 0.539  | -7.181  | 0.00 | 0.00 |
| ATOM | 1102 | H1'  | RG | 35 | -8.623  | 1.366  | -7.850  | 0.00 | 0.00 |
| ATOM | 1103 | N9   | RG | 35 | -7.665  | 0.491  | -6.234  | 0.00 | 0.00 |
| ATOM | 1104 | C8   | RG | 35 | -7.635  | 0.085  | -4.932  | 0.00 | 0.00 |
| ATOM | 1105 | H8   | RG | 35 | -8.500  | -0.308 | -4.449  | 0.00 | 0.00 |
| ATOM | 1106 | N7   | RG | 35 | -6.488  | 0.224  | -4.355  | 0.00 | 0.00 |
| ATOM | 1107 | C5   | RG | 35 | -5.669  | 0.733  | -5.354  | 0.00 | 0.00 |
| ATOM | 1108 | C6   | RG | 35 | -4.289  | 1.108  | -5.363  | 0.00 | 0.00 |
| ATOM | 1109 | O6   | RG | 35 | -3.476  | 1.123  | -4.455  | 0.00 | 0.00 |
| ATOM | 1110 | N1   | RG | 35 | -3.840  | 1.490  | -6.594  | 0.00 | 0.00 |
| ATOM | 1111 | H1   | RG | 35 | -2.881  | 1.749  | -6.680  | 0.00 | 0.00 |
| ATOM | 1112 | C2   | RG | 35 | -4.622  | 1.568  | -7.679  | 0.00 | 0.00 |
| ATOM | 1113 | N2   | RG | 35 | -4.062  | 1.973  | -8.764  | 0.00 | 0.00 |
| ATOM | 1114 | H21  | RG | 35 | -3.092  | 2.164  | -8.791  | 0.00 | 0.00 |
| ATOM | 1115 | H22  | RG | 35 | -4.628  | 2.071  | -9.564  | 0.00 | 0.00 |
| ATOM | 1116 | N3   | RG | 35 | -5.917  | 1.298  | -7.709  | 0.00 | 0.00 |
| ATOM | 1117 | C4   | RG | 35 | -6.384  | 0.870  | -6.510  | 0.00 | 0.00 |
| ATOM | 1118 | C3'  | RG | 35 | -9.946  | -1.505 | -7.254  | 0.00 | 0.00 |
| ATOM | 1119 | H3'  | RG | 35 | -9.495  | -1.970 | -6.397  | 0.00 | 0.00 |
| ATOM | 1120 | C2'  | RG | 35 | -8.883  | -0.734 | -7.999  | 0.00 | 0.00 |
| ATOM | 1121 | 1H2' | RG | 35 | -7.954  | -1.271 | -8.021  | 0.00 | 0.00 |
| ATOM | 1122 | O2'  | RG | 35 | -9.289  | -0.406 | -9.291  | 0.00 | 0.00 |
| ATOM | 1123 | 2HO' | RG | 35 | -9.562  | -0.951 | -9.616  | 0.00 | 0.00 |
| ATOM | 1124 | O3'  | RG | 35 | -10.621 | -2.439 | -8.060  | 0.00 | 0.00 |
| ATOM | 1125 | P    | RC | 36 | -10.189 | -3.941 | -8.127  | 0.00 | 0.00 |
| ATOM | 1126 | O1P  | RC | 36 | -11.153 | -4.635 | -8.964  | 0.00 | 0.00 |
| ATOM | 1127 | O2P  | RC | 36 | -9.976  | -4.397 | -6.770  | 0.00 | 0.00 |
| ATOM | 1128 | O5'  | RC | 36 | -8.798  | -3.939 | -8.853  | 0.00 | 0.00 |
| ATOM | 1129 | C5'  | RC | 36 | -8.686  | -3.739 | -10.232 | 0.00 | 0.00 |
| ATOM | 1130 | 1H5' | RC | 36 | -9.253  | -2.876 | -10.508 | 0.00 | 0.00 |
| ATOM | 1131 | 2H5' | RC | 36 | -9.069  | -4.590 | -10.757 | 0.00 | 0.00 |
| ATOM | 1132 | C4'  | RC | 36 | -7.255  | -3.510 | -10.647 | 0.00 | 0.00 |
| ATOM | 1133 | H4'  | RC | 36 | -7.246  | -3.279 | -11.694 | 0.00 | 0.00 |
| ATOM | 1134 | O4'  | RC | 36 | -6.695  | -2.418 | -9.969  | 0.00 | 0.00 |
| ATOM | 1135 | C1'  | RC | 36 | -5.304  | -2.615 | -9.832  | 0.00 | 0.00 |
| ATOM | 1136 | H1'  | RC | 36 | -4.789  | -1.878 | -10.420 | 0.00 | 0.00 |
| ATOM | 1137 | N1   | RC | 36 | -4.863  | -2.507 | -8.418  | 0.00 | 0.00 |
| ATOM | 1138 | C6   | RC | 36 | -5.621  | -2.972 | -7.386  | 0.00 | 0.00 |
| ATOM | 1139 | H6   | RC | 36 | -6.568  | -3.417 | -7.578  | 0.00 | 0.00 |
| ATOM | 1140 | C5   | RC | 36 | -5.170  | -2.868 | -6.121  | 0.00 | 0.00 |
| ATOM | 1141 | H5   | RC | 36 | -5.762  | -3.223 | -5.310  | 0.00 | 0.00 |
| ATOM | 1142 | C4   | RC | 36 | -3.903  | -2.292 | -5.927  | 0.00 | 0.00 |
| ATOM | 1143 | N4   | RC | 36 | -3.440  | -2.143 | -4.730  | 0.00 | 0.00 |
| ATOM | 1144 | H41  | RC | 36 | -2.561  | -1.692 | -4.628  | 0.00 | 0.00 |
| ATOM | 1145 | H42  | RC | 36 | -3.964  | -2.444 | -3.953  | 0.00 | 0.00 |
| ATOM | 1146 | N3   | RC | 36 | -3.159  | -1.860 | -6.900  | 0.00 | 0.00 |
| ATOM | 1147 | C2   | RC | 36 | -3.617  | -1.963 | -8.152  | 0.00 | 0.00 |
| ATOM | 1148 | O2   | RC | 36 | -2.903  | -1.576 | -9.052  | 0.00 | 0.00 |
| ATOM | 1149 | C3'  | RC | 36 | -6.334  | -4.687 | -10.426 | 0.00 | 0.00 |



|      |      |      |    |    |        |         |         |      |      |
|------|------|------|----|----|--------|---------|---------|------|------|
| ATOM | 1150 | H3'  | RC | 36 | -6.538 | -5.097  | -9.458  | 0.00 | 0.00 |
| ATOM | 1151 | C2'  | RC | 36 | -4.990 | -3.993  | -10.397 | 0.00 | 0.00 |
| ATOM | 1152 | 1H2' | RC | 36 | -4.313 | -4.532  | -9.767  | 0.00 | 0.00 |
| ATOM | 1153 | O2'  | RC | 36 | -4.449 | -3.822  | -11.668 | 0.00 | 0.00 |
| ATOM | 1154 | 2HO' | RC | 36 | -4.299 | -4.624  | -11.991 | 0.00 | 0.00 |
| ATOM | 1155 | O3'  | RC | 36 | -6.441 | -5.667  | -11.432 | 0.00 | 0.00 |
| ATOM | 1156 | P    | RA | 37 | -5.740 | -7.064  | -11.291 | 0.00 | 0.00 |
| ATOM | 1157 | O1P  | RA | 37 | -6.140 | -7.860  | -12.421 | 0.00 | 0.00 |
| ATOM | 1158 | O2P  | RA | 37 | -5.974 | -7.557  | -9.958  | 0.00 | 0.00 |
| ATOM | 1159 | O5'  | RA | 37 | -4.222 | -6.728  | -11.455 | 0.00 | 0.00 |
| ATOM | 1160 | C5'  | RA | 37 | -3.223 | -7.411  | -10.768 | 0.00 | 0.00 |
| ATOM | 1161 | 1H5' | RA | 37 | -3.104 | -8.381  | -11.181 | 0.00 | 0.00 |
| ATOM | 1162 | 2H5' | RA | 37 | -3.484 | -7.505  | -9.746  | 0.00 | 0.00 |
| ATOM | 1163 | C4'  | RA | 37 | -1.909 | -6.679  | -10.862 | 0.00 | 0.00 |
| ATOM | 1164 | H4'  | RA | 37 | -1.653 | -6.559  | -11.890 | 0.00 | 0.00 |
| ATOM | 1165 | O4'  | RA | 37 | -1.986 | -5.411  | -10.259 | 0.00 | 0.00 |
| ATOM | 1166 | C1'  | RA | 37 | -0.815 | -5.146  | -9.514  | 0.00 | 0.00 |
| ATOM | 1167 | H1'  | RA | 37 | -0.385 | -4.209  | -9.802  | 0.00 | 0.00 |
| ATOM | 1168 | N9   | RA | 37 | -1.123 | -5.092  | -8.078  | 0.00 | 0.00 |
| ATOM | 1169 | C8   | RA | 37 | -2.252 | -5.500  | -7.439  | 0.00 | 0.00 |
| ATOM | 1170 | H8   | RA | 37 | -3.070 | -5.953  | -7.951  | 0.00 | 0.00 |
| ATOM | 1171 | N7   | RA | 37 | -2.249 | -5.283  | -6.162  | 0.00 | 0.00 |
| ATOM | 1172 | C5   | RA | 37 | -1.020 | -4.682  | -5.937  | 0.00 | 0.00 |
| ATOM | 1173 | C6   | RA | 37 | -0.358 | -4.157  | -4.814  | 0.00 | 0.00 |
| ATOM | 1174 | N6   | RA | 37 | -0.857 | -4.102  | -3.612  | 0.00 | 0.00 |
| ATOM | 1175 | H61  | RA | 37 | -0.317 | -3.708  | -2.881  | 0.00 | 0.00 |
| ATOM | 1176 | H62  | RA | 37 | -1.762 | -4.465  | -3.471  | 0.00 | 0.00 |
| ATOM | 1177 | N1   | RA | 37 | 0.852  | -3.647  | -4.918  | 0.00 | 0.00 |
| ATOM | 1178 | C2   | RA | 37 | 1.420  | -3.634  | -6.102  | 0.00 | 0.00 |
| ATOM | 1179 | H2   | RA | 37 | 2.403  | -3.222  | -6.142  | 0.00 | 0.00 |
| ATOM | 1180 | N3   | RA | 37 | 0.927  | -4.064  | -7.249  | 0.00 | 0.00 |
| ATOM | 1181 | C4   | RA | 37 | -0.316 | -4.583  | -7.097  | 0.00 | 0.00 |
| ATOM | 1182 | C3'  | RA | 37 | -0.786 | -7.412  | -10.161 | 0.00 | 0.00 |
| ATOM | 1183 | H3'  | RA | 37 | -1.157 | -7.818  | -9.244  | 0.00 | 0.00 |
| ATOM | 1184 | C2'  | RA | 37 | 0.149  | -6.271  | -9.838  | 0.00 | 0.00 |
| ATOM | 1185 | 1H2' | RA | 37 | 0.778  | -6.520  | -9.006  | 0.00 | 0.00 |
| ATOM | 1186 | O2'  | RA | 37 | 0.921  | -5.895  | -10.937 | 0.00 | 0.00 |
| ATOM | 1187 | 2HO' | RA | 37 | 1.156  | -6.291  | -11.194 | 0.00 | 0.00 |
| ATOM | 1188 | O3'  | RA | 37 | -0.214 | -8.392  | -10.988 | 0.00 | 0.00 |
| ATOM | 1189 | P    | RC | 38 | 0.383  | -9.712  | -10.403 | 0.00 | 0.00 |
| ATOM | 1190 | O1P  | RC | 38 | 0.866  | -10.491 | -11.527 | 0.00 | 0.00 |
| ATOM | 1191 | O2P  | RC | 38 | -0.591 | -10.298 | -9.507  | 0.00 | 0.00 |
| ATOM | 1192 | O5'  | RC | 38 | 1.623  | -9.272  | -9.535  | 0.00 | 0.00 |
| ATOM | 1193 | C5'  | RC | 38 | 2.821  | -8.866  | -10.124 | 0.00 | 0.00 |
| ATOM | 1194 | 1H5' | RC | 38 | 2.604  | -8.145  | -10.881 | 0.00 | 0.00 |
| ATOM | 1195 | 2H5' | RC | 38 | 3.307  | -9.698  | -10.572 | 0.00 | 0.00 |
| ATOM | 1196 | C4'  | RC | 38 | 3.767  | -8.249  | -9.115  | 0.00 | 0.00 |
| ATOM | 1197 | H4'  | RC | 38 | 4.661  | -7.965  | -9.637  | 0.00 | 0.00 |
| ATOM | 1198 | O4'  | RC | 38 | 3.210  | -7.108  | -8.497  | 0.00 | 0.00 |
| ATOM | 1199 | C1'  | RC | 38 | 3.726  | -6.989  | -7.181  | 0.00 | 0.00 |
| ATOM | 1200 | H1'  | RC | 38 | 4.241  | -6.050  | -7.072  | 0.00 | 0.00 |
| ATOM | 1201 | N1   | RC | 38 | 2.688  | -7.089  | -6.133  | 0.00 | 0.00 |
| ATOM | 1202 | C6   | RC | 38 | 1.485  | -7.696  | -6.342  | 0.00 | 0.00 |
| ATOM | 1203 | H6   | RC | 38 | 1.268  | -8.111  | -7.296  | 0.00 | 0.00 |
| ATOM | 1204 | C5   | RC | 38 | 0.593  | -7.803  | -5.345  | 0.00 | 0.00 |
| ATOM | 1205 | H5   | RC | 38 | -0.339 | -8.290  | -5.514  | 0.00 | 0.00 |
| ATOM | 1206 | C4   | RC | 38 | 0.956  | -7.275  | -4.098  | 0.00 | 0.00 |
| ATOM | 1207 | N4   | RC | 38 | 0.142  | -7.346  | -3.111  | 0.00 | 0.00 |
| ATOM | 1208 | H41  | RC | 38 | 0.416  | -6.893  | -2.271  | 0.00 | 0.00 |
| ATOM | 1209 | H42  | RC | 38 | -0.748 | -7.741  | -3.238  | 0.00 | 0.00 |
| ATOM | 1210 | N3   | RC | 38 | 2.100  | -6.694  | -3.875  | 0.00 | 0.00 |
| ATOM | 1211 | C2   | RC | 38 | 2.983  | -6.592  | -4.871  | 0.00 | 0.00 |
| ATOM | 1212 | O2   | RC | 38 | 4.058  | -6.075  | -4.622  | 0.00 | 0.00 |
| ATOM | 1213 | C3'  | RC | 38 | 4.188  | -9.163  | -7.982  | 0.00 | 0.00 |
| ATOM | 1214 | H3'  | RC | 38 | 3.308  | -9.615  | -7.565  | 0.00 | 0.00 |
| ATOM | 1215 | C2'  | RC | 38 | 4.725  | -8.122  | -7.018  | 0.00 | 0.00 |
| ATOM | 1216 | 1H2' | RC | 38 | 4.758  | -8.509  | -6.018  | 0.00 | 0.00 |
| ATOM | 1217 | O2'  | RC | 38 | 5.984  | -7.639  | -7.409  | 0.00 | 0.00 |

|      |      |      |    |    |        |         |        |      |      |
|------|------|------|----|----|--------|---------|--------|------|------|
| ATOM | 1218 | 2HO' | RC | 38 | 6.410  | -8.202  | -7.707 | 0.00 | 0.00 |
| ATOM | 1219 | O3'  | RC | 38 | 5.167  | -10.123 | -8.310 | 0.00 | 0.00 |
| ATOM | 1220 | P    | RA | 39 | 5.435  | -11.370 | -7.384 | 0.00 | 0.00 |
| ATOM | 1221 | O1P  | RA | 39 | 6.442  | -12.185 | -8.040 | 0.00 | 0.00 |
| ATOM | 1222 | O2P  | RA | 39 | 4.149  | -11.967 | -7.069 | 0.00 | 0.00 |
| ATOM | 1223 | O5'  | RA | 39 | 6.051  | -10.832 | -6.039 | 0.00 | 0.00 |
| ATOM | 1224 | C5'  | RA | 39 | 7.367  | -10.328 | -5.978 | 0.00 | 0.00 |
| ATOM | 1225 | 1H5' | RA | 39 | 7.502  | -9.623  | -6.769 | 0.00 | 0.00 |
| ATOM | 1226 | 2H5' | RA | 39 | 8.075  | -11.116 | -6.126 | 0.00 | 0.00 |
| ATOM | 1227 | C4'  | RA | 39 | 7.679  | -9.641  | -4.669 | 0.00 | 0.00 |
| ATOM | 1228 | H4'  | RA | 39 | 8.590  | -9.090  | -4.796 | 0.00 | 0.00 |
| ATOM | 1229 | O4'  | RA | 39 | 6.668  | -8.733  | -4.274 | 0.00 | 0.00 |
| ATOM | 1230 | C1'  | RA | 39 | 6.602  | -8.716  | -2.865 | 0.00 | 0.00 |
| ATOM | 1231 | H1'  | RA | 39 | 6.804  | -7.724  | -2.508 | 0.00 | 0.00 |
| ATOM | 1232 | N9   | RA | 39 | 5.262  | -9.105  | -2.400 | 0.00 | 0.00 |
| ATOM | 1233 | C8   | RA | 39 | 4.214  | -9.654  | -3.075 | 0.00 | 0.00 |
| ATOM | 1234 | H8   | RA | 39 | 4.286  | -9.944  | -4.101 | 0.00 | 0.00 |
| ATOM | 1235 | N7   | RA | 39 | 3.113  | -9.766  | -2.382 | 0.00 | 0.00 |
| ATOM | 1236 | C5   | RA | 39 | 3.475  | -9.249  | -1.135 | 0.00 | 0.00 |
| ATOM | 1237 | C6   | RA | 39 | 2.821  | -9.013  | 0.089  | 0.00 | 0.00 |
| ATOM | 1238 | N6   | RA | 39 | 1.567  | -9.232  | 0.341  | 0.00 | 0.00 |
| ATOM | 1239 | H61  | RA | 39 | 1.244  | -9.017  | 1.249  | 0.00 | 0.00 |
| ATOM | 1240 | H62  | RA | 39 | 0.996  | -9.636  | -0.352 | 0.00 | 0.00 |
| ATOM | 1241 | N1   | RA | 39 | 3.471  | -8.522  | 1.139  | 0.00 | 0.00 |
| ATOM | 1242 | C2   | RA | 39 | 4.747  | -8.248  | 0.990  | 0.00 | 0.00 |
| ATOM | 1243 | H2   | RA | 39 | 5.233  | -7.857  | 1.854  | 0.00 | 0.00 |
| ATOM | 1244 | N3   | RA | 39 | 5.490  | -8.381  | -0.091 | 0.00 | 0.00 |
| ATOM | 1245 | C4   | RA | 39 | 4.789  | -8.890  | -1.129 | 0.00 | 0.00 |
| ATOM | 1246 | C3'  | RA | 39 | 7.889  | -10.595 | -3.514 | 0.00 | 0.00 |
| ATOM | 1247 | H3'  | RA | 39 | 7.105  | -11.322 | -3.524 | 0.00 | 0.00 |
| ATOM | 1248 | C2'  | RA | 39 | 7.692  | -9.650  | -2.358 | 0.00 | 0.00 |
| ATOM | 1249 | 1H2' | RA | 39 | 7.373  | -10.181 | -1.488 | 0.00 | 0.00 |
| ATOM | 1250 | O2'  | RA | 39 | 8.832  | -8.879  | -2.098 | 0.00 | 0.00 |
| ATOM | 1251 | 2HO' | RA | 39 | 9.223  | -9.094  | -1.906 | 0.00 | 0.00 |
| ATOM | 1252 | O3'  | RA | 39 | 9.169  | -11.174 | -3.532 | 0.00 | 0.00 |
| ATOM | 1253 | P    | RC | 40 | 9.447  | -12.539 | -2.833 | 0.00 | 0.00 |
| ATOM | 1254 | O1P  | RC | 40 | 10.843 | -12.862 | -3.074 | 0.00 | 0.00 |
| ATOM | 1255 | O2P  | RC | 40 | 8.427  | -13.477 | -3.254 | 0.00 | 0.00 |
| ATOM | 1256 | O5'  | RC | 40 | 9.241  | -12.301 | -1.295 | 0.00 | 0.00 |
| ATOM | 1257 | C5'  | RC | 40 | 10.152 | -11.566 | -0.520 | 0.00 | 0.00 |
| ATOM | 1258 | 1H5' | RC | 40 | 10.356 | -10.629 | -0.988 | 0.00 | 0.00 |
| ATOM | 1259 | 2H5' | RC | 40 | 11.074 | -12.109 | -0.439 | 0.00 | 0.00 |
| ATOM | 1260 | C4'  | RC | 40 | 9.612  | -11.299 | 0.885  | 0.00 | 0.00 |
| ATOM | 1261 | H4'  | RC | 40 | 10.350 | -10.726 | 1.423  | 0.00 | 0.00 |
| ATOM | 1262 | O4'  | RC | 40 | 8.415  | -10.545 | 0.859  | 0.00 | 0.00 |
| ATOM | 1263 | C1'  | RC | 40 | 7.565  | -10.968 | 1.912  | 0.00 | 0.00 |
| ATOM | 1264 | H1'  | RC | 40 | 7.328  | -10.123 | 2.537  | 0.00 | 0.00 |
| ATOM | 1265 | N1   | RC | 40 | 6.281  | -11.538 | 1.404  | 0.00 | 0.00 |
| ATOM | 1266 | C6   | RC | 40 | 6.178  | -12.131 | 0.188  | 0.00 | 0.00 |
| ATOM | 1267 | H6   | RC | 40 | 7.051  | -12.253 | -0.412 | 0.00 | 0.00 |
| ATOM | 1268 | C5   | RC | 40 | 4.982  | -12.531 | -0.276 | 0.00 | 0.00 |
| ATOM | 1269 | H5   | RC | 40 | 4.902  | -12.963 | -1.243 | 0.00 | 0.00 |
| ATOM | 1270 | C4   | RC | 40 | 3.861  | -12.347 | 0.545  | 0.00 | 0.00 |
| ATOM | 1271 | N4   | RC | 40 | 2.678  | -12.656 | 0.120  | 0.00 | 0.00 |
| ATOM | 1272 | H41  | RC | 40 | 1.908  | -12.512 | 0.716  | 0.00 | 0.00 |
| ATOM | 1273 | H42  | RC | 40 | 2.577  | -13.009 | -0.798 | 0.00 | 0.00 |
| ATOM | 1274 | N3   | RC | 40 | 3.938  | -11.826 | 1.733  | 0.00 | 0.00 |
| ATOM | 1275 | C2   | RC | 40 | 5.138  | -11.423 | 2.185  | 0.00 | 0.00 |
| ATOM | 1276 | O2   | RC | 40 | 5.189  | -10.955 | 3.302  | 0.00 | 0.00 |
| ATOM | 1277 | C3'  | RC | 40 | 9.312  | -12.547 | 1.685  | 0.00 | 0.00 |
| ATOM | 1278 | H3'  | RC | 40 | 8.782  | -13.252 | 1.073  | 0.00 | 0.00 |
| ATOM | 1279 | C2'  | RC | 40 | 8.353  | -11.982 | 2.723  | 0.00 | 0.00 |
| ATOM | 1280 | 1H2' | RC | 40 | 7.713  | -12.744 | 3.125  | 0.00 | 0.00 |
| ATOM | 1281 | O2'  | RC | 40 | 9.021  | -11.290 | 3.743  | 0.00 | 0.00 |
| ATOM | 1282 | 2HO' | RC | 40 | 9.567  | -11.627 | 3.979  | 0.00 | 0.00 |
| ATOM | 1283 | O3'  | RC | 40 | 10.464 | -13.127 | 2.250  | 0.00 | 0.00 |
| ATOM | 1284 | P    | RA | 41 | 10.497 | -14.640 | 2.658  | 0.00 | 0.00 |
| ATOM | 1285 | O1P  | RA | 41 | 11.838 | -14.947 | 3.140  | 0.00 | 0.00 |

|      |      |      |    |    |        |         |       |      |      |
|------|------|------|----|----|--------|---------|-------|------|------|
| ATOM | 1286 | O2P  | RA | 41 | 9.943  | -15.426 | 1.569 | 0.00 | 0.00 |
| ATOM | 1287 | O5'  | RA | 41 | 9.500  | -14.763 | 3.863 | 0.00 | 0.00 |
| ATOM | 1288 | C5'  | RA | 41 | 9.841  | -14.353 | 5.163 | 0.00 | 0.00 |
| ATOM | 1289 | 1H5' | RA | 41 | 10.141 | -13.323 | 5.151 | 0.00 | 0.00 |
| ATOM | 1290 | 2H5' | RA | 41 | 10.666 | -14.935 | 5.521 | 0.00 | 0.00 |
| ATOM | 1291 | C4'  | RA | 41 | 8.678  | -14.510 | 6.134 | 0.00 | 0.00 |
| ATOM | 1292 | H4'  | RA | 41 | 9.022  | -14.225 | 7.108 | 0.00 | 0.00 |
| ATOM | 1293 | O4'  | RA | 41 | 7.582  | -13.688 | 5.795 | 0.00 | 0.00 |
| ATOM | 1294 | C1'  | RA | 41 | 6.373  | -14.365 | 6.095 | 0.00 | 0.00 |
| ATOM | 1295 | H1'  | RA | 41 | 5.743  | -13.765 | 6.733 | 0.00 | 0.00 |
| ATOM | 1296 | N9   | RA | 41 | 5.626  | -14.649 | 4.862 | 0.00 | 0.00 |
| ATOM | 1297 | C8   | RA | 41 | 6.095  | -14.839 | 3.596 | 0.00 | 0.00 |
| ATOM | 1298 | H8   | RA | 41 | 7.138  | -14.864 | 3.364 | 0.00 | 0.00 |
| ATOM | 1299 | N7   | RA | 41 | 5.176  | -14.958 | 2.693 | 0.00 | 0.00 |
| ATOM | 1300 | C5   | RA | 41 | 3.998  | -14.902 | 3.433 | 0.00 | 0.00 |
| ATOM | 1301 | C6   | RA | 41 | 2.623  | -15.004 | 3.137 | 0.00 | 0.00 |
| ATOM | 1302 | N6   | RA | 41 | 2.111  | -15.132 | 1.939 | 0.00 | 0.00 |
| ATOM | 1303 | H61  | RA | 41 | 1.127  | -15.176 | 1.834 | 0.00 | 0.00 |
| ATOM | 1304 | H62  | RA | 41 | 2.719  | -15.143 | 1.163 | 0.00 | 0.00 |
| ATOM | 1305 | N1   | RA | 41 | 1.712  | -14.955 | 4.089 | 0.00 | 0.00 |
| ATOM | 1306 | C2   | RA | 41 | 2.128  | -14.803 | 5.320 | 0.00 | 0.00 |
| ATOM | 1307 | H2   | RA | 41 | 1.367  | -14.764 | 6.065 | 0.00 | 0.00 |
| ATOM | 1308 | N3   | RA | 41 | 3.366  | -14.686 | 5.760 | 0.00 | 0.00 |
| ATOM | 1309 | C4   | RA | 41 | 4.265  | -14.739 | 4.754 | 0.00 | 0.00 |
| ATOM | 1310 | C3'  | RA | 41 | 8.121  | -15.918 | 6.218 | 0.00 | 0.00 |
| ATOM | 1311 | H3'  | RA | 41 | 8.000  | -16.301 | 5.224 | 0.00 | 0.00 |
| ATOM | 1312 | C2'  | RA | 41 | 6.752  | -15.643 | 6.817 | 0.00 | 0.00 |
| ATOM | 1313 | 1H2' | RA | 41 | 6.064  | -16.440 | 6.597 | 0.00 | 0.00 |
| ATOM | 1314 | O2'  | RA | 41 | 6.785  | -15.400 | 8.193 | 0.00 | 0.00 |
| ATOM | 1315 | 2HO' | RA | 41 | 7.437  | -15.654 | 8.519 | 0.00 | 0.00 |
| ATOM | 1316 | O3'  | RA | 41 | 8.897  | -16.773 | 6.996 | 0.00 | 0.00 |
| ATOM | 1317 | P    | RG | 42 | 8.947  | -18.300 | 6.702 | 0.00 | 0.00 |
| ATOM | 1318 | O1P  | RG | 42 | 9.919  | -18.892 | 7.603 | 0.00 | 0.00 |
| ATOM | 1319 | O2P  | RG | 42 | 9.102  | -18.487 | 5.272 | 0.00 | 0.00 |
| ATOM | 1320 | O5'  | RG | 42 | 7.523  | -18.823 | 7.106 | 0.00 | 0.00 |
| ATOM | 1321 | C5'  | RG | 42 | 7.134  | -18.931 | 8.454 | 0.00 | 0.00 |
| ATOM | 1322 | 1H5' | RG | 42 | 7.354  | -18.019 | 8.967 | 0.00 | 0.00 |
| ATOM | 1323 | 2H5' | RG | 42 | 7.693  | -19.709 | 8.929 | 0.00 | 0.00 |
| ATOM | 1324 | C4'  | RG | 42 | 5.658  | -19.260 | 8.619 | 0.00 | 0.00 |
| ATOM | 1325 | H4'  | RG | 42 | 5.438  | -19.333 | 9.669 | 0.00 | 0.00 |
| ATOM | 1326 | O4'  | RG | 42 | 4.840  | -18.260 | 8.062 | 0.00 | 0.00 |
| ATOM | 1327 | C1'  | RG | 42 | 3.676  | -18.865 | 7.533 | 0.00 | 0.00 |
| ATOM | 1328 | H1'  | RG | 42 | 2.792  | -18.434 | 7.972 | 0.00 | 0.00 |
| ATOM | 1329 | N9   | RG | 42 | 3.597  | -18.674 | 6.077 | 0.00 | 0.00 |
| ATOM | 1330 | C8   | RG | 42 | 4.580  | -18.374 | 5.197 | 0.00 | 0.00 |
| ATOM | 1331 | H8   | RG | 42 | 5.599  | -18.241 | 5.487 | 0.00 | 0.00 |
| ATOM | 1332 | N7   | RG | 42 | 4.178  | -18.242 | 3.967 | 0.00 | 0.00 |
| ATOM | 1333 | C5   | RG | 42 | 2.816  | -18.502 | 4.040 | 0.00 | 0.00 |
| ATOM | 1334 | C6   | RG | 42 | 1.793  | -18.543 | 3.038 | 0.00 | 0.00 |
| ATOM | 1335 | O6   | RG | 42 | 1.867  | -18.300 | 1.849 | 0.00 | 0.00 |
| ATOM | 1336 | N1   | RG | 42 | 0.572  | -18.930 | 3.526 | 0.00 | 0.00 |
| ATOM | 1337 | H1   | RG | 42 | -0.170 | -19.045 | 2.869 | 0.00 | 0.00 |
| ATOM | 1338 | C2   | RG | 42 | 0.338  | -19.231 | 4.805 | 0.00 | 0.00 |
| ATOM | 1339 | N2   | RG | 42 | -0.841 | -19.666 | 5.105 | 0.00 | 0.00 |
| ATOM | 1340 | H21  | RG | 42 | -1.510 | -19.826 | 4.389 | 0.00 | 0.00 |
| ATOM | 1341 | H22  | RG | 42 | -1.008 | -19.935 | 6.040 | 0.00 | 0.00 |
| ATOM | 1342 | N3   | RG | 42 | 1.235  | -19.164 | 5.769 | 0.00 | 0.00 |
| ATOM | 1343 | C4   | RG | 42 | 2.462  | -18.799 | 5.327 | 0.00 | 0.00 |
| ATOM | 1344 | C3'  | RG | 42 | 5.239  | -20.556 | 7.972 | 0.00 | 0.00 |
| ATOM | 1345 | H3'  | RG | 42 | 5.643  | -20.598 | 6.977 | 0.00 | 0.00 |
| ATOM | 1346 | C2'  | RG | 42 | 3.731  | -20.332 | 7.897 | 0.00 | 0.00 |
| ATOM | 1347 | 1H2' | RG | 42 | 3.293  | -20.945 | 7.133 | 0.00 | 0.00 |
| ATOM | 1348 | O2'  | RG | 42 | 3.079  | -20.513 | 9.129 | 0.00 | 0.00 |
| ATOM | 1349 | 2HO' | RG | 42 | 3.123  | -20.825 | 9.425 | 0.00 | 0.00 |
| ATOM | 1350 | O3'  | RG | 42 | 5.603  | -21.671 | 8.724 | 0.00 | 0.00 |
| ATOM | 1351 | P    | RC | 43 | 5.789  | -23.066 | 8.054 | 0.00 | 0.00 |
| ATOM | 1352 | O1P  | RC | 43 | 6.160  | -23.991 | 9.106 | 0.00 | 0.00 |
| ATOM | 1353 | O2P  | RC | 43 | 6.679  | -22.915 | 6.918 | 0.00 | 0.00 |

|      |      |      |    |    |        |         |        |      |      |
|------|------|------|----|----|--------|---------|--------|------|------|
| ATOM | 1354 | O5'  | RC | 43 | 4.369  | -23.477 | 7.517  | 0.00 | 0.00 |
| ATOM | 1355 | C5'  | RC | 43 | 3.343  | -23.894 | 8.376  | 0.00 | 0.00 |
| ATOM | 1356 | 1H5' | RC | 43 | 3.159  | -23.154 | 9.121  | 0.00 | 0.00 |
| ATOM | 1357 | 2H5' | RC | 43 | 3.642  | -24.791 | 8.871  | 0.00 | 0.00 |
| ATOM | 1358 | C4'  | RC | 43 | 2.045  | -24.160 | 7.637  | 0.00 | 0.00 |
| ATOM | 1359 | H4'  | RC | 43 | 1.309  | -24.504 | 8.338  | 0.00 | 0.00 |
| ATOM | 1360 | O4'  | RC | 43 | 1.530  | -23.013 | 7.011  | 0.00 | 0.00 |
| ATOM | 1361 | C1'  | RC | 43 | 0.834  | -23.398 | 5.843  | 0.00 | 0.00 |
| ATOM | 1362 | H1'  | RC | 43 | -0.196 | -23.110 | 5.927  | 0.00 | 0.00 |
| ATOM | 1363 | N1   | RC | 43 | 1.420  | -22.797 | 4.622  | 0.00 | 0.00 |
| ATOM | 1364 | C6   | RC | 43 | 2.721  | -22.395 | 4.559  | 0.00 | 0.00 |
| ATOM | 1365 | H6   | RC | 43 | 3.349  | -22.486 | 5.417  | 0.00 | 0.00 |
| ATOM | 1366 | C5   | RC | 43 | 3.211  | -21.875 | 3.423  | 0.00 | 0.00 |
| ATOM | 1367 | H5   | RC | 43 | 4.227  | -21.558 | 3.377  | 0.00 | 0.00 |
| ATOM | 1368 | C4   | RC | 43 | 2.341  | -21.790 | 2.323  | 0.00 | 0.00 |
| ATOM | 1369 | N4   | RC | 43 | 2.758  | -21.291 | 1.216  | 0.00 | 0.00 |
| ATOM | 1370 | H41  | RC | 43 | 2.101  | -21.172 | 0.490  | 0.00 | 0.00 |
| ATOM | 1371 | H42  | RC | 43 | 3.674  | -20.973 | 1.146  | 0.00 | 0.00 |
| ATOM | 1372 | N3   | RC | 43 | 1.091  | -22.165 | 2.362  | 0.00 | 0.00 |
| ATOM | 1373 | C2   | RC | 43 | 0.617  | -22.693 | 3.494  | 0.00 | 0.00 |
| ATOM | 1374 | O2   | RC | 43 | -0.532 | -23.084 | 3.488  | 0.00 | 0.00 |
| ATOM | 1375 | C3'  | RC | 43 | 2.159  | -25.193 | 6.556  | 0.00 | 0.00 |
| ATOM | 1376 | H3'  | RC | 43 | 3.017  | -24.955 | 5.960  | 0.00 | 0.00 |
| ATOM | 1377 | C2'  | RC | 43 | 0.897  | -24.910 | 5.769  | 0.00 | 0.00 |
| ATOM | 1378 | 1H2' | RC | 43 | 0.984  | -25.261 | 4.765  | 0.00 | 0.00 |
| ATOM | 1379 | O2'  | RC | 43 | -0.260 | -25.430 | 6.371  | 0.00 | 0.00 |
| ATOM | 1380 | 2HO' | RC | 43 | -0.405 | -25.973 | 6.316  | 0.00 | 0.00 |
| ATOM | 1381 | O3'  | RC | 43 | 2.243  | -26.507 | 7.027  | 0.00 | 0.00 |
| ATOM | 1382 | P    | RA | 44 | 2.889  | -27.634 | 6.155  | 0.00 | 0.00 |
| ATOM | 1383 | O1P  | RA | 44 | 2.933  | -28.836 | 6.964  | 0.00 | 0.00 |
| ATOM | 1384 | O2P  | RA | 44 | 4.123  | -27.121 | 5.583  | 0.00 | 0.00 |
| ATOM | 1385 | O5'  | RA | 44 | 1.877  | -27.876 | 4.983  | 0.00 | 0.00 |
| ATOM | 1386 | C5'  | RA | 44 | 0.663  | -28.532 | 5.194  | 0.00 | 0.00 |
| ATOM | 1387 | 1H5' | RA | 44 | 0.121  | -28.054 | 5.974  | 0.00 | 0.00 |
| ATOM | 1388 | 2H5' | RA | 44 | 0.847  | -29.536 | 5.500  | 0.00 | 0.00 |
| ATOM | 1389 | C4'  | RA | 44 | -0.196 | -28.563 | 3.959  | 0.00 | 0.00 |
| ATOM | 1390 | H4'  | RA | 44 | -1.110 | -29.067 | 4.211  | 0.00 | 0.00 |
| ATOM | 1391 | O4'  | RA | 44 | -0.503 | -27.277 | 3.481  | 0.00 | 0.00 |
| ATOM | 1392 | C1'  | RA | 44 | -0.596 | -27.327 | 2.075  | 0.00 | 0.00 |
| ATOM | 1393 | H1'  | RA | 44 | -1.557 | -26.996 | 1.746  | 0.00 | 0.00 |
| ATOM | 1394 | N9   | RA | 44 | 0.416  | -26.471 | 1.451  | 0.00 | 0.00 |
| ATOM | 1395 | C8   | RA | 44 | 1.617  | -26.066 | 1.934  | 0.00 | 0.00 |
| ATOM | 1396 | H8   | RA | 44 | 1.968  | -26.356 | 2.898  | 0.00 | 0.00 |
| ATOM | 1397 | N7   | RA | 44 | 2.275  | -25.278 | 1.149  | 0.00 | 0.00 |
| ATOM | 1398 | C5   | RA | 44 | 1.457  | -25.193 | 0.030  | 0.00 | 0.00 |
| ATOM | 1399 | C6   | RA | 44 | 1.521  | -24.549 | -1.214 | 0.00 | 0.00 |
| ATOM | 1400 | N6   | RA | 44 | 2.477  | -23.767 | -1.617 | 0.00 | 0.00 |
| ATOM | 1401 | H61  | RA | 44 | 2.391  | -23.340 | -2.505 | 0.00 | 0.00 |
| ATOM | 1402 | H62  | RA | 44 | 3.220  | -23.565 | -1.003 | 0.00 | 0.00 |
| ATOM | 1403 | N1   | RA | 44 | 0.567  | -24.695 | -2.112 | 0.00 | 0.00 |
| ATOM | 1404 | C2   | RA | 44 | -0.447 | -25.462 | -1.809 | 0.00 | 0.00 |
| ATOM | 1405 | H2   | RA | 44 | -1.193 | -25.558 | -2.563 | 0.00 | 0.00 |
| ATOM | 1406 | N3   | RA | 44 | -0.660 | -26.124 | -0.690 | 0.00 | 0.00 |
| ATOM | 1407 | C4   | RA | 44 | 0.337  | -25.940 | 0.200  | 0.00 | 0.00 |
| ATOM | 1408 | C3'  | RA | 44 | 0.434  | -29.301 | 2.811  | 0.00 | 0.00 |
| ATOM | 1409 | H3'  | RA | 44 | 1.441  | -28.961 | 2.695  | 0.00 | 0.00 |
| ATOM | 1410 | C2'  | RA | 44 | -0.405 | -28.770 | 1.674  | 0.00 | 0.00 |
| ATOM | 1411 | 1H2' | RA | 44 | 0.123  | -28.843 | 0.746  | 0.00 | 0.00 |
| ATOM | 1412 | O2'  | RA | 44 | -1.663 | -29.380 | 1.584  | 0.00 | 0.00 |
| ATOM | 1413 | 2HO' | RA | 44 | -1.696 | -29.906 | 1.392  | 0.00 | 0.00 |
| ATOM | 1414 | O3'  | RA | 44 | 0.375  | -30.696 | 2.962  | 0.00 | 0.00 |
| ATOM | 1415 | P    | RA | 45 | 1.356  | -31.637 | 2.188  | 0.00 | 0.00 |
| ATOM | 1416 | O1P  | RA | 45 | 1.169  | -32.983 | 2.689  | 0.00 | 0.00 |
| ATOM | 1417 | O2P  | RA | 45 | 2.676  | -31.048 | 2.214  | 0.00 | 0.00 |
| ATOM | 1418 | O5'  | RA | 45 | 0.869  | -31.594 | 0.710  | 0.00 | 0.00 |
| ATOM | 1419 | C5'  | RA | 45 | -0.296 | -32.240 | 0.299  | 0.00 | 0.00 |
| ATOM | 1420 | 1H5' | RA | 45 | -1.123 | -31.935 | 0.907  | 0.00 | 0.00 |
| ATOM | 1421 | 2H5' | RA | 45 | -0.183 | -33.297 | 0.397  | 0.00 | 0.00 |

|      |      |      |     |    |        |         |        |      |      |
|------|------|------|-----|----|--------|---------|--------|------|------|
| ATOM | 1422 | C4'  | RA  | 45 | -0.615 | -31.929 | -1.143 | 0.00 | 0.00 |
| ATOM | 1423 | H4'  | RA  | 45 | -1.536 | -32.404 | -1.410 | 0.00 | 0.00 |
| ATOM | 1424 | O4'  | RA  | 45 | -0.762 | -30.547 | -1.340 | 0.00 | 0.00 |
| ATOM | 1425 | C1'  | RA  | 45 | -0.231 | -30.199 | -2.598 | 0.00 | 0.00 |
| ATOM | 1426 | H1'  | RA  | 45 | -0.975 | -29.700 | -3.186 | 0.00 | 0.00 |
| ATOM | 1427 | N9   | RA  | 45 | 0.905  | -29.283 | -2.460 | 0.00 | 0.00 |
| ATOM | 1428 | C8   | RA  | 45 | 1.775  | -29.119 | -1.437 | 0.00 | 0.00 |
| ATOM | 1429 | H8   | RA  | 45 | 1.717  | -29.694 | -0.553 | 0.00 | 0.00 |
| ATOM | 1430 | N7   | RA  | 45 | 2.660  | -28.195 | -1.626 | 0.00 | 0.00 |
| ATOM | 1431 | C5   | RA  | 45 | 2.362  | -27.725 | -2.888 | 0.00 | 0.00 |
| ATOM | 1432 | C6   | RA  | 45 | 2.896  | -26.760 | -3.748 | 0.00 | 0.00 |
| ATOM | 1433 | N6   | RA  | 45 | 3.904  | -25.989 | -3.489 | 0.00 | 0.00 |
| ATOM | 1434 | H61  | RA  | 45 | 4.179  | -25.317 | -4.156 | 0.00 | 0.00 |
| ATOM | 1435 | H62  | RA  | 45 | 4.320  | -26.052 | -2.613 | 0.00 | 0.00 |
| ATOM | 1436 | N1   | RA  | 45 | 2.393  | -26.562 | -4.940 | 0.00 | 0.00 |
| ATOM | 1437 | C2   | RA  | 45 | 1.375  | -27.295 | -5.301 | 0.00 | 0.00 |
| ATOM | 1438 | H2   | RA  | 45 | 0.984  | -27.098 | -6.264 | 0.00 | 0.00 |
| ATOM | 1439 | N3   | RA  | 45 | 0.749  | -28.225 | -4.614 | 0.00 | 0.00 |
| ATOM | 1440 | C4   | RA  | 45 | 1.302  | -28.392 | -3.405 | 0.00 | 0.00 |
| ATOM | 1441 | C3'  | RA  | 45 | 0.443  | -32.386 | -2.119 | 0.00 | 0.00 |
| ATOM | 1442 | H3'  | RA  | 45 | 1.401  | -32.165 | -1.713 | 0.00 | 0.00 |
| ATOM | 1443 | C2'  | RA  | 45 | 0.176  | -31.480 | -3.293 | 0.00 | 0.00 |
| ATOM | 1444 | 1H2' | RA  | 45 | 1.055  | -31.347 | -3.889 | 0.00 | 0.00 |
| ATOM | 1445 | O2'  | RA  | 45 | -0.892 | -31.929 | -4.077 | 0.00 | 0.00 |
| ATOM | 1446 | 2HO' | RA  | 45 | -0.963 | -32.481 | -4.196 | 0.00 | 0.00 |
| ATOM | 1447 | O3'  | RA  | 45 | 0.326  | -33.730 | -2.448 | 0.00 | 0.00 |
| ATOM | 1448 | P    | RG3 | 46 | 1.558  | -34.563 | -2.864 | 0.00 | 0.00 |
| ATOM | 1449 | O1P  | RG3 | 46 | 1.119  | -35.925 | -3.020 | 0.00 | 0.00 |
| ATOM | 1450 | O2P  | RG3 | 46 | 2.611  | -34.271 | -1.929 | 0.00 | 0.00 |
| ATOM | 1451 | O5'  | RG3 | 46 | 1.978  | -34.012 | -4.258 | 0.00 | 0.00 |
| ATOM | 1452 | C5'  | RG3 | 46 | 1.240  | -34.280 | -5.411 | 0.00 | 0.00 |
| ATOM | 1453 | 1H5' | RG3 | 46 | 0.248  | -33.969 | -5.267 | 0.00 | 0.00 |
| ATOM | 1454 | 2H5' | RG3 | 46 | 1.246  | -35.324 | -5.595 | 0.00 | 0.00 |
| ATOM | 1455 | C4'  | RG3 | 46 | 1.778  | -33.587 | -6.620 | 0.00 | 0.00 |
| ATOM | 1456 | H4'  | RG3 | 46 | 1.141  | -33.827 | -7.440 | 0.00 | 0.00 |
| ATOM | 1457 | O4'  | RG3 | 46 | 1.789  | -32.203 | -6.441 | 0.00 | 0.00 |
| ATOM | 1458 | C1'  | RG3 | 46 | 2.947  | -31.687 | -6.922 | 0.00 | 0.00 |
| ATOM | 1459 | H1'  | RG3 | 46 | 2.782  | -31.153 | -7.754 | 0.00 | 0.00 |
| ATOM | 1460 | N9   | RG3 | 46 | 3.616  | -30.807 | -6.010 | 0.00 | 0.00 |
| ATOM | 1461 | C8   | RG3 | 46 | 3.858  | -30.981 | -4.696 | 0.00 | 0.00 |
| ATOM | 1462 | H8   | RG3 | 46 | 3.452  | -31.788 | -4.149 | 0.00 | 0.00 |
| ATOM | 1463 | N7   | RG3 | 46 | 4.631  | -30.100 | -4.189 | 0.00 | 0.00 |
| ATOM | 1464 | C5   | RG3 | 46 | 4.931  | -29.272 | -5.247 | 0.00 | 0.00 |
| ATOM | 1465 | C6   | RG3 | 46 | 5.782  | -28.149 | -5.351 | 0.00 | 0.00 |
| ATOM | 1466 | O6   | RG3 | 46 | 6.467  | -27.628 | -4.515 | 0.00 | 0.00 |
| ATOM | 1467 | N1   | RG3 | 46 | 5.834  | -27.614 | -6.589 | 0.00 | 0.00 |
| ATOM | 1468 | H1   | RG3 | 46 | 6.443  | -26.850 | -6.730 | 0.00 | 0.00 |
| ATOM | 1469 | C2   | RG3 | 46 | 5.182  | -28.118 | -7.624 | 0.00 | 0.00 |
| ATOM | 1470 | N2   | RG3 | 46 | 5.380  | -27.554 | -8.745 | 0.00 | 0.00 |
| ATOM | 1471 | H21  | RG3 | 46 | 6.018  | -26.804 | -8.823 | 0.00 | 0.00 |
| ATOM | 1472 | H22  | RG3 | 46 | 4.950  | -27.932 | -9.527 | 0.00 | 0.00 |
| ATOM | 1473 | N3   | RG3 | 46 | 4.389  | -29.157 | -7.587 | 0.00 | 0.00 |
| ATOM | 1474 | C4   | RG3 | 46 | 4.298  | -29.695 | -6.360 | 0.00 | 0.00 |
| ATOM | 1475 | C3'  | RG3 | 46 | 3.157  | -33.999 | -6.975 | 0.00 | 0.00 |
| ATOM | 1476 | H3'  | RG3 | 46 | 3.589  | -34.364 | -6.237 | 0.00 | 0.00 |
| ATOM | 1477 | C2'  | RG3 | 46 | 3.741  | -32.820 | -7.271 | 0.00 | 0.00 |
| ATOM | 1478 | 1H2' | RG3 | 46 | 4.445  | -32.746 | -6.842 | 0.00 | 0.00 |
| ATOM | 1479 | O2'  | RG3 | 46 | 3.944  | -32.860 | -8.341 | 0.00 | 0.00 |
| ATOM | 1480 | 2HO' | RG3 | 46 | 4.398  | -33.046 | -8.429 | 0.00 | 0.00 |
| ATOM | 1481 | O3'  | RG3 | 46 | 3.299  | -34.794 | -7.957 | 0.00 | 0.00 |
| ATOM | 1482 | H3T  | RG3 | 46 | 3.771  | -34.721 | -8.251 | 0.00 | 0.00 |
